# Supplementary material for: Mysteriously high Δ 14 C of the glacial atmosphere: influence of 14 C production and carbon cycle changes
Source: Copernicus journal article supplement (doi:10.5194/cp-16-1159-2020), 2020-07-09
Supplement: Supplementary file 1 [file cp-16-1159-2020-supplement.zip]

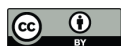

## *Supplement of*

# **Mysteriously high $\Delta^{14}\text{C}$ of the glacial atmosphere: influence of $^{14}\text{C}$ production and carbon cycle changes**

**Ashley Dinauer et al.**

*Correspondence to:* Ashley Dinauer (ashley.dinauer@climate.unibe.ch)

- cp-16-1159-2020-supplement-title-page.pdf
- fig07,08,10\_data
  - Fig10a\_data.csv
  - Fig7b\_data.csv
  - Fig8a\_data.csv

The copyright of individual parts of the supplement might differ from the CC BY 4.0 License.
