# Supplementary material for: Mysteriously high Δ 14 C of the glacial atmosphere: influence of 14 C production and carbon cycle changes
Source: Copernicus journal article supplement (doi:10.5194/cp-16-1159-2020), 2020-07-09
Supplement: Supplementary file 2 [file cp-16-1159-2020-supplement.zip]

Archive with 5 entries (4 files):
- fig07,08,10_data/
- fig07,08,10_data/Fig8a_data.csv
- fig07,08,10_data/Fig10a_data.csv
- fig07,08,10_data/Fig7b_data.csv
- cp-16-1159-2020-supplement-title-page.pdf
