# Supplementary material for: Mysteriously high Δ 14 C of the glacial atmosphere: influence of 14 C production and carbon cycle changes
Source: Copernicus journal article supplement (doi:10.5194/cp-16-1159-2020), 2020-07-09
Supplement: Supplementary file 2 [file cp-16-1159-2020-supplement.zip › fig07,08,10_data/Fig7b_data.csv]

# Time (yr BP)	Laj et al. 2000 (permil)	Laj et al. 2004 (permil)	Nowaczyk et al. 2013 (permil)	Channell et al. 2018 (permil)	Mean of RPI stacks (permil)	Adolphi et al. 2018 (permil)
49999.50	82.57	-24.61	74.65	44.20	44.20	12.59
49998.50	82.54	-24.61	74.64	44.19	44.19	12.61
49997.50	82.51	-24.61	74.63	44.18	44.18	12.63
49996.50	82.48	-24.61	74.62	44.16	44.16	12.65
49995.50	82.46	-24.61	74.61	44.15	44.15	12.67
49994.50	82.44	-24.61	74.60	44.14	44.14	12.70
49993.50	82.41	-24.62	74.59	44.13	44.13	12.72
49992.50	82.38	-24.62	74.57	44.11	44.11	12.74
49991.50	82.35	-24.62	74.56	44.10	44.10	12.76
49990.50	82.33	-24.62	74.55	44.08	44.08	12.78
49989.50	82.30	-24.63	74.54	44.07	44.07	12.79
49988.50	82.27	-24.63	74.52	44.05	44.05	12.81
49987.50	82.24	-24.63	74.51	44.04	44.04	12.83
49986.50	82.21	-24.63	74.50	44.03	44.03	12.85
49985.50	82.18	-24.64	74.49	44.01	44.01	12.86
49984.50	82.16	-24.64	74.47	44.00	44.00	12.88
49983.50	82.13	-24.65	74.46	43.98	43.98	12.89
49982.50	82.10	-24.65	74.45	43.96	43.96	12.91
49981.50	82.07	-24.65	74.44	43.95	43.95	12.93
49980.50	82.04	-24.66	74.42	43.93	43.93	12.94
49979.50	82.01	-24.66	74.41	43.92	43.92	12.96
49978.50	81.99	-24.66	74.40	43.91	43.91	12.98
49977.50	81.96	-24.67	74.39	43.89	43.89	12.99
49976.50	81.93	-24.67	74.37	43.88	43.88	13.01
49975.50	81.90	-24.68	74.36	43.86	43.86	13.03
49974.50	81.87	-24.68	74.35	43.84	43.84	13.04
49973.50	81.84	-24.69	74.33	43.83	43.83	13.05
49972.50	81.81	-24.69	74.32	43.81	43.81	13.07
49971.50	81.78	-24.70	74.31	43.80	43.80	13.08
49970.50	81.76	-24.70	74.29	43.78	43.78	13.10
49969.50	81.73	-24.70	74.28	43.77	43.77	13.11
49968.50	81.70	-24.71	74.27	43.75	43.75	13.13
49967.50	81.67	-24.71	74.25	43.74	43.74	13.14
49966.50	81.64	-24.72	74.24	43.72	43.72	13.16
49965.50	81.62	-24.72	74.23	43.71	43.71	13.17
49964.50	81.59	-24.72	74.22	43.69	43.69	13.19
49963.50	81.56	-24.73	74.21	43.68	43.68	13.20
49962.50	81.53	-24.73	74.20	43.67	43.67	13.22
49961.50	81.51	-24.74	74.18	43.65	43.65	13.23
49960.50	81.48	-24.74	74.17	43.63	43.63	13.24
49959.50	81.45	-24.75	74.15	43.62	43.62	13.25
49958.50	81.42	-24.75	74.14	43.60	43.60	13.26
49957.50	81.39	-24.76	74.13	43.59	43.59	13.28
49956.50	81.36	-24.76	74.12	43.57	43.57	13.29
49955.50	81.33	-24.77	74.10	43.56	43.56	13.30
49954.50	81.31	-24.77	74.09	43.54	43.54	13.32
49953.50	81.28	-24.78	74.08	43.53	43.53	13.33
49952.50	81.25	-24.78	74.07	43.51	43.51	13.34
49951.50	81.23	-24.78	74.06	43.50	43.50	13.36
49950.50	81.20	-24.79	74.04	43.49	43.49	13.37
49949.50	81.17	-24.79	74.03	43.47	43.47	13.38
49948.50	81.15	-24.79	74.02	43.46	43.46	13.39
49947.50	81.12	-24.80	74.01	43.44	43.44	13.41
49946.50	81.09	-24.80	74.00	43.43	43.43	13.42
49945.50	81.07	-24.81	73.99	43.42	43.42	13.43
49944.50	81.04	-24.81	73.98	43.40	43.40	13.44
49943.50	81.01	-24.82	73.96	43.39	43.39	13.45
49942.50	80.98	-24.82	73.95	43.37	43.37	13.46
49941.50	80.96	-24.83	73.94	43.36	43.36	13.47
49940.50	80.93	-24.83	73.93	43.34	43.34	13.49
49939.50	80.90	-24.84	73.91	43.33	43.33	13.50
49938.50	80.87	-24.84	73.90	43.31	43.31	13.50
49937.50	80.84	-24.85	73.88	43.29	43.29	13.51
49936.50	80.81	-24.86	73.87	43.27	43.27	13.52
49935.50	80.78	-24.87	73.86	43.26	43.26	13.53
49934.50	80.76	-24.87	73.84	43.24	43.24	13.54
49933.50	80.73	-24.88	73.83	43.23	43.23	13.54
49932.50	80.70	-24.88	73.82	43.21	43.21	13.55
49931.50	80.67	-24.89	73.81	43.20	43.20	13.56
49930.50	80.64	-24.90	73.79	43.18	43.18	13.57
49929.50	80.61	-24.91	73.77	43.16	43.16	13.57
49928.50	80.58	-24.91	73.76	43.14	43.14	13.58
49927.50	80.55	-24.92	73.75	43.13	43.13	13.58
49926.50	80.52	-24.93	73.73	43.11	43.11	13.59
49925.50	80.49	-24.94	73.72	43.09	43.09	13.59
49924.50	80.47	-24.94	73.70	43.08	43.08	13.60
49923.50	80.44	-24.95	73.69	43.06	43.06	13.61
49922.50	80.41	-24.96	73.68	43.04	43.04	13.61
49921.50	80.38	-24.96	73.66	43.03	43.03	13.61
49920.50	80.35	-24.97	73.65	43.01	43.01	13.62
49919.50	80.33	-24.98	73.64	43.00	43.00	13.63
49918.50	80.29	-24.99	73.62	42.97	42.97	13.63
49917.50	80.27	-24.99	73.61	42.96	42.96	13.63
49916.50	80.24	-25.00	73.60	42.95	42.95	13.64
49915.50	80.21	-25.01	73.58	42.93	42.93	13.65
49914.50	80.19	-25.01	73.57	42.92	42.92	13.65
49913.50	80.16	-25.02	73.56	42.90	42.90	13.66
49912.50	80.13	-25.02	73.55	42.89	42.89	13.66
49911.50	80.11	-25.03	73.54	42.87	42.87	13.67
49910.50	80.09	-25.03	73.53	42.86	42.86	13.68
49909.50	80.06	-25.04	73.51	42.85	42.85	13.68
49908.50	80.03	-25.04	73.50	42.83	42.83	13.69
49907.50	80.00	-25.05	73.49	42.81	42.81	13.69
49906.50	79.98	-25.06	73.47	42.80	42.80	13.69
49905.50	79.95	-25.07	73.46	42.78	42.78	13.70
49904.50	79.92	-25.07	73.45	42.77	42.77	13.70
49903.50	79.90	-25.08	73.43	42.75	42.75	13.70
49902.50	79.86	-25.09	73.42	42.73	42.73	13.70
49901.50	79.84	-25.10	73.40	42.71	42.71	13.70
49900.50	79.81	-25.11	73.39	42.70	42.70	13.70
49899.50	79.78	-25.12	73.37	42.68	42.68	13.70
49898.50	79.75	-25.13	73.36	42.66	42.66	13.70
49897.50	79.72	-25.13	73.35	42.65	42.65	13.70
49896.50	79.70	-25.14	73.33	42.63	42.63	13.70
49895.50	79.67	-25.15	73.32	42.61	42.61	13.70
49894.50	79.64	-25.16	73.31	42.60	42.60	13.70
49893.50	79.61	-25.16	73.29	42.58	42.58	13.70
49892.50	79.59	-25.17	73.28	42.57	42.57	13.71
49891.50	79.57	-25.17	73.27	42.56	42.56	13.71
49890.50	79.54	-25.18	73.26	42.54	42.54	13.71
49889.50	79.51	-25.19	73.25	42.52	42.52	13.71
49888.50	79.49	-25.20	73.23	42.51	42.51	13.71
49887.50	79.46	-25.21	73.22	42.49	42.49	13.71
49886.50	79.43	-25.22	73.20	42.47	42.47	13.70
49885.50	79.40	-25.23	73.18	42.45	42.45	13.70
49884.50	79.37	-25.24	73.17	42.43	42.43	13.69
49883.50	79.34	-25.24	73.16	42.42	42.42	13.69
49882.50	79.32	-25.25	73.14	42.40	42.40	13.69
49881.50	79.29	-25.26	73.13	42.39	42.39	13.69
49880.50	79.26	-25.27	73.12	42.37	42.37	13.69
49879.50	79.24	-25.27	73.10	42.36	42.36	13.68
49878.50	79.21	-25.28	73.09	42.34	42.34	13.68
49877.50	79.18	-25.29	73.07	42.32	42.32	13.67
49876.50	79.15	-25.30	73.06	42.30	42.30	13.67
49875.50	79.12	-25.31	73.04	42.28	42.28	13.66
49874.50	79.10	-25.32	73.03	42.27	42.27	13.66
49873.50	79.07	-25.33	73.01	42.25	42.25	13.65
49872.50	79.04	-25.34	73.00	42.23	42.23	13.65
49871.50	79.02	-25.35	72.99	42.22	42.22	13.64
49870.50	78.99	-25.36	72.97	42.20	42.20	13.64
49869.50	78.96	-25.37	72.96	42.19	42.19	13.63
49868.50	78.93	-25.38	72.94	42.17	42.17	13.62
49867.50	78.91	-25.39	72.93	42.15	42.15	13.62
49866.50	78.88	-25.40	72.91	42.13	42.13	13.61
49865.50	78.85	-25.41	72.89	42.11	42.11	13.60
49864.50	78.82	-25.42	72.88	42.09	42.09	13.59
49863.50	78.79	-25.43	72.86	42.08	42.08	13.58
49862.50	78.76	-25.44	72.84	42.05	42.05	13.57
49861.50	78.73	-25.45	72.83	42.04	42.04	13.56
49860.50	78.71	-25.46	72.82	42.02	42.02	13.56
49859.50	78.68	-25.47	72.80	42.01	42.01	13.55
49858.50	78.66	-25.48	72.79	41.99	41.99	13.54
49857.50	78.63	-25.49	72.77	41.97	41.97	13.53
49856.50	78.60	-25.50	72.76	41.95	41.95	13.52
49855.50	78.58	-25.51	72.74	41.94	41.94	13.51
49854.50	78.55	-25.52	72.73	41.92	41.92	13.50
49853.50	78.52	-25.53	72.71	41.90	41.90	13.49
49852.50	78.49	-25.54	72.69	41.88	41.88	13.48
49851.50	78.46	-25.55	72.68	41.86	41.86	13.47
49850.50	78.44	-25.56	72.66	41.85	41.85	13.46
49849.50	78.41	-25.57	72.64	41.83	41.83	13.44
49848.50	78.38	-25.58	72.63	41.81	41.81	13.43
49847.50	78.35	-25.59	72.61	41.79	41.79	13.42
49846.50	78.32	-25.60	72.60	41.77	41.77	13.41
49845.50	78.30	-25.61	72.58	41.75	41.75	13.39
49844.50	78.27	-25.62	72.57	41.74	41.74	13.38
49843.50	78.24	-25.63	72.55	41.72	41.72	13.37
49842.50	78.22	-25.64	72.53	41.70	41.70	13.36
49841.50	78.19	-25.65	72.52	41.69	41.69	13.34
49840.50	78.17	-25.66	72.50	41.67	41.67	13.33
49839.50	78.14	-25.67	72.49	41.65	41.65	13.32
49838.50	78.11	-25.68	72.47	41.63	41.63	13.30
49837.50	78.08	-25.70	72.45	41.61	41.61	13.29
49836.50	78.05	-25.71	72.44	41.59	41.59	13.27
49835.50	78.02	-25.72	72.42	41.57	41.57	13.25
49834.50	77.99	-25.74	72.40	41.55	41.55	13.23
49833.50	77.96	-25.75	72.38	41.53	41.53	13.21
49832.50	77.94	-25.76	72.36	41.51	41.51	13.20
49831.50	77.91	-25.77	72.34	41.49	41.49	13.18
49830.50	77.88	-25.78	72.33	41.48	41.48	13.17
49829.50	77.86	-25.79	72.31	41.46	41.46	13.15
49828.50	77.83	-25.80	72.30	41.44	41.44	13.13
49827.50	77.81	-25.81	72.28	41.43	41.43	13.12
49826.50	77.78	-25.82	72.27	41.41	41.41	13.10
49825.50	77.75	-25.83	72.25	41.39	41.39	13.08
49824.50	77.73	-25.84	72.23	41.37	41.37	13.07
49823.50	77.70	-25.85	72.22	41.36	41.36	13.05
49822.50	77.68	-25.87	72.20	41.34	41.34	13.03
49821.50	77.65	-25.88	72.18	41.32	41.32	13.01
49820.50	77.62	-25.89	72.16	41.30	41.30	12.99
49819.50	77.59	-25.90	72.15	41.28	41.28	12.97
49818.50	77.56	-25.92	72.13	41.26	41.26	12.95
49817.50	77.54	-25.93	72.11	41.24	41.24	12.93
49816.50	77.51	-25.94	72.09	41.22	41.22	12.90
49815.50	77.48	-25.95	72.07	41.20	41.20	12.88
49814.50	77.46	-25.96	72.06	41.18	41.18	12.86
49813.50	77.43	-25.98	72.04	41.16	41.16	12.84
49812.50	77.40	-25.99	72.02	41.14	41.14	12.82
49811.50	77.37	-26.00	72.00	41.12	41.12	12.79
49810.50	77.35	-26.01	71.98	41.11	41.11	12.77
49809.50	77.32	-26.03	71.97	41.09	41.09	12.75
49808.50	77.29	-26.04	71.95	41.07	41.07	12.73
49807.50	77.27	-26.05	71.93	41.05	41.05	12.71
49806.50	77.24	-26.06	71.92	41.03	41.03	12.68
49805.50	77.22	-26.07	71.90	41.02	41.02	12.66
49804.50	77.19	-26.08	71.89	41.00	41.00	12.64
49803.50	77.17	-26.09	71.87	40.98	40.98	12.62
49802.50	77.14	-26.10	71.85	40.97	40.97	12.60
49801.50	77.12	-26.11	71.84	40.95	40.95	12.57
49800.50	77.09	-26.12	71.82	40.93	40.93	12.55
49799.50	77.06	-26.13	71.80	40.91	40.91	12.52
49798.50	77.04	-26.15	71.78	40.89	40.89	12.50
49797.50	77.01	-26.16	71.76	40.87	40.87	12.47
49796.50	76.98	-26.17	71.74	40.85	40.85	12.44
49795.50	76.95	-26.19	71.72	40.83	40.83	12.41
49794.50	76.92	-26.20	71.70	40.81	40.81	12.38
49793.50	76.90	-26.22	71.68	40.79	40.79	12.35
49792.50	76.87	-26.23	71.66	40.77	40.77	12.33
49791.50	76.84	-26.24	71.64	40.75	40.75	12.30
49790.50	76.82	-26.25	71.62	40.73	40.73	12.27
49789.50	76.79	-26.27	71.60	40.71	40.71	12.24
49788.50	76.76	-26.28	71.58	40.69	40.69	12.21
49787.50	76.73	-26.30	71.56	40.67	40.67	12.18
49786.50	76.70	-26.31	71.54	40.65	40.65	12.15
49785.50	76.68	-26.32	71.52	40.63	40.63	12.12
49784.50	76.65	-26.34	71.50	40.61	40.61	12.09
49783.50	76.62	-26.35	71.48	40.59	40.59	12.06
49782.50	76.60	-26.36	71.46	40.57	40.57	12.03
49781.50	76.57	-26.38	71.44	40.55	40.55	11.99
49780.50	76.54	-26.39	71.42	40.53	40.53	11.96
49779.50	76.51	-26.40	71.40	40.50	40.50	11.93
49778.50	76.49	-26.42	71.38	40.48	40.48	11.90
49777.50	76.46	-26.43	71.36	40.46	40.46	11.87
49776.50	76.43	-26.44	71.34	40.44	40.44	11.83
49775.50	76.40	-26.46	71.32	40.42	40.42	11.80
49774.50	76.37	-26.47	71.30	40.40	40.40	11.76
49773.50	76.35	-26.49	71.28	40.38	40.38	11.73
49772.50	76.33	-26.50	71.26	40.36	40.36	11.70
49771.50	76.30	-26.51	71.25	40.35	40.35	11.67
49770.50	76.28	-26.51	71.23	40.33	40.33	11.64
49769.50	76.26	-26.53	71.21	40.31	40.31	11.61
49768.50	76.23	-26.54	71.19	40.29	40.29	11.57
49767.50	76.20	-26.55	71.17	40.27	40.27	11.54
49766.50	76.18	-26.56	71.15	40.25	40.25	11.51
49765.50	76.15	-26.58	71.13	40.24	40.24	11.47
49764.50	76.13	-26.59	71.11	40.22	40.22	11.44
49763.50	76.10	-26.60	71.09	40.20	40.20	11.40
49762.50	76.08	-26.61	71.08	40.18	40.18	11.37
49761.50	76.05	-26.63	71.06	40.16	40.16	11.33
49760.50	76.02	-26.64	71.03	40.14	40.14	11.29
49759.50	76.00	-26.65	71.01	40.12	40.12	11.25
49758.50	75.97	-26.67	70.99	40.10	40.10	11.22
49757.50	75.94	-26.68	70.97	40.08	40.08	11.18
49756.50	75.92	-26.69	70.95	40.06	40.06	11.14
49755.50	75.89	-26.71	70.93	40.04	40.04	11.10
49754.50	75.86	-26.72	70.91	40.02	40.02	11.06
49753.50	75.84	-26.73	70.89	40.00	40.00	11.02
49752.50	75.81	-26.75	70.87	39.98	39.98	10.99
49751.50	75.79	-26.76	70.85	39.96	39.96	10.95
49750.50	75.76	-26.78	70.82	39.93	39.93	10.90
49749.50	75.73	-26.79	70.80	39.91	39.91	10.86
49748.50	75.70	-26.81	70.78	39.89	39.89	10.82
49747.50	75.67	-26.82	70.76	39.87	39.87	10.78
49746.50	75.65	-26.83	70.74	39.85	39.85	10.74
49745.50	75.63	-26.85	70.72	39.83	39.83	10.70
49744.50	75.60	-26.86	70.70	39.81	39.81	10.66
49743.50	75.57	-26.87	70.67	39.79	39.79	10.61
49742.50	75.55	-26.89	70.65	39.77	39.77	10.57
49741.50	75.52	-26.90	70.63	39.75	39.75	10.53
49740.50	75.50	-26.91	70.61	39.73	39.73	10.49
49739.50	75.47	-26.93	70.59	39.71	39.71	10.44
49738.50	75.44	-26.94	70.57	39.69	39.69	10.40
49737.50	75.42	-26.95	70.55	39.67	39.67	10.36
49736.50	75.39	-26.97	70.52	39.65	39.65	10.31
49735.50	75.36	-26.98	70.50	39.63	39.63	10.27
49734.50	75.34	-26.99	70.48	39.61	39.61	10.22
49733.50	75.31	-27.01	70.46	39.59	39.59	10.18
49732.50	75.29	-27.02	70.44	39.57	39.57	10.13
49731.50	75.26	-27.03	70.42	39.55	39.55	10.09
49730.50	75.24	-27.05	70.39	39.53	39.53	10.04
49729.50	75.21	-27.06	70.37	39.51	39.51	10.00
49728.50	75.18	-27.07	70.35	39.49	39.49	9.95
49727.50	75.16	-27.09	70.33	39.47	39.47	9.90
49726.50	75.13	-27.10	70.31	39.45	39.45	9.86
49725.50	75.11	-27.11	70.28	39.43	39.43	9.81
49724.50	75.08	-27.13	70.26	39.41	39.41	9.76
49723.50	75.06	-27.14	70.24	39.39	39.39	9.72
49722.50	75.03	-27.15	70.22	39.36	39.36	9.67
49721.50	75.00	-27.17	70.19	39.34	39.34	9.62
49720.50	74.98	-27.18	70.17	39.32	39.32	9.57
49719.50	74.95	-27.20	70.15	39.30	39.30	9.52
49718.50	74.92	-27.21	70.13	39.28	39.28	9.47
49717.50	74.90	-27.23	70.10	39.26	39.26	9.42
49716.50	74.87	-27.24	70.07	39.23	39.23	9.36
49715.50	74.84	-27.26	70.05	39.21	39.21	9.31
49714.50	74.81	-27.27	70.03	39.19	39.19	9.26
49713.50	74.79	-27.29	70.00	39.17	39.17	9.21
49712.50	74.76	-27.30	69.98	39.14	39.14	9.16
49711.50	74.73	-27.32	69.95	39.12	39.12	9.10
49710.50	74.71	-27.33	69.93	39.10	39.10	9.05
49709.50	74.68	-27.35	69.91	39.08	39.08	9.00
49708.50	74.66	-27.36	69.89	39.06	39.06	8.95
49707.50	74.63	-27.37	69.86	39.04	39.04	8.90
49706.50	74.60	-27.39	69.84	39.02	39.02	8.84
49705.50	74.58	-27.40	69.82	39.00	39.00	8.79
49704.50	74.55	-27.41	69.79	38.98	38.98	8.74
49703.50	74.53	-27.43	69.77	38.95	38.95	8.68
49702.50	74.50	-27.44	69.75	38.94	38.94	8.63
49701.50	74.48	-27.45	69.72	38.92	38.92	8.58
49700.50	74.45	-27.47	69.70	38.90	38.90	8.52
49699.50	74.43	-27.48	69.68	38.88	38.88	8.47
49698.50	74.40	-27.49	69.66	38.86	38.86	8.42
49697.50	74.38	-27.50	69.63	38.84	38.84	8.36
49696.50	74.35	-27.52	69.61	38.81	38.81	8.30
49695.50	74.33	-27.53	69.58	38.79	38.79	8.25
49694.50	74.30	-27.55	69.56	38.77	38.77	8.19
49693.50	74.27	-27.56	69.54	38.75	38.75	8.13
49692.50	74.25	-27.57	69.51	38.73	38.73	8.08
49691.50	74.22	-27.59	69.49	38.71	38.71	8.02
49690.50	74.20	-27.60	69.47	38.69	38.69	7.96
49689.50	74.17	-27.61	69.44	38.67	38.67	7.91
49688.50	74.15	-27.63	69.42	38.65	38.65	7.85
49687.50	74.12	-27.65	69.39	38.62	38.62	7.79
49686.50	74.09	-27.66	69.37	38.60	38.60	7.72
49685.50	74.06	-27.68	69.34	38.58	38.58	7.66
49684.50	74.04	-27.69	69.31	38.55	38.55	7.60
49683.50	74.01	-27.71	69.29	38.53	38.53	7.54
49682.50	73.98	-27.72	69.26	38.51	38.51	7.48
49681.50	73.96	-27.73	69.24	38.49	38.49	7.42
49680.50	73.93	-27.75	69.21	38.47	38.47	7.36
49679.50	73.91	-27.76	69.19	38.45	38.45	7.30
49678.50	73.88	-27.77	69.17	38.42	38.42	7.24
49677.50	73.86	-27.79	69.14	38.41	38.41	7.18
49676.50	73.84	-27.80	69.12	38.39	38.39	7.12
49675.50	73.81	-27.81	69.10	38.37	38.37	7.06
49674.50	73.79	-27.82	69.08	38.35	38.35	7.00
49673.50	73.77	-27.83	69.06	38.33	38.33	6.95
49672.50	73.74	-27.85	69.03	38.31	38.31	6.88
49671.50	73.71	-27.86	69.00	38.29	38.29	6.82
49670.50	73.69	-27.88	68.98	38.26	38.26	6.75
49669.50	73.66	-27.89	68.95	38.24	38.24	6.68
49668.50	73.63	-27.91	68.92	38.22	38.22	6.62
49667.50	73.61	-27.92	68.90	38.20	38.20	6.56
49666.50	73.58	-27.93	68.88	38.18	38.18	6.50
49665.50	73.56	-27.94	68.85	38.16	38.16	6.43
49664.50	73.53	-27.96	68.83	38.13	38.13	6.37
49663.50	73.51	-27.97	68.80	38.11	38.11	6.30
49662.50	73.48	-27.99	68.78	38.09	38.09	6.24
49661.50	73.46	-28.00	68.75	38.07	38.07	6.18
49660.50	73.44	-28.01	68.73	38.05	38.05	6.11
49659.50	73.42	-28.02	68.71	38.04	38.04	6.05
49658.50	73.39	-28.03	68.69	38.02	38.02	5.99
49657.50	73.37	-28.04	68.66	38.00	38.00	5.92
49656.50	73.35	-28.06	68.64	37.98	37.98	5.86
49655.50	73.32	-28.07	68.61	37.96	37.96	5.79
49654.50	73.30	-28.08	68.59	37.93	37.93	5.72
49653.50	73.27	-28.10	68.56	37.91	37.91	5.66
49652.50	73.25	-28.11	68.54	37.89	37.89	5.59
49651.50	73.22	-28.12	68.51	37.87	37.87	5.52
49650.50	73.19	-28.14	68.48	37.85	37.85	5.45
49649.50	73.17	-28.15	68.46	37.83	37.83	5.38
49648.50	73.14	-28.17	68.43	37.80	37.80	5.31
49647.50	73.12	-28.18	68.41	37.78	37.78	5.25
49646.50	73.10	-28.19	68.38	37.76	37.76	5.18
49645.50	73.07	-28.21	68.36	37.74	37.74	5.11
49644.50	73.04	-28.22	68.33	37.72	37.72	5.03
49643.50	73.02	-28.24	68.30	37.69	37.69	4.96
49642.50	72.99	-28.25	68.28	37.67	37.67	4.90
49641.50	72.97	-28.26	68.25	37.65	37.65	4.83
49640.50	72.95	-28.27	68.23	37.63	37.63	4.76
49639.50	72.92	-28.28	68.20	37.61	37.61	4.69
49638.50	72.90	-28.30	68.18	37.59	37.59	4.62
49637.50	72.87	-28.31	68.15	37.57	37.57	4.55
49636.50	72.85	-28.32	68.13	37.55	37.55	4.48
49635.50	72.82	-28.34	68.10	37.53	37.53	4.41
49634.50	72.80	-28.35	68.07	37.51	37.51	4.33
49633.50	72.77	-28.36	68.05	37.49	37.49	4.26
49632.50	72.75	-28.38	68.02	37.47	37.47	4.19
49631.50	72.73	-28.39	68.00	37.45	37.45	4.12
49630.50	72.70	-28.40	67.97	37.43	37.43	4.05
49629.50	72.68	-28.42	67.95	37.40	37.40	3.98
49628.50	72.65	-28.43	67.92	37.38	37.38	3.90
49627.50	72.63	-28.45	67.89	37.36	37.36	3.83
49626.50	72.60	-28.46	67.87	37.34	37.34	3.76
49625.50	72.58	-28.47	67.84	37.32	37.32	3.68
49624.50	72.55	-28.49	67.81	37.29	37.29	3.61
49623.50	72.53	-28.50	67.79	37.27	37.27	3.54
49622.50	72.51	-28.51	67.76	37.25	37.25	3.46
49621.50	72.48	-28.53	67.74	37.23	37.23	3.39
49620.50	72.46	-28.54	67.71	37.21	37.21	3.31
49619.50	72.43	-28.55	67.68	37.19	37.19	3.24
49618.50	72.41	-28.56	67.66	37.17	37.17	3.17
49617.50	72.39	-28.57	67.64	37.15	37.15	3.10
49616.50	72.37	-28.59	67.61	37.13	37.13	3.02
49615.50	72.34	-28.60	67.59	37.11	37.11	2.95
49614.50	72.32	-28.62	67.56	37.09	37.09	2.87
49613.50	72.29	-28.63	67.53	37.06	37.06	2.79
49612.50	72.26	-28.65	67.50	37.04	37.04	2.72
49611.50	72.24	-28.66	67.47	37.02	37.02	2.64
49610.50	72.22	-28.67	67.45	37.00	37.00	2.57
49609.50	72.19	-28.68	67.42	36.98	36.98	2.49
49608.50	72.17	-28.70	67.40	36.96	36.96	2.41
49607.50	72.14	-28.71	67.37	36.93	36.93	2.34
49606.50	72.12	-28.72	67.34	36.91	36.91	2.26
49605.50	72.10	-28.74	67.32	36.89	36.89	2.19
49604.50	72.08	-28.75	67.29	36.87	36.87	2.11
49603.50	72.05	-28.76	67.27	36.85	36.85	2.03
49602.50	72.03	-28.78	67.24	36.83	36.83	1.96
49601.50	72.00	-28.79	67.21	36.81	36.81	1.88
49600.50	71.98	-28.80	67.19	36.79	36.79	1.80
49599.50	71.95	-28.82	67.16	36.76	36.76	1.72
49598.50	71.93	-28.83	67.13	36.74	36.74	1.64
49597.50	71.91	-28.85	67.10	36.72	36.72	1.57
49596.50	71.88	-28.86	67.08	36.70	36.70	1.49
49595.50	71.86	-28.87	67.05	36.68	36.68	1.41
49594.50	71.83	-28.89	67.02	36.66	36.66	1.33
49593.50	71.81	-28.90	67.00	36.64	36.64	1.26
49592.50	71.79	-28.91	66.97	36.62	36.62	1.18
49591.50	71.76	-28.93	66.94	36.59	36.59	1.10
49590.50	71.74	-28.94	66.91	36.57	36.57	1.02
49589.50	71.71	-28.96	66.88	36.54	36.54	0.93
49588.50	71.68	-28.98	66.85	36.52	36.52	0.85
49587.50	71.66	-28.99	66.82	36.50	36.50	0.77
49586.50	71.63	-29.01	66.80	36.48	36.48	0.69
49585.50	71.61	-29.02	66.77	36.46	36.46	0.62
49584.50	71.59	-29.03	66.75	36.44	36.44	0.54
49583.50	71.57	-29.04	66.72	36.42	36.42	0.46
49582.50	71.54	-29.06	66.69	36.39	36.39	0.38
49581.50	71.52	-29.07	66.67	36.37	36.37	0.30
49580.50	71.49	-29.08	66.64	36.35	36.35	0.22
49579.50	71.47	-29.10	66.61	36.33	36.33	0.14
49578.50	71.45	-29.11	66.58	36.31	36.31	0.06
49577.50	71.43	-29.13	66.56	36.29	36.29	-0.02
49576.50	71.40	-29.14	66.53	36.27	36.27	-0.10
49575.50	71.38	-29.15	66.50	36.24	36.24	-0.18
49574.50	71.36	-29.17	66.48	36.22	36.22	-0.26
49573.50	71.33	-29.18	66.45	36.20	36.20	-0.34
49572.50	71.31	-29.20	66.42	36.18	36.18	-0.42
49571.50	71.29	-29.21	66.40	36.16	36.16	-0.50
49570.50	71.26	-29.22	66.37	36.14	36.14	-0.58
49569.50	71.24	-29.23	66.34	36.12	36.12	-0.66
49568.50	71.22	-29.24	66.32	36.10	36.10	-0.73
49567.50	71.21	-29.25	66.30	36.09	36.09	-0.81
49566.50	71.18	-29.27	66.27	36.06	36.06	-0.89
49565.50	71.15	-29.28	66.24	36.04	36.04	-0.98
49564.50	71.13	-29.30	66.21	36.01	36.01	-1.06
49563.50	71.10	-29.32	66.18	35.99	35.99	-1.14
49562.50	71.08	-29.33	66.15	35.97	35.97	-1.22
49561.50	71.06	-29.34	66.13	35.95	35.95	-1.30
49560.50	71.04	-29.36	66.10	35.93	35.93	-1.38
49559.50	71.01	-29.37	66.07	35.91	35.91	-1.46
49558.50	70.99	-29.38	66.04	35.88	35.88	-1.54
49557.50	70.97	-29.40	66.02	35.86	35.86	-1.62
49556.50	70.94	-29.41	65.99	35.84	35.84	-1.71
49555.50	70.92	-29.43	65.96	35.82	35.82	-1.79
49554.50	70.89	-29.45	65.93	35.79	35.79	-1.88
49553.50	70.87	-29.46	65.90	35.77	35.77	-1.96
49552.50	70.84	-29.48	65.87	35.74	35.74	-2.04
49551.50	70.82	-29.50	65.84	35.72	35.72	-2.13
49550.50	70.80	-29.51	65.82	35.70	35.70	-2.20
49549.50	70.78	-29.52	65.79	35.68	35.68	-2.28
49548.50	70.75	-29.53	65.76	35.66	35.66	-2.36
49547.50	70.73	-29.55	65.74	35.64	35.64	-2.45
49546.50	70.71	-29.56	65.71	35.62	35.62	-2.53
49545.50	70.68	-29.58	65.68	35.59	35.59	-2.61
49544.50	70.66	-29.60	65.65	35.57	35.57	-2.70
49543.50	70.63	-29.61	65.62	35.55	35.55	-2.78
49542.50	70.61	-29.63	65.59	35.52	35.52	-2.86
49541.50	70.59	-29.64	65.56	35.50	35.50	-2.94
49540.50	70.56	-29.66	65.53	35.48	35.48	-3.03
49539.50	70.53	-29.68	65.50	35.45	35.45	-3.11
49538.50	70.51	-29.69	65.48	35.43	35.43	-3.19
49537.50	70.49	-29.70	65.45	35.41	35.41	-3.27
49536.50	70.47	-29.72	65.42	35.39	35.39	-3.35
49535.50	70.44	-29.74	65.39	35.37	35.37	-3.43
49534.50	70.42	-29.75	65.36	35.34	35.34	-3.52
49533.50	70.40	-29.77	65.34	35.32	35.32	-3.60
49532.50	70.38	-29.78	65.31	35.30	35.30	-3.68
49531.50	70.35	-29.80	65.28	35.28	35.28	-3.76
49530.50	70.33	-29.81	65.25	35.26	35.26	-3.84
49529.50	70.31	-29.83	65.22	35.23	35.23	-3.92
49528.50	70.28	-29.84	65.19	35.21	35.21	-4.01
49527.50	70.26	-29.86	65.17	35.19	35.19	-4.08
49526.50	70.24	-29.87	65.14	35.17	35.17	-4.17
49525.50	70.22	-29.89	65.11	35.15	35.15	-4.25
49524.50	70.19	-29.91	65.08	35.12	35.12	-4.33
49523.50	70.17	-29.92	65.05	35.10	35.10	-4.41
49522.50	70.14	-29.94	65.02	35.07	35.07	-4.50
49521.50	70.12	-29.96	64.99	35.05	35.05	-4.58
49520.50	70.09	-29.98	64.96	35.03	35.03	-4.66
49519.50	70.07	-29.99	64.93	35.00	35.00	-4.75
49518.50	70.05	-30.01	64.91	34.98	34.98	-4.83
49517.50	70.03	-30.02	64.88	34.96	34.96	-4.91
49516.50	70.00	-30.04	64.85	34.94	34.94	-4.99
49515.50	69.98	-30.06	64.82	34.91	34.91	-5.07
49514.50	69.95	-30.08	64.79	34.89	34.89	-5.15
49513.50	69.93	-30.09	64.76	34.86	34.86	-5.24
49512.50	69.91	-30.11	64.73	34.84	34.84	-5.32
49511.50	69.88	-30.13	64.70	34.82	34.82	-5.40
49510.50	69.86	-30.14	64.67	34.80	34.80	-5.48
49509.50	69.84	-30.16	64.64	34.77	34.77	-5.56
49508.50	69.81	-30.18	64.61	34.75	34.75	-5.64
49507.50	69.79	-30.20	64.59	34.73	34.73	-5.72
49506.50	69.77	-30.21	64.56	34.70	34.70	-5.81
49505.50	69.74	-30.23	64.53	34.68	34.68	-5.89
49504.50	69.72	-30.25	64.50	34.66	34.66	-5.97
49503.50	69.70	-30.26	64.47	34.64	34.64	-6.05
49502.50	69.68	-30.28	64.45	34.62	34.62	-6.12
49501.50	69.66	-30.29	64.42	34.60	34.60	-6.20
49500.50	69.64	-30.31	64.39	34.57	34.57	-6.28
49499.50	69.61	-30.33	64.36	34.55	34.55	-6.36
49498.50	69.59	-30.35	64.33	34.52	34.52	-6.44
49497.50	69.57	-30.36	64.30	34.50	34.50	-6.52
49496.50	69.54	-30.38	64.27	34.48	34.48	-6.60
49495.50	69.52	-30.40	64.25	34.46	34.46	-6.68
49494.50	69.50	-30.41	64.22	34.43	34.43	-6.76
49493.50	69.47	-30.43	64.19	34.41	34.41	-6.84
49492.50	69.45	-30.45	64.16	34.39	34.39	-6.92
49491.50	69.43	-30.47	64.13	34.37	34.37	-7.00
49490.50	69.41	-30.48	64.10	34.34	34.34	-7.08
49489.50	69.39	-30.50	64.07	34.32	34.32	-7.16
49488.50	69.36	-30.52	64.04	34.30	34.30	-7.24
49487.50	69.34	-30.54	64.02	34.27	34.27	-7.32
49486.50	69.31	-30.56	63.99	34.25	34.25	-7.40
49485.50	69.29	-30.58	63.96	34.22	34.22	-7.48
49484.50	69.27	-30.59	63.93	34.20	34.20	-7.55
49483.50	69.25	-30.61	63.90	34.18	34.18	-7.63
49482.50	69.23	-30.63	63.87	34.16	34.16	-7.71
49481.50	69.21	-30.65	63.85	34.14	34.14	-7.79
49480.50	69.18	-30.66	63.82	34.11	34.11	-7.87
49479.50	69.16	-30.68	63.79	34.09	34.09	-7.95
49478.50	69.14	-30.70	63.76	34.07	34.07	-8.02
49477.50	69.11	-30.72	63.73	34.04	34.04	-8.10
49476.50	69.09	-30.74	63.70	34.02	34.02	-8.18
49475.50	69.07	-30.76	63.67	33.99	33.99	-8.26
49474.50	69.05	-30.78	63.64	33.97	33.97	-8.34
49473.50	69.02	-30.80	63.62	33.95	33.95	-8.41
49472.50	69.01	-30.81	63.59	33.93	33.93	-8.49
49471.50	68.99	-30.83	63.56	33.91	33.91	-8.56
49470.50	68.96	-30.85	63.54	33.88	33.88	-8.64
49469.50	68.94	-30.87	63.51	33.86	33.86	-8.71
49468.50	68.92	-30.88	63.48	33.84	33.84	-8.79
49467.50	68.90	-30.90	63.46	33.82	33.82	-8.86
49466.50	68.88	-30.92	63.43	33.80	33.80	-8.94
49465.50	68.86	-30.94	63.40	33.77	33.77	-9.02
49464.50	68.83	-30.96	63.37	33.75	33.75	-9.10
49463.50	68.81	-30.98	63.34	33.72	33.72	-9.17
49462.50	68.79	-31.00	63.31	33.70	33.70	-9.25
49461.50	68.76	-31.02	63.28	33.67	33.67	-9.32
49460.50	68.74	-31.04	63.25	33.65	33.65	-9.40
49459.50	68.72	-31.06	63.22	33.63	33.63	-9.47
49458.50	68.70	-31.08	63.19	33.60	33.60	-9.55
49457.50	68.67	-31.10	63.16	33.58	33.58	-9.63
49456.50	68.65	-31.12	63.13	33.55	33.55	-9.70
49455.50	68.63	-31.14	63.10	33.53	33.53	-9.78
49454.50	68.60	-31.17	63.07	33.50	33.50	-9.85
49453.50	68.58	-31.19	63.05	33.48	33.48	-9.93
49452.50	68.56	-31.21	63.01	33.45	33.45	-10.01
49451.50	68.53	-31.23	62.98	33.43	33.43	-10.08
49450.50	68.51	-31.25	62.95	33.40	33.40	-10.16
49449.50	68.49	-31.28	62.92	33.38	33.38	-10.23
49448.50	68.46	-31.30	62.90	33.35	33.35	-10.31
49447.50	68.44	-31.32	62.87	33.33	33.33	-10.38
49446.50	68.42	-31.34	62.84	33.31	33.31	-10.45
49445.50	68.40	-31.36	62.81	33.28	33.28	-10.53
49444.50	68.38	-31.38	62.78	33.26	33.26	-10.60
49443.50	68.36	-31.40	62.76	33.24	33.24	-10.67
49442.50	68.34	-31.42	62.73	33.21	33.21	-10.74
49441.50	68.31	-31.44	62.70	33.19	33.19	-10.82
49440.50	68.29	-31.46	62.67	33.17	33.17	-10.89
49439.50	68.28	-31.48	62.65	33.15	33.15	-10.96
49438.50	68.25	-31.50	62.62	33.12	33.12	-11.03
49437.50	68.23	-31.53	62.59	33.10	33.10	-11.10
49436.50	68.21	-31.55	62.56	33.07	33.07	-11.17
49435.50	68.19	-31.57	62.53	33.05	33.05	-11.25
49434.50	68.16	-31.59	62.50	33.03	33.03	-11.32
49433.50	68.14	-31.61	62.48	33.00	33.00	-11.39
49432.50	68.12	-31.63	62.45	32.98	32.98	-11.46
49431.50	68.10	-31.66	62.42	32.95	32.95	-11.53
49430.50	68.07	-31.68	62.39	32.93	32.93	-11.60
49429.50	68.06	-31.70	62.36	32.91	32.91	-11.67
49428.50	68.04	-31.72	62.34	32.88	32.88	-11.74
49427.50	68.02	-31.74	62.31	32.86	32.86	-11.81
49426.50	67.99	-31.76	62.28	32.84	32.84	-11.88
49425.50	67.97	-31.79	62.25	32.81	32.81	-11.95
49424.50	67.95	-31.81	62.22	32.79	32.79	-12.02
49423.50	67.92	-31.84	62.19	32.76	32.76	-12.09
49422.50	67.90	-31.86	62.16	32.73	32.73	-12.16
49421.50	67.88	-31.89	62.13	32.71	32.71	-12.24
49420.50	67.85	-31.91	62.10	32.68	32.68	-12.31
49419.50	67.83	-31.94	62.07	32.66	32.66	-12.38
49418.50	67.81	-31.96	62.04	32.63	32.63	-12.45
49417.50	67.79	-31.98	62.01	32.61	32.61	-12.52
49416.50	67.77	-32.01	61.99	32.58	32.58	-12.58
49415.50	67.74	-32.03	61.96	32.56	32.56	-12.65
49414.50	67.72	-32.06	61.93	32.53	32.53	-12.72
49413.50	67.70	-32.08	61.90	32.51	32.51	-12.79
49412.50	67.68	-32.10	61.87	32.48	32.48	-12.86
49411.50	67.65	-32.13	61.84	32.45	32.45	-12.93
49410.50	67.63	-32.16	61.81	32.43	32.43	-13.00
49409.50	67.61	-32.18	61.78	32.40	32.40	-13.07
49408.50	67.58	-32.21	61.75	32.38	32.38	-13.14
49407.50	67.56	-32.23	61.72	32.35	32.35	-13.20
49406.50	67.54	-32.26	61.69	32.32	32.32	-13.27
49405.50	67.51	-32.28	61.67	32.30	32.30	-13.34
49404.50	67.49	-32.31	61.64	32.27	32.27	-13.41
49403.50	67.47	-32.33	61.61	32.25	32.25	-13.47
49402.50	67.45	-32.36	61.58	32.23	32.23	-13.53
49401.50	67.43	-32.38	61.56	32.20	32.20	-13.60
49400.50	67.41	-32.40	61.53	32.18	32.18	-13.66
49399.50	67.39	-32.43	61.50	32.16	32.16	-13.73
49398.50	67.37	-32.45	61.48	32.13	32.13	-13.79
49397.50	67.35	-32.47	61.45	32.11	32.11	-13.86
49396.50	67.34	-32.50	61.43	32.09	32.09	-13.92
49395.50	67.32	-32.52	61.40	32.07	32.07	-13.98
49394.50	67.30	-32.54	61.38	32.04	32.04	-14.04
49393.50	67.27	-32.57	61.35	32.02	32.02	-14.11
49392.50	67.25	-32.59	61.32	31.99	31.99	-14.17
49391.50	67.23	-32.62	61.29	31.97	31.97	-14.23
49390.50	67.21	-32.65	61.27	31.94	31.94	-14.30
49389.50	67.19	-32.67	61.24	31.92	31.92	-14.36
49388.50	67.17	-32.70	61.21	31.89	31.89	-14.43
49387.50	67.15	-32.72	61.19	31.87	31.87	-14.48
49386.50	67.13	-32.74	61.16	31.85	31.85	-14.54
49385.50	67.11	-32.77	61.14	31.83	31.83	-14.60
49384.50	67.09	-32.79	61.11	31.80	31.80	-14.67
49383.50	67.07	-32.82	61.08	31.78	31.78	-14.73
49382.50	67.05	-32.85	61.05	31.75	31.75	-14.79
49381.50	67.03	-32.87	61.03	31.73	31.73	-14.86
49380.50	67.01	-32.90	61.00	31.70	31.70	-14.92
49379.50	66.98	-32.93	60.97	31.68	31.68	-14.98
49378.50	66.96	-32.95	60.94	31.65	31.65	-15.04
49377.50	66.94	-32.98	60.92	31.63	31.63	-15.10
49376.50	66.92	-33.00	60.89	31.60	31.60	-15.16
49375.50	66.90	-33.03	60.86	31.58	31.58	-15.22
49374.50	66.88	-33.06	60.83	31.55	31.55	-15.28
49373.50	66.86	-33.09	60.80	31.52	31.52	-15.35
49372.50	66.83	-33.12	60.77	31.50	31.50	-15.41
49371.50	66.81	-33.15	60.75	31.47	31.47	-15.47
49370.50	66.78	-33.18	60.71	31.44	31.44	-15.54
49369.50	66.76	-33.21	60.68	31.41	31.41	-15.60
49368.50	66.74	-33.24	60.66	31.39	31.39	-15.66
49367.50	66.72	-33.27	60.63	31.36	31.36	-15.72
49366.50	66.69	-33.29	60.60	31.33	31.33	-15.78
49365.50	66.67	-33.32	60.57	31.31	31.31	-15.84
49364.50	66.65	-33.35	60.54	31.28	31.28	-15.90
49363.50	66.63	-33.38	60.51	31.25	31.25	-15.96
49362.50	66.61	-33.41	60.49	31.23	31.23	-16.02
49361.50	66.59	-33.43	60.46	31.21	31.21	-16.08
49360.50	66.57	-33.46	60.44	31.18	31.18	-16.13
49359.50	66.55	-33.49	60.41	31.16	31.16	-16.19
49358.50	66.53	-33.52	60.38	31.13	31.13	-16.25
49357.50	66.50	-33.55	60.35	31.10	31.10	-16.31
49356.50	66.48	-33.58	60.33	31.08	31.08	-16.37
49355.50	66.46	-33.61	60.30	31.05	31.05	-16.43
49354.50	66.43	-33.64	60.27	31.02	31.02	-16.49
49353.50	66.41	-33.66	60.24	31.00	31.00	-16.54
49352.50	66.40	-33.69	60.22	30.97	30.97	-16.60
49351.50	66.38	-33.72	60.19	30.95	30.95	-16.65
49350.50	66.35	-33.75	60.16	30.92	30.92	-16.71
49349.50	66.33	-33.78	60.14	30.90	30.90	-16.77
49348.50	66.31	-33.81	60.11	30.87	30.87	-16.82
49347.50	66.29	-33.83	60.08	30.85	30.85	-16.88
49346.50	66.27	-33.86	60.06	30.82	30.82	-16.93
49345.50	66.25	-33.89	60.03	30.80	30.80	-16.99
49344.50	66.23	-33.92	60.01	30.78	30.78	-17.04
49343.50	66.21	-33.95	59.98	30.75	30.75	-17.09
49342.50	66.19	-33.98	59.95	30.72	30.72	-17.15
49341.50	66.17	-34.01	59.93	30.70	30.70	-17.21
49340.50	66.15	-34.04	59.90	30.67	30.67	-17.26
49339.50	66.13	-34.07	59.87	30.65	30.65	-17.31
49338.50	66.11	-34.10	59.85	30.62	30.62	-17.37
49337.50	66.08	-34.13	59.82	30.59	30.59	-17.43
49336.50	66.06	-34.16	59.79	30.56	30.56	-17.48
49335.50	66.04	-34.19	59.76	30.54	30.54	-17.53
49334.50	66.02	-34.22	59.74	30.51	30.51	-17.59
49333.50	66.00	-34.25	59.71	30.49	30.49	-17.64
49332.50	65.98	-34.28	59.68	30.46	30.46	-17.70
49331.50	65.96	-34.31	59.66	30.43	30.43	-17.75
49330.50	65.94	-34.34	59.63	30.41	30.41	-17.80
49329.50	65.91	-34.37	59.61	30.38	30.38	-17.85
49328.50	65.89	-34.40	59.58	30.36	30.36	-17.91
49327.50	65.87	-34.43	59.55	30.33	30.33	-17.96
49326.50	65.85	-34.47	59.52	30.30	30.30	-18.02
49325.50	65.83	-34.49	59.50	30.28	30.28	-18.07
49324.50	65.81	-34.53	59.47	30.25	30.25	-18.12
49323.50	65.79	-34.55	59.45	30.23	30.23	-18.17
49322.50	65.77	-34.59	59.42	30.20	30.20	-18.22
49321.50	65.74	-34.62	59.39	30.17	30.17	-18.27
49320.50	65.72	-34.65	59.37	30.15	30.15	-18.32
49319.50	65.70	-34.68	59.34	30.12	30.12	-18.37
49318.50	65.68	-34.71	59.32	30.10	30.10	-18.42
49317.50	65.66	-34.74	59.29	30.07	30.07	-18.47
49316.50	65.64	-34.78	59.26	30.04	30.04	-18.53
49315.50	65.62	-34.81	59.23	30.01	30.01	-18.58
49314.50	65.60	-34.84	59.21	29.99	29.99	-18.63
49313.50	65.58	-34.86	59.19	29.97	29.97	-18.67
49312.50	65.56	-34.89	59.16	29.94	29.94	-18.72
49311.50	65.54	-34.93	59.14	29.92	29.92	-18.77
49310.50	65.52	-34.96	59.11	29.89	29.89	-18.82
49309.50	65.50	-34.99	59.09	29.87	29.87	-18.87
49308.50	65.48	-35.02	59.06	29.84	29.84	-18.92
49307.50	65.46	-35.05	59.04	29.81	29.81	-18.97
49306.50	65.44	-35.08	59.01	29.79	29.79	-19.01
49305.50	65.41	-35.12	58.98	29.76	29.76	-19.06
49304.50	65.39	-35.15	58.96	29.73	29.73	-19.11
49303.50	65.37	-35.18	58.93	29.71	29.71	-19.16
49302.50	65.35	-35.21	58.90	29.68	29.68	-19.21
49301.50	65.33	-35.24	58.88	29.66	29.66	-19.26
49300.50	65.32	-35.27	58.86	29.63	29.63	-19.30
49299.50	65.29	-35.30	58.83	29.61	29.61	-19.35
49298.50	65.27	-35.33	58.81	29.58	29.58	-19.39
49297.50	65.25	-35.37	58.78	29.55	29.55	-19.44
49296.50	65.23	-35.40	58.76	29.53	29.53	-19.49
49295.50	65.21	-35.43	58.73	29.50	29.50	-19.54
49294.50	65.19	-35.47	58.70	29.47	29.47	-19.58
49293.50	65.17	-35.50	58.68	29.45	29.45	-19.63
49292.50	65.15	-35.53	58.66	29.43	29.43	-19.67
49291.50	65.13	-35.56	58.63	29.40	29.40	-19.72
49290.50	65.11	-35.59	58.61	29.38	29.38	-19.76
49289.50	65.09	-35.63	58.58	29.35	29.35	-19.81
49288.50	65.06	-35.66	58.56	29.32	29.32	-19.86
49287.50	65.04	-35.69	58.53	29.29	29.29	-19.90
49286.50	65.02	-35.73	58.51	29.27	29.27	-19.95
49285.50	65.01	-35.76	58.48	29.25	29.25	-19.99
49284.50	64.99	-35.79	58.46	29.22	29.22	-20.03
49283.50	64.97	-35.82	58.44	29.19	29.19	-20.08
49282.50	64.95	-35.85	58.41	29.17	29.17	-20.12
49281.50	64.93	-35.88	58.39	29.14	29.14	-20.17
49280.50	64.91	-35.92	58.36	29.12	29.12	-20.21
49279.50	64.88	-35.95	58.34	29.09	29.09	-20.25
49278.50	64.87	-35.98	58.32	29.07	29.07	-20.30
49277.50	64.85	-36.01	58.29	29.04	29.04	-20.34
49276.50	64.83	-36.05	58.27	29.02	29.02	-20.38
49275.50	64.81	-36.08	58.24	28.99	28.99	-20.42
49274.50	64.79	-36.11	58.22	28.96	28.96	-20.47
49273.50	64.77	-36.15	58.20	28.94	28.94	-20.51
49272.50	64.74	-36.18	58.17	28.91	28.91	-20.55
49271.50	64.72	-36.21	58.14	28.88	28.88	-20.60
49270.50	64.70	-36.25	58.12	28.86	28.86	-20.64
49269.50	64.68	-36.28	58.10	28.83	28.83	-20.68
49268.50	64.66	-36.32	58.07	28.80	28.80	-20.73
49267.50	64.64	-36.35	58.05	28.78	28.78	-20.77
49266.50	64.62	-36.38	58.03	28.76	28.76	-20.81
49265.50	64.60	-36.41	58.00	28.73	28.73	-20.85
49264.50	64.58	-36.45	57.98	28.70	28.70	-20.89
49263.50	64.56	-36.48	57.95	28.67	28.67	-20.93
49262.50	64.54	-36.52	57.93	28.65	28.65	-20.98
49261.50	64.52	-36.55	57.90	28.62	28.62	-21.02
49260.50	64.50	-36.58	57.88	28.60	28.60	-21.06
49259.50	64.48	-36.62	57.86	28.57	28.57	-21.10
49258.50	64.45	-36.65	57.83	28.54	28.54	-21.14
49257.50	64.43	-36.69	57.81	28.52	28.52	-21.18
49256.50	64.41	-36.72	57.78	28.49	28.49	-21.22
49255.50	64.39	-36.75	57.76	28.47	28.47	-21.26
49254.50	64.37	-36.79	57.74	28.44	28.44	-21.30
49253.50	64.35	-36.82	57.72	28.42	28.42	-21.34
49252.50	64.33	-36.85	57.69	28.39	28.39	-21.37
49251.50	64.32	-36.88	57.67	28.37	28.37	-21.41
49250.50	64.29	-36.92	57.65	28.34	28.34	-21.45
49249.50	64.27	-36.95	57.62	28.31	28.31	-21.49
49248.50	64.25	-36.99	57.60	28.29	28.29	-21.53
49247.50	64.23	-37.02	57.58	28.26	28.26	-21.57
49246.50	64.21	-37.06	57.56	28.24	28.24	-21.61
49245.50	64.19	-37.09	57.53	28.21	28.21	-21.65
49244.50	64.17	-37.13	57.51	28.18	28.18	-21.69
49243.50	64.15	-37.16	57.48	28.16	28.16	-21.72
49242.50	64.12	-37.20	57.46	28.13	28.13	-21.76
49241.50	64.10	-37.23	57.43	28.10	28.10	-21.80
49240.50	64.08	-37.27	57.41	28.07	28.07	-21.84
49239.50	64.06	-37.30	57.39	28.05	28.05	-21.88
49238.50	64.04	-37.34	57.37	28.02	28.02	-21.92
49237.50	64.02	-37.37	57.34	28.00	28.00	-21.95
49236.50	64.00	-37.41	57.32	27.97	27.97	-21.99
49235.50	63.98	-37.44	57.30	27.95	27.95	-22.03
49234.50	63.96	-37.47	57.28	27.92	27.92	-22.06
49233.50	63.94	-37.51	57.25	27.89	27.89	-22.10
49232.50	63.92	-37.54	57.23	27.87	27.87	-22.14
49231.50	63.90	-37.58	57.21	27.84	27.84	-22.17
49230.50	63.88	-37.61	57.19	27.82	27.82	-22.21
49229.50	63.86	-37.65	57.17	27.79	27.79	-22.24
49228.50	63.84	-37.68	57.15	27.77	27.77	-22.28
49227.50	63.82	-37.71	57.13	27.75	27.75	-22.31
49226.50	63.80	-37.74	57.11	27.72	27.72	-22.34
49225.50	63.78	-37.78	57.09	27.70	27.70	-22.38
49224.50	63.76	-37.81	57.07	27.67	27.67	-22.41
49223.50	63.74	-37.85	57.04	27.65	27.65	-22.45
49222.50	63.72	-37.88	57.02	27.62	27.62	-22.48
49221.50	63.70	-37.92	57.00	27.59	27.59	-22.52
49220.50	63.67	-37.96	56.97	27.56	27.56	-22.56
49219.50	63.65	-37.99	56.95	27.54	27.54	-22.59
49218.50	63.63	-38.03	56.93	27.51	27.51	-22.62
49217.50	63.61	-38.06	56.91	27.49	27.49	-22.66
49216.50	63.60	-38.09	56.89	27.47	27.47	-22.69
49215.50	63.58	-38.12	56.87	27.44	27.44	-22.72
49214.50	63.56	-38.16	56.85	27.42	27.42	-22.75
49213.50	63.53	-38.20	56.83	27.39	27.39	-22.79
49212.50	63.51	-38.23	56.81	27.36	27.36	-22.82
49211.50	63.50	-38.26	56.79	27.34	27.34	-22.85
49210.50	63.48	-38.30	56.77	27.32	27.32	-22.88
49209.50	63.45	-38.33	56.75	27.29	27.29	-22.91
49208.50	63.43	-38.37	56.72	27.26	27.26	-22.95
49207.50	63.41	-38.40	56.70	27.24	27.24	-22.98
49206.50	63.39	-38.44	56.68	27.21	27.21	-23.01
49205.50	63.37	-38.47	56.66	27.19	27.19	-23.04
49204.50	63.35	-38.51	56.64	27.16	27.16	-23.08
49203.50	63.33	-38.54	56.62	27.14	27.14	-23.11
49202.50	63.31	-38.57	56.60	27.11	27.11	-23.14
49201.50	63.29	-38.61	56.58	27.09	27.09	-23.17
49200.50	63.27	-38.64	56.56	27.06	27.06	-23.20
49199.50	63.25	-38.67	56.55	27.04	27.04	-23.23
49198.50	63.23	-38.71	56.53	27.02	27.02	-23.26
49197.50	63.21	-38.75	56.50	26.99	26.99	-23.29
49196.50	63.19	-38.78	56.48	26.96	26.96	-23.32
49195.50	63.17	-38.82	56.46	26.94	26.94	-23.35
49194.50	63.15	-38.85	56.44	26.91	26.91	-23.38
49193.50	63.12	-38.89	56.42	26.88	26.88	-23.41
49192.50	63.10	-38.92	56.40	26.86	26.86	-23.44
49191.50	63.08	-38.96	56.38	26.83	26.83	-23.47
49190.50	63.06	-38.99	56.36	26.81	26.81	-23.50
49189.50	63.04	-39.03	56.34	26.78	26.78	-23.53
49188.50	63.02	-39.06	56.32	26.76	26.76	-23.56
49187.50	63.00	-39.10	56.30	26.74	26.74	-23.59
49186.50	62.98	-39.13	56.29	26.71	26.71	-23.62
49185.50	62.96	-39.16	56.27	26.69	26.69	-23.64
49184.50	62.95	-39.20	56.25	26.67	26.67	-23.67
49183.50	62.93	-39.23	56.24	26.65	26.65	-23.69
49182.50	62.91	-39.26	56.22	26.62	26.62	-23.72
49181.50	62.89	-39.30	56.20	26.59	26.59	-23.75
49180.50	62.87	-39.33	56.18	26.57	26.57	-23.78
49179.50	62.85	-39.36	56.16	26.55	26.55	-23.80
49178.50	62.83	-39.40	56.15	26.53	26.53	-23.83
49177.50	62.81	-39.43	56.13	26.50	26.50	-23.86
49176.50	62.79	-39.47	56.11	26.48	26.48	-23.88
49175.50	62.77	-39.50	56.09	26.45	26.45	-23.91
49174.50	62.75	-39.53	56.07	26.43	26.43	-23.93
49173.50	62.73	-39.57	56.05	26.40	26.40	-23.96
49172.50	62.71	-39.60	56.04	26.38	26.38	-23.99
49171.50	62.69	-39.63	56.02	26.36	26.36	-24.01
49170.50	62.67	-39.67	56.00	26.33	26.33	-24.04
49169.50	62.64	-39.71	55.98	26.31	26.31	-24.07
49168.50	62.62	-39.74	55.96	26.28	26.28	-24.09
49167.50	62.60	-39.78	55.94	26.26	26.26	-24.12
49166.50	62.58	-39.81	55.93	26.23	26.23	-24.14
49165.50	62.56	-39.85	55.91	26.21	26.21	-24.17
49164.50	62.54	-39.88	55.89	26.19	26.19	-24.19
49163.50	62.52	-39.91	55.88	26.16	26.16	-24.21
49162.50	62.50	-39.94	55.86	26.14	26.14	-24.24
49161.50	62.48	-39.98	55.84	26.12	26.12	-24.26
49160.50	62.46	-40.01	55.82	26.09	26.09	-24.29
49159.50	62.44	-40.05	55.81	26.07	26.07	-24.31
49158.50	62.42	-40.08	55.79	26.04	26.04	-24.34
49157.50	62.40	-40.12	55.77	26.02	26.02	-24.36
49156.50	62.38	-40.15	55.75	25.99	25.99	-24.38
49155.50	62.36	-40.19	55.74	25.97	25.97	-24.41
49154.50	62.34	-40.22	55.72	25.95	25.95	-24.43
49153.50	62.32	-40.25	55.71	25.93	25.93	-24.45
49152.50	62.30	-40.28	55.69	25.90	25.90	-24.47
49151.50	62.28	-40.32	55.68	25.88	25.88	-24.49
49150.50	62.26	-40.35	55.66	25.86	25.86	-24.51
49149.50	62.25	-40.38	55.65	25.84	25.84	-24.53
49148.50	62.23	-40.41	55.64	25.82	25.82	-24.55
49147.50	62.21	-40.44	55.62	25.80	25.80	-24.57
49146.50	62.19	-40.47	55.61	25.78	25.78	-24.59
49145.50	62.17	-40.51	55.59	25.75	25.75	-24.61
49144.50	62.15	-40.54	55.57	25.73	25.73	-24.63
49143.50	62.13	-40.58	55.56	25.70	25.70	-24.65
49142.50	62.11	-40.61	55.54	25.68	25.68	-24.67
49141.50	62.09	-40.64	55.53	25.66	25.66	-24.69
49140.50	62.07	-40.67	55.52	25.64	25.64	-24.71
49139.50	62.05	-40.70	55.50	25.62	25.62	-24.73
49138.50	62.03	-40.74	55.49	25.59	25.59	-24.75
49137.50	62.01	-40.77	55.47	25.57	25.57	-24.77
49136.50	61.99	-40.81	55.45	25.55	25.55	-24.79
49135.50	61.97	-40.84	55.44	25.52	25.52	-24.81
49134.50	61.95	-40.87	55.42	25.50	25.50	-24.83
49133.50	61.93	-40.90	55.41	25.48	25.48	-24.85
49132.50	61.91	-40.94	55.40	25.46	25.46	-24.86
49131.50	61.90	-40.97	55.38	25.44	25.44	-24.88
49130.50	61.88	-41.00	55.37	25.42	25.42	-24.90
49129.50	61.86	-41.03	55.36	25.39	25.39	-24.92
49128.50	61.84	-41.06	55.35	25.37	25.37	-24.93
49127.50	61.82	-41.09	55.34	25.36	25.36	-24.94
49126.50	61.81	-41.12	55.32	25.34	25.34	-24.96
49125.50	61.79	-41.15	55.31	25.32	25.32	-24.98
49124.50	61.77	-41.18	55.30	25.29	25.29	-24.99
49123.50	61.75	-41.22	55.28	25.27	25.27	-25.01
49122.50	61.73	-41.25	55.27	25.25	25.25	-25.03
49121.50	61.70	-41.29	55.25	25.22	25.22	-25.05
49120.50	61.68	-41.32	55.24	25.20	25.20	-25.06
49119.50	61.66	-41.35	55.22	25.18	25.18	-25.08
49118.50	61.64	-41.38	55.21	25.15	25.15	-25.10
49117.50	61.62	-41.42	55.20	25.13	25.13	-25.11
49116.50	61.60	-41.45	55.18	25.11	25.11	-25.13
49115.50	61.58	-41.48	55.17	25.09	25.09	-25.15
49114.50	61.56	-41.51	55.16	25.07	25.07	-25.16
49113.50	61.54	-41.55	55.14	25.05	25.05	-25.17
49112.50	61.52	-41.57	55.13	25.03	25.03	-25.19
49111.50	61.50	-41.61	55.12	25.00	25.00	-25.20
49110.50	61.48	-41.64	55.11	24.98	24.98	-25.22
49109.50	61.47	-41.67	55.10	24.97	24.97	-25.23
49108.50	61.45	-41.69	55.09	24.95	24.95	-25.24
49107.50	61.43	-41.73	55.07	24.93	24.93	-25.25
49106.50	61.41	-41.76	55.06	24.90	24.90	-25.27
49105.50	61.39	-41.79	55.05	24.88	24.88	-25.28
49104.50	61.37	-41.82	55.04	24.86	24.86	-25.29
49103.50	61.35	-41.85	55.03	24.84	24.84	-25.30
49102.50	61.33	-41.88	55.02	24.82	24.82	-25.32
49101.50	61.31	-41.91	55.00	24.80	24.80	-25.33
49100.50	61.30	-41.94	54.99	24.78	24.78	-25.34
49099.50	61.28	-41.97	54.99	24.76	24.76	-25.35
49098.50	61.26	-42.00	54.98	24.75	24.75	-25.36
49097.50	61.24	-42.03	54.97	24.73	24.73	-25.37
49096.50	61.23	-42.06	54.96	24.71	24.71	-25.38
49095.50	61.21	-42.09	54.95	24.69	24.69	-25.39
49094.50	61.19	-42.11	54.94	24.67	24.67	-25.40
49093.50	61.18	-42.14	54.93	24.66	24.66	-25.40
49092.50	61.16	-42.17	54.92	24.64	24.64	-25.41
49091.50	61.14	-42.20	54.91	24.62	24.62	-25.42
49090.50	61.12	-42.23	54.91	24.60	24.60	-25.43
49089.50	61.10	-42.26	54.90	24.58	24.58	-25.44
49088.50	61.08	-42.29	54.89	24.56	24.56	-25.45
49087.50	61.06	-42.32	54.87	24.54	24.54	-25.46
49086.50	61.04	-42.35	54.86	24.52	24.52	-25.47
49085.50	61.02	-42.38	54.85	24.50	24.50	-25.48
49084.50	61.00	-42.41	54.84	24.48	24.48	-25.49
49083.50	60.98	-42.44	54.83	24.46	24.46	-25.50
49082.50	60.96	-42.47	54.82	24.44	24.44	-25.51
49081.50	60.94	-42.50	54.81	24.42	24.42	-25.52
49080.50	60.92	-42.53	54.80	24.40	24.40	-25.53
49079.50	60.90	-42.56	54.79	24.38	24.38	-25.54
49078.50	60.88	-42.59	54.78	24.36	24.36	-25.55
49077.50	60.86	-42.62	54.77	24.33	24.33	-25.56
49076.50	60.84	-42.65	54.76	24.31	24.31	-25.57
49075.50	60.82	-42.68	54.75	24.30	24.30	-25.57
49074.50	60.80	-42.71	54.74	24.28	24.28	-25.58
49073.50	60.78	-42.74	54.73	24.26	24.26	-25.59
49072.50	60.76	-42.77	54.72	24.24	24.24	-25.60
49071.50	60.74	-42.80	54.71	24.22	24.22	-25.61
49070.50	60.72	-42.83	54.70	24.20	24.20	-25.61
49069.50	60.70	-42.86	54.69	24.18	24.18	-25.62
49068.50	60.68	-42.89	54.68	24.16	24.16	-25.63
49067.50	60.66	-42.91	54.68	24.14	24.14	-25.63
49066.50	60.65	-42.94	54.67	24.13	24.13	-25.63
49065.50	60.63	-42.96	54.67	24.11	24.11	-25.64
49064.50	60.61	-42.99	54.66	24.10	24.10	-25.64
49063.50	60.59	-43.02	54.65	24.08	24.08	-25.65
49062.50	60.57	-43.05	54.64	24.06	24.06	-25.65
49061.50	60.56	-43.07	54.64	24.04	24.04	-25.66
49060.50	60.53	-43.10	54.63	24.02	24.02	-25.67
49059.50	60.52	-43.13	54.62	24.00	24.00	-25.67
49058.50	60.50	-43.16	54.61	23.98	23.98	-25.68
49057.50	60.47	-43.19	54.60	23.96	23.96	-25.68
49056.50	60.46	-43.22	54.60	23.95	23.95	-25.69
49055.50	60.44	-43.24	54.59	23.93	23.93	-25.69
49054.50	60.42	-43.27	54.58	23.91	23.91	-25.70
49053.50	60.40	-43.30	54.57	23.89	23.89	-25.70
49052.50	60.38	-43.32	54.57	23.88	23.88	-25.70
49051.50	60.37	-43.35	54.57	23.86	23.86	-25.70
49050.50	60.35	-43.37	54.56	23.85	23.85	-25.70
49049.50	60.33	-43.40	54.56	23.83	23.83	-25.70
49048.50	60.31	-43.42	54.55	23.82	23.82	-25.71
49047.50	60.29	-43.45	54.55	23.80	23.80	-25.71
49046.50	60.28	-43.48	54.54	23.78	23.78	-25.71
49045.50	60.26	-43.50	54.54	23.77	23.77	-25.71
49044.50	60.24	-43.52	54.53	23.75	23.75	-25.71
49043.50	60.22	-43.55	54.53	23.73	23.73	-25.72
49042.50	60.21	-43.57	54.52	23.72	23.72	-25.72
49041.50	60.19	-43.60	54.52	23.70	23.70	-25.72
49040.50	60.17	-43.63	54.51	23.68	23.68	-25.72
49039.50	60.15	-43.65	54.51	23.67	23.67	-25.72
49038.50	60.14	-43.67	54.51	23.66	23.66	-25.72
49037.50	60.12	-43.69	54.51	23.65	23.65	-25.72
49036.50	60.11	-43.72	54.51	23.63	23.63	-25.72
49035.50	60.09	-43.74	54.50	23.62	23.62	-25.72
49034.50	60.07	-43.77	54.50	23.60	23.60	-25.72
49033.50	60.05	-43.79	54.49	23.58	23.58	-25.72
49032.50	60.03	-43.82	54.49	23.57	23.57	-25.72
49031.50	60.01	-43.84	54.48	23.55	23.55	-25.72
49030.50	59.99	-43.87	54.48	23.53	23.53	-25.73
49029.50	59.97	-43.89	54.48	23.52	23.52	-25.72
49028.50	59.95	-43.92	54.47	23.50	23.50	-25.72
49027.50	59.94	-43.94	54.47	23.49	23.49	-25.73
49026.50	59.92	-43.97	54.46	23.47	23.47	-25.73
49025.50	59.90	-43.99	54.46	23.46	23.46	-25.73
49024.50	59.88	-44.01	54.46	23.44	23.44	-25.73
49023.50	59.87	-44.03	54.46	23.43	23.43	-25.72
49022.50	59.85	-44.05	54.46	23.42	23.42	-25.72
49021.50	59.84	-44.07	54.46	23.41	23.41	-25.71
49020.50	59.82	-44.10	54.45	23.39	23.39	-25.72
49019.50	59.79	-44.12	54.45	23.37	23.37	-25.72
49018.50	59.78	-44.15	54.45	23.36	23.36	-25.72
49017.50	59.76	-44.17	54.44	23.34	23.34	-25.72
49016.50	59.74	-44.19	54.44	23.33	23.33	-25.72
49015.50	59.72	-44.22	54.44	23.31	23.31	-25.71
49014.50	59.70	-44.24	54.44	23.30	23.30	-25.71
49013.50	59.68	-44.26	54.43	23.28	23.28	-25.71
49012.50	59.66	-44.29	54.43	23.27	23.27	-25.71
49011.50	59.64	-44.31	54.43	23.25	23.25	-25.71
49010.50	59.62	-44.33	54.42	23.24	23.24	-25.71
49009.50	59.60	-44.36	54.42	23.22	23.22	-25.71
49008.50	59.58	-44.38	54.42	23.21	23.21	-25.71
49007.50	59.57	-44.40	54.42	23.19	23.19	-25.71
49006.50	59.55	-44.42	54.42	23.18	23.18	-25.70
49005.50	59.53	-44.44	54.42	23.17	23.17	-25.70
49004.50	59.51	-44.46	54.42	23.16	23.16	-25.70
49003.50	59.49	-44.49	54.41	23.14	23.14	-25.70
49002.50	59.47	-44.51	54.41	23.12	23.12	-25.70
49001.50	59.45	-44.53	54.41	23.11	23.11	-25.70
49000.50	59.44	-44.55	54.41	23.10	23.10	-25.70
48999.50	59.42	-44.57	54.41	23.08	23.08	-25.69
48998.50	59.40	-44.60	54.41	23.07	23.07	-25.69
48997.50	59.38	-44.62	54.41	23.06	23.06	-25.69
48996.50	59.37	-44.63	54.41	23.05	23.05	-25.68
48995.50	59.35	-44.65	54.41	23.04	23.04	-25.67
48994.50	59.34	-44.67	54.42	23.03	23.03	-25.67
48993.50	59.32	-44.69	54.42	23.02	23.02	-25.67
48992.50	59.30	-44.71	54.42	23.00	23.00	-25.66
48991.50	59.29	-44.73	54.42	22.99	22.99	-25.66
48990.50	59.27	-44.74	54.42	22.98	22.98	-25.65
48989.50	59.25	-44.76	54.42	22.97	22.97	-25.65
48988.50	59.23	-44.78	54.42	22.96	22.96	-25.65
48987.50	59.21	-44.80	54.42	22.95	22.95	-25.64
48986.50	59.20	-44.82	54.43	22.93	22.93	-25.64
48985.50	59.18	-44.84	54.43	22.92	22.92	-25.64
48984.50	59.16	-44.86	54.43	22.91	22.91	-25.63
48983.50	59.15	-44.88	54.43	22.90	22.90	-25.63
48982.50	59.13	-44.89	54.43	22.89	22.89	-25.62
48981.50	59.11	-44.91	54.43	22.88	22.88	-25.62
48980.50	59.09	-44.93	54.44	22.87	22.87	-25.62
48979.50	59.07	-44.95	54.44	22.85	22.85	-25.61
48978.50	59.06	-44.97	54.44	22.85	22.85	-25.61
48977.50	59.04	-44.98	54.45	22.83	22.83	-25.60
48976.50	59.02	-45.00	54.45	22.82	22.82	-25.60
48975.50	59.01	-45.01	54.46	22.82	22.82	-25.59
48974.50	58.99	-45.03	54.46	22.81	22.81	-25.58
48973.50	58.97	-45.05	54.46	22.79	22.79	-25.58
48972.50	58.96	-45.07	54.46	22.78	22.78	-25.58
48971.50	58.94	-45.08	54.47	22.77	22.77	-25.57
48970.50	58.92	-45.10	54.47	22.76	22.76	-25.57
48969.50	58.90	-45.12	54.47	22.75	22.75	-25.56
48968.50	58.89	-45.13	54.48	22.74	22.74	-25.56
48967.50	58.87	-45.15	54.48	22.73	22.73	-25.55
48966.50	58.85	-45.17	54.49	22.72	22.72	-25.55
48965.50	58.84	-45.18	54.49	22.72	22.72	-25.54
48964.50	58.82	-45.19	54.50	22.71	22.71	-25.54
48963.50	58.80	-45.21	54.50	22.70	22.70	-25.53
48962.50	58.79	-45.23	54.50	22.69	22.69	-25.53
48961.50	58.77	-45.24	54.51	22.68	22.68	-25.52
48960.50	58.75	-45.26	54.51	22.67	22.67	-25.52
48959.50	58.73	-45.27	54.52	22.66	22.66	-25.51
48958.50	58.72	-45.29	54.52	22.65	22.65	-25.51
48957.50	58.70	-45.30	54.53	22.64	22.64	-25.50
48956.50	58.68	-45.32	54.53	22.63	22.63	-25.50
48955.50	58.67	-45.33	54.54	22.63	22.63	-25.49
48954.50	58.65	-45.34	54.55	22.62	22.62	-25.48
48953.50	58.63	-45.36	54.55	22.61	22.61	-25.48
48952.50	58.62	-45.37	54.56	22.60	22.60	-25.47
48951.50	58.60	-45.38	54.57	22.60	22.60	-25.47
48950.50	58.59	-45.40	54.57	22.59	22.59	-25.46
48949.50	58.57	-45.41	54.58	22.58	22.58	-25.46
48948.50	58.55	-45.42	54.59	22.57	22.57	-25.45
48947.50	58.54	-45.43	54.60	22.57	22.57	-25.44
48946.50	58.52	-45.45	54.60	22.56	22.56	-25.44
48945.50	58.51	-45.46	54.61	22.55	22.55	-25.43
48944.50	58.49	-45.47	54.62	22.55	22.55	-25.42
48943.50	58.47	-45.48	54.63	22.54	22.54	-25.42
48942.50	58.46	-45.49	54.63	22.53	22.53	-25.41
48941.50	58.44	-45.50	54.64	22.53	22.53	-25.40
48940.50	58.42	-45.52	54.65	22.52	22.52	-25.40
48939.50	58.41	-45.53	54.65	22.51	22.51	-25.39
48938.50	58.39	-45.54	54.66	22.50	22.50	-25.39
48937.50	58.37	-45.55	54.67	22.50	22.50	-25.38
48936.50	58.36	-45.56	54.68	22.49	22.49	-25.38
48935.50	58.34	-45.57	54.69	22.49	22.49	-25.37
48934.50	58.33	-45.58	54.70	22.48	22.48	-25.36
48933.50	58.31	-45.59	54.71	22.48	22.48	-25.35
48932.50	58.30	-45.60	54.72	22.48	22.48	-25.34
48931.50	58.29	-45.61	54.74	22.47	22.47	-25.34
48930.50	58.27	-45.62	54.75	22.47	22.47	-25.33
48929.50	58.25	-45.63	54.75	22.46	22.46	-25.32
48928.50	58.24	-45.64	54.76	22.46	22.46	-25.32
48927.50	58.22	-45.64	54.78	22.45	22.45	-25.31
48926.50	58.21	-45.65	54.78	22.45	22.45	-25.30
48925.50	58.19	-45.66	54.79	22.44	22.44	-25.30
48924.50	58.18	-45.67	54.81	22.44	22.44	-25.29
48923.50	58.16	-45.68	54.82	22.43	22.43	-25.28
48922.50	58.14	-45.69	54.83	22.43	22.43	-25.28
48921.50	58.13	-45.70	54.84	22.42	22.42	-25.27
48920.50	58.11	-45.71	54.85	22.42	22.42	-25.27
48919.50	58.10	-45.71	54.86	22.41	22.41	-25.26
48918.50	58.08	-45.72	54.87	22.41	22.41	-25.26
48917.50	58.07	-45.73	54.88	22.41	22.41	-25.25
48916.50	58.05	-45.74	54.89	22.40	22.40	-25.24
48915.50	58.04	-45.75	54.91	22.40	22.40	-25.23
48914.50	58.02	-45.75	54.92	22.40	22.40	-25.23
48913.50	58.01	-45.76	54.93	22.39	22.39	-25.22
48912.50	57.99	-45.77	54.95	22.39	22.39	-25.21
48911.50	57.97	-45.77	54.96	22.39	22.39	-25.21
48910.50	57.96	-45.78	54.97	22.38	22.38	-25.20
48909.50	57.94	-45.79	54.98	22.38	22.38	-25.20
48908.50	57.92	-45.80	54.99	22.37	22.37	-25.19
48907.50	57.91	-45.80	55.00	22.37	22.37	-25.19
48906.50	57.89	-45.81	55.02	22.37	22.37	-25.18
48905.50	57.88	-45.82	55.03	22.36	22.36	-25.18
48904.50	57.87	-45.82	55.05	22.37	22.37	-25.17
48903.50	57.86	-45.82	55.07	22.37	22.37	-25.16
48902.50	57.84	-45.83	55.08	22.36	22.36	-25.15
48901.50	57.82	-45.83	55.09	22.36	22.36	-25.14
48900.50	57.81	-45.84	55.11	22.36	22.36	-25.14
48899.50	57.80	-45.84	55.12	22.36	22.36	-25.13
48898.50	57.78	-45.85	55.14	22.36	22.36	-25.12
48897.50	57.76	-45.85	55.15	22.35	22.35	-25.12
48896.50	57.75	-45.86	55.17	22.35	22.35	-25.11
48895.50	57.73	-45.86	55.18	22.35	22.35	-25.11
48894.50	57.72	-45.87	55.19	22.35	22.35	-25.11
48893.50	57.70	-45.87	55.21	22.35	22.35	-25.10
48892.50	57.69	-45.88	55.23	22.35	22.35	-25.09
48891.50	57.67	-45.88	55.24	22.34	22.34	-25.09
48890.50	57.66	-45.88	55.26	22.34	22.34	-25.08
48889.50	57.64	-45.89	55.27	22.34	22.34	-25.08
48888.50	57.63	-45.89	55.29	22.34	22.34	-25.07
48887.50	57.61	-45.89	55.31	22.34	22.34	-25.06
48886.50	57.60	-45.90	55.32	22.34	22.34	-25.06
48885.50	57.58	-45.90	55.34	22.34	22.34	-25.05
48884.50	57.57	-45.90	55.36	22.34	22.34	-25.05
48883.50	57.55	-45.91	55.37	22.34	22.34	-25.04
48882.50	57.54	-45.91	55.39	22.34	22.34	-25.04
48881.50	57.52	-45.91	55.41	22.34	22.34	-25.03
48880.50	57.51	-45.91	55.43	22.34	22.34	-25.02
48879.50	57.50	-45.92	55.44	22.34	22.34	-25.02
48878.50	57.48	-45.92	55.46	22.34	22.34	-25.01
48877.50	57.47	-45.92	55.48	22.35	22.35	-25.01
48876.50	57.46	-45.92	55.51	22.35	22.35	-25.00
48875.50	57.45	-45.92	55.53	22.35	22.35	-24.99
48874.50	57.44	-45.92	55.55	22.35	22.35	-24.98
48873.50	57.42	-45.92	55.56	22.36	22.36	-24.98
48872.50	57.40	-45.92	55.58	22.36	22.36	-24.98
48871.50	57.39	-45.92	55.60	22.36	22.36	-24.97
48870.50	57.38	-45.92	55.62	22.36	22.36	-24.97
48869.50	57.36	-45.92	55.64	22.36	22.36	-24.96
48868.50	57.35	-45.92	55.66	22.36	22.36	-24.95
48867.50	57.34	-45.92	55.68	22.37	22.37	-24.95
48866.50	57.33	-45.92	55.71	22.37	22.37	-24.94
48865.50	57.31	-45.92	55.73	22.37	22.37	-24.93
48864.50	57.30	-45.92	55.75	22.38	22.38	-24.93
48863.50	57.29	-45.92	55.77	22.38	22.38	-24.92
48862.50	57.28	-45.91	55.79	22.39	22.39	-24.92
48861.50	57.27	-45.91	55.82	22.39	22.39	-24.91
48860.50	57.25	-45.91	55.84	22.39	22.39	-24.90
48859.50	57.24	-45.91	55.86	22.40	22.40	-24.90
48858.50	57.23	-45.91	55.88	22.40	22.40	-24.90
48857.50	57.21	-45.91	55.90	22.40	22.40	-24.90
48856.50	57.19	-45.91	55.92	22.40	22.40	-24.89
48855.50	57.18	-45.91	55.94	22.40	22.40	-24.89
48854.50	57.16	-45.91	55.96	22.40	22.40	-24.89
48853.50	57.15	-45.91	55.98	22.41	22.41	-24.88
48852.50	57.14	-45.91	56.01	22.41	22.41	-24.88
48851.50	57.13	-45.91	56.03	22.42	22.42	-24.88
48850.50	57.11	-45.91	56.05	22.42	22.42	-24.87
48849.50	57.10	-45.90	56.07	22.42	22.42	-24.87
48848.50	57.08	-45.90	56.10	22.43	22.43	-24.87
48847.50	57.08	-45.90	56.13	22.44	22.44	-24.86
48846.50	57.07	-45.89	56.15	22.44	22.44	-24.85
48845.50	57.05	-45.89	56.18	22.45	22.45	-24.85
48844.50	57.04	-45.88	56.20	22.45	22.45	-24.85
48843.50	57.03	-45.88	56.23	22.46	22.46	-24.84
48842.50	57.01	-45.88	56.25	22.46	22.46	-24.84
48841.50	57.00	-45.88	56.27	22.47	22.47	-24.84
48840.50	56.99	-45.87	56.30	22.47	22.47	-24.84
48839.50	56.97	-45.87	56.32	22.47	22.47	-24.84
48838.50	56.96	-45.87	56.34	22.48	22.48	-24.83
48837.50	56.95	-45.86	56.37	22.49	22.49	-24.83
48836.50	56.94	-45.86	56.40	22.49	22.49	-24.83
48835.50	56.93	-45.85	56.43	22.50	22.50	-24.82
48834.50	56.92	-45.85	56.45	22.51	22.51	-24.82
48833.50	56.91	-45.84	56.48	22.51	22.51	-24.81
48832.50	56.90	-45.84	56.51	22.52	22.52	-24.81
48831.50	56.89	-45.83	56.54	22.53	22.53	-24.81
48830.50	56.87	-45.83	56.56	22.54	22.54	-24.81
48829.50	56.86	-45.82	56.59	22.54	22.54	-24.81
48828.50	56.85	-45.82	56.62	22.55	22.55	-24.80
48827.50	56.84	-45.81	56.64	22.56	22.56	-24.80
48826.50	56.82	-45.81	56.67	22.56	22.56	-24.80
48825.50	56.81	-45.80	56.70	22.57	22.57	-24.80
48824.50	56.80	-45.80	56.73	22.58	22.58	-24.80
48823.50	56.79	-45.79	56.75	22.58	22.58	-24.80
48822.50	56.78	-45.78	56.78	22.59	22.59	-24.79
48821.50	56.77	-45.78	56.81	22.60	22.60	-24.79
48820.50	56.76	-45.77	56.84	22.61	22.61	-24.79
48819.50	56.75	-45.76	56.87	22.62	22.62	-24.79
48818.50	56.74	-45.76	56.90	22.63	22.63	-24.79
48817.50	56.72	-45.75	56.93	22.63	22.63	-24.79
48816.50	56.71	-45.75	56.95	22.64	22.64	-24.79
48815.50	56.70	-45.74	56.98	22.64	22.64	-24.79
48814.50	56.68	-45.74	57.01	22.65	22.65	-24.79
48813.50	56.67	-45.74	57.03	22.66	22.66	-24.80
48812.50	56.66	-45.73	57.06	22.66	22.66	-24.80
48811.50	56.64	-45.72	57.09	22.67	22.67	-24.80
48810.50	56.63	-45.72	57.12	22.68	22.68	-24.80
48809.50	56.62	-45.71	57.15	22.68	22.68	-24.80
48808.50	56.61	-45.71	57.18	22.69	22.69	-24.80
48807.50	56.60	-45.70	57.21	22.70	22.70	-24.81
48806.50	56.59	-45.69	57.24	22.71	22.71	-24.80
48805.50	56.58	-45.68	57.27	22.73	22.73	-24.80
48804.50	56.57	-45.67	57.30	22.74	22.74	-24.80
48803.50	56.56	-45.66	57.33	22.74	22.74	-24.80
48802.50	56.55	-45.66	57.37	22.75	22.75	-24.80
48801.50	56.54	-45.65	57.40	22.76	22.76	-24.80
48800.50	56.54	-45.63	57.44	22.78	22.78	-24.80
48799.50	56.53	-45.62	57.47	22.79	22.79	-24.80
48798.50	56.52	-45.62	57.50	22.80	22.80	-24.80
48797.50	56.51	-45.60	57.54	22.81	22.81	-24.80
48796.50	56.50	-45.60	57.57	22.82	22.82	-24.80
48795.50	56.49	-45.59	57.60	22.84	22.84	-24.80
48794.50	56.48	-45.58	57.64	22.85	22.85	-24.81
48793.50	56.47	-45.57	57.67	22.86	22.86	-24.81
48792.50	56.46	-45.56	57.70	22.87	22.87	-24.81
48791.50	56.45	-45.55	57.73	22.88	22.88	-24.81
48790.50	56.44	-45.54	57.77	22.89	22.89	-24.82
48789.50	56.43	-45.53	57.80	22.90	22.90	-24.82
48788.50	56.42	-45.52	57.83	22.91	22.91	-24.82
48787.50	56.41	-45.52	57.86	22.92	22.92	-24.83
48786.50	56.40	-45.51	57.90	22.93	22.93	-24.83
48785.50	56.38	-45.50	57.93	22.94	22.94	-24.84
48784.50	56.37	-45.49	57.96	22.94	22.94	-24.85
48783.50	56.36	-45.49	57.99	22.95	22.95	-24.85
48782.50	56.35	-45.48	58.02	22.96	22.96	-24.86
48781.50	56.34	-45.47	58.05	22.97	22.97	-24.86
48780.50	56.33	-45.46	58.09	22.98	22.98	-24.87
48779.50	56.32	-45.45	58.12	23.00	23.00	-24.87
48778.50	56.31	-45.44	58.16	23.01	23.01	-24.88
48777.50	56.30	-45.43	58.19	23.02	23.02	-24.88
48776.50	56.29	-45.43	58.22	23.03	23.03	-24.89
48775.50	56.28	-45.41	58.26	23.04	23.04	-24.89
48774.50	56.27	-45.40	58.30	23.06	23.06	-24.89
48773.50	56.26	-45.39	58.33	23.07	23.07	-24.90
48772.50	56.25	-45.38	58.37	23.08	23.08	-24.90
48771.50	56.24	-45.37	58.40	23.09	23.09	-24.91
48770.50	56.23	-45.36	58.44	23.10	23.10	-24.92
48769.50	56.22	-45.35	58.47	23.11	23.11	-24.93
48768.50	56.21	-45.35	58.50	23.12	23.12	-24.93
48767.50	56.20	-45.34	58.54	23.13	23.13	-24.94
48766.50	56.19	-45.32	58.58	23.15	23.15	-24.94
48765.50	56.18	-45.31	58.62	23.16	23.16	-24.95
48764.50	56.18	-45.30	58.65	23.18	23.18	-24.96
48763.50	56.16	-45.29	58.69	23.19	23.19	-24.97
48762.50	56.15	-45.28	58.72	23.20	23.20	-24.97
48761.50	56.14	-45.27	58.76	23.21	23.21	-24.98
48760.50	56.13	-45.26	58.79	23.22	23.22	-24.99
48759.50	56.12	-45.25	58.83	23.23	23.23	-25.00
48758.50	56.12	-45.24	58.87	23.25	23.25	-25.00
48757.50	56.11	-45.23	58.91	23.26	23.26	-25.01
48756.50	56.10	-45.22	58.94	23.28	23.28	-25.02
48755.50	56.09	-45.21	58.98	23.29	23.29	-25.03
48754.50	56.08	-45.20	59.02	23.30	23.30	-25.03
48753.50	56.07	-45.18	59.06	23.32	23.32	-25.04
48752.50	56.06	-45.17	59.09	23.33	23.33	-25.05
48751.50	56.06	-45.16	59.13	23.34	23.34	-25.06
48750.50	56.05	-45.15	59.17	23.36	23.36	-25.07
48749.50	56.04	-45.14	59.21	23.37	23.37	-25.08
48748.50	56.03	-45.13	59.25	23.38	23.38	-25.08
48747.50	56.03	-45.12	59.29	23.40	23.40	-25.09
48746.50	56.02	-45.10	59.32	23.41	23.41	-25.10
48745.50	56.01	-45.09	59.36	23.43	23.43	-25.11
48744.50	56.00	-45.08	59.40	23.44	23.44	-25.12
48743.50	55.99	-45.07	59.44	23.45	23.45	-25.13
48742.50	55.99	-45.05	59.48	23.47	23.47	-25.13
48741.50	55.98	-45.04	59.52	23.49	23.49	-25.14
48740.50	55.97	-45.03	59.56	23.50	23.50	-25.15
48739.50	55.96	-45.02	59.60	23.51	23.51	-25.17
48738.50	55.95	-45.01	59.64	23.53	23.53	-25.18
48737.50	55.94	-45.00	59.67	23.54	23.54	-25.19
48736.50	55.93	-44.99	59.71	23.55	23.55	-25.20
48735.50	55.93	-44.97	59.76	23.57	23.57	-25.21
48734.50	55.92	-44.96	59.80	23.59	23.59	-25.22
48733.50	55.91	-44.95	59.84	23.60	23.60	-25.23
48732.50	55.91	-44.94	59.88	23.62	23.62	-25.24
48731.50	55.90	-44.92	59.92	23.63	23.63	-25.24
48730.50	55.90	-44.91	59.97	23.65	23.65	-25.25
48729.50	55.89	-44.89	60.01	23.67	23.67	-25.26
48728.50	55.89	-44.88	60.05	23.69	23.69	-25.27
48727.50	55.88	-44.87	60.09	23.70	23.70	-25.28
48726.50	55.88	-44.85	60.13	23.72	23.72	-25.29
48725.50	55.87	-44.84	60.17	23.73	23.73	-25.30
48724.50	55.86	-44.83	60.22	23.75	23.75	-25.32
48723.50	55.85	-44.82	60.26	23.76	23.76	-25.33
48722.50	55.84	-44.81	60.30	23.78	23.78	-25.34
48721.50	55.83	-44.80	60.34	23.79	23.79	-25.36
48720.50	55.83	-44.78	60.38	23.81	23.81	-25.37
48719.50	55.82	-44.77	60.42	23.83	23.83	-25.38
48718.50	55.82	-44.75	60.47	23.84	23.84	-25.39
48717.50	55.81	-44.74	60.51	23.86	23.86	-25.40
48716.50	55.80	-44.73	60.54	23.87	23.87	-25.42
48715.50	55.79	-44.72	60.59	23.89	23.89	-25.43
48714.50	55.79	-44.71	60.63	23.90	23.90	-25.44
48713.50	55.78	-44.69	60.67	23.92	23.92	-25.45
48712.50	55.77	-44.68	60.71	23.93	23.93	-25.47
48711.50	55.76	-44.67	60.75	23.95	23.95	-25.49
48710.50	55.75	-44.66	60.79	23.96	23.96	-25.50
48709.50	55.75	-44.65	60.84	23.98	23.98	-25.51
48708.50	55.74	-44.64	60.88	24.00	24.00	-25.52
48707.50	55.74	-44.62	60.93	24.01	24.01	-25.54
48706.50	55.73	-44.61	60.97	24.03	24.03	-25.55
48705.50	55.73	-44.59	61.02	24.05	24.05	-25.56
48704.50	55.73	-44.58	61.06	24.07	24.07	-25.57
48703.50	55.73	-44.56	61.11	24.09	24.09	-25.58
48702.50	55.72	-44.55	61.16	24.11	24.11	-25.59
48701.50	55.71	-44.53	61.20	24.13	24.13	-25.61
48700.50	55.71	-44.52	61.24	24.14	24.14	-25.62
48699.50	55.70	-44.51	61.29	24.16	24.16	-25.64
48698.50	55.70	-44.50	61.33	24.18	24.18	-25.65
48697.50	55.69	-44.48	61.37	24.19	24.19	-25.67
48696.50	55.68	-44.47	61.42	24.21	24.21	-25.68
48695.50	55.68	-44.46	61.46	24.23	24.23	-25.70
48694.50	55.68	-44.44	61.51	24.25	24.25	-25.71
48693.50	55.67	-44.43	61.55	24.27	24.27	-25.72
48692.50	55.67	-44.41	61.60	24.28	24.28	-25.74
48691.50	55.66	-44.40	61.64	24.30	24.30	-25.75
48690.50	55.65	-44.39	61.69	24.32	24.32	-25.77
48689.50	55.65	-44.38	61.73	24.33	24.33	-25.79
48688.50	55.64	-44.37	61.77	24.35	24.35	-25.81
48687.50	55.63	-44.36	61.81	24.36	24.36	-25.83
48686.50	55.62	-44.35	61.85	24.38	24.38	-25.84
48685.50	55.62	-44.33	61.90	24.39	24.39	-25.86
48684.50	55.61	-44.32	61.94	24.41	24.41	-25.87
48683.50	55.61	-44.31	61.99	24.43	24.43	-25.89
48682.50	55.60	-44.29	62.04	24.45	24.45	-25.90
48681.50	55.60	-44.28	62.09	24.47	24.47	-25.92
48680.50	55.60	-44.26	62.13	24.49	24.49	-25.93
48679.50	55.60	-44.25	62.18	24.51	24.51	-25.95
48678.50	55.60	-44.23	62.23	24.53	24.53	-25.96
48677.50	55.59	-44.22	62.28	24.55	24.55	-25.97
48676.50	55.59	-44.20	62.33	24.57	24.57	-25.99
48675.50	55.58	-44.19	62.37	24.59	24.59	-26.01
48674.50	55.58	-44.18	62.42	24.60	24.60	-26.03
48673.50	55.57	-44.17	62.46	24.62	24.62	-26.05
48672.50	55.56	-44.16	62.50	24.64	24.64	-26.07
48671.50	55.56	-44.15	62.55	24.65	24.65	-26.08
48670.50	55.55	-44.13	62.59	24.67	24.67	-26.10
48669.50	55.55	-44.12	62.64	24.69	24.69	-26.12
48668.50	55.54	-44.11	62.69	24.71	24.71	-26.14
48667.50	55.54	-44.10	62.73	24.72	24.72	-26.16
48666.50	55.53	-44.09	62.77	24.74	24.74	-26.18
48665.50	55.52	-44.07	62.82	24.76	24.76	-26.20
48664.50	55.52	-44.06	62.87	24.78	24.78	-26.21
48663.50	55.52	-44.05	62.92	24.80	24.80	-26.23
48662.50	55.51	-44.03	62.96	24.81	24.81	-26.25
48661.50	55.51	-44.02	63.01	24.83	24.83	-26.27
48660.50	55.50	-44.01	63.06	24.85	24.85	-26.29
48659.50	55.50	-44.00	63.10	24.87	24.87	-26.31
48658.50	55.49	-43.99	63.15	24.88	24.88	-26.33
48657.50	55.49	-43.97	63.19	24.90	24.90	-26.35
48656.50	55.48	-43.96	63.24	24.92	24.92	-26.37
48655.50	55.48	-43.95	63.29	24.94	24.94	-26.39
48654.50	55.47	-43.94	63.33	24.96	24.96	-26.41
48653.50	55.47	-43.92	63.38	24.98	24.98	-26.43
48652.50	55.46	-43.91	63.43	24.99	24.99	-26.45
48651.50	55.46	-43.90	63.48	25.01	25.01	-26.47
48650.50	55.46	-43.89	63.53	25.03	25.03	-26.49
48649.50	55.46	-43.87	63.57	25.05	25.05	-26.51
48648.50	55.45	-43.86	63.62	25.07	25.07	-26.53
48647.50	55.45	-43.85	63.67	25.09	25.09	-26.55
48646.50	55.44	-43.84	63.72	25.11	25.11	-26.57
48645.50	55.44	-43.82	63.77	25.13	25.13	-26.59
48644.50	55.44	-43.81	63.81	25.15	25.15	-26.61
48643.50	55.44	-43.79	63.86	25.17	25.17	-26.62
48642.50	55.43	-43.78	63.91	25.19	25.19	-26.65
48641.50	55.43	-43.77	63.96	25.21	25.21	-26.67
48640.50	55.43	-43.76	64.01	25.23	25.23	-26.69
48639.50	55.42	-43.75	64.05	25.24	25.24	-26.71
48638.50	55.42	-43.73	64.10	25.26	25.26	-26.73
48637.50	55.41	-43.72	64.15	25.28	25.28	-26.75
48636.50	55.41	-43.71	64.20	25.30	25.30	-26.77
48635.50	55.41	-43.70	64.25	25.32	25.32	-26.80
48634.50	55.40	-43.69	64.29	25.33	25.33	-26.82
48633.50	55.40	-43.68	64.34	25.36	25.36	-26.84
48632.50	55.40	-43.66	64.39	25.37	25.37	-26.86
48631.50	55.39	-43.65	64.44	25.39	25.39	-26.88
48630.50	55.39	-43.64	64.49	25.41	25.41	-26.91
48629.50	55.39	-43.63	64.54	25.43	25.43	-26.93
48628.50	55.38	-43.62	64.58	25.45	25.45	-26.95
48627.50	55.38	-43.60	64.63	25.47	25.47	-26.98
48626.50	55.38	-43.59	64.68	25.49	25.49	-27.00
48625.50	55.37	-43.58	64.73	25.51	25.51	-27.02
48624.50	55.37	-43.57	64.78	25.53	25.53	-27.05
48623.50	55.37	-43.56	64.83	25.54	25.54	-27.07
48622.50	55.36	-43.55	64.87	25.56	25.56	-27.10
48621.50	55.36	-43.54	64.92	25.58	25.58	-27.12
48620.50	55.36	-43.53	64.97	25.60	25.60	-27.14
48619.50	55.35	-43.52	65.02	25.62	25.62	-27.17
48618.50	55.35	-43.51	65.07	25.64	25.64	-27.19
48617.50	55.35	-43.49	65.12	25.66	25.66	-27.22
48616.50	55.34	-43.48	65.16	25.67	25.67	-27.24
48615.50	55.34	-43.47	65.21	25.69	25.69	-27.27
48614.50	55.33	-43.46	65.26	25.71	25.71	-27.29
48613.50	55.33	-43.45	65.31	25.73	25.73	-27.32
48612.50	55.33	-43.44	65.36	25.75	25.75	-27.34
48611.50	55.33	-43.43	65.41	25.77	25.77	-27.37
48610.50	55.33	-43.42	65.46	25.79	25.79	-27.39
48609.50	55.32	-43.41	65.51	25.81	25.81	-27.42
48608.50	55.32	-43.39	65.56	25.83	25.83	-27.44
48607.50	55.32	-43.38	65.61	25.85	25.85	-27.47
48606.50	55.32	-43.37	65.65	25.87	25.87	-27.49
48605.50	55.31	-43.36	65.70	25.89	25.89	-27.52
48604.50	55.31	-43.35	65.75	25.91	25.91	-27.54
48603.50	55.31	-43.34	65.80	25.92	25.92	-27.57
48602.50	55.31	-43.33	65.85	25.94	25.94	-27.60
48601.50	55.30	-43.32	65.90	25.96	25.96	-27.62
48600.50	55.30	-43.31	65.95	25.98	25.98	-27.65
48599.50	55.30	-43.30	66.00	26.00	26.00	-27.68
48598.50	55.29	-43.29	66.05	26.02	26.02	-27.71
48597.50	55.29	-43.28	66.09	26.03	26.03	-27.73
48596.50	55.29	-43.27	66.14	26.05	26.05	-27.76
48595.50	55.29	-43.26	66.20	26.08	26.08	-27.78
48594.50	55.29	-43.25	66.25	26.10	26.10	-27.81
48593.50	55.29	-43.24	66.30	26.12	26.12	-27.84
48592.50	55.28	-43.23	66.35	26.13	26.13	-27.87
48591.50	55.28	-43.22	66.40	26.15	26.15	-27.89
48590.50	55.28	-43.20	66.45	26.18	26.18	-27.92
48589.50	55.28	-43.19	66.50	26.20	26.20	-27.95
48588.50	55.28	-43.18	66.55	26.22	26.22	-27.97
48587.50	55.28	-43.17	66.60	26.24	26.24	-28.00
48586.50	55.28	-43.16	66.65	26.25	26.25	-28.03
48585.50	55.27	-43.15	66.70	26.27	26.27	-28.06
48584.50	55.28	-43.14	66.75	26.30	26.30	-28.08
48583.50	55.27	-43.13	66.80	26.32	26.32	-28.11
48582.50	55.27	-43.12	66.85	26.34	26.34	-28.14
48581.50	55.27	-43.11	66.90	26.35	26.35	-28.17
48580.50	55.27	-43.10	66.95	26.37	26.37	-28.20
48579.50	55.26	-43.10	67.00	26.39	26.39	-28.23
48578.50	55.26	-43.09	67.05	26.41	26.41	-28.26
48577.50	55.26	-43.07	67.10	26.43	26.43	-28.29
48576.50	55.27	-43.06	67.16	26.45	26.45	-28.31
48575.50	55.27	-43.05	67.21	26.47	26.47	-28.34
48574.50	55.26	-43.04	67.26	26.49	26.49	-28.37
48573.50	55.26	-43.03	67.31	26.51	26.51	-28.40
48572.50	55.26	-43.02	67.36	26.53	26.53	-28.43
48571.50	55.26	-43.01	67.41	26.55	26.55	-28.46
48570.50	55.26	-43.00	67.46	26.57	26.57	-28.49
48569.50	55.26	-42.99	67.51	26.59	26.59	-28.52
48568.50	55.26	-42.99	67.56	26.61	26.61	-28.55
48567.50	55.25	-42.98	67.61	26.63	26.63	-28.59
48566.50	55.25	-42.97	67.66	26.65	26.65	-28.62
48565.50	55.25	-42.96	67.71	26.67	26.67	-28.65
48564.50	55.25	-42.95	67.76	26.68	26.68	-28.68
48563.50	55.25	-42.94	67.81	26.70	26.70	-28.71
48562.50	55.25	-42.94	67.86	26.72	26.72	-28.74
48561.50	55.25	-42.93	67.91	26.74	26.74	-28.77
48560.50	55.25	-42.92	67.96	26.76	26.76	-28.80
48559.50	55.25	-42.91	68.01	26.79	26.79	-28.83
48558.50	55.25	-42.90	68.06	26.80	26.80	-28.87
48557.50	55.25	-42.89	68.11	26.82	26.82	-28.90
48556.50	55.25	-42.88	68.16	26.84	26.84	-28.93
48555.50	55.25	-42.87	68.21	26.86	26.86	-28.96
48554.50	55.25	-42.86	68.26	26.88	26.88	-28.99
48553.50	55.24	-42.86	68.31	26.90	26.90	-29.03
48552.50	55.24	-42.85	68.36	26.92	26.92	-29.06
48551.50	55.24	-42.84	68.41	26.94	26.94	-29.09
48550.50	55.24	-42.83	68.46	26.96	26.96	-29.13
48549.50	55.24	-42.83	68.51	26.98	26.98	-29.16
48548.50	55.24	-42.82	68.57	27.00	27.00	-29.19
48547.50	55.25	-42.81	68.62	27.02	27.02	-29.22
48546.50	55.24	-42.80	68.66	27.03	27.03	-29.26
48545.50	55.24	-42.80	68.71	27.05	27.05	-29.29
48544.50	55.24	-42.79	68.76	27.07	27.07	-29.32
48543.50	55.24	-42.78	68.82	27.09	27.09	-29.36
48542.50	55.24	-42.77	68.87	27.11	27.11	-29.39
48541.50	55.24	-42.77	68.91	27.13	27.13	-29.43
48540.50	55.24	-42.76	68.96	27.15	27.15	-29.46
48539.50	55.24	-42.75	69.01	27.17	27.17	-29.50
48538.50	55.24	-42.75	69.06	27.18	27.18	-29.53
48537.50	55.24	-42.74	69.11	27.20	27.20	-29.56
48536.50	55.23	-42.74	69.16	27.22	27.22	-29.60
48535.50	55.23	-42.73	69.21	27.24	27.24	-29.64
48534.50	55.23	-42.72	69.26	27.26	27.26	-29.67
48533.50	55.23	-42.72	69.31	27.28	27.28	-29.71
48532.50	55.23	-42.71	69.36	27.30	27.30	-29.74
48531.50	55.24	-42.70	69.42	27.32	27.32	-29.77
48530.50	55.24	-42.69	69.47	27.34	27.34	-29.80
48529.50	55.24	-42.69	69.51	27.36	27.36	-29.84
48528.50	55.23	-42.68	69.56	27.37	27.37	-29.88
48527.50	55.23	-42.68	69.61	27.38	27.38	-29.92
48526.50	55.23	-42.68	69.65	27.40	27.40	-29.96
48525.50	55.23	-42.67	69.70	27.42	27.42	-29.99
48524.50	55.23	-42.67	69.75	27.44	27.44	-30.03
48523.50	55.22	-42.66	69.80	27.45	27.45	-30.07
48522.50	55.22	-42.66	69.84	27.47	27.47	-30.11
48521.50	55.22	-42.66	69.89	27.49	27.49	-30.14
48520.50	55.22	-42.65	69.94	27.50	27.50	-30.18
48519.50	55.22	-42.65	69.99	27.52	27.52	-30.22
48518.50	55.22	-42.64	70.04	27.54	27.54	-30.25
48517.50	55.22	-42.63	70.09	27.56	27.56	-30.29
48516.50	55.23	-42.63	70.15	27.58	27.58	-30.32
48515.50	55.22	-42.62	70.19	27.60	27.60	-30.36
48514.50	55.22	-42.62	70.24	27.62	27.62	-30.40
48513.50	55.22	-42.62	70.29	27.63	27.63	-30.43
48512.50	55.22	-42.61	70.34	27.65	27.65	-30.47
48511.50	55.22	-42.61	70.38	27.66	27.66	-30.51
48510.50	55.22	-42.61	70.43	27.68	27.68	-30.55
48509.50	55.22	-42.60	70.48	27.70	27.70	-30.59
48508.50	55.22	-42.60	70.53	27.72	27.72	-30.63
48507.50	55.22	-42.59	70.58	27.74	27.74	-30.66
48506.50	55.22	-42.59	70.63	27.76	27.76	-30.70
48505.50	55.22	-42.58	70.69	27.78	27.78	-30.73
48504.50	55.23	-42.57	70.74	27.80	27.80	-30.77
48503.50	55.23	-42.57	70.78	27.81	27.81	-30.81
48502.50	55.22	-42.57	70.83	27.83	27.83	-30.85
48501.50	55.22	-42.57	70.88	27.84	27.84	-30.89
48500.50	55.22	-42.56	70.93	27.86	27.86	-30.92
48499.50	55.22	-42.56	70.98	27.88	27.88	-30.96
48498.50	55.22	-42.56	71.02	27.90	27.90	-31.00
48497.50	55.22	-42.55	71.07	27.91	27.91	-31.04
48496.50	55.22	-42.55	71.12	27.93	27.93	-31.08
48495.50	55.23	-42.55	71.17	27.95	27.95	-31.11
48494.50	55.23	-42.54	71.22	27.97	27.97	-31.15
48493.50	55.23	-42.54	71.27	27.99	27.99	-31.19
48492.50	55.23	-42.53	71.32	28.01	28.01	-31.23
48491.50	55.23	-42.54	71.36	28.02	28.02	-31.27
48490.50	55.23	-42.54	71.41	28.03	28.03	-31.31
48489.50	55.23	-42.53	71.46	28.05	28.05	-31.35
48488.50	55.23	-42.53	71.51	28.07	28.07	-31.39
48487.50	55.23	-42.53	71.55	28.08	28.08	-31.43
48486.50	55.23	-42.53	71.60	28.10	28.10	-31.47
48485.50	55.22	-42.53	71.65	28.11	28.11	-31.51
48484.50	55.23	-42.53	71.69	28.13	28.13	-31.55
48483.50	55.23	-42.52	71.74	28.15	28.15	-31.59
48482.50	55.23	-42.52	71.79	28.17	28.17	-31.62
48481.50	55.23	-42.52	71.84	28.18	28.18	-31.66
48480.50	55.23	-42.51	71.89	28.20	28.20	-31.70
48479.50	55.23	-42.51	71.94	28.22	28.22	-31.74
48478.50	55.23	-42.51	71.99	28.24	28.24	-31.78
48477.50	55.23	-42.51	72.03	28.25	28.25	-31.82
48476.50	55.23	-42.51	72.08	28.27	28.27	-31.86
48475.50	55.23	-42.51	72.13	28.28	28.28	-31.90
48474.50	55.23	-42.51	72.17	28.30	28.30	-31.94
48473.50	55.23	-42.51	72.22	28.31	28.31	-31.98
48472.50	55.23	-42.51	72.26	28.33	28.33	-32.02
48471.50	55.23	-42.51	72.31	28.34	28.34	-32.07
48470.50	55.23	-42.52	72.35	28.36	28.36	-32.11
48469.50	55.23	-42.51	72.40	28.37	28.37	-32.15
48468.50	55.23	-42.51	72.45	28.39	28.39	-32.19
48467.50	55.23	-42.52	72.49	28.40	28.40	-32.23
48466.50	55.23	-42.52	72.54	28.42	28.42	-32.27
48465.50	55.23	-42.52	72.58	28.43	28.43	-32.31
48464.50	55.23	-42.52	72.63	28.45	28.45	-32.35
48463.50	55.23	-42.52	72.68	28.46	28.46	-32.39
48462.50	55.23	-42.52	72.72	28.48	28.48	-32.43
48461.50	55.23	-42.52	72.77	28.49	28.49	-32.48
48460.50	55.23	-42.53	72.81	28.50	28.50	-32.52
48459.50	55.23	-42.53	72.86	28.52	28.52	-32.56
48458.50	55.23	-42.53	72.90	28.53	28.53	-32.60
48457.50	55.23	-42.53	72.95	28.55	28.55	-32.64
48456.50	55.23	-42.53	72.99	28.56	28.56	-32.68
48455.50	55.23	-42.53	73.04	28.58	28.58	-32.73
48454.50	55.23	-42.53	73.09	28.59	28.59	-32.76
48453.50	55.23	-42.53	73.13	28.61	28.61	-32.80
48452.50	55.24	-42.53	73.18	28.63	28.63	-32.84
48451.50	55.24	-42.54	73.23	28.64	28.64	-32.88
48450.50	55.24	-42.54	73.27	28.66	28.66	-32.93
48449.50	55.24	-42.54	73.32	28.67	28.67	-32.97
48448.50	55.24	-42.54	73.36	28.69	28.69	-33.01
48447.50	55.24	-42.54	73.41	28.70	28.70	-33.05
48446.50	55.24	-42.55	73.45	28.71	28.71	-33.09
48445.50	55.24	-42.55	73.49	28.72	28.72	-33.14
48444.50	55.23	-42.56	73.53	28.74	28.74	-33.18
48443.50	55.23	-42.56	73.58	28.75	28.75	-33.22
48442.50	55.24	-42.56	73.63	28.77	28.77	-33.26
48441.50	55.24	-42.56	73.67	28.78	28.78	-33.30
48440.50	55.24	-42.56	73.72	28.80	28.80	-33.34
48439.50	55.24	-42.57	73.77	28.81	28.81	-33.38
48438.50	55.25	-42.57	73.81	28.83	28.83	-33.42
48437.50	55.25	-42.57	73.85	28.84	28.84	-33.47
48436.50	55.25	-42.58	73.90	28.86	28.86	-33.51
48435.50	55.25	-42.58	73.94	28.87	28.87	-33.55
48434.50	55.25	-42.58	73.99	28.88	28.88	-33.59
48433.50	55.25	-42.59	74.03	28.90	28.90	-33.63
48432.50	55.25	-42.59	74.08	28.91	28.91	-33.67
48431.50	55.25	-42.60	74.12	28.92	28.92	-33.72
48430.50	55.25	-42.60	74.16	28.94	28.94	-33.76
48429.50	55.25	-42.60	74.21	28.95	28.95	-33.80
48428.50	55.25	-42.61	74.25	28.96	28.96	-33.84
48427.50	55.25	-42.61	74.29	28.98	28.98	-33.88
48426.50	55.25	-42.62	74.33	28.99	28.99	-33.93
48425.50	55.25	-42.62	74.38	29.00	29.00	-33.97
48424.50	55.25	-42.63	74.42	29.02	29.02	-34.01
48423.50	55.25	-42.63	74.46	29.03	29.03	-34.05
48422.50	55.25	-42.64	74.50	29.04	29.04	-34.10
48421.50	55.25	-42.65	74.54	29.05	29.05	-34.14
48420.50	55.26	-42.65	74.59	29.06	29.06	-34.18
48419.50	55.26	-42.65	74.63	29.08	29.08	-34.22
48418.50	55.26	-42.66	74.67	29.09	29.09	-34.27
48417.50	55.25	-42.67	74.71	29.10	29.10	-34.31
48416.50	55.26	-42.68	74.75	29.11	29.11	-34.35
48415.50	55.26	-42.68	74.80	29.12	29.12	-34.40
48414.50	55.25	-42.69	74.84	29.13	29.13	-34.44
48413.50	55.25	-42.70	74.87	29.14	29.14	-34.49
48412.50	55.25	-42.71	74.91	29.15	29.15	-34.53
48411.50	55.25	-42.71	74.95	29.16	29.16	-34.57
48410.50	55.25	-42.72	74.99	29.17	29.17	-34.62
48409.50	55.25	-42.73	75.03	29.18	29.18	-34.66
48408.50	55.25	-42.74	75.07	29.19	29.19	-34.71
48407.50	55.24	-42.75	75.11	29.20	29.20	-34.75
48406.50	55.24	-42.76	75.15	29.21	29.21	-34.79
48405.50	55.24	-42.76	75.18	29.22	29.22	-34.84
48404.50	55.24	-42.77	75.22	29.23	29.23	-34.88
48403.50	55.24	-42.78	75.27	29.24	29.24	-34.93
48402.50	55.24	-42.79	75.30	29.25	29.25	-34.97
48401.50	55.24	-42.79	75.35	29.26	29.26	-35.01
48400.50	55.24	-42.80	75.39	29.28	29.28	-35.05
48399.50	55.24	-42.81	75.43	29.29	29.29	-35.10
48398.50	55.24	-42.82	75.46	29.29	29.29	-35.14
48397.50	55.24	-42.83	75.50	29.30	29.30	-35.19
48396.50	55.24	-42.84	75.54	29.31	29.31	-35.23
48395.50	55.24	-42.84	75.58	29.33	29.33	-35.27
48394.50	55.24	-42.85	75.62	29.34	29.34	-35.31
48393.50	55.24	-42.86	75.66	29.35	29.35	-35.36
48392.50	55.24	-42.87	75.70	29.36	29.36	-35.40
48391.50	55.24	-42.88	75.74	29.37	29.37	-35.44
48390.50	55.24	-42.89	75.77	29.38	29.38	-35.49
48389.50	55.24	-42.90	75.81	29.39	29.39	-35.53
48388.50	55.24	-42.90	75.85	29.39	29.39	-35.57
48387.50	55.24	-42.91	75.89	29.40	29.40	-35.62
48386.50	55.24	-42.92	75.92	29.41	29.41	-35.66
48385.50	55.24	-42.93	75.96	29.42	29.42	-35.71
48384.50	55.24	-42.94	76.00	29.43	29.43	-35.75
48383.50	55.24	-42.95	76.03	29.44	29.44	-35.80
48382.50	55.24	-42.96	76.07	29.45	29.45	-35.84
48381.50	55.24	-42.97	76.11	29.46	29.46	-35.88
48380.50	55.24	-42.98	76.15	29.47	29.47	-35.92
48379.50	55.24	-42.99	76.19	29.48	29.48	-35.97
48378.50	55.23	-43.00	76.22	29.48	29.48	-36.01
48377.50	55.23	-43.02	76.25	29.49	29.49	-36.06
48376.50	55.23	-43.03	76.29	29.50	29.50	-36.10
48375.50	55.23	-43.04	76.32	29.51	29.51	-36.15
48374.50	55.23	-43.05	76.36	29.51	29.51	-36.19
48373.50	55.23	-43.06	76.39	29.52	29.52	-36.24
48372.50	55.23	-43.07	76.43	29.53	29.53	-36.28
48371.50	55.22	-43.08	76.46	29.53	29.53	-36.33
48370.50	55.22	-43.09	76.50	29.54	29.54	-36.37
48369.50	55.22	-43.10	76.53	29.55	29.55	-36.41
48368.50	55.22	-43.12	76.57	29.56	29.56	-36.46
48367.50	55.22	-43.13	76.60	29.56	29.56	-36.50
48366.50	55.21	-43.14	76.63	29.57	29.57	-36.55
48365.50	55.21	-43.16	76.66	29.57	29.57	-36.60
48364.50	55.21	-43.17	76.69	29.58	29.58	-36.64
48363.50	55.20	-43.19	76.72	29.58	29.58	-36.69
48362.50	55.20	-43.20	76.76	29.59	29.59	-36.73
48361.50	55.21	-43.21	76.79	29.60	29.60	-36.77
48360.50	55.21	-43.22	76.83	29.60	29.60	-36.82
48359.50	55.21	-43.23	76.87	29.62	29.62	-36.86
48358.50	55.21	-43.24	76.90	29.62	29.62	-36.90
48357.50	55.21	-43.25	76.93	29.63	29.63	-36.94
48356.50	55.21	-43.26	76.97	29.64	29.64	-36.99
48355.50	55.21	-43.27	77.00	29.64	29.64	-37.03
48354.50	55.21	-43.28	77.03	29.65	29.65	-37.07
48353.50	55.21	-43.30	77.07	29.66	29.66	-37.12
48352.50	55.21	-43.31	77.10	29.67	29.67	-37.16
48351.50	55.20	-43.32	77.13	29.67	29.67	-37.21
48350.50	55.20	-43.34	77.16	29.67	29.67	-37.25
48349.50	55.19	-43.36	77.18	29.67	29.67	-37.30
48348.50	55.19	-43.37	77.21	29.68	29.68	-37.35
48347.50	55.19	-43.38	77.25	29.68	29.68	-37.39
48346.50	55.19	-43.40	77.28	29.69	29.69	-37.43
48345.50	55.19	-43.41	77.31	29.70	29.70	-37.47
48344.50	55.19	-43.42	77.35	29.71	29.71	-37.52
48343.50	55.19	-43.43	77.38	29.72	29.72	-37.56
48342.50	55.20	-43.44	77.41	29.72	29.72	-37.60
48341.50	55.20	-43.45	77.45	29.73	29.73	-37.64
48340.50	55.20	-43.46	77.48	29.74	29.74	-37.68
48339.50	55.20	-43.47	77.51	29.75	29.75	-37.73
48338.50	55.20	-43.48	77.54	29.75	29.75	-37.77
48337.50	55.20	-43.49	77.58	29.76	29.76	-37.81
48336.50	55.20	-43.50	77.61	29.77	29.77	-37.85
48335.50	55.21	-43.52	77.65	29.78	29.78	-37.89
48334.50	55.20	-43.53	77.67	29.78	29.78	-37.94
48333.50	55.20	-43.55	77.70	29.78	29.78	-37.98
48332.50	55.19	-43.57	77.72	29.78	29.78	-38.03
48331.50	55.19	-43.58	77.75	29.79	29.79	-38.07
48330.50	55.19	-43.60	77.78	29.79	29.79	-38.12
48329.50	55.19	-43.61	77.81	29.79	29.79	-38.16
48328.50	55.19	-43.62	77.84	29.80	29.80	-38.20
48327.50	55.19	-43.64	77.87	29.81	29.81	-38.25
48326.50	55.18	-43.65	77.89	29.81	29.81	-38.29
48325.50	55.18	-43.67	77.92	29.81	29.81	-38.33
48324.50	55.18	-43.68	77.95	29.81	29.81	-38.38
48323.50	55.17	-43.70	77.97	29.82	29.82	-38.42
48322.50	55.17	-43.71	78.00	29.82	29.82	-38.47
48321.50	55.17	-43.73	78.03	29.82	29.82	-38.51
48320.50	55.17	-43.74	78.05	29.83	29.83	-38.55
48319.50	55.17	-43.75	78.08	29.83	29.83	-38.59
48318.50	55.17	-43.77	78.11	29.84	29.84	-38.64
48317.50	55.17	-43.78	78.14	29.84	29.84	-38.68
48316.50	55.17	-43.79	78.17	29.85	29.85	-38.72
48315.50	55.17	-43.81	78.19	29.85	29.85	-38.76
48314.50	55.16	-43.83	78.22	29.85	29.85	-38.81
48313.50	55.16	-43.84	78.24	29.85	29.85	-38.85
48312.50	55.16	-43.86	78.27	29.86	29.86	-38.90
48311.50	55.16	-43.87	78.29	29.86	29.86	-38.94
48310.50	55.16	-43.89	78.32	29.86	29.86	-38.98
48309.50	55.15	-43.90	78.34	29.86	29.86	-39.02
48308.50	55.15	-43.92	78.37	29.87	29.87	-39.07
48307.50	55.15	-43.94	78.39	29.87	29.87	-39.11
48306.50	55.15	-43.95	78.41	29.87	29.87	-39.16
48305.50	55.15	-43.97	78.44	29.87	29.87	-39.20
48304.50	55.14	-43.98	78.46	29.87	29.87	-39.24
48303.50	55.14	-44.00	78.49	29.88	29.88	-39.28
48302.50	55.14	-44.02	78.51	29.88	29.88	-39.33
48301.50	55.14	-44.03	78.54	29.88	29.88	-39.37
48300.50	55.13	-44.05	78.56	29.88	29.88	-39.41
48299.50	55.13	-44.06	78.58	29.88	29.88	-39.45
48298.50	55.13	-44.08	78.61	29.89	29.89	-39.50
48297.50	55.13	-44.09	78.64	29.89	29.89	-39.54
48296.50	55.13	-44.11	78.66	29.89	29.89	-39.58
48295.50	55.13	-44.12	78.68	29.89	29.89	-39.62
48294.50	55.13	-44.14	78.70	29.90	29.90	-39.66
48293.50	55.12	-44.16	78.73	29.90	29.90	-39.71
48292.50	55.12	-44.17	78.75	29.90	29.90	-39.75
48291.50	55.12	-44.19	78.77	29.90	29.90	-39.79
48290.50	55.12	-44.20	78.79	29.90	29.90	-39.83
48289.50	55.11	-44.22	78.82	29.90	29.90	-39.87
48288.50	55.11	-44.24	78.84	29.90	29.90	-39.92
48287.50	55.11	-44.25	78.86	29.90	29.90	-39.96
48286.50	55.11	-44.27	78.88	29.91	29.91	-40.00
48285.50	55.10	-44.29	78.90	29.90	29.90	-40.04
48284.50	55.10	-44.31	78.92	29.90	29.90	-40.09
48283.50	55.09	-44.32	78.94	29.90	29.90	-40.13
48282.50	55.09	-44.34	78.96	29.90	29.90	-40.17
48281.50	55.09	-44.36	78.98	29.90	29.90	-40.22
48280.50	55.08	-44.38	79.00	29.90	29.90	-40.26
48279.50	55.07	-44.40	79.01	29.90	29.90	-40.30
48278.50	55.07	-44.41	79.03	29.90	29.90	-40.34
48277.50	55.07	-44.43	79.06	29.90	29.90	-40.39
48276.50	55.07	-44.45	79.08	29.90	29.90	-40.43
48275.50	55.07	-44.46	79.10	29.90	29.90	-40.47
48274.50	55.06	-44.48	79.11	29.90	29.90	-40.51
48273.50	55.06	-44.50	79.13	29.90	29.90	-40.55
48272.50	55.05	-44.52	79.15	29.90	29.90	-40.59
48271.50	55.05	-44.53	79.17	29.90	29.90	-40.64
48270.50	55.05	-44.55	79.19	29.90	29.90	-40.68
48269.50	55.05	-44.57	79.21	29.90	29.90	-40.72
48268.50	55.04	-44.58	79.23	29.90	29.90	-40.76
48267.50	55.04	-44.60	79.25	29.90	29.90	-40.80
48266.50	55.04	-44.62	79.27	29.89	29.89	-40.84
48265.50	55.03	-44.64	79.29	29.89	29.89	-40.88
48264.50	55.03	-44.65	79.30	29.89	29.89	-40.92
48263.50	55.03	-44.67	79.33	29.90	29.90	-40.96
48262.50	55.03	-44.68	79.34	29.90	29.90	-41.00
48261.50	55.02	-44.70	79.36	29.89	29.89	-41.04
48260.50	55.02	-44.72	79.37	29.89	29.89	-41.08
48259.50	55.01	-44.74	79.39	29.89	29.89	-41.13
48258.50	55.01	-44.76	79.41	29.89	29.89	-41.17
48257.50	55.01	-44.78	79.43	29.89	29.89	-41.21
48256.50	55.00	-44.79	79.44	29.88	29.88	-41.25
48255.50	55.00	-44.81	79.46	29.88	29.88	-41.29
48254.50	54.99	-44.83	79.47	29.88	29.88	-41.33
48253.50	54.99	-44.85	79.49	29.87	29.87	-41.37
48252.50	54.98	-44.87	79.50	29.87	29.87	-41.42
48251.50	54.97	-44.90	79.51	29.86	29.86	-41.46
48250.50	54.96	-44.91	79.52	29.86	29.86	-41.50
48249.50	54.96	-44.93	79.54	29.86	29.86	-41.54
48248.50	54.96	-44.95	79.56	29.86	29.86	-41.58
48247.50	54.96	-44.96	79.57	29.86	29.86	-41.62
48246.50	54.95	-44.98	79.59	29.86	29.86	-41.66
48245.50	54.95	-44.99	79.61	29.86	29.86	-41.70
48244.50	54.95	-45.01	79.63	29.86	29.86	-41.73
48243.50	54.95	-45.03	79.64	29.86	29.86	-41.77
48242.50	54.95	-45.04	79.66	29.85	29.85	-41.81
48241.50	54.94	-45.06	79.67	29.85	29.85	-41.85
48240.50	54.94	-45.08	79.69	29.85	29.85	-41.89
48239.50	54.94	-45.09	79.70	29.85	29.85	-41.93
48238.50	54.93	-45.11	79.72	29.85	29.85	-41.96
48237.50	54.93	-45.13	79.74	29.85	29.85	-42.00
48236.50	54.93	-45.14	79.75	29.85	29.85	-42.04
48235.50	54.92	-45.16	79.77	29.84	29.84	-42.08
48234.50	54.92	-45.18	79.78	29.84	29.84	-42.12
48233.50	54.92	-45.20	79.80	29.84	29.84	-42.16
48232.50	54.92	-45.21	79.82	29.84	29.84	-42.19
48231.50	54.92	-45.22	79.84	29.84	29.84	-42.22
48230.50	54.92	-45.23	79.85	29.85	29.85	-42.26
48229.50	54.91	-45.25	79.87	29.84	29.84	-42.30
48228.50	54.91	-45.27	79.87	29.83	29.83	-42.34
48227.50	54.90	-45.29	79.89	29.83	29.83	-42.38
48226.50	54.90	-45.31	79.90	29.83	29.83	-42.41
48225.50	54.89	-45.32	79.91	29.83	29.83	-42.45
48224.50	54.89	-45.34	79.93	29.82	29.82	-42.49
48223.50	54.89	-45.36	79.94	29.82	29.82	-42.53
48222.50	54.88	-45.38	79.95	29.82	29.82	-42.57
48221.50	54.88	-45.40	79.96	29.81	29.81	-42.61
48220.50	54.87	-45.41	79.97	29.81	29.81	-42.65
48219.50	54.87	-45.43	79.98	29.81	29.81	-42.68
48218.50	54.86	-45.45	79.99	29.80	29.80	-42.73
48217.50	54.85	-45.47	80.00	29.79	29.79	-42.76
48216.50	54.85	-45.49	80.02	29.79	29.79	-42.80
48215.50	54.84	-45.50	80.03	29.79	29.79	-42.84
48214.50	54.84	-45.52	80.04	29.79	29.79	-42.87
48213.50	54.84	-45.54	80.05	29.78	29.78	-42.91
48212.50	54.83	-45.56	80.06	29.78	29.78	-42.95
48211.50	54.83	-45.57	80.07	29.77	29.77	-42.99
48210.50	54.82	-45.59	80.08	29.77	29.77	-43.03
48209.50	54.81	-45.61	80.09	29.76	29.76	-43.06
48208.50	54.81	-45.63	80.10	29.76	29.76	-43.10
48207.50	54.80	-45.65	80.11	29.76	29.76	-43.14
48206.50	54.80	-45.67	80.12	29.75	29.75	-43.18
48205.50	54.79	-45.68	80.13	29.75	29.75	-43.21
48204.50	54.79	-45.70	80.14	29.75	29.75	-43.25
48203.50	54.79	-45.71	80.15	29.74	29.74	-43.28
48202.50	54.78	-45.73	80.16	29.74	29.74	-43.32
48201.50	54.78	-45.75	80.17	29.73	29.73	-43.36
48200.50	54.77	-45.76	80.18	29.73	29.73	-43.39
48199.50	54.77	-45.78	80.19	29.72	29.72	-43.43
48198.50	54.76	-45.80	80.20	29.72	29.72	-43.47
48197.50	54.76	-45.82	80.21	29.72	29.72	-43.50
48196.50	54.75	-45.83	80.22	29.71	29.71	-43.54
48195.50	54.75	-45.85	80.23	29.71	29.71	-43.57
48194.50	54.74	-45.86	80.24	29.71	29.71	-43.61
48193.50	54.73	-45.88	80.24	29.70	29.70	-43.65
48192.50	54.73	-45.90	80.25	29.69	29.69	-43.69
48191.50	54.72	-45.92	80.25	29.69	29.69	-43.72
48190.50	54.72	-45.94	80.26	29.68	29.68	-43.76
48189.50	54.71	-45.95	80.27	29.68	29.68	-43.79
48188.50	54.71	-45.97	80.28	29.67	29.67	-43.83
48187.50	54.70	-45.98	80.29	29.67	29.67	-43.86
48186.50	54.70	-46.00	80.30	29.66	29.66	-43.90
48185.50	54.69	-46.02	80.31	29.66	29.66	-43.93
48184.50	54.69	-46.03	80.31	29.66	29.66	-43.97
48183.50	54.68	-46.05	80.32	29.65	29.65	-44.00
48182.50	54.68	-46.06	80.33	29.65	29.65	-44.04
48181.50	54.68	-46.08	80.34	29.65	29.65	-44.07
48180.50	54.68	-46.09	80.36	29.65	29.65	-44.10
48179.50	54.67	-46.11	80.36	29.64	29.64	-44.13
48178.50	54.66	-46.12	80.37	29.64	29.64	-44.17
48177.50	54.66	-46.14	80.37	29.63	29.63	-44.21
48176.50	54.65	-46.16	80.38	29.62	29.62	-44.24
48175.50	54.64	-46.18	80.38	29.62	29.62	-44.28
48174.50	54.64	-46.19	80.39	29.61	29.61	-44.31
48173.50	54.63	-46.21	80.39	29.61	29.61	-44.35
48172.50	54.63	-46.23	80.40	29.60	29.60	-44.38
48171.50	54.62	-46.24	80.40	29.59	29.59	-44.42
48170.50	54.61	-46.26	80.41	29.59	29.59	-44.45
48169.50	54.61	-46.27	80.42	29.59	29.59	-44.49
48168.50	54.61	-46.29	80.43	29.58	29.58	-44.52
48167.50	54.60	-46.30	80.43	29.58	29.58	-44.55
48166.50	54.60	-46.31	80.44	29.58	29.58	-44.58
48165.50	54.60	-46.33	80.45	29.57	29.57	-44.62
48164.50	54.60	-46.34	80.46	29.57	29.57	-44.64
48163.50	54.59	-46.35	80.47	29.57	29.57	-44.68
48162.50	54.59	-46.37	80.48	29.57	29.57	-44.71
48161.50	54.58	-46.38	80.48	29.56	29.56	-44.74
48160.50	54.58	-46.40	80.49	29.56	29.56	-44.78
48159.50	54.57	-46.41	80.49	29.55	29.55	-44.81
48158.50	54.57	-46.43	80.50	29.54	29.54	-44.84
48157.50	54.56	-46.45	80.50	29.54	29.54	-44.88
48156.50	54.55	-46.46	80.50	29.53	29.53	-44.91
48155.50	54.55	-46.48	80.51	29.52	29.52	-44.95
48154.50	54.54	-46.49	80.51	29.52	29.52	-44.98
48153.50	54.53	-46.51	80.52	29.51	29.51	-45.01
48152.50	54.53	-46.52	80.52	29.51	29.51	-45.04
48151.50	54.52	-46.54	80.52	29.50	29.50	-45.08
48150.50	54.52	-46.55	80.53	29.50	29.50	-45.11
48149.50	54.51	-46.57	80.53	29.49	29.49	-45.15
48148.50	54.50	-46.59	80.53	29.48	29.48	-45.18
48147.50	54.50	-46.60	80.53	29.48	29.48	-45.21
48146.50	54.49	-46.62	80.54	29.47	29.47	-45.25
48145.50	54.48	-46.63	80.54	29.46	29.46	-45.28
48144.50	54.48	-46.65	80.54	29.46	29.46	-45.31
48143.50	54.47	-46.66	80.55	29.45	29.45	-45.35
48142.50	54.46	-46.67	80.55	29.45	29.45	-45.38
48141.50	54.46	-46.69	80.56	29.44	29.44	-45.41
48140.50	54.46	-46.70	80.56	29.44	29.44	-45.44
48139.50	54.46	-46.71	80.57	29.44	29.44	-45.47
48138.50	54.45	-46.72	80.57	29.44	29.44	-45.50
48137.50	54.44	-46.74	80.58	29.43	29.43	-45.53
48136.50	54.43	-46.76	80.57	29.42	29.42	-45.57
48135.50	54.42	-46.78	80.57	29.40	29.40	-45.60
48134.50	54.41	-46.79	80.57	29.40	29.40	-45.64
48133.50	54.41	-46.80	80.57	29.39	29.39	-45.67
48132.50	54.41	-46.82	80.58	29.39	29.39	-45.70
48131.50	54.40	-46.83	80.58	29.39	29.39	-45.73
48130.50	54.40	-46.84	80.59	29.38	29.38	-45.76
48129.50	54.39	-46.85	80.59	29.38	29.38	-45.79
48128.50	54.38	-46.87	80.59	29.37	29.37	-45.82
48127.50	54.38	-46.88	80.59	29.36	29.36	-45.86
48126.50	54.37	-46.90	80.59	29.35	29.35	-45.89
48125.50	54.36	-46.91	80.59	29.35	29.35	-45.92
48124.50	54.36	-46.93	80.59	29.34	29.34	-45.95
48123.50	54.35	-46.94	80.59	29.33	29.33	-45.99
48122.50	54.34	-46.96	80.59	29.32	29.32	-46.02
48121.50	54.33	-46.97	80.59	29.32	29.32	-46.05
48120.50	54.33	-46.98	80.59	29.31	29.31	-46.08
48119.50	54.32	-47.00	80.59	29.30	29.30	-46.11
48118.50	54.32	-47.01	80.59	29.30	29.30	-46.14
48117.50	54.31	-47.02	80.60	29.29	29.29	-46.17
48116.50	54.30	-47.04	80.60	29.29	29.29	-46.21
48115.50	54.30	-47.05	80.60	29.28	29.28	-46.24
48114.50	54.29	-47.06	80.60	29.28	29.28	-46.27
48113.50	54.29	-47.07	80.60	29.27	29.27	-46.30
48112.50	54.28	-47.08	80.60	29.27	29.27	-46.33
48111.50	54.27	-47.10	80.60	29.26	29.26	-46.36
48110.50	54.27	-47.11	80.60	29.25	29.25	-46.39
48109.50	54.26	-47.12	80.60	29.25	29.25	-46.42
48108.50	54.25	-47.14	80.60	29.24	29.24	-46.45
48107.50	54.24	-47.15	80.60	29.23	29.23	-46.49
48106.50	54.24	-47.17	80.60	29.22	29.22	-46.52
48105.50	54.23	-47.18	80.59	29.22	29.22	-46.55
48104.50	54.22	-47.20	80.59	29.20	29.20	-46.58
48103.50	54.21	-47.21	80.59	29.20	29.20	-46.61
48102.50	54.21	-47.22	80.59	29.20	29.20	-46.64
48101.50	54.21	-47.23	80.59	29.19	29.19	-46.67
48100.50	54.20	-47.24	80.59	29.18	29.18	-46.70
48099.50	54.19	-47.25	80.59	29.18	29.18	-46.73
48098.50	54.18	-47.27	80.59	29.17	29.17	-46.77
48097.50	54.18	-47.28	80.59	29.16	29.16	-46.79
48096.50	54.18	-47.29	80.59	29.16	29.16	-46.82
48095.50	54.17	-47.30	80.59	29.16	29.16	-46.85
48094.50	54.16	-47.31	80.59	29.15	29.15	-46.88
48093.50	54.16	-47.32	80.59	29.14	29.14	-46.91
48092.50	54.15	-47.33	80.59	29.14	29.14	-46.94
48091.50	54.14	-47.34	80.59	29.13	29.13	-46.97
48090.50	54.14	-47.36	80.58	29.12	29.12	-47.01
48089.50	54.13	-47.37	80.58	29.11	29.11	-47.04
48088.50	54.12	-47.38	80.58	29.11	29.11	-47.07
48087.50	54.11	-47.39	80.58	29.10	29.10	-47.10
48086.50	54.11	-47.41	80.58	29.09	29.09	-47.13
48085.50	54.10	-47.42	80.57	29.09	29.09	-47.16
48084.50	54.09	-47.43	80.57	29.08	29.08	-47.19
48083.50	54.09	-47.44	80.57	29.07	29.07	-47.22
48082.50	54.08	-47.45	80.56	29.06	29.06	-47.25
48081.50	54.07	-47.47	80.56	29.05	29.05	-47.28
48080.50	54.06	-47.48	80.55	29.05	29.05	-47.31
48079.50	54.05	-47.49	80.55	29.04	29.04	-47.35
48078.50	54.04	-47.51	80.54	29.03	29.03	-47.38
48077.50	54.04	-47.52	80.54	29.02	29.02	-47.41
48076.50	54.03	-47.53	80.54	29.01	29.01	-47.44
48075.50	54.02	-47.54	80.53	29.01	29.01	-47.47
48074.50	54.02	-47.55	80.53	29.00	29.00	-47.50
48073.50	54.01	-47.56	80.53	28.99	28.99	-47.53
48072.50	54.00	-47.57	80.52	28.98	28.98	-47.56
48071.50	54.00	-47.58	80.52	28.98	28.98	-47.59
48070.50	53.99	-47.60	80.51	28.97	28.97	-47.62
48069.50	53.98	-47.61	80.51	28.96	28.96	-47.66
48068.50	53.97	-47.62	80.51	28.95	28.95	-47.69
48067.50	53.96	-47.63	80.50	28.95	28.95	-47.72
48066.50	53.96	-47.64	80.50	28.94	28.94	-47.75
48065.50	53.95	-47.65	80.49	28.93	28.93	-47.78
48064.50	53.94	-47.66	80.49	28.92	28.92	-47.81
48063.50	53.94	-47.67	80.49	28.92	28.92	-47.84
48062.50	53.93	-47.68	80.48	28.91	28.91	-47.87
48061.50	53.92	-47.69	80.48	28.90	28.90	-47.90
48060.50	53.91	-47.70	80.47	28.89	28.89	-47.93
48059.50	53.90	-47.71	80.47	28.89	28.89	-47.96
48058.50	53.90	-47.72	80.46	28.88	28.88	-47.99
48057.50	53.89	-47.73	80.46	28.87	28.87	-48.02
48056.50	53.88	-47.75	80.45	28.86	28.86	-48.05
48055.50	53.87	-47.76	80.44	28.85	28.85	-48.09
48054.50	53.87	-47.77	80.44	28.85	28.85	-48.11
48053.50	53.86	-47.78	80.43	28.84	28.84	-48.15
48052.50	53.85	-47.79	80.43	28.83	28.83	-48.18
48051.50	53.84	-47.80	80.42	28.82	28.82	-48.21
48050.50	53.84	-47.80	80.42	28.82	28.82	-48.23
48049.50	53.84	-47.81	80.42	28.82	28.82	-48.26
48048.50	53.83	-47.82	80.42	28.81	28.81	-48.29
48047.50	53.83	-47.82	80.42	28.81	28.81	-48.32
48046.50	53.82	-47.83	80.41	28.80	28.80	-48.35
48045.50	53.82	-47.84	80.41	28.80	28.80	-48.38
48044.50	53.81	-47.85	80.40	28.79	28.79	-48.41
48043.50	53.80	-47.86	80.40	28.78	28.78	-48.44
48042.50	53.79	-47.87	80.39	28.77	28.77	-48.47
48041.50	53.78	-47.88	80.38	28.76	28.76	-48.50
48040.50	53.78	-47.89	80.38	28.75	28.75	-48.53
48039.50	53.77	-47.90	80.37	28.75	28.75	-48.56
48038.50	53.76	-47.91	80.36	28.74	28.74	-48.60
48037.50	53.75	-47.92	80.35	28.73	28.73	-48.63
48036.50	53.74	-47.93	80.35	28.72	28.72	-48.66
48035.50	53.73	-47.94	80.34	28.71	28.71	-48.69
48034.50	53.73	-47.94	80.34	28.71	28.71	-48.72
48033.50	53.72	-47.95	80.33	28.70	28.70	-48.75
48032.50	53.72	-47.96	80.33	28.69	28.69	-48.78
48031.50	53.71	-47.97	80.32	28.69	28.69	-48.81
48030.50	53.70	-47.98	80.31	28.68	28.68	-48.84
48029.50	53.70	-47.98	80.31	28.67	28.67	-48.87
48028.50	53.69	-47.99	80.30	28.67	28.67	-48.90
48027.50	53.68	-48.00	80.29	28.66	28.66	-48.93
48026.50	53.67	-48.01	80.29	28.65	28.65	-48.96
48025.50	53.67	-48.01	80.28	28.65	28.65	-48.99
48024.50	53.66	-48.02	80.28	28.64	28.64	-49.02
48023.50	53.66	-48.03	80.27	28.63	28.63	-49.05
48022.50	53.65	-48.04	80.27	28.63	28.63	-49.08
48021.50	53.65	-48.04	80.26	28.62	28.62	-49.11
48020.50	53.64	-48.05	80.25	28.61	28.61	-49.14
48019.50	53.64	-48.05	80.25	28.61	28.61	-49.17
48018.50	53.63	-48.06	80.25	28.61	28.61	-49.20
48017.50	53.62	-48.07	80.24	28.60	28.60	-49.23
48016.50	53.61	-48.08	80.23	28.59	28.59	-49.26
48015.50	53.60	-48.09	80.22	28.58	28.58	-49.30
48014.50	53.59	-48.10	80.21	28.57	28.57	-49.33
48013.50	53.58	-48.11	80.20	28.56	28.56	-49.36
48012.50	53.57	-48.12	80.18	28.54	28.54	-49.40
48011.50	53.56	-48.13	80.17	28.54	28.54	-49.43
48010.50	53.55	-48.14	80.16	28.52	28.52	-49.47
48009.50	53.54	-48.15	80.15	28.51	28.51	-49.50
48008.50	53.53	-48.16	80.14	28.51	28.51	-49.53
48007.50	53.52	-48.17	80.13	28.49	28.49	-49.57
48006.50	53.51	-48.18	80.12	28.48	28.48	-49.60
48005.50	53.50	-48.18	80.11	28.48	28.48	-49.63
48004.50	53.50	-48.19	80.10	28.47	28.47	-49.66
48003.50	53.49	-48.20	80.09	28.46	28.46	-49.70
48002.50	53.48	-48.20	80.08	28.45	28.45	-49.73
48001.50	53.47	-48.21	80.07	28.44	28.44	-49.76
[truncated: 47,816 more rows]
