# Supplementary material for: Mysteriously high Δ 14 C of the glacial atmosphere: influence of 14 C production and carbon cycle changes
Source: Copernicus journal article supplement (doi:10.5194/cp-16-1159-2020), 2020-07-09
Supplement: Supplementary file 2 [file cp-16-1159-2020-supplement.zip › fig07,08,10_data/Fig8a_data.csv]

# Time (yr BP)	MOD (permil)	PAL (permil)	CIRC (permil)	VENT (permil)	VENTx (permil)	BIO (permil)	PHYS-BIO (permil)	PHYS-BIOx (permil)
49999.50	44.20	31.35	67.21	86.75	188.88	46.73	48.25	58.74
49998.50	44.19	31.34	67.20	86.74	188.87	46.72	48.24	58.73
49997.50	44.18	31.33	67.19	86.73	188.86	46.71	48.23	58.72
49996.50	44.16	31.31	67.18	86.71	188.84	46.69	48.23	58.70
49995.50	44.15	31.29	67.16	86.70	188.83	46.68	48.22	58.69
49994.50	44.14	31.28	67.15	86.69	188.81	46.67	48.21	58.68
49993.50	44.13	31.27	67.13	86.67	188.80	46.66	48.20	58.67
49992.50	44.11	31.25	67.12	86.66	188.79	46.65	48.18	58.66
49991.50	44.10	31.24	67.12	86.65	188.78	46.63	48.17	58.64
49990.50	44.08	31.23	67.11	86.65	188.77	46.61	48.15	58.63
49989.50	44.07	31.21	67.10	86.63	188.75	46.59	48.14	58.61
49988.50	44.05	31.20	67.09	86.62	188.74	46.58	48.12	58.60
49987.50	44.04	31.19	67.08	86.61	188.73	46.56	48.11	58.59
49986.50	44.03	31.18	67.07	86.60	188.72	46.55	48.10	58.58
49985.50	44.01	31.17	67.05	86.59	188.70	46.54	48.09	58.57
49984.50	44.00	31.16	67.04	86.57	188.68	46.52	48.08	58.56
49983.50	43.98	31.15	67.02	86.56	188.67	46.51	48.06	58.55
49982.50	43.96	31.14	67.01	86.55	188.66	46.50	48.05	58.54
49981.50	43.95	31.13	67.00	86.54	188.65	46.48	48.03	58.52
49980.50	43.93	31.11	66.99	86.53	188.64	46.47	48.02	58.50
49979.50	43.92	31.10	66.98	86.52	188.63	46.46	48.01	58.48
49978.50	43.91	31.08	66.97	86.51	188.61	46.44	48.00	58.47
49977.50	43.89	31.07	66.96	86.50	188.60	46.43	47.99	58.46
49976.50	43.88	31.05	66.95	86.49	188.59	46.42	47.98	58.44
49975.50	43.86	31.03	66.93	86.47	188.57	46.42	47.97	58.43
49974.50	43.84	31.02	66.91	86.45	188.56	46.41	47.96	58.42
49973.50	43.83	31.01	66.90	86.44	188.54	46.40	47.95	58.40
49972.50	43.81	30.99	66.89	86.43	188.53	46.39	47.94	58.39
49971.50	43.80	30.98	66.87	86.41	188.51	46.37	47.93	58.38
49970.50	43.78	30.97	66.86	86.40	188.50	46.36	47.91	58.37
49969.50	43.77	30.96	66.85	86.39	188.48	46.35	47.90	58.36
49968.50	43.75	30.95	66.84	86.38	188.47	46.34	47.90	58.35
49967.50	43.74	30.94	66.83	86.37	188.46	46.33	47.88	58.35
49966.50	43.72	30.92	66.82	86.36	188.44	46.32	47.87	58.33
49965.50	43.71	30.91	66.81	86.35	188.43	46.30	47.86	58.32
49964.50	43.69	30.89	66.80	86.34	188.42	46.28	47.84	58.31
49963.50	43.68	30.88	66.79	86.33	188.41	46.27	47.83	58.30
49962.50	43.67	30.87	66.78	86.32	188.39	46.25	47.82	58.29
49961.50	43.65	30.86	66.77	86.31	188.38	46.23	47.81	58.28
49960.50	43.63	30.85	66.76	86.30	188.37	46.22	47.80	58.27
49959.50	43.62	30.84	66.74	86.28	188.35	46.20	47.79	58.25
49958.50	43.60	30.82	66.73	86.26	188.33	46.19	47.78	58.24
49957.50	43.59	30.81	66.71	86.25	188.32	46.18	47.77	58.23
49956.50	43.57	30.80	66.70	86.24	188.31	46.17	47.76	58.22
49955.50	43.56	30.79	66.68	86.22	188.29	46.15	47.75	58.21
49954.50	43.54	30.77	66.67	86.21	188.28	46.14	47.73	58.19
49953.50	43.53	30.76	66.66	86.20	188.27	46.12	47.72	58.18
49952.50	43.51	30.75	66.65	86.19	188.25	46.11	47.71	58.17
49951.50	43.50	30.73	66.64	86.17	188.24	46.10	47.70	58.16
49950.50	43.49	30.72	66.63	86.16	188.22	46.09	47.68	58.15
49949.50	43.47	30.71	66.62	86.16	188.21	46.08	47.67	58.14
49948.50	43.46	30.69	66.61	86.15	188.20	46.07	47.66	58.12
49947.50	43.44	30.68	66.61	86.14	188.19	46.05	47.64	58.11
49946.50	43.43	30.66	66.60	86.13	188.18	46.03	47.63	58.09
49945.50	43.42	30.66	66.59	86.13	188.16	46.02	47.62	58.08
49944.50	43.40	30.64	66.58	86.12	188.15	46.00	47.61	58.07
49943.50	43.39	30.63	66.58	86.11	188.14	45.99	47.61	58.06
49942.50	43.37	30.61	66.57	86.10	188.13	45.97	47.60	58.05
49941.50	43.36	30.60	66.56	86.09	188.11	45.96	47.59	58.03
49940.50	43.34	30.58	66.55	86.08	188.10	45.94	47.57	58.02
49939.50	43.33	30.57	66.54	86.07	188.09	45.93	47.56	58.01
49938.50	43.31	30.56	66.53	86.05	188.07	45.92	47.54	57.99
49937.50	43.29	30.54	66.52	86.05	188.06	45.91	47.53	57.98
49936.50	43.27	30.53	66.50	86.03	188.05	45.90	47.53	57.97
49935.50	43.26	30.51	66.49	86.02	188.03	45.89	47.52	57.95
49934.50	43.24	30.50	66.47	86.00	188.01	45.87	47.50	57.94
49933.50	43.23	30.48	66.46	85.99	188.00	45.86	47.49	57.93
49932.50	43.21	30.47	66.45	85.98	187.99	45.85	47.48	57.91
49931.50	43.20	30.45	66.43	85.96	187.97	45.84	47.47	57.90
49930.50	43.18	30.44	66.41	85.94	187.95	45.82	47.46	57.89
49929.50	43.16	30.42	66.40	85.93	187.94	45.81	47.44	57.88
49928.50	43.14	30.40	66.39	85.92	187.92	45.80	47.43	57.86
49927.50	43.13	30.38	66.38	85.91	187.91	45.79	47.42	57.85
49926.50	43.11	30.37	66.37	85.90	187.90	45.78	47.40	57.84
49925.50	43.09	30.35	66.36	85.89	187.89	45.77	47.39	57.82
49924.50	43.08	30.33	66.36	85.88	187.88	45.76	47.38	57.81
49923.50	43.06	30.32	66.35	85.88	187.87	45.74	47.37	57.79
49922.50	43.04	30.30	66.34	85.86	187.85	45.72	47.36	57.78
49921.50	43.03	30.28	66.33	85.85	187.84	45.70	47.35	57.77
49920.50	43.01	30.26	66.31	85.84	187.83	45.68	47.34	57.76
49919.50	43.00	30.24	66.30	85.83	187.81	45.67	47.33	57.74
49918.50	42.97	30.22	66.29	85.82	187.80	45.65	47.32	57.73
49917.50	42.96	30.21	66.28	85.81	187.79	45.63	47.31	57.72
49916.50	42.95	30.21	66.27	85.79	187.77	45.61	47.29	57.70
49915.50	42.93	30.20	66.25	85.78	187.75	45.60	47.28	57.69
49914.50	42.92	30.19	66.23	85.76	187.73	45.58	47.27	57.67
49913.50	42.90	30.18	66.22	85.75	187.72	45.57	47.25	57.66
49912.50	42.89	30.16	66.20	85.73	187.70	45.55	47.24	57.64
49911.50	42.87	30.15	66.19	85.72	187.69	45.54	47.23	57.63
49910.50	42.86	30.13	66.17	85.70	187.67	45.53	47.22	57.62
49909.50	42.85	30.12	66.16	85.69	187.66	45.51	47.20	57.60
49908.50	42.83	30.11	66.15	85.68	187.64	45.50	47.19	57.59
49907.50	42.81	30.10	66.14	85.67	187.63	45.49	47.18	57.58
49906.50	42.80	30.08	66.13	85.66	187.62	45.48	47.17	57.56
49905.50	42.78	30.07	66.12	85.65	187.61	45.46	47.16	57.55
49904.50	42.77	30.05	66.11	85.64	187.59	45.45	47.14	57.54
49903.50	42.75	30.04	66.10	85.63	187.58	45.44	47.13	57.52
49902.50	42.73	30.02	66.09	85.61	187.57	45.42	47.12	57.51
49901.50	42.71	30.01	66.08	85.60	187.55	45.41	47.10	57.49
49900.50	42.70	29.99	66.07	85.59	187.54	45.40	47.09	57.48
49899.50	42.68	29.98	66.05	85.58	187.52	45.38	47.08	57.47
49898.50	42.66	29.97	66.04	85.56	187.51	45.37	47.07	57.45
49897.50	42.65	29.95	66.03	85.55	187.49	45.35	47.05	57.44
49896.50	42.63	29.94	66.01	85.54	187.48	45.34	47.04	57.43
49895.50	42.61	29.92	66.00	85.52	187.46	45.32	47.03	57.41
49894.50	42.60	29.91	65.98	85.51	187.45	45.31	47.02	57.40
49893.50	42.58	29.89	65.97	85.50	187.44	45.29	47.01	57.38
49892.50	42.57	29.88	65.96	85.48	187.42	45.28	46.99	57.36
49891.50	42.56	29.86	65.94	85.47	187.40	45.27	46.97	57.35
49890.50	42.54	29.85	65.93	85.45	187.39	45.26	46.96	57.34
49889.50	42.52	29.84	65.91	85.44	187.37	45.25	46.95	57.32
49888.50	42.51	29.83	65.90	85.43	187.36	45.24	46.94	57.30
49887.50	42.49	29.82	65.89	85.42	187.35	45.22	46.93	57.29
49886.50	42.47	29.81	65.88	85.41	187.33	45.21	46.91	57.28
49885.50	42.45	29.80	65.87	85.40	187.32	45.20	46.89	57.27
49884.50	42.43	29.78	65.86	85.39	187.31	45.18	46.88	57.26
49883.50	42.42	29.77	65.85	85.37	187.29	45.16	46.87	57.24
49882.50	42.40	29.76	65.83	85.36	187.28	45.15	46.85	57.22
49881.50	42.39	29.74	65.82	85.35	187.27	45.13	46.84	57.21
49880.50	42.37	29.73	65.81	85.33	187.25	45.12	46.83	57.19
49879.50	42.36	29.71	65.79	85.32	187.23	45.10	46.82	57.18
49878.50	42.34	29.70	65.78	85.31	187.22	45.09	46.81	57.16
49877.50	42.32	29.68	65.77	85.29	187.21	45.07	46.79	57.15
49876.50	42.30	29.67	65.75	85.28	187.19	45.05	46.78	57.13
49875.50	42.28	29.65	65.73	85.26	187.17	45.03	46.76	57.12
49874.50	42.27	29.63	65.71	85.24	187.15	45.02	46.75	57.11
49873.50	42.25	29.62	65.70	85.23	187.14	45.01	46.74	57.09
49872.50	42.23	29.60	65.68	85.21	187.12	44.99	46.72	57.08
49871.50	42.22	29.58	65.67	85.20	187.10	44.97	46.71	57.06
49870.50	42.20	29.56	65.66	85.18	187.09	44.96	46.70	57.05
49869.50	42.19	29.55	65.64	85.17	187.08	44.94	46.68	57.04
49868.50	42.17	29.53	65.63	85.16	187.06	44.93	46.67	57.03
49867.50	42.15	29.51	65.62	85.15	187.05	44.92	46.66	57.01
49866.50	42.13	29.50	65.61	85.14	187.04	44.90	46.64	56.99
49865.50	42.11	29.48	65.60	85.13	187.02	44.88	46.63	56.98
49864.50	42.09	29.47	65.59	85.12	187.01	44.87	46.61	56.96
49863.50	42.08	29.45	65.57	85.10	186.99	44.86	46.60	56.95
49862.50	42.05	29.44	65.56	85.09	186.98	44.84	46.58	56.93
49861.50	42.04	29.42	65.55	85.08	186.97	44.83	46.57	56.91
49860.50	42.02	29.40	65.53	85.06	186.95	44.81	46.56	56.90
49859.50	42.01	29.39	65.52	85.04	186.93	44.80	46.55	56.88
49858.50	41.99	29.37	65.50	85.03	186.92	44.79	46.54	56.87
49857.50	41.97	29.36	65.49	85.02	186.91	44.77	46.52	56.86
49856.50	41.95	29.34	65.47	85.00	186.89	44.75	46.50	56.84
49855.50	41.94	29.33	65.45	84.98	186.87	44.74	46.48	56.83
49854.50	41.92	29.31	65.44	84.97	186.85	44.73	46.47	56.82
49853.50	41.90	29.30	65.42	84.95	186.84	44.72	46.45	56.80
49852.50	41.88	29.28	65.41	84.94	186.82	44.70	46.43	56.79
49851.50	41.86	29.26	65.39	84.92	186.80	44.68	46.41	56.78
49850.50	41.85	29.24	65.38	84.91	186.79	44.66	46.40	56.76
49849.50	41.83	29.23	65.36	84.89	186.77	44.65	46.38	56.75
49848.50	41.81	29.21	65.34	84.87	186.75	44.64	46.37	56.73
49847.50	41.79	29.20	65.33	84.86	186.74	44.62	46.35	56.72
49846.50	41.77	29.18	65.32	84.85	186.72	44.60	46.33	56.70
49845.50	41.75	29.16	65.31	84.84	186.71	44.58	46.32	56.69
49844.50	41.74	29.14	65.29	84.82	186.69	44.56	46.31	56.67
49843.50	41.72	29.13	65.27	84.81	186.68	44.54	46.30	56.66
49842.50	41.70	29.12	65.26	84.79	186.66	44.53	46.28	56.64
49841.50	41.69	29.10	65.25	84.78	186.65	44.51	46.27	56.63
49840.50	41.67	29.08	65.23	84.76	186.63	44.49	46.26	56.61
49839.50	41.65	29.06	65.21	84.74	186.61	44.46	46.24	56.59
49838.50	41.63	29.04	65.20	84.73	186.60	44.44	46.23	56.57
49837.50	41.61	29.02	65.18	84.71	186.58	44.43	46.20	56.56
49836.50	41.59	29.01	65.16	84.70	186.56	44.41	46.19	56.54
49835.50	41.57	28.99	65.15	84.68	186.55	44.39	46.17	56.52
49834.50	41.55	28.96	65.13	84.66	186.53	44.37	46.16	56.50
49833.50	41.53	28.95	65.11	84.65	186.52	44.35	46.14	56.48
49832.50	41.51	28.93	65.09	84.63	186.50	44.34	46.13	56.47
49831.50	41.49	28.92	65.07	84.61	186.47	44.32	46.12	56.45
49830.50	41.48	28.90	65.05	84.59	186.46	44.30	46.11	56.44
49829.50	41.46	28.88	65.04	84.57	186.44	44.29	46.09	56.42
49828.50	41.44	28.86	65.02	84.56	186.42	44.28	46.07	56.40
49827.50	41.43	28.84	65.01	84.54	186.41	44.27	46.05	56.38
49826.50	41.41	28.82	64.99	84.53	186.39	44.25	46.03	56.36
49825.50	41.39	28.80	64.98	84.51	186.37	44.24	46.02	56.35
49824.50	41.37	28.79	64.96	84.50	186.35	44.22	46.01	56.34
49823.50	41.36	28.77	64.95	84.48	186.34	44.21	46.00	56.32
49822.50	41.34	28.75	64.93	84.47	186.32	44.20	45.98	56.31
49821.50	41.32	28.74	64.91	84.45	186.30	44.18	45.97	56.29
49820.50	41.30	28.72	64.89	84.43	186.28	44.16	45.95	56.27
49819.50	41.28	28.70	64.88	84.42	186.27	44.14	45.92	56.25
49818.50	41.26	28.68	64.87	84.40	186.26	44.12	45.90	56.23
49817.50	41.24	28.66	64.85	84.38	186.24	44.10	45.89	56.21
49816.50	41.22	28.64	64.83	84.37	186.22	44.08	45.88	56.20
49815.50	41.20	28.63	64.82	84.35	186.20	44.07	45.86	56.18
49814.50	41.18	28.61	64.80	84.34	186.18	44.05	45.85	56.17
49813.50	41.16	28.60	64.78	84.32	186.16	44.04	45.84	56.15
49812.50	41.14	28.58	64.77	84.30	186.15	44.02	45.82	56.14
49811.50	41.12	28.57	64.75	84.29	186.13	44.00	45.80	56.12
49810.50	41.11	28.55	64.74	84.28	186.11	43.98	45.78	56.10
49809.50	41.09	28.54	64.73	84.26	186.10	43.97	45.77	56.08
49808.50	41.07	28.53	64.71	84.24	186.08	43.95	45.75	56.06
49807.50	41.05	28.51	64.69	84.23	186.06	43.94	45.73	56.05
49806.50	41.03	28.50	64.68	84.21	186.04	43.92	45.71	56.03
49805.50	41.02	28.48	64.66	84.20	186.02	43.90	45.70	56.01
49804.50	41.00	28.46	64.64	84.18	186.00	43.89	45.68	55.99
49803.50	40.98	28.45	64.63	84.16	185.99	43.87	45.67	55.97
49802.50	40.97	28.43	64.61	84.14	185.97	43.86	45.65	55.95
49801.50	40.95	28.41	64.59	84.13	185.95	43.84	45.64	55.93
49800.50	40.93	28.40	64.57	84.11	185.93	43.82	45.62	55.92
49799.50	40.91	28.38	64.56	84.09	185.91	43.80	45.61	55.91
49798.50	40.89	28.36	64.54	84.07	185.89	43.78	45.59	55.89
49797.50	40.87	28.34	64.52	84.05	185.87	43.76	45.57	55.88
49796.50	40.85	28.33	64.50	84.04	185.85	43.75	45.55	55.86
49795.50	40.83	28.31	64.49	84.02	185.83	43.73	45.53	55.84
49794.50	40.81	28.29	64.47	84.00	185.81	43.72	45.52	55.83
49793.50	40.79	28.27	64.45	83.98	185.79	43.70	45.50	55.81
49792.50	40.77	28.24	64.43	83.97	185.77	43.68	45.48	55.79
49791.50	40.75	28.22	64.42	83.95	185.76	43.67	45.46	55.77
49790.50	40.73	28.20	64.40	83.93	185.74	43.65	45.44	55.76
49789.50	40.71	28.18	64.38	83.91	185.72	43.63	45.42	55.74
49788.50	40.69	28.16	64.36	83.90	185.70	43.61	45.40	55.73
49787.50	40.67	28.15	64.35	83.88	185.68	43.59	45.38	55.70
49786.50	40.65	28.13	64.33	83.87	185.66	43.57	45.36	55.68
49785.50	40.63	28.12	64.32	83.85	185.65	43.55	45.34	55.66
49784.50	40.61	28.10	64.31	83.84	185.63	43.54	45.33	55.65
49783.50	40.59	28.09	64.29	83.82	185.61	43.53	45.31	55.64
49782.50	40.57	28.07	64.28	83.81	185.60	43.51	45.30	55.62
49781.50	40.55	28.05	64.26	83.79	185.58	43.49	45.28	55.60
49780.50	40.53	28.04	64.24	83.77	185.56	43.48	45.26	55.58
49779.50	40.50	28.02	64.23	83.76	185.54	43.46	45.24	55.57
49778.50	40.48	28.00	64.21	83.74	185.52	43.44	45.22	55.55
49777.50	40.46	27.98	64.19	83.72	185.50	43.42	45.20	55.53
49776.50	40.44	27.96	64.17	83.70	185.48	43.39	45.18	55.51
49775.50	40.42	27.95	64.15	83.68	185.46	43.37	45.16	55.50
49774.50	40.40	27.93	64.13	83.66	185.44	43.35	45.15	55.48
49773.50	40.38	27.91	64.11	83.64	185.41	43.33	45.13	55.46
49772.50	40.36	27.90	64.09	83.62	185.39	43.31	45.12	55.45
49771.50	40.35	27.87	64.07	83.60	185.37	43.30	45.10	55.43
49770.50	40.33	27.85	64.06	83.59	185.35	43.28	45.08	55.41
49769.50	40.31	27.83	64.04	83.57	185.34	43.26	45.06	55.39
49768.50	40.29	27.81	64.03	83.56	185.32	43.25	45.05	55.37
49767.50	40.27	27.79	64.01	83.54	185.30	43.23	45.04	55.35
49766.50	40.25	27.77	64.00	83.52	185.28	43.21	45.02	55.34
49765.50	40.24	27.76	63.98	83.51	185.26	43.19	45.01	55.32
49764.50	40.22	27.74	63.96	83.49	185.25	43.17	44.99	55.31
49763.50	40.20	27.72	63.95	83.47	185.22	43.15	44.97	55.29
49762.50	40.18	27.70	63.93	83.46	185.21	43.13	44.95	55.27
49761.50	40.16	27.67	63.91	83.44	185.19	43.12	44.93	55.25
49760.50	40.14	27.65	63.89	83.42	185.17	43.10	44.91	55.24
49759.50	40.12	27.63	63.87	83.40	185.14	43.08	44.90	55.22
49758.50	40.10	27.62	63.85	83.38	185.12	43.06	44.88	55.20
49757.50	40.08	27.59	63.83	83.36	185.10	43.04	44.86	55.18
49756.50	40.06	27.57	63.82	83.34	185.08	43.02	44.84	55.16
49755.50	40.04	27.56	63.80	83.32	185.06	43.01	44.83	55.14
49754.50	40.02	27.54	63.77	83.30	185.04	42.99	44.81	55.13
49753.50	40.00	27.53	63.76	83.28	185.02	42.97	44.79	55.11
49752.50	39.98	27.51	63.74	83.27	185.00	42.95	44.77	55.09
49751.50	39.96	27.50	63.72	83.25	184.98	42.93	44.76	55.07
49750.50	39.93	27.48	63.70	83.23	184.96	42.91	44.74	55.06
49749.50	39.91	27.46	63.69	83.21	184.94	42.89	44.72	55.04
49748.50	39.89	27.44	63.67	83.20	184.92	42.87	44.70	55.02
49747.50	39.87	27.43	63.65	83.18	184.90	42.86	44.68	55.00
49746.50	39.85	27.40	63.64	83.16	184.88	42.84	44.67	54.98
49745.50	39.83	27.38	63.62	83.15	184.87	42.82	44.66	54.97
49744.50	39.81	27.36	63.61	83.13	184.85	42.80	44.64	54.95
49743.50	39.79	27.34	63.59	83.12	184.83	42.78	44.62	54.93
49742.50	39.77	27.32	63.58	83.10	184.81	42.76	44.61	54.91
49741.50	39.75	27.30	63.56	83.08	184.79	42.73	44.59	54.89
49740.50	39.73	27.28	63.54	83.06	184.77	42.72	44.57	54.87
49739.50	39.71	27.27	63.53	83.05	184.76	42.70	44.55	54.85
49738.50	39.69	27.25	63.51	83.03	184.74	42.68	44.53	54.84
49737.50	39.67	27.24	63.49	83.01	184.71	42.67	44.50	54.82
49736.50	39.65	27.22	63.47	82.99	184.69	42.65	44.49	54.80
49735.50	39.63	27.20	63.45	82.97	184.67	42.63	44.47	54.78
49734.50	39.61	27.18	63.43	82.95	184.65	42.61	44.45	54.76
49733.50	39.59	27.16	63.41	82.93	184.62	42.58	44.43	54.75
49732.50	39.57	27.14	63.39	82.91	184.61	42.56	44.41	54.73
49731.50	39.55	27.12	63.37	82.89	184.59	42.54	44.39	54.71
49730.50	39.53	27.10	63.35	82.87	184.56	42.53	44.37	54.69
49729.50	39.51	27.08	63.33	82.85	184.54	42.52	44.35	54.67
49728.50	39.49	27.06	63.31	82.83	184.52	42.50	44.34	54.64
49727.50	39.47	27.04	63.29	82.81	184.50	42.48	44.32	54.61
49726.50	39.45	27.02	63.27	82.79	184.48	42.46	44.30	54.60
49725.50	39.43	27.00	63.25	82.77	184.46	42.44	44.29	54.58
49724.50	39.41	26.98	63.23	82.75	184.44	42.43	44.27	54.56
49723.50	39.39	26.97	63.22	82.74	184.42	42.41	44.26	54.55
49722.50	39.36	26.95	63.20	82.72	184.40	42.39	44.24	54.53
49721.50	39.34	26.93	63.19	82.70	184.38	42.37	44.22	54.51
49720.50	39.32	26.91	63.17	82.69	184.36	42.35	44.21	54.50
49719.50	39.30	26.89	63.15	82.67	184.35	42.32	44.19	54.48
49718.50	39.28	26.88	63.14	82.66	184.33	42.30	44.17	54.46
49717.50	39.26	26.85	63.12	82.64	184.31	42.27	44.15	54.44
49716.50	39.23	26.83	63.10	82.62	184.29	42.25	44.14	54.42
49715.50	39.21	26.81	63.09	82.60	184.27	42.23	44.12	54.40
49714.50	39.19	26.79	63.07	82.58	184.25	42.21	44.10	54.39
49713.50	39.17	26.77	63.05	82.56	184.22	42.19	44.08	54.37
49712.50	39.14	26.75	63.03	82.55	184.21	42.18	44.06	54.34
49711.50	39.12	26.74	63.01	82.53	184.19	42.16	44.05	54.33
49710.50	39.10	26.72	62.99	82.50	184.16	42.14	44.03	54.31
49709.50	39.08	26.70	62.96	82.48	184.13	42.12	44.01	54.29
49708.50	39.06	26.68	62.95	82.46	184.12	42.11	43.99	54.27
49707.50	39.04	26.66	62.93	82.44	184.09	42.09	43.97	54.25
49706.50	39.02	26.64	62.90	82.42	184.07	42.07	43.95	54.24
49705.50	39.00	26.62	62.88	82.40	184.04	42.06	43.93	54.22
49704.50	38.98	26.61	62.87	82.38	184.02	42.04	43.91	54.20
49703.50	38.95	26.59	62.85	82.36	184.00	42.02	43.89	54.18
49702.50	38.94	26.57	62.83	82.34	183.98	42.01	43.87	54.16
49701.50	38.92	26.55	62.81	82.33	183.97	41.98	43.84	54.14
49700.50	38.90	26.53	62.80	82.31	183.95	41.97	43.82	54.12
49699.50	38.88	26.51	62.78	82.29	183.93	41.94	43.80	54.10
49698.50	38.86	26.50	62.77	82.28	183.91	41.92	43.79	54.08
49697.50	38.84	26.48	62.75	82.26	183.89	41.90	43.76	54.07
49696.50	38.81	26.45	62.73	82.24	183.87	41.88	43.74	54.05
49695.50	38.79	26.44	62.71	82.22	183.85	41.86	43.72	54.03
49694.50	38.77	26.42	62.69	82.20	183.83	41.84	43.70	54.01
49693.50	38.75	26.40	62.67	82.18	183.81	41.82	43.69	53.99
49692.50	38.73	26.37	62.66	82.17	183.79	41.79	43.66	53.97
49691.50	38.71	26.36	62.63	82.15	183.77	41.77	43.64	53.95
49690.50	38.69	26.34	62.61	82.13	183.74	41.75	43.62	53.93
49689.50	38.67	26.32	62.60	82.11	183.72	41.73	43.59	53.91
49688.50	38.65	26.30	62.58	82.09	183.70	41.71	43.57	53.89
49687.50	38.62	26.28	62.56	82.07	183.68	41.69	43.56	53.88
49686.50	38.60	26.27	62.54	82.05	183.66	41.67	43.55	53.86
49685.50	38.58	26.25	62.52	82.03	183.64	41.65	43.53	53.85
49684.50	38.55	26.23	62.50	82.01	183.62	41.63	43.52	53.83
49683.50	38.53	26.21	62.48	81.99	183.60	41.62	43.50	53.80
49682.50	38.51	26.19	62.47	81.98	183.58	41.60	43.49	53.78
49681.50	38.49	26.17	62.45	81.96	183.56	41.58	43.47	53.76
49680.50	38.47	26.15	62.43	81.94	183.54	41.56	43.46	53.74
49679.50	38.45	26.13	62.41	81.92	183.52	41.54	43.44	53.71
49678.50	38.42	26.11	62.40	81.90	183.50	41.52	43.42	53.69
49677.50	38.41	26.09	62.38	81.88	183.48	41.51	43.40	53.67
49676.50	38.39	26.07	62.36	81.87	183.46	41.49	43.39	53.65
49675.50	38.37	26.05	62.34	81.85	183.44	41.47	43.37	53.63
49674.50	38.35	26.03	62.32	81.83	183.42	41.45	43.35	53.62
49673.50	38.33	26.01	62.30	81.81	183.40	41.43	43.33	53.60
49672.50	38.31	25.98	62.28	81.79	183.38	41.41	43.31	53.58
49671.50	38.29	25.96	62.26	81.77	183.36	41.39	43.29	53.56
49670.50	38.26	25.94	62.24	81.75	183.34	41.38	43.27	53.54
49669.50	38.24	25.92	62.22	81.73	183.31	41.36	43.25	53.52
49668.50	38.22	25.90	62.20	81.71	183.29	41.33	43.23	53.50
49667.50	38.20	25.88	62.18	81.69	183.27	41.30	43.21	53.48
49666.50	38.18	25.86	62.17	81.67	183.25	41.27	43.20	53.46
49665.50	38.16	25.85	62.14	81.65	183.23	41.25	43.18	53.45
49664.50	38.13	25.82	62.13	81.63	183.21	41.23	43.16	53.43
49663.50	38.11	25.81	62.11	81.62	183.19	41.22	43.14	53.41
49662.50	38.09	25.79	62.09	81.60	183.17	41.19	43.12	53.39
49661.50	38.07	25.77	62.07	81.58	183.15	41.18	43.10	53.37
49660.50	38.05	25.75	62.05	81.56	183.13	41.16	43.07	53.36
49659.50	38.04	25.74	62.03	81.54	183.11	41.15	43.05	53.34
49658.50	38.02	25.72	62.02	81.52	183.09	41.12	43.03	53.32
49657.50	38.00	25.70	62.00	81.50	183.07	41.10	43.02	53.30
49656.50	37.98	25.68	61.98	81.49	183.05	41.08	43.00	53.27
49655.50	37.96	25.66	61.97	81.47	183.03	41.06	42.97	53.25
49654.50	37.93	25.64	61.95	81.45	183.01	41.04	42.95	53.24
49653.50	37.91	25.61	61.93	81.44	182.99	41.02	42.94	53.22
49652.50	37.89	25.59	61.91	81.41	182.97	41.00	42.92	53.21
49651.50	37.87	25.57	61.89	81.40	182.95	40.98	42.89	53.19
49650.50	37.85	25.55	61.88	81.38	182.93	40.97	42.87	53.17
49649.50	37.83	25.53	61.86	81.36	182.91	40.95	42.85	53.14
49648.50	37.80	25.51	61.84	81.34	182.88	40.93	42.83	53.12
49647.50	37.78	25.50	61.81	81.31	182.86	40.91	42.82	53.10
49646.50	37.76	25.48	61.79	81.30	182.84	40.89	42.81	53.08
49645.50	37.74	25.46	61.77	81.28	182.81	40.87	42.79	53.06
49644.50	37.72	25.44	61.75	81.25	182.79	40.85	42.77	53.04
49643.50	37.69	25.41	61.73	81.23	182.76	40.82	42.76	53.03
49642.50	37.67	25.39	61.71	81.21	182.74	40.80	42.73	53.01
49641.50	37.65	25.37	61.69	81.19	182.72	40.78	42.71	52.99
49640.50	37.63	25.35	61.67	81.17	182.70	40.76	42.69	52.97
49639.50	37.61	25.34	61.65	81.15	182.68	40.75	42.66	52.95
49638.50	37.59	25.32	61.63	81.13	182.66	40.73	42.65	52.93
49637.50	37.57	25.30	61.61	81.11	182.64	40.71	42.63	52.91
49636.50	37.55	25.28	61.59	81.09	182.61	40.69	42.61	52.89
49635.50	37.53	25.26	61.57	81.07	182.59	40.67	42.58	52.87
49634.50	37.51	25.24	61.56	81.06	182.57	40.65	42.56	52.85
49633.50	37.49	25.22	61.54	81.04	182.56	40.63	42.55	52.83
49632.50	37.47	25.19	61.52	81.02	182.54	40.61	42.53	52.81
49631.50	37.45	25.17	61.50	81.00	182.52	40.58	42.51	52.79
49630.50	37.43	25.15	61.49	80.98	182.49	40.56	42.49	52.77
49629.50	37.40	25.13	61.47	80.97	182.47	40.53	42.47	52.75
49628.50	37.38	25.11	61.45	80.95	182.46	40.52	42.45	52.73
49627.50	37.36	25.09	61.43	80.93	182.43	40.50	42.44	52.71
49626.50	37.34	25.08	61.40	80.90	182.41	40.48	42.41	52.69
49625.50	37.32	25.06	61.38	80.88	182.38	40.46	42.39	52.67
49624.50	37.29	25.04	61.36	80.86	182.36	40.43	42.36	52.65
49623.50	37.27	25.02	61.34	80.84	182.34	40.41	42.34	52.63
49622.50	37.25	25.00	61.32	80.82	182.31	40.40	42.32	52.61
49621.50	37.23	24.99	61.30	80.79	182.29	40.38	42.31	52.60
49620.50	37.21	24.96	61.28	80.78	182.27	40.36	42.29	52.58
49619.50	37.19	24.94	61.26	80.76	182.25	40.33	42.28	52.56
49618.50	37.17	24.92	61.24	80.73	182.22	40.31	42.25	52.54
49617.50	37.15	24.89	61.22	80.71	182.20	40.29	42.23	52.52
49616.50	37.13	24.87	61.20	80.69	182.18	40.27	42.21	52.50
49615.50	37.11	24.84	61.18	80.67	182.16	40.25	42.19	52.48
49614.50	37.09	24.82	61.16	80.66	182.14	40.23	42.17	52.46
49613.50	37.06	24.81	61.14	80.64	182.12	40.21	42.16	52.44
49612.50	37.04	24.79	61.13	80.62	182.10	40.20	42.14	52.42
49611.50	37.02	24.78	61.11	80.61	182.08	40.18	42.12	52.41
49610.50	37.00	24.76	61.09	80.59	182.06	40.16	42.10	52.39
49609.50	36.98	24.74	61.07	80.57	182.04	40.14	42.08	52.37
49608.50	36.96	24.72	61.05	80.55	182.01	40.12	42.06	52.35
49607.50	36.93	24.69	61.03	80.53	182.00	40.10	42.04	52.33
49606.50	36.91	24.67	61.01	80.51	181.97	40.08	42.03	52.31
49605.50	36.89	24.65	60.99	80.48	181.95	40.06	42.01	52.29
49604.50	36.87	24.63	60.97	80.46	181.92	40.04	41.99	52.27
49603.50	36.85	24.61	60.95	80.44	181.90	40.02	41.97	52.25
49602.50	36.83	24.59	60.93	80.42	181.88	40.00	41.95	52.23
49601.50	36.81	24.57	60.90	80.40	181.85	39.98	41.93	52.21
49600.50	36.79	24.55	60.88	80.37	181.83	39.96	41.90	52.19
49599.50	36.76	24.53	60.86	80.35	181.81	39.94	41.88	52.17
49598.50	36.74	24.52	60.84	80.34	181.78	39.92	41.85	52.15
49597.50	36.72	24.50	60.83	80.32	181.76	39.90	41.84	52.14
49596.50	36.70	24.48	60.81	80.30	181.74	39.87	41.82	52.12
49595.50	36.68	24.46	60.79	80.28	181.72	39.85	41.80	52.09
49594.50	36.66	24.44	60.77	80.26	181.70	39.83	41.79	52.07
49593.50	36.64	24.42	60.75	80.24	181.68	39.81	41.77	52.05
49592.50	36.62	24.39	60.74	80.23	181.66	39.79	41.75	52.03
49591.50	36.59	24.37	60.72	80.21	181.64	39.77	41.73	52.01
49590.50	36.57	24.35	60.70	80.19	181.61	39.74	41.72	51.99
49589.50	36.54	24.34	60.68	80.17	181.59	39.72	41.70	51.96
49588.50	36.52	24.31	60.66	80.15	181.57	39.70	41.68	51.94
49587.50	36.50	24.29	60.64	80.12	181.54	39.68	41.66	51.93
49586.50	36.48	24.27	60.61	80.10	181.52	39.66	41.64	51.91
49585.50	36.46	24.25	60.59	80.08	181.50	39.64	41.62	51.89
49584.50	36.44	24.23	60.57	80.06	181.47	39.62	41.60	51.86
49583.50	36.42	24.22	60.55	80.03	181.45	39.60	41.58	51.84
49582.50	36.39	24.20	60.53	80.02	181.43	39.58	41.56	51.83
49581.50	36.37	24.18	60.51	80.00	181.41	39.56	41.55	51.81
49580.50	36.35	24.16	60.49	79.98	181.39	39.54	41.53	51.80
49579.50	36.33	24.13	60.48	79.96	181.37	39.52	41.51	51.78
49578.50	36.31	24.11	60.46	79.94	181.35	39.50	41.49	51.76
49577.50	36.29	24.10	60.44	79.92	181.33	39.48	41.46	51.74
49576.50	36.27	24.08	60.42	79.91	181.31	39.45	41.44	51.72
49575.50	36.24	24.06	60.40	79.88	181.29	39.43	41.42	51.70
49574.50	36.22	24.04	60.38	79.86	181.26	39.41	41.39	51.68
49573.50	36.20	24.01	60.36	79.85	181.24	39.39	41.38	51.66
49572.50	36.18	23.99	60.34	79.83	181.22	39.37	41.36	51.64
49571.50	36.16	23.97	60.32	79.81	181.20	39.35	41.34	51.62
49570.50	36.14	23.95	60.31	79.79	181.18	39.33	41.32	51.60
49569.50	36.12	23.93	60.28	79.77	181.15	39.31	41.30	51.58
49568.50	36.10	23.92	60.27	79.75	181.13	39.29	41.29	51.56
49567.50	36.09	23.89	60.25	79.73	181.11	39.27	41.26	51.54
49566.50	36.06	23.87	60.23	79.71	181.09	39.25	41.25	51.52
49565.50	36.04	23.85	60.20	79.69	181.07	39.23	41.24	51.50
49564.50	36.01	23.83	60.19	79.67	181.05	39.21	41.22	51.48
49563.50	35.99	23.81	60.17	79.65	181.02	39.19	41.20	51.46
49562.50	35.97	23.78	60.15	79.63	181.00	39.17	41.18	51.43
49561.50	35.95	23.76	60.13	79.61	180.98	39.14	41.16	51.40
49560.50	35.93	23.74	60.11	79.58	180.96	39.12	41.14	51.38
49559.50	35.91	23.72	60.09	79.57	180.94	39.10	41.12	51.36
49558.50	35.88	23.71	60.07	79.55	180.92	39.08	41.10	51.34
49557.50	35.86	23.69	60.05	79.53	180.89	39.06	41.07	51.33
49556.50	35.84	23.66	60.03	79.51	180.87	39.04	41.05	51.31
49555.50	35.82	23.64	60.01	79.49	180.85	39.02	41.03	51.29
49554.50	35.79	23.62	59.99	79.47	180.83	39.00	41.01	51.27
49553.50	35.77	23.60	59.97	79.45	180.81	38.98	40.99	51.25
49552.50	35.74	23.58	59.96	79.43	180.79	38.96	40.97	51.23
49551.50	35.72	23.56	59.94	79.41	180.77	38.94	40.95	51.21
49550.50	35.70	23.55	59.91	79.39	180.74	38.92	40.93	51.19
49549.50	35.68	23.53	59.89	79.37	180.72	38.90	40.92	51.16
49548.50	35.66	23.51	59.87	79.35	180.70	38.88	40.90	51.14
49547.50	35.64	23.49	59.85	79.33	180.68	38.86	40.88	51.13
49546.50	35.62	23.47	59.84	79.31	180.66	38.84	40.86	51.11
49545.50	35.59	23.44	59.82	79.29	180.64	38.82	40.84	51.09
49544.50	35.57	23.42	59.80	79.27	180.62	38.80	40.82	51.07
49543.50	35.55	23.40	59.78	79.26	180.60	38.78	40.79	51.05
49542.50	35.52	23.37	59.76	79.24	180.57	38.76	40.77	51.03
49541.50	35.50	23.35	59.74	79.22	180.55	38.73	40.75	51.01
49540.50	35.48	23.33	59.72	79.20	180.53	38.71	40.72	50.99
49539.50	35.45	23.31	59.71	79.18	180.51	38.69	40.70	50.96
49538.50	35.43	23.29	59.69	79.16	180.49	38.67	40.68	50.94
49537.50	35.41	23.27	59.67	79.14	180.47	38.64	40.66	50.93
49536.50	35.39	23.25	59.65	79.12	180.45	38.63	40.64	50.91
49535.50	35.37	23.23	59.63	79.10	180.42	38.61	40.62	50.88
49534.50	35.34	23.21	59.60	79.07	180.39	38.58	40.61	50.86
49533.50	35.32	23.19	59.58	79.05	180.37	38.56	40.59	50.85
49532.50	35.30	23.17	59.55	79.03	180.35	38.54	40.57	50.83
49531.50	35.28	23.14	59.53	79.01	180.32	38.52	40.56	50.81
49530.50	35.26	23.13	59.52	78.99	180.30	38.49	40.54	50.78
49529.50	35.23	23.11	59.50	78.97	180.29	38.47	40.52	50.76
49528.50	35.21	23.09	59.47	78.95	180.26	38.45	40.50	50.74
49527.50	35.19	23.07	59.45	78.92	180.24	38.42	40.48	50.72
49526.50	35.17	23.05	59.44	78.91	180.22	38.40	40.46	50.70
49525.50	35.15	23.03	59.42	78.89	180.20	38.38	40.44	50.68
49524.50	35.12	23.01	59.39	78.86	180.17	38.36	40.42	50.66
49523.50	35.10	22.99	59.37	78.84	180.15	38.34	40.40	50.64
49522.50	35.07	22.97	59.35	78.82	180.13	38.32	40.37	50.61
49521.50	35.05	22.94	59.34	78.80	180.10	38.30	40.35	50.59
49520.50	35.03	22.92	59.32	78.79	180.08	38.27	40.33	50.57
49519.50	35.00	22.90	59.30	78.77	180.06	38.25	40.31	50.54
49518.50	34.98	22.88	59.28	78.75	180.04	38.24	40.29	50.52
49517.50	34.96	22.85	59.26	78.73	180.02	38.22	40.27	50.51
49516.50	34.94	22.83	59.24	78.71	180.00	38.20	40.24	50.50
49515.50	34.91	22.82	59.22	78.69	179.97	38.18	40.22	50.48
49514.50	34.89	22.80	59.20	78.66	179.95	38.16	40.20	50.46
49513.50	34.86	22.77	59.18	78.64	179.93	38.14	40.18	50.43
49512.50	34.84	22.75	59.16	78.62	179.90	38.12	40.16	50.41
49511.50	34.82	22.73	59.13	78.60	179.88	38.10	40.14	50.39
49510.50	34.80	22.71	59.11	78.57	179.85	38.07	40.12	50.37
49509.50	34.77	22.69	59.09	78.55	179.83	38.05	40.11	50.35
49508.50	34.75	22.67	59.06	78.53	179.80	38.02	40.08	50.33
49507.50	34.73	22.65	59.04	78.51	179.77	38.00	40.05	50.31
49506.50	34.70	22.64	59.02	78.48	179.75	37.97	40.03	50.28
49505.50	34.68	22.62	59.00	78.46	179.73	37.95	40.00	50.26
49504.50	34.66	22.59	58.98	78.44	179.70	37.92	39.98	50.23
49503.50	34.64	22.57	58.96	78.42	179.68	37.90	39.97	50.21
49502.50	34.62	22.54	58.94	78.40	179.66	37.88	39.95	50.19
49501.50	34.60	22.52	58.92	78.38	179.64	37.86	39.93	50.17
49500.50	34.57	22.50	58.90	78.36	179.62	37.84	39.91	50.15
49499.50	34.55	22.47	58.88	78.34	179.60	37.82	39.88	50.14
49498.50	34.52	22.45	58.86	78.32	179.57	37.80	39.86	50.12
49497.50	34.50	22.43	58.83	78.30	179.55	37.77	39.84	50.09
49496.50	34.48	22.41	58.81	78.28	179.53	37.75	39.82	50.07
49495.50	34.46	22.39	58.80	78.26	179.50	37.73	39.80	50.05
49494.50	34.43	22.37	58.78	78.24	179.48	37.70	39.78	50.03
49493.50	34.41	22.35	58.76	78.22	179.46	37.68	39.76	50.01
49492.50	34.39	22.33	58.73	78.19	179.43	37.66	39.73	49.98
49491.50	34.37	22.31	58.71	78.17	179.41	37.63	39.71	49.96
49490.50	34.34	22.28	58.69	78.15	179.39	37.61	39.69	49.94
49489.50	34.32	22.26	58.67	78.13	179.36	37.59	39.66	49.92
49488.50	34.30	22.24	58.64	78.10	179.33	37.57	39.64	49.90
49487.50	34.27	22.22	58.62	78.08	179.31	37.55	39.62	49.88
49486.50	34.25	22.20	58.59	78.05	179.29	37.53	39.60	49.87
49485.50	34.22	22.17	58.57	78.03	179.26	37.51	39.58	49.84
49484.50	34.20	22.15	58.55	78.01	179.23	37.48	39.56	49.82
49483.50	34.18	22.13	58.53	77.99	179.20	37.46	39.54	49.80
49482.50	34.16	22.10	58.51	77.96	179.18	37.44	39.52	49.78
49481.50	34.14	22.08	58.49	77.94	179.16	37.42	39.50	49.75
49480.50	34.11	22.06	58.46	77.92	179.13	37.40	39.48	49.73
49479.50	34.09	22.04	58.44	77.90	179.11	37.38	39.46	49.71
49478.50	34.07	22.02	58.42	77.88	179.09	37.36	39.43	49.68
49477.50	34.04	22.00	58.40	77.86	179.07	37.34	39.41	49.67
49476.50	34.02	21.99	58.38	77.84	179.05	37.32	39.38	49.65
49475.50	33.99	21.97	58.36	77.82	179.02	37.29	39.36	49.63
49474.50	33.97	21.95	58.34	77.80	179.00	37.27	39.34	49.60
49473.50	33.95	21.92	58.32	77.78	178.98	37.24	39.32	49.58
49472.50	33.93	21.90	58.30	77.76	178.96	37.22	39.30	49.56
49471.50	33.91	21.88	58.27	77.73	178.93	37.19	39.28	49.54
49470.50	33.88	21.86	58.25	77.70	178.90	37.17	39.25	49.51
49469.50	33.86	21.84	58.23	77.68	178.88	37.15	39.23	49.49
49468.50	33.84	21.81	58.20	77.66	178.85	37.12	39.20	49.47
49467.50	33.82	21.79	58.18	77.63	178.82	37.09	39.17	49.45
49466.50	33.80	21.77	58.15	77.61	178.80	37.07	39.15	49.43
49465.50	33.77	21.75	58.13	77.59	178.77	37.05	39.12	49.40
49464.50	33.75	21.72	58.11	77.57	178.75	37.03	39.10	49.38
49463.50	33.72	21.70	58.09	77.55	178.73	37.01	39.08	49.36
49462.50	33.70	21.68	58.07	77.53	178.71	36.99	39.06	49.34
49461.50	33.67	21.65	58.05	77.50	178.68	36.97	39.04	49.32
49460.50	33.65	21.63	58.03	77.48	178.66	36.95	39.01	49.30
49459.50	33.63	21.61	58.01	77.46	178.64	36.93	38.99	49.27
49458.50	33.60	21.59	57.98	77.44	178.61	36.90	38.98	49.25
49457.50	33.58	21.57	57.96	77.41	178.59	36.88	38.96	49.23
49456.50	33.55	21.55	57.93	77.38	178.56	36.86	38.94	49.21
49455.50	33.53	21.53	57.91	77.36	178.54	36.84	38.91	49.19
49454.50	33.50	21.51	57.89	77.34	178.51	36.82	38.89	49.17
49453.50	33.48	21.48	57.86	77.31	178.48	36.80	38.87	49.15
49452.50	33.45	21.46	57.84	77.29	178.45	36.77	38.85	49.13
49451.50	33.43	21.44	57.82	77.27	178.43	36.74	38.82	49.11
49450.50	33.40	21.43	57.80	77.25	178.41	36.71	38.80	49.08
49449.50	33.38	21.41	57.77	77.22	178.38	36.69	38.78	49.05
49448.50	33.35	21.39	57.75	77.20	178.36	36.66	38.76	49.03
49447.50	33.33	21.37	57.73	77.18	178.34	36.63	38.74	49.01
49446.50	33.31	21.35	57.71	77.16	178.31	36.61	38.71	48.99
49445.50	33.28	21.33	57.70	77.14	178.29	36.59	38.69	48.97
49444.50	33.26	21.30	57.67	77.12	178.27	36.57	38.67	48.95
49443.50	33.24	21.27	57.65	77.10	178.24	36.55	38.65	48.93
49442.50	33.21	21.25	57.64	77.08	178.22	36.53	38.62	48.91
49441.50	33.19	21.22	57.62	77.06	178.20	36.51	38.59	48.88
49440.50	33.17	21.20	57.59	77.03	178.17	36.49	38.56	48.86
49439.50	33.15	21.18	57.56	77.00	178.14	36.46	38.54	48.83
49438.50	33.12	21.16	57.53	76.98	178.11	36.44	38.52	48.81
49437.50	33.10	21.14	57.51	76.96	178.09	36.42	38.49	48.79
49436.50	33.07	21.12	57.48	76.93	178.06	36.40	38.47	48.77
49435.50	33.05	21.09	57.46	76.90	178.03	36.38	38.44	48.75
49434.50	33.03	21.06	57.43	76.88	178.01	36.35	38.43	48.72
49433.50	33.00	21.04	57.41	76.86	177.99	36.33	38.41	48.70
49432.50	32.98	21.02	57.39	76.83	177.96	36.30	38.38	48.68
49431.50	32.95	20.99	57.36	76.81	177.93	36.28	38.36	48.66
49430.50	32.93	20.97	57.34	76.78	177.91	36.25	38.33	48.63
49429.50	32.91	20.95	57.32	76.76	177.88	36.23	38.30	48.61
49428.50	32.88	20.93	57.30	76.74	177.86	36.20	38.28	48.59
49427.50	32.86	20.91	57.28	76.72	177.84	36.18	38.26	48.57
49426.50	32.84	20.88	57.26	76.70	177.81	36.16	38.24	48.55
49425.50	32.81	20.86	57.24	76.68	177.79	36.13	38.22	48.53
49424.50	32.79	20.84	57.21	76.65	177.76	36.11	38.21	48.50
49423.50	32.76	20.81	57.19	76.63	177.74	36.09	38.19	48.48
49422.50	32.73	20.79	57.17	76.61	177.71	36.07	38.17	48.46
49421.50	32.71	20.77	57.14	76.58	177.69	36.05	38.14	48.43
49420.50	32.68	20.75	57.12	76.56	177.66	36.03	38.12	48.41
49419.50	32.66	20.72	57.10	76.53	177.63	36.01	38.10	48.39
49418.50	32.63	20.70	57.07	76.51	177.60	35.98	38.08	48.37
49417.50	32.61	20.67	57.05	76.49	177.58	35.95	38.06	48.35
49416.50	32.58	20.65	57.03	76.46	177.55	35.93	38.03	48.32
49415.50	32.56	20.63	57.00	76.44	177.52	35.90	38.01	48.30
49414.50	32.53	20.61	56.97	76.41	177.49	35.88	37.99	48.27
49413.50	32.51	20.58	56.95	76.39	177.47	35.86	37.97	48.25
49412.50	32.48	20.56	56.93	76.36	177.44	35.83	37.95	48.23
49411.50	32.45	20.54	56.91	76.34	177.42	35.81	37.92	48.21
49410.50	32.43	20.51	56.89	76.32	177.40	35.79	37.90	48.18
49409.50	32.40	20.49	56.86	76.30	177.37	35.76	37.88	48.16
49408.50	32.38	20.47	56.84	76.27	177.34	35.73	37.85	48.14
49407.50	32.35	20.45	56.82	76.25	177.32	35.70	37.83	48.11
49406.50	32.32	20.43	56.80	76.23	177.30	35.68	37.81	48.09
49405.50	32.30	20.41	56.77	76.21	177.27	35.65	37.79	48.06
49404.50	32.27	20.39	56.75	76.18	177.24	35.63	37.77	48.04
49403.50	32.25	20.36	56.73	76.16	177.22	35.61	37.74	48.02
49402.50	32.23	20.34	56.71	76.14	177.19	35.59	37.72	48.00
49401.50	32.20	20.32	56.69	76.11	177.17	35.56	37.69	47.97
49400.50	32.18	20.30	56.66	76.09	177.14	35.54	37.67	47.95
49399.50	32.16	20.27	56.64	76.06	177.11	35.51	37.64	47.93
49398.50	32.13	20.24	56.61	76.04	177.08	35.49	37.62	47.90
49397.50	32.11	20.22	56.59	76.02	177.06	35.46	37.59	47.88
49396.50	32.09	20.19	56.56	75.99	177.03	35.44	37.57	47.85
49395.50	32.07	20.17	56.54	75.97	177.01	35.41	37.55	47.83
49394.50	32.04	20.14	56.52	75.94	176.98	35.39	37.53	47.80
49393.50	32.02	20.12	56.49	75.92	176.96	35.36	37.50	47.78
49392.50	31.99	20.09	56.46	75.89	176.92	35.34	37.48	47.76
49391.50	31.97	20.07	56.44	75.86	176.89	35.32	37.46	47.74
49390.50	31.94	20.04	56.42	75.84	176.87	35.30	37.44	47.71
49389.50	31.92	20.02	56.39	75.82	176.84	35.27	37.42	47.69
49388.50	31.89	20.00	56.36	75.79	176.81	35.25	37.39	47.67
49387.50	31.87	19.97	56.34	75.76	176.79	35.22	37.37	47.64
49386.50	31.85	19.95	56.31	75.74	176.76	35.19	37.35	47.62
49385.50	31.83	19.93	56.29	75.72	176.74	35.17	37.33	47.60
49384.50	31.80	19.90	56.27	75.69	176.71	35.15	37.31	47.57
49383.50	31.78	19.88	56.24	75.67	176.68	35.13	37.28	47.55
49382.50	31.75	19.85	56.22	75.64	176.66	35.11	37.25	47.52
49381.50	31.73	19.83	56.20	75.62	176.63	35.08	37.23	47.50
49380.50	31.70	19.81	56.18	75.60	176.60	35.05	37.20	47.47
49379.50	31.68	19.78	56.16	75.58	176.58	35.03	37.18	47.45
49378.50	31.65	19.76	56.13	75.55	176.55	35.01	37.15	47.42
49377.50	31.63	19.74	56.11	75.53	176.53	34.99	37.13	47.40
49376.50	31.60	19.71	56.09	75.51	176.50	34.96	37.10	47.38
49375.50	31.58	19.69	56.07	75.48	176.47	34.94	37.08	47.35
49374.50	31.55	19.67	56.04	75.46	176.45	34.91	37.06	47.33
49373.50	31.52	19.65	56.02	75.44	176.42	34.88	37.04	47.31
49372.50	31.50	19.63	56.00	75.41	176.39	34.86	37.01	47.28
49371.50	31.47	19.60	55.97	75.39	176.37	34.83	36.99	47.26
49370.50	31.44	19.58	55.95	75.36	176.34	34.81	36.97	47.23
49369.50	31.41	19.55	55.92	75.33	176.31	34.79	36.95	47.21
49368.50	31.39	19.53	55.90	75.31	176.28	34.77	36.92	47.18
49367.50	31.36	19.51	55.87	75.28	176.25	34.74	36.90	47.16
49366.50	31.33	19.48	55.85	75.26	176.22	34.72	36.88	47.14
49365.50	31.31	19.46	55.83	75.24	176.20	34.70	36.85	47.12
49364.50	31.28	19.44	55.81	75.22	176.17	34.68	36.82	47.09
49363.50	31.25	19.41	55.79	75.19	176.14	34.65	36.80	47.07
49362.50	31.23	19.39	55.76	75.17	176.12	34.63	36.78	47.04
49361.50	31.21	19.37	55.74	75.14	176.09	34.60	36.76	47.02
49360.50	31.18	19.34	55.71	75.12	176.06	34.58	36.73	46.99
49359.50	31.16	19.32	55.69	75.09	176.04	34.55	36.70	46.96
49358.50	31.13	19.30	55.66	75.07	176.01	34.53	36.67	46.94
49357.50	31.10	19.27	55.64	75.04	175.99	34.50	36.66	46.92
49356.50	31.08	19.24	55.60	75.01	175.95	34.48	36.64	46.90
49355.50	31.05	19.22	55.58	74.98	175.92	34.45	36.61	46.88
49354.50	31.02	19.19	55.56	74.96	175.90	34.43	36.59	46.85
49353.50	31.00	19.17	55.53	74.94	175.87	34.40	36.56	46.82
49352.50	30.97	19.15	55.50	74.91	175.84	34.38	36.53	46.80
49351.50	30.95	19.12	55.48	74.88	175.81	34.36	36.50	46.78
49350.50	30.92	19.10	55.45	74.86	175.79	34.33	36.48	46.75
49349.50	30.90	19.07	55.43	74.83	175.76	34.30	36.46	46.73
49348.50	30.87	19.05	55.40	74.81	175.73	34.28	36.43	46.70
49347.50	30.85	19.03	55.38	74.78	175.70	34.25	36.40	46.68
49346.50	30.82	19.01	55.35	74.76	175.68	34.23	36.37	46.65
49345.50	30.80	18.98	55.33	74.73	175.65	34.20	36.34	46.63
49344.50	30.78	18.96	55.31	74.71	175.63	34.18	36.31	46.61
49343.50	30.75	18.94	55.29	74.69	175.60	34.15	36.29	46.59
49342.50	30.72	18.92	55.26	74.66	175.57	34.12	36.27	46.56
49341.50	30.70	18.89	55.24	74.64	175.55	34.10	36.25	46.53
49340.50	30.67	18.87	55.22	74.62	175.52	34.08	36.23	46.51
49339.50	30.65	18.84	55.20	74.59	175.49	34.05	36.21	46.48
49338.50	30.62	18.82	55.17	74.57	175.47	34.03	36.19	46.46
49337.50	30.59	18.79	55.15	74.55	175.44	34.01	36.17	46.43
49336.50	30.56	18.77	55.12	74.52	175.41	33.99	36.14	46.40
49335.50	30.54	18.74	55.10	74.49	175.38	33.96	36.12	46.38
49334.50	30.51	18.72	55.08	74.47	175.36	33.93	36.09	46.36
49333.50	30.49	18.69	55.05	74.45	175.33	33.90	36.07	46.33
49332.50	30.46	18.67	55.03	74.42	175.30	33.88	36.05	46.31
49331.50	30.43	18.65	55.00	74.39	175.27	33.86	36.02	46.29
49330.50	30.41	18.62	54.98	74.37	175.24	33.84	36.00	46.26
49329.50	30.38	18.59	54.95	74.34	175.22	33.82	35.97	46.23
49328.50	30.36	18.57	54.92	74.31	175.18	33.80	35.95	46.21
49327.50	30.33	18.54	54.89	74.28	175.15	33.78	35.92	46.19
49326.50	30.30	18.52	54.87	74.26	175.13	33.75	35.90	46.16
49325.50	30.28	18.50	54.85	74.24	175.10	33.73	35.88	46.13
49324.50	30.25	18.47	54.82	74.21	175.07	33.70	35.86	46.11
49323.50	30.23	18.44	54.79	74.18	175.04	33.68	35.84	46.08
49322.50	30.20	18.42	54.77	74.16	175.02	33.65	35.81	46.06
49321.50	30.17	18.39	54.75	74.14	174.99	33.63	35.79	46.04
49320.50	30.15	18.37	54.73	74.11	174.96	33.60	35.77	46.02
49319.50	30.12	18.34	54.70	74.09	174.93	33.57	35.74	45.99
49318.50	30.10	18.31	54.68	74.07	174.91	33.55	35.71	45.97
49317.50	30.07	18.29	54.66	74.04	174.88	33.52	35.68	45.94
49316.50	30.04	18.27	54.64	74.02	174.86	33.50	35.66	45.92
49315.50	30.01	18.25	54.61	73.99	174.82	33.48	35.63	45.90
49314.50	29.99	18.22	54.59	73.97	174.80	33.46	35.61	45.87
49313.50	29.97	18.20	54.56	73.94	174.77	33.44	35.59	45.84
49312.50	29.94	18.17	54.54	73.92	174.74	33.41	35.56	45.82
49311.50	29.92	18.15	54.51	73.89	174.71	33.39	35.55	45.80
49310.50	29.89	18.13	54.49	73.87	174.68	33.36	35.53	45.77
49309.50	29.87	18.12	54.46	73.84	174.66	33.33	35.51	45.74
49308.50	29.84	18.10	54.43	73.81	174.62	33.30	35.48	45.72
49307.50	29.81	18.08	54.40	73.78	174.59	33.27	35.45	45.69
49306.50	29.79	18.05	54.37	73.75	174.56	33.24	35.42	45.66
49305.50	29.76	18.02	54.35	73.73	174.54	33.22	35.40	45.64
49304.50	29.73	18.00	54.32	73.69	174.50	33.19	35.37	45.62
49303.50	29.71	17.97	54.29	73.67	174.47	33.16	35.35	45.59
49302.50	29.68	17.95	54.26	73.64	174.44	33.14	35.33	45.56
49301.50	29.66	17.93	54.24	73.61	174.41	33.11	35.31	45.53
49300.50	29.63	17.90	54.21	73.59	174.39	33.08	35.28	45.51
49299.50	29.61	17.87	54.19	73.57	174.36	33.06	35.26	45.49
49298.50	29.58	17.86	54.17	73.54	174.33	33.04	35.24	45.46
49297.50	29.55	17.83	54.15	73.52	174.31	33.02	35.21	45.44
49296.50	29.53	17.80	54.12	73.50	174.28	32.99	35.19	45.41
49295.50	29.50	17.78	54.10	73.47	174.25	32.97	35.16	45.38
49294.50	29.47	17.75	54.07	73.44	174.22	32.94	35.14	45.35
49293.50	29.45	17.72	54.05	73.42	174.20	32.92	35.11	45.33
49292.50	29.43	17.70	54.02	73.39	174.17	32.89	35.09	45.31
49291.50	29.40	17.67	54.00	73.37	174.14	32.87	35.07	45.28
49290.50	29.38	17.64	53.98	73.35	174.11	32.84	35.05	45.26
49289.50	29.35	17.62	53.95	73.32	174.09	32.81	35.02	45.23
49288.50	29.32	17.60	53.92	73.29	174.05	32.78	34.99	45.21
49287.50	29.29	17.58	53.88	73.25	174.01	32.76	34.97	45.18
49286.50	29.27	17.55	53.85	73.22	173.98	32.74	34.95	45.16
49285.50	29.25	17.53	53.82	73.19	173.95	32.72	34.93	45.13
49284.50	29.22	17.50	53.79	73.16	173.92	32.69	34.90	45.11
49283.50	29.19	17.47	53.77	73.13	173.89	32.67	34.88	45.08
49282.50	29.17	17.44	53.74	73.11	173.86	32.64	34.85	45.06
49281.50	29.14	17.42	53.72	73.08	173.84	32.61	34.83	45.03
49280.50	29.12	17.39	53.69	73.06	173.81	32.58	34.81	45.01
49279.50	29.09	17.37	53.67	73.04	173.78	32.56	34.79	44.98
49278.50	29.07	17.35	53.65	73.01	173.76	32.53	34.76	44.96
49277.50	29.04	17.32	53.63	72.99	173.73	32.50	34.73	44.94
49276.50	29.02	17.30	53.61	72.97	173.70	32.48	34.70	44.92
49275.50	28.99	17.28	53.58	72.94	173.67	32.46	34.68	44.89
49274.50	28.96	17.25	53.56	72.92	173.65	32.43	34.65	44.87
49273.50	28.94	17.23	53.53	72.89	173.62	32.40	34.63	44.84
49272.50	28.91	17.21	53.51	72.87	173.59	32.38	34.61	44.81
49271.50	28.88	17.18	53.48	72.84	173.56	32.36	34.58	44.78
49270.50	28.86	17.16	53.45	72.82	173.54	32.33	34.56	44.76
49269.50	28.83	17.14	53.43	72.79	173.51	32.31	34.53	44.74
49268.50	28.80	17.11	53.40	72.76	173.48	32.29	34.51	44.71
49267.50	28.78	17.09	53.37	72.73	173.44	32.26	34.49	44.69
49266.50	28.76	17.06	53.34	72.70	173.42	32.23	34.46	44.66
49265.50	28.73	17.04	53.32	72.68	173.39	32.21	34.44	44.64
49264.50	28.70	17.01	53.28	72.64	173.35	32.18	34.42	44.61
49263.50	28.67	16.99	53.26	72.61	173.32	32.16	34.39	44.59
49262.50	28.65	16.96	53.23	72.59	173.29	32.14	34.37	44.56
49261.50	28.62	16.94	53.21	72.57	173.27	32.12	34.34	44.54
49260.50	28.60	16.91	53.19	72.54	173.24	32.09	34.31	44.51
49259.50	28.57	16.88	53.17	72.52	173.22	32.06	34.29	44.49
49258.50	28.54	16.86	53.14	72.50	173.19	32.04	34.26	44.46
49257.50	28.52	16.83	53.12	72.47	173.16	32.01	34.23	44.44
49256.50	28.49	16.81	53.09	72.45	173.13	31.98	34.21	44.41
49255.50	28.47	16.78	53.07	72.42	173.10	31.96	34.19	44.38
49254.50	28.44	16.76	53.04	72.40	173.08	31.93	34.16	44.36
49253.50	28.42	16.73	53.02	72.37	173.05	31.91	34.14	44.33
49252.50	28.39	16.71	52.99	72.35	173.02	31.89	34.12	44.31
49251.50	28.37	16.68	52.96	72.31	172.99	31.87	34.10	44.28
49250.50	28.34	16.66	52.93	72.29	172.96	31.84	34.08	44.25
49249.50	28.31	16.63	52.91	72.26	172.93	31.82	34.05	44.23
49248.50	28.29	16.61	52.88	72.23	172.90	31.79	34.02	44.20
49247.50	28.26	16.58	52.85	72.20	172.87	31.77	34.00	44.18
49246.50	28.24	16.56	52.82	72.17	172.84	31.74	33.97	44.15
49245.50	28.21	16.53	52.80	72.15	172.81	31.72	33.95	44.13
49244.50	28.18	16.51	52.77	72.12	172.79	31.69	33.93	44.10
49243.50	28.16	16.50	52.75	72.10	172.76	31.66	33.91	44.08
49242.50	28.13	16.47	52.72	72.07	172.73	31.63	33.89	44.06
49241.50	28.10	16.45	52.70	72.05	172.70	31.60	33.86	44.03
49240.50	28.07	16.43	52.68	72.02	172.67	31.58	33.84	44.00
49239.50	28.05	16.41	52.65	71.99	172.64	31.55	33.82	43.98
49238.50	28.02	16.38	52.63	71.97	172.61	31.53	33.79	43.96
49237.50	28.00	16.36	52.60	71.95	172.59	31.50	33.77	43.94
49236.50	27.97	16.33	52.58	71.92	172.56	31.47	33.74	43.91
49235.50	27.95	16.30	52.56	71.90	172.53	31.44	33.72	43.89
49234.50	27.92	16.28	52.53	71.87	172.50	31.42	33.69	43.86
49233.50	27.89	16.25	52.51	71.85	172.47	31.40	33.66	43.84
49232.50	27.87	16.23	52.48	71.82	172.45	31.38	33.64	43.82
49231.50	27.84	16.20	52.46	71.80	172.42	31.36	33.61	43.79
49230.50	27.82	16.18	52.43	71.77	172.39	31.34	33.59	43.77
49229.50	27.79	16.15	52.40	71.74	172.36	31.32	33.56	43.74
49228.50	27.77	16.13	52.38	71.72	172.33	31.29	33.55	43.72
49227.50	27.75	16.10	52.35	71.69	172.30	31.26	33.53	43.69
49226.50	27.72	16.08	52.33	71.67	172.28	31.23	33.51	43.66
49225.50	27.70	16.05	52.31	71.64	172.25	31.21	33.48	43.64
49224.50	27.67	16.03	52.28	71.62	172.22	31.18	33.46	43.61
49223.50	27.65	16.00	52.26	71.59	172.19	31.15	33.43	43.58
49222.50	27.62	15.98	52.23	71.57	172.17	31.13	33.41	43.56
49221.50	27.59	15.95	52.20	71.54	172.14	31.10	33.38	43.54
49220.50	27.56	15.93	52.18	71.51	172.11	31.08	33.36	43.52
49219.50	27.54	15.90	52.15	71.49	172.08	31.06	33.34	43.49
49218.50	27.51	15.88	52.13	71.46	172.06	31.03	33.31	43.46
49217.50	27.49	15.85	52.11	71.44	172.03	31.01	33.29	43.44
49216.50	27.47	15.83	52.08	71.42	172.00	30.98	33.27	43.42
49215.50	27.44	15.81	52.06	71.39	171.97	30.96	33.24	43.40
49214.50	27.42	15.78	52.03	71.36	171.94	30.94	33.22	43.37
49213.50	27.39	15.76	52.00	71.34	171.92	30.91	33.19	43.35
49212.50	27.36	15.74	51.98	71.31	171.89	30.89	33.17	43.33
49211.50	27.34	15.72	51.95	71.28	171.86	30.87	33.15	43.30
49210.50	27.32	15.70	51.92	71.25	171.83	30.84	33.12	43.28
49209.50	27.29	15.68	51.90	71.23	171.81	30.82	33.09	43.25
49208.50	27.26	15.66	51.88	71.21	171.78	30.79	33.07	43.23
49207.50	27.24	15.64	51.85	71.18	171.75	30.77	33.05	43.20
49206.50	27.21	15.61	51.83	71.15	171.72	30.75	33.03	43.18
49205.50	27.19	15.59	51.80	71.13	171.69	30.73	33.00	43.16
49204.50	27.16	15.57	51.78	71.11	171.67	30.71	32.98	43.14
49203.50	27.14	15.55	51.76	71.09	171.64	30.69	32.96	43.11
49202.50	27.11	15.52	51.74	71.06	171.62	30.66	32.93	43.09
49201.50	27.09	15.50	51.72	71.04	171.59	30.64	32.90	43.07
49200.50	27.06	15.48	51.70	71.02	171.57	30.61	32.88	43.04
49199.50	27.04	15.45	51.67	71.00	171.54	30.59	32.86	43.02
49198.50	27.02	15.43	51.65	70.97	171.52	30.56	32.84	43.00
49197.50	26.99	15.40	51.63	70.95	171.49	30.54	32.81	42.97
49196.50	26.96	15.38	51.60	70.93	171.47	30.52	32.79	42.95
49195.50	26.94	15.35	51.58	70.90	171.44	30.50	32.76	42.93
49194.50	26.91	15.34	51.56	70.88	171.41	30.48	32.74	42.90
49193.50	26.88	15.31	51.53	70.85	171.39	30.45	32.71	42.88
49192.50	26.86	15.29	51.51	70.83	171.36	30.43	32.69	42.85
49191.50	26.83	15.26	51.48	70.80	171.33	30.40	32.67	42.83
49190.50	26.81	15.24	51.45	70.77	171.30	30.38	32.65	42.80
49189.50	26.78	15.22	51.43	70.75	171.27	30.35	32.63	42.78
49188.50	26.76	15.20	51.40	70.72	171.25	30.33	32.61	42.75
49187.50	26.74	15.17	51.37	70.69	171.21	30.30	32.59	42.73
49186.50	26.71	15.14	51.35	70.67	171.19	30.28	32.57	42.70
49185.50	26.69	15.12	51.33	70.65	171.16	30.25	32.55	42.68
49184.50	26.67	15.10	51.30	70.62	171.14	30.23	32.53	42.66
49183.50	26.65	15.08	51.28	70.60	171.11	30.21	32.51	42.63
49182.50	26.62	15.05	51.25	70.57	171.08	30.19	32.48	42.61
49181.50	26.59	15.03	51.23	70.55	171.05	30.17	32.45	42.59
49180.50	26.57	15.00	51.21	70.53	171.03	30.14	32.42	42.57
49179.50	26.55	14.98	51.19	70.51	171.00	30.12	32.40	42.54
49178.50	26.53	14.95	51.17	70.49	170.98	30.09	32.38	42.53
49177.50	26.50	14.93	51.15	70.47	170.96	30.07	32.36	42.51
49176.50	26.48	14.91	51.13	70.45	170.93	30.05	32.34	42.49
49175.50	26.45	14.89	51.11	70.42	170.91	30.03	32.32	42.46
49174.50	26.43	14.87	51.08	70.39	170.88	30.01	32.30	42.44
49173.50	26.40	14.86	51.06	70.37	170.85	29.98	32.28	42.41
49172.50	26.38	14.84	51.04	70.35	170.83	29.96	32.26	42.39
49171.50	26.36	14.82	51.02	70.33	170.80	29.93	32.24	42.37
49170.50	26.33	14.80	51.00	70.31	170.78	29.90	32.22	42.34
49169.50	26.31	14.78	50.98	70.28	170.75	29.88	32.19	42.32
49168.50	26.28	14.75	50.95	70.26	170.73	29.85	32.17	42.30
49167.50	26.26	14.73	50.92	70.23	170.70	29.83	32.15	42.28
49166.50	26.23	14.70	50.90	70.21	170.67	29.81	32.12	42.26
49165.50	26.21	14.68	50.88	70.18	170.64	29.79	32.09	42.23
49164.50	26.19	14.65	50.85	70.16	170.62	29.77	32.08	42.21
49163.50	26.16	14.63	50.82	70.13	170.59	29.75	32.06	42.18
49162.50	26.14	14.61	50.80	70.11	170.56	29.73	32.03	42.16
49161.50	26.12	14.59	50.78	70.08	170.53	29.71	32.01	42.14
49160.50	26.09	14.57	50.76	70.06	170.51	29.69	31.99	42.11
49159.50	26.07	14.55	50.74	70.04	170.49	29.67	31.97	42.10
49158.50	26.04	14.53	50.72	70.02	170.46	29.64	31.95	42.08
49157.50	26.02	14.51	50.70	70.00	170.44	29.62	31.93	42.06
49156.50	25.99	14.49	50.67	69.98	170.41	29.60	31.90	42.03
49155.50	25.97	14.47	50.66	69.96	170.39	29.58	31.89	42.01
49154.50	25.95	14.45	50.63	69.93	170.37	29.56	31.87	41.99
49153.50	25.93	14.42	50.60	69.91	170.34	29.54	31.85	41.97
49152.50	25.90	14.40	50.58	69.88	170.31	29.53	31.83	41.95
49151.50	25.88	14.38	50.56	69.86	170.29	29.51	31.80	41.93
49150.50	25.86	14.35	50.54	69.84	170.27	29.48	31.78	41.91
49149.50	25.84	14.33	50.51	69.81	170.24	29.46	31.75	41.89
49148.50	25.82	14.32	50.49	69.79	170.21	29.44	31.73	41.87
49147.50	25.80	14.29	50.47	69.77	170.19	29.42	31.71	41.85
49146.50	25.78	14.27	50.45	69.75	170.16	29.40	31.69	41.83
49145.50	25.75	14.25	50.43	69.73	170.14	29.38	31.67	41.81
49144.50	25.73	14.23	50.41	69.71	170.12	29.36	31.65	41.79
49143.50	25.70	14.20	50.39	69.69	170.09	29.34	31.63	41.77
49142.50	25.68	14.18	50.37	69.67	170.07	29.32	31.61	41.75
49141.50	25.66	14.16	50.35	69.65	170.05	29.30	31.59	41.73
49140.50	25.64	14.14	50.33	69.63	170.02	29.28	31.57	41.71
49139.50	25.62	14.12	50.31	69.61	170.00	29.25	31.55	41.69
49138.50	25.59	14.10	50.29	69.59	169.98	29.23	31.53	41.67
49137.50	25.57	14.08	50.27	69.56	169.96	29.21	31.51	41.64
49136.50	25.55	14.05	50.24	69.54	169.93	29.19	31.49	41.62
49135.50	25.52	14.03	50.22	69.51	169.90	29.17	31.47	41.61
49134.50	25.50	14.01	50.20	69.49	169.88	29.15	31.45	41.59
49133.50	25.48	13.99	50.18	69.47	169.86	29.13	31.44	41.57
49132.50	25.46	13.97	50.16	69.45	169.83	29.11	31.42	41.55
49131.50	25.44	13.96	50.13	69.42	169.80	29.08	31.39	41.52
49130.50	25.42	13.94	50.11	69.40	169.78	29.06	31.37	41.51
49129.50	25.39	13.92	50.09	69.38	169.75	29.04	31.35	41.49
49128.50	25.37	13.90	50.07	69.36	169.73	29.02	31.34	41.47
49127.50	25.36	13.88	50.06	69.34	169.71	29.00	31.32	41.45
49126.50	25.34	13.86	50.04	69.32	169.69	28.98	31.30	41.43
49125.50	25.32	13.85	50.02	69.30	169.67	28.96	31.28	41.42
49124.50	25.29	13.83	50.00	69.29	169.65	28.94	31.26	41.40
49123.50	25.27	13.81	49.98	69.27	169.62	28.92	31.24	41.38
49122.50	25.25	13.79	49.96	69.25	169.60	28.90	31.22	41.36
49121.50	25.22	13.77	49.94	69.23	169.58	28.88	31.21	41.34
49120.50	25.20	13.75	49.92	69.21	169.56	28.86	31.19	41.32
49119.50	25.18	13.72	49.90	69.18	169.53	28.83	31.17	41.31
49118.50	25.15	13.70	49.88	69.16	169.51	28.81	31.15	41.29
49117.50	25.13	13.68	49.86	69.15	169.49	28.79	31.13	41.26
49116.50	25.11	13.66	49.84	69.12	169.46	28.77	31.12	41.24
49115.50	25.09	13.64	49.82	69.10	169.44	28.75	31.10	41.23
49114.50	25.07	13.62	49.80	69.08	169.42	28.73	31.08	41.21
49113.50	25.05	13.61	49.78	69.07	169.40	28.70	31.06	41.19
49112.50	25.03	13.59	49.76	69.05	169.37	28.68	31.04	41.17
49111.50	25.00	13.57	49.75	69.03	169.35	28.66	31.02	41.16
49110.50	24.98	13.55	49.73	69.01	169.33	28.65	31.00	41.14
49109.50	24.97	13.54	49.71	68.99	169.31	28.63	30.98	41.12
49108.50	24.95	13.52	49.69	68.97	169.29	28.61	30.96	41.10
49107.50	24.93	13.50	49.67	68.95	169.27	28.60	30.94	41.08
49106.50	24.90	13.49	49.65	68.93	169.25	28.58	30.93	41.06
49105.50	24.88	13.47	49.64	68.91	169.23	28.57	30.91	41.04
49104.50	24.86	13.45	49.62	68.90	169.21	28.55	30.89	41.03
49103.50	24.84	13.43	49.60	68.88	169.18	28.52	30.88	41.01
49102.50	24.82	13.41	49.58	68.86	169.16	28.50	30.86	40.99
49101.50	24.80	13.39	49.57	68.84	169.14	28.48	30.84	40.98
49100.50	24.78	13.37	49.55	68.82	169.12	28.46	30.82	40.96
49099.50	24.76	13.35	49.53	68.81	169.10	28.44	30.80	40.94
49098.50	24.75	13.33	49.51	68.79	169.08	28.42	30.78	40.92
49097.50	24.73	13.30	49.50	68.77	169.06	28.41	30.77	40.90
49096.50	24.71	13.29	49.48	68.75	169.04	28.38	30.75	40.89
49095.50	24.69	13.27	49.46	68.74	169.02	28.37	30.73	40.87
49094.50	24.67	13.25	49.45	68.72	169.00	28.36	30.71	40.85
49093.50	24.66	13.23	49.43	68.70	168.98	28.34	30.69	40.83
49092.50	24.64	13.22	49.41	68.69	168.97	28.33	30.67	40.81
49091.50	24.62	13.20	49.39	68.67	168.95	28.31	30.66	40.79
49090.50	24.60	13.18	49.38	68.65	168.93	28.30	30.65	40.77
49089.50	24.58	13.16	49.36	68.63	168.91	28.29	30.64	40.76
49088.50	24.56	13.14	49.34	68.61	168.89	28.27	30.62	40.73
49087.50	24.54	13.12	49.32	68.60	168.87	28.26	30.61	40.71
49086.50	24.52	13.11	49.31	68.58	168.85	28.23	30.59	40.70
49085.50	24.50	13.09	49.30	68.57	168.84	28.21	30.57	40.69
49084.50	24.48	13.08	49.28	68.55	168.81	28.19	30.55	40.67
49083.50	24.46	13.06	49.26	68.53	168.79	28.18	30.53	40.66
49082.50	24.44	13.04	49.25	68.52	168.78	28.16	30.52	40.64
49081.50	24.42	13.02	49.23	68.50	168.76	28.15	30.50	40.63
49080.50	24.40	13.00	49.22	68.48	168.74	28.14	30.49	40.61
49079.50	24.38	12.99	49.20	68.47	168.72	28.12	30.47	40.60
49078.50	24.36	12.97	49.19	68.45	168.70	28.10	30.45	40.58
49077.50	24.33	12.96	49.17	68.44	168.68	28.08	30.44	40.56
49076.50	24.31	12.94	49.15	68.42	168.67	28.06	30.43	40.54
49075.50	24.30	12.93	49.14	68.41	168.65	28.04	30.41	40.53
49074.50	24.28	12.91	49.12	68.39	168.64	28.02	30.40	40.51
49073.50	24.26	12.90	49.10	68.37	168.61	28.00	30.38	40.50
49072.50	24.24	12.88	49.08	68.35	168.59	27.98	30.37	40.48
49071.50	24.22	12.86	49.07	68.34	168.58	27.96	30.36	40.46
49070.50	24.20	12.84	49.05	68.32	168.56	27.95	30.34	40.44
49069.50	24.18	12.82	49.03	68.30	168.54	27.94	30.33	40.43
49068.50	24.16	12.80	49.02	68.29	168.52	27.92	30.32	40.42
49067.50	24.14	12.78	49.00	68.27	168.51	27.90	30.31	40.40
49066.50	24.13	12.77	48.99	68.26	168.49	27.88	30.29	40.39
49065.50	24.11	12.76	48.98	68.25	168.47	27.86	30.28	40.37
49064.50	24.10	12.74	48.97	68.23	168.46	27.85	30.26	40.36
49063.50	24.08	12.73	48.95	68.22	168.44	27.83	30.25	40.34
49062.50	24.06	12.71	48.94	68.21	168.42	27.81	30.23	40.33
49061.50	24.04	12.70	48.93	68.19	168.41	27.80	30.22	40.31
49060.50	24.02	12.68	48.91	68.18	168.39	27.78	30.21	40.30
49059.50	24.00	12.67	48.90	68.16	168.37	27.77	30.19	40.28
49058.50	23.98	12.65	48.88	68.15	168.36	27.75	30.17	40.26
49057.50	23.96	12.63	48.87	68.13	168.34	27.73	30.15	40.25
49056.50	23.95	12.62	48.85	68.12	168.32	27.72	30.13	40.23
49055.50	23.93	12.60	48.84	68.10	168.30	27.70	30.11	40.22
49054.50	23.91	12.59	48.82	68.08	168.28	27.69	30.09	40.21
49053.50	23.89	12.58	48.81	68.07	168.27	27.68	30.07	40.20
49052.50	23.88	12.56	48.79	68.05	168.25	27.67	30.05	40.18
49051.50	23.86	12.54	48.77	68.03	168.23	27.66	30.03	40.17
49050.50	23.85	12.53	48.76	68.02	168.22	27.65	30.02	40.16
49049.50	23.83	12.52	48.75	68.01	168.20	27.64	30.00	40.15
49048.50	23.82	12.51	48.73	67.99	168.18	27.63	29.98	40.13
49047.50	23.80	12.49	48.72	67.98	168.17	27.61	29.97	40.12
49046.50	23.78	12.48	48.71	67.97	168.15	27.60	29.96	40.11
49045.50	23.77	12.46	48.70	67.96	168.14	27.59	29.94	40.10
49044.50	23.75	12.44	48.69	67.95	168.13	27.57	29.93	40.09
49043.50	23.73	12.43	48.67	67.93	168.11	27.56	29.91	40.07
49042.50	23.72	12.41	48.66	67.92	168.09	27.54	29.90	40.06
49041.50	23.70	12.40	48.65	67.91	168.08	27.52	29.89	40.05
49040.50	23.68	12.39	48.64	67.90	168.07	27.50	29.88	40.04
49039.50	23.67	12.37	48.63	67.89	168.05	27.49	29.87	40.03
49038.50	23.66	12.36	48.62	67.87	168.03	27.47	29.86	40.02
49037.50	23.65	12.34	48.61	67.86	168.02	27.46	29.85	40.00
49036.50	23.63	12.33	48.60	67.85	168.00	27.45	29.84	39.99
49035.50	23.62	12.31	48.58	67.84	167.98	27.43	29.83	39.98
49034.50	23.60	12.30	48.57	67.82	167.96	27.43	29.81	39.96
49033.50	23.58	12.28	48.56	67.81	167.95	27.42	29.80	39.95
49032.50	23.57	12.27	48.55	67.80	167.94	27.41	29.79	39.93
49031.50	23.55	12.26	48.54	67.79	167.92	27.39	29.78	39.93
49030.50	23.53	12.24	48.53	67.78	167.91	27.37	29.77	39.92
49029.50	23.52	12.23	48.52	67.77	167.89	27.35	29.76	39.91
49028.50	23.50	12.22	48.51	67.76	167.88	27.34	29.75	39.89
49027.50	23.49	12.21	48.50	67.75	167.87	27.33	29.74	39.88
49026.50	23.47	12.20	48.49	67.74	167.86	27.31	29.73	39.88
49025.50	23.46	12.18	48.48	67.73	167.84	27.30	29.72	39.87
49024.50	23.44	12.17	48.47	67.72	167.83	27.29	29.71	39.86
49023.50	23.43	12.16	48.47	67.71	167.82	27.27	29.70	39.84
49022.50	23.42	12.14	48.46	67.70	167.81	27.27	29.69	39.83
49021.50	23.41	12.13	48.45	67.69	167.79	27.25	29.68	39.82
49020.50	23.39	12.11	48.44	67.68	167.78	27.24	29.66	39.81
49019.50	23.37	12.10	48.42	67.67	167.77	27.23	29.66	39.80
49018.50	23.36	12.09	48.41	67.65	167.75	27.21	29.65	39.80
49017.50	23.34	12.07	48.40	67.64	167.74	27.20	29.64	39.78
49016.50	23.33	12.06	48.39	67.63	167.73	27.18	29.64	39.77
49015.50	23.31	12.05	48.37	67.62	167.71	27.17	29.62	39.76
49014.50	23.30	12.04	48.36	67.60	167.70	27.16	29.61	39.75
49013.50	23.28	12.03	48.35	67.59	167.68	27.16	29.61	39.73
49012.50	23.27	12.01	48.34	67.58	167.67	27.14	29.61	39.72
49011.50	23.25	12.00	48.33	67.57	167.66	27.13	29.60	39.72
49010.50	23.24	11.99	48.32	67.56	167.65	27.12	29.59	39.71
49009.50	23.22	11.97	48.31	67.56	167.64	27.12	29.58	39.70
49008.50	23.21	11.96	48.31	67.55	167.63	27.12	29.57	39.69
49007.50	23.19	11.95	48.30	67.54	167.62	27.11	29.57	39.69
49006.50	23.18	11.94	48.29	67.53	167.61	27.10	29.56	39.68
49005.50	23.17	11.93	48.28	67.52	167.59	27.09	29.55	39.67
49004.50	23.16	11.92	48.27	67.52	167.58	27.09	29.54	39.66
49003.50	23.14	11.91	48.27	67.51	167.58	27.08	29.52	39.65
49002.50	23.12	11.90	48.26	67.50	167.56	27.07	29.52	39.64
49001.50	23.11	11.89	48.25	67.49	167.55	27.06	29.51	39.63
49000.50	23.10	11.88	48.25	67.49	167.55	27.05	29.50	39.62
48999.50	23.08	11.87	48.24	67.48	167.53	27.03	29.49	39.61
48998.50	23.07	11.87	48.23	67.47	167.52	27.02	29.48	39.60
48997.50	23.06	11.86	48.22	67.46	167.52	27.01	29.47	39.60
48996.50	23.05	11.85	48.21	67.45	167.51	27.01	29.46	39.59
48995.50	23.04	11.83	48.20	67.44	167.49	27.00	29.45	39.59
48994.50	23.03	11.82	48.20	67.44	167.48	26.99	29.45	39.58
48993.50	23.02	11.80	48.19	67.43	167.48	26.98	29.45	39.57
48992.50	23.00	11.80	48.18	67.42	167.47	26.97	29.44	39.56
48991.50	22.99	11.79	48.18	67.42	167.46	26.95	29.42	39.56
48990.50	22.98	11.78	48.17	67.41	167.46	26.94	29.42	39.55
48989.50	22.97	11.77	48.17	67.41	167.45	26.92	29.41	39.55
48988.50	22.96	11.76	48.16	67.40	167.44	26.91	29.41	39.54
48987.50	22.95	11.75	48.15	67.39	167.43	26.91	29.40	39.53
48986.50	22.93	11.74	48.14	67.38	167.42	26.90	29.40	39.52
48985.50	22.92	11.73	48.13	67.37	167.41	26.89	29.39	39.52
48984.50	22.91	11.72	48.12	67.37	167.40	26.89	29.38	39.51
48983.50	22.90	11.71	48.12	67.36	167.40	26.88	29.38	39.51
48982.50	22.89	11.70	48.11	67.35	167.39	26.87	29.37	39.50
48981.50	22.88	11.69	48.10	67.34	167.38	26.86	29.36	39.50
48980.50	22.87	11.69	48.09	67.34	167.37	26.86	29.35	39.49
48979.50	22.85	11.68	48.09	67.33	167.36	26.86	29.34	39.48
48978.50	22.85	11.67	48.08	67.33	167.36	26.85	29.34	39.47
48977.50	22.83	11.67	48.08	67.33	167.35	26.84	29.33	39.47
48976.50	22.82	11.66	48.08	67.32	167.35	26.83	29.32	39.47
48975.50	22.82	11.65	48.08	67.32	167.34	26.82	29.32	39.46
48974.50	22.81	11.65	48.08	67.32	167.34	26.82	29.31	39.46
48973.50	22.79	11.64	48.07	67.31	167.33	26.81	29.30	39.45
48972.50	22.78	11.63	48.07	67.31	167.33	26.80	29.29	39.45
48971.50	22.77	11.62	48.06	67.30	167.32	26.80	29.28	39.45
48970.50	22.76	11.61	48.06	67.30	167.32	26.79	29.27	39.44
48969.50	22.75	11.60	48.06	67.30	167.31	26.78	29.27	39.44
48968.50	22.74	11.59	48.05	67.29	167.30	26.77	29.26	39.43
48967.50	22.73	11.58	48.05	67.29	167.30	26.77	29.26	39.43
48966.50	22.72	11.57	48.05	67.29	167.30	26.76	29.26	39.42
48965.50	22.72	11.57	48.04	67.28	167.29	26.76	29.26	39.42
48964.50	22.71	11.56	48.03	67.28	167.28	26.77	29.25	39.41
48963.50	22.70	11.55	48.03	67.27	167.28	26.77	29.25	39.41
48962.50	22.69	11.55	48.03	67.27	167.27	26.76	29.25	39.40
48961.50	22.68	11.54	48.02	67.27	167.27	26.76	29.25	39.40
48960.50	22.67	11.54	48.02	67.26	167.26	26.75	29.24	39.40
48959.50	22.66	11.53	48.02	67.26	167.26	26.74	29.24	39.40
48958.50	22.65	11.51	48.02	67.26	167.26	26.74	29.24	39.39
48957.50	22.64	11.50	48.01	67.26	167.26	26.73	29.23	39.39
48956.50	22.63	11.50	48.01	67.26	167.25	26.73	29.23	39.39
48955.50	22.63	11.49	48.01	67.25	167.25	26.73	29.23	39.38
48954.50	22.62	11.49	48.01	67.25	167.25	26.71	29.23	39.38
48953.50	22.61	11.48	48.01	67.25	167.25	26.70	29.22	39.38
48952.50	22.60	11.48	48.01	67.25	167.24	26.69	29.21	39.37
48951.50	22.60	11.47	48.01	67.25	167.24	26.69	29.21	39.37
48950.50	22.59	11.46	48.00	67.25	167.24	26.69	29.21	39.37
48949.50	22.58	11.46	48.00	67.25	167.24	26.69	29.21	39.36
48948.50	22.57	11.45	48.00	67.24	167.23	26.68	29.20	39.36
48947.50	22.57	11.45	47.99	67.24	167.23	26.67	29.20	39.36
48946.50	22.56	11.44	47.99	67.24	167.23	26.67	29.20	39.36
48945.50	22.55	11.44	47.99	67.24	167.23	26.66	29.20	39.36
48944.50	22.55	11.44	47.98	67.23	167.22	26.66	29.20	39.35
48943.50	22.54	11.43	47.98	67.23	167.22	26.65	29.20	39.35
48942.50	22.53	11.43	47.98	67.23	167.22	26.65	29.20	39.35
48941.50	22.53	11.42	47.98	67.23	167.22	26.65	29.19	39.34
48940.50	22.52	11.42	47.98	67.23	167.22	26.65	29.19	39.34
48939.50	22.51	11.42	47.99	67.24	167.22	26.65	29.19	39.34
48938.50	22.50	11.42	47.99	67.24	167.23	26.65	29.19	39.34
48937.50	22.50	11.42	47.99	67.24	167.22	26.65	29.19	39.34
48936.50	22.49	11.42	47.98	67.24	167.22	26.65	29.19	39.34
48935.50	22.49	11.41	47.98	67.24	167.22	26.64	29.19	39.34
48934.50	22.48	11.41	47.99	67.24	167.22	26.64	29.20	39.35
48933.50	22.48	11.41	47.99	67.24	167.22	26.64	29.20	39.35
48932.50	22.48	11.40	47.99	67.24	167.22	26.64	29.20	39.35
48931.50	22.47	11.40	47.99	67.24	167.22	26.63	29.20	39.35
48930.50	22.47	11.39	47.99	67.24	167.22	26.63	29.20	39.35
48929.50	22.46	11.39	47.99	67.24	167.22	26.63	29.19	39.35
48928.50	22.46	11.39	47.99	67.24	167.22	26.63	29.19	39.35
48927.50	22.45	11.39	47.99	67.25	167.22	26.63	29.20	39.36
48926.50	22.45	11.39	47.99	67.25	167.22	26.63	29.20	39.36
48925.50	22.44	11.38	47.99	67.25	167.22	26.63	29.19	39.36
48924.50	22.44	11.38	48.00	67.25	167.22	26.63	29.19	39.37
48923.50	22.43	11.37	48.00	67.25	167.22	26.63	29.20	39.37
48922.50	22.43	11.37	48.00	67.26	167.23	26.63	29.19	39.37
48921.50	22.42	11.36	48.00	67.26	167.23	26.63	29.19	39.37
48920.50	22.42	11.35	48.01	67.26	167.23	26.63	29.19	39.37
48919.50	22.41	11.35	48.00	67.26	167.23	26.62	29.19	39.38
48918.50	22.41	11.35	48.01	67.26	167.23	26.62	29.20	39.38
48917.50	22.41	11.35	48.01	67.26	167.23	26.62	29.20	39.38
48916.50	22.40	11.35	48.00	67.26	167.23	26.63	29.21	39.38
48915.50	22.40	11.35	48.01	67.26	167.23	26.63	29.21	39.38
48914.50	22.40	11.34	48.01	67.27	167.23	26.64	29.22	39.39
48913.50	22.39	11.35	48.01	67.27	167.24	26.64	29.22	39.39
48912.50	22.39	11.34	48.01	67.27	167.23	26.63	29.22	39.39
48911.50	22.39	11.34	48.01	67.27	167.23	26.64	29.23	39.39
48910.50	22.38	11.34	48.02	67.28	167.24	26.64	29.23	39.40
48909.50	22.38	11.34	48.03	67.29	167.24	26.64	29.24	39.40
48908.50	22.37	11.34	48.03	67.29	167.25	26.65	29.24	39.40
48907.50	22.37	11.34	48.04	67.30	167.26	26.65	29.24	39.40
48906.50	22.37	11.33	48.04	67.30	167.26	26.65	29.24	39.41
48905.50	22.36	11.34	48.05	67.31	167.27	26.65	29.25	39.41
48904.50	22.37	11.34	48.06	67.32	167.27	26.66	29.25	39.41
48903.50	22.37	11.34	48.06	67.32	167.28	26.66	29.26	39.42
48902.50	22.36	11.34	48.07	67.33	167.28	26.67	29.26	39.43
48901.50	22.36	11.34	48.07	67.34	167.29	26.67	29.27	39.43
48900.50	22.36	11.35	48.08	67.34	167.30	26.67	29.28	39.44
48899.50	22.36	11.35	48.08	67.35	167.30	26.67	29.28	39.44
48898.50	22.36	11.35	48.09	67.35	167.30	26.68	29.29	39.45
48897.50	22.35	11.36	48.09	67.36	167.31	26.69	29.29	39.46
48896.50	22.35	11.36	48.10	67.36	167.32	26.69	29.30	39.47
48895.50	22.35	11.36	48.10	67.37	167.32	26.69	29.30	39.47
48894.50	22.35	11.36	48.10	67.37	167.32	26.69	29.31	39.48
48893.50	22.35	11.35	48.11	67.38	167.33	26.69	29.31	39.48
48892.50	22.35	11.35	48.12	67.39	167.34	26.70	29.31	39.49
48891.50	22.34	11.35	48.12	67.39	167.35	26.70	29.31	39.50
48890.50	22.34	11.35	48.13	67.40	167.35	26.71	29.32	39.50
48889.50	22.34	11.36	48.13	67.40	167.36	26.71	29.33	39.51
48888.50	22.34	11.37	48.14	67.41	167.37	26.72	29.33	39.52
48887.50	22.34	11.37	48.14	67.42	167.37	26.73	29.34	39.53
48886.50	22.34	11.37	48.15	67.43	167.38	26.73	29.35	39.54
48885.50	22.34	11.37	48.16	67.44	167.39	26.74	29.36	39.54
48884.50	22.34	11.38	48.17	67.45	167.40	26.75	29.37	39.55
48883.50	22.34	11.38	48.18	67.46	167.41	26.75	29.37	39.55
48882.50	22.34	11.38	48.19	67.47	167.42	26.75	29.37	39.56
48881.50	22.34	11.38	48.20	67.47	167.42	26.75	29.38	39.57
48880.50	22.34	11.39	48.21	67.48	167.43	26.75	29.39	39.58
48879.50	22.34	11.39	48.22	67.49	167.45	26.76	29.40	39.59
48878.50	22.34	11.40	48.23	67.50	167.45	26.76	29.41	39.59
48877.50	22.35	11.40	48.23	67.51	167.46	26.77	29.42	39.60
48876.50	22.35	11.40	48.24	67.52	167.47	26.77	29.43	39.61
48875.50	22.35	11.41	48.25	67.52	167.48	26.78	29.44	39.62
48874.50	22.35	11.41	48.26	67.53	167.48	26.79	29.45	39.63
48873.50	22.36	11.41	48.26	67.54	167.49	26.80	29.46	39.64
48872.50	22.36	11.41	48.26	67.54	167.49	26.81	29.47	39.64
48871.50	22.36	11.42	48.28	67.56	167.51	26.82	29.47	39.65
48870.50	22.36	11.43	48.28	67.57	167.52	26.82	29.48	39.66
48869.50	22.36	11.44	48.30	67.58	167.53	26.83	29.49	39.67
48868.50	22.36	11.44	48.31	67.59	167.54	26.84	29.50	39.68
48867.50	22.37	11.44	48.32	67.60	167.55	26.85	29.51	39.69
48866.50	22.37	11.45	48.33	67.62	167.57	26.86	29.51	39.70
48865.50	22.37	11.45	48.35	67.63	167.58	26.87	29.53	39.71
48864.50	22.38	11.46	48.36	67.64	167.59	26.88	29.53	39.72
48863.50	22.38	11.46	48.37	67.65	167.60	26.89	29.54	39.74
48862.50	22.39	11.47	48.38	67.67	167.61	26.90	29.56	39.75
48861.50	22.39	11.47	48.39	67.68	167.63	26.91	29.56	39.75
48860.50	22.39	11.48	48.40	67.69	167.64	26.91	29.58	39.76
48859.50	22.40	11.48	48.41	67.70	167.65	26.92	29.59	39.78
48858.50	22.40	11.49	48.42	67.71	167.67	26.93	29.60	39.79
48857.50	22.40	11.50	48.43	67.72	167.67	26.94	29.61	39.80
48856.50	22.40	11.51	48.44	67.73	167.68	26.94	29.62	39.81
48855.50	22.40	11.52	48.45	67.74	167.70	26.95	29.63	39.82
48854.50	22.40	11.52	48.46	67.75	167.71	26.96	29.64	39.83
48853.50	22.41	11.53	48.47	67.76	167.72	26.97	29.65	39.84
48852.50	22.41	11.53	48.48	67.77	167.73	26.98	29.66	39.85
48851.50	22.42	11.53	48.49	67.79	167.74	26.99	29.68	39.87
48850.50	22.42	11.53	48.51	67.80	167.76	27.00	29.69	39.88
48849.50	22.42	11.54	48.52	67.82	167.77	27.00	29.70	39.89
48848.50	22.43	11.54	48.54	67.83	167.79	27.01	29.72	39.90
48847.50	22.44	11.55	48.55	67.85	167.81	27.02	29.74	39.91
48846.50	22.44	11.56	48.57	67.86	167.82	27.02	29.75	39.92
48845.50	22.45	11.56	48.58	67.88	167.84	27.03	29.76	39.94
48844.50	22.45	11.57	48.59	67.89	167.85	27.04	29.78	39.95
48843.50	22.46	11.58	48.61	67.91	167.87	27.05	29.79	39.96
48842.50	22.46	11.58	48.62	67.93	167.88	27.06	29.81	39.97
48841.50	22.47	11.59	48.64	67.94	167.90	27.07	29.82	39.99
48840.50	22.47	11.60	48.65	67.95	167.91	27.08	29.84	40.00
48839.50	22.47	11.60	48.66	67.97	167.93	27.10	29.86	40.01
48838.50	22.48	11.61	48.68	67.98	167.94	27.11	29.87	40.03
48837.50	22.49	11.61	48.69	68.00	167.96	27.12	29.89	40.05
48836.50	22.49	11.63	48.71	68.01	167.97	27.13	29.90	40.06
48835.50	22.50	11.64	48.72	68.03	167.99	27.14	29.91	40.07
48834.50	22.51	11.64	48.74	68.04	168.01	27.16	29.93	40.08
48833.50	22.51	11.66	48.75	68.06	168.02	27.17	29.94	40.10
48832.50	22.52	11.67	48.77	68.08	168.04	27.19	29.95	40.11
48831.50	22.53	11.68	48.78	68.10	168.06	27.20	29.97	40.12
48830.50	22.54	11.70	48.80	68.11	168.08	27.21	29.98	40.14
48829.50	22.54	11.71	48.81	68.12	168.09	27.22	30.00	40.15
48828.50	22.55	11.72	48.83	68.14	168.11	27.24	30.01	40.16
48827.50	22.56	11.73	48.84	68.16	168.13	27.25	30.02	40.19
48826.50	22.56	11.73	48.85	68.17	168.14	27.27	30.03	40.21
48825.50	22.57	11.74	48.87	68.18	168.16	27.28	30.05	40.22
48824.50	22.58	11.76	48.88	68.20	168.18	27.29	30.06	40.24
48823.50	22.58	11.77	48.90	68.22	168.20	27.31	30.08	40.25
48822.50	22.59	11.77	48.92	68.24	168.21	27.32	30.09	40.27
48821.50	22.60	11.78	48.94	68.26	168.24	27.34	30.11	40.29
48820.50	22.61	11.79	48.96	68.28	168.26	27.35	30.13	40.30
48819.50	22.62	11.80	48.98	68.30	168.28	27.36	30.14	40.32
48818.50	22.63	11.81	49.00	68.32	168.30	27.37	30.16	40.33
48817.50	22.63	11.82	49.01	68.34	168.32	27.39	30.18	40.35
48816.50	22.64	11.83	49.03	68.36	168.34	27.40	30.19	40.37
48815.50	22.64	11.83	49.05	68.38	168.36	27.41	30.21	40.38
48814.50	22.65	11.84	49.07	68.40	168.38	27.43	30.23	40.40
48813.50	22.66	11.85	49.08	68.41	168.40	27.44	30.24	40.41
48812.50	22.66	11.86	49.09	68.42	168.41	27.45	30.25	40.43
48811.50	22.67	11.87	49.11	68.44	168.43	27.47	30.27	40.45
48810.50	22.68	11.88	49.13	68.46	168.45	27.48	30.28	40.47
48809.50	22.68	11.90	49.14	68.48	168.47	27.49	30.30	40.49
48808.50	22.69	11.91	49.16	68.49	168.49	27.50	30.32	40.50
48807.50	22.70	11.91	49.18	68.51	168.51	27.51	30.33	40.52
48806.50	22.71	11.92	49.20	68.54	168.53	27.52	30.35	40.54
48805.50	22.73	11.94	49.22	68.55	168.55	27.53	30.37	40.56
48804.50	22.74	11.95	49.23	68.57	168.57	27.55	30.39	40.57
48803.50	22.74	11.97	49.26	68.60	168.59	27.56	30.41	40.59
48802.50	22.75	11.99	49.27	68.62	168.62	27.57	30.43	40.61
48801.50	22.76	12.00	49.29	68.64	168.64	27.59	30.44	40.63
48800.50	22.78	12.02	49.31	68.66	168.66	27.60	30.46	40.64
48799.50	22.79	12.03	49.34	68.68	168.68	27.62	30.48	40.66
48798.50	22.80	12.05	49.36	68.70	168.71	27.63	30.50	40.68
48797.50	22.81	12.06	49.38	68.72	168.73	27.65	30.52	40.70
48796.50	22.82	12.07	49.40	68.74	168.75	27.67	30.53	40.72
48795.50	22.84	12.08	49.42	68.77	168.77	27.69	30.55	40.74
48794.50	22.85	12.09	49.44	68.79	168.80	27.71	30.57	40.76
48793.50	22.86	12.10	49.46	68.81	168.82	27.72	30.58	40.78
48792.50	22.87	12.11	49.48	68.83	168.84	27.74	30.60	40.79
48791.50	22.88	12.13	49.50	68.85	168.86	27.76	30.62	40.81
48790.50	22.89	12.14	49.52	68.87	168.88	27.77	30.64	40.83
48789.50	22.90	12.15	49.54	68.90	168.91	27.79	30.66	40.85
48788.50	22.91	12.17	49.56	68.92	168.93	27.81	30.68	40.87
48787.50	22.92	12.18	49.58	68.94	168.96	27.83	30.70	40.89
48786.50	22.93	12.19	49.60	68.96	168.98	27.85	30.71	40.91
48785.50	22.94	12.20	49.62	68.98	169.01	27.86	30.73	40.93
48784.50	22.94	12.21	49.65	69.01	169.03	27.88	30.75	40.95
48783.50	22.95	12.22	49.67	69.03	169.05	27.90	30.77	40.97
48782.50	22.96	12.23	49.69	69.05	169.08	27.92	30.79	40.99
48781.50	22.97	12.25	49.71	69.08	169.11	27.93	30.81	41.01
48780.50	22.98	12.25	49.74	69.10	169.13	27.95	30.84	41.03
48779.50	23.00	12.27	49.75	69.12	169.15	27.96	30.86	41.05
48778.50	23.01	12.28	49.77	69.14	169.18	27.98	30.89	41.07
48777.50	23.02	12.30	49.80	69.17	169.21	28.00	30.91	41.09
48776.50	23.03	12.32	49.82	69.19	169.23	28.01	30.94	41.11
48775.50	23.04	12.34	49.84	69.21	169.26	28.03	30.96	41.13
48774.50	23.06	12.35	49.86	69.24	169.28	28.05	30.98	41.15
48773.50	23.07	12.37	49.89	69.26	169.31	28.08	31.00	41.17
48772.50	23.08	12.39	49.91	69.29	169.34	28.10	31.02	41.19
48771.50	23.09	12.40	49.93	69.31	169.36	28.12	31.04	41.22
48770.50	23.10	12.42	49.95	69.33	169.38	28.14	31.06	41.24
48769.50	23.11	12.43	49.97	69.36	169.41	28.16	31.08	41.26
48768.50	23.12	12.44	50.00	69.38	169.44	28.18	31.10	41.28
48767.50	23.13	12.46	50.03	69.41	169.47	28.20	31.12	41.31
48766.50	23.15	12.47	50.05	69.44	169.49	28.22	31.14	41.33
48765.50	23.16	12.48	50.08	69.46	169.52	28.23	31.17	41.36
48764.50	23.18	12.50	50.10	69.49	169.55	28.25	31.19	41.38
48763.50	23.19	12.51	50.13	69.52	169.58	28.26	31.21	41.40
48762.50	23.20	12.52	50.15	69.54	169.60	28.28	31.24	41.42
48761.50	23.21	12.54	50.18	69.57	169.63	28.31	31.26	41.44
48760.50	23.22	12.55	50.20	69.60	169.66	28.33	31.28	41.47
48759.50	23.23	12.57	50.23	69.62	169.69	28.35	31.31	41.49
48758.50	23.25	12.59	50.25	69.65	169.71	28.37	31.33	41.51
48757.50	23.26	12.61	50.28	69.67	169.74	28.38	31.36	41.53
48756.50	23.28	12.62	50.30	69.70	169.77	28.40	31.38	41.56
48755.50	23.29	12.64	50.33	69.72	169.80	28.41	31.40	41.58
48754.50	23.30	12.65	50.35	69.75	169.83	28.43	31.43	41.61
48753.50	23.32	12.68	50.38	69.78	169.85	28.45	31.45	41.63
48752.50	23.33	12.70	50.40	69.80	169.88	28.47	31.48	41.65
48751.50	23.34	12.71	50.43	69.83	169.91	28.48	31.51	41.68
48750.50	23.36	12.72	50.45	69.86	169.94	28.50	31.53	41.70
48749.50	23.37	12.74	50.47	69.88	169.96	28.53	31.56	41.72
48748.50	23.38	12.75	50.50	69.91	169.99	28.55	31.58	41.75
48747.50	23.40	12.77	50.53	69.93	170.02	28.57	31.60	41.78
48746.50	23.41	12.78	50.55	69.96	170.05	28.60	31.62	41.80
48745.50	23.43	12.79	50.57	69.98	170.08	28.62	31.65	41.83
48744.50	23.44	12.81	50.60	70.01	170.11	28.64	31.67	41.85
48743.50	23.45	12.83	50.62	70.04	170.14	28.66	31.70	41.88
48742.50	23.47	12.84	50.64	70.06	170.16	28.69	31.72	41.91
48741.50	23.49	12.85	50.67	70.09	170.19	28.71	31.75	41.93
48740.50	23.50	12.86	50.70	70.12	170.22	28.73	31.77	41.95
48739.50	23.51	12.88	50.72	70.14	170.25	28.75	31.80	41.98
48738.50	23.53	12.90	50.75	70.17	170.29	28.77	31.82	42.00
48737.50	23.54	12.91	50.78	70.21	170.32	28.79	31.84	42.03
48736.50	23.55	12.93	50.81	70.24	170.35	28.81	31.86	42.06
48735.50	23.57	12.95	50.84	70.27	170.38	28.84	31.88	42.08
48734.50	23.59	12.97	50.87	70.30	170.42	28.86	31.90	42.11
48733.50	23.60	12.99	50.90	70.33	170.45	28.87	31.92	42.13
48732.50	23.62	13.01	50.93	70.36	170.48	28.89	31.95	42.16
48731.50	23.63	13.03	50.96	70.39	170.51	28.91	31.98	42.18
48730.50	23.65	13.05	50.98	70.41	170.54	28.93	32.00	42.21
48729.50	23.67	13.07	51.01	70.44	170.57	28.96	32.03	42.23
48728.50	23.69	13.10	51.04	70.47	170.60	28.98	32.06	42.26
48727.50	23.70	13.12	51.06	70.50	170.63	29.01	32.08	42.28
48726.50	23.72	13.13	51.09	70.52	170.66	29.04	32.11	42.31
48725.50	23.73	13.15	51.11	70.55	170.69	29.06	32.13	42.33
48724.50	23.75	13.17	51.14	70.58	170.72	29.09	32.16	42.36
48723.50	23.76	13.19	51.16	70.61	170.75	29.11	32.19	42.39
48722.50	23.78	13.21	51.19	70.63	170.78	29.12	32.21	42.41
48721.50	23.79	13.23	51.22	70.66	170.81	29.14	32.24	42.44
48720.50	23.81	13.24	51.24	70.69	170.84	29.16	32.26	42.46
48719.50	23.83	13.26	51.27	70.72	170.87	29.19	32.29	42.49
48718.50	23.84	13.28	51.30	70.75	170.90	29.22	32.31	42.52
48717.50	23.86	13.30	51.33	70.78	170.94	29.24	32.33	42.54
48716.50	23.87	13.32	51.36	70.81	170.97	29.27	32.37	42.57
48715.50	23.89	13.34	51.39	70.85	171.01	29.29	32.40	42.59
48714.50	23.90	13.36	51.42	70.88	171.04	29.31	32.43	42.62
48713.50	23.92	13.38	51.45	70.91	171.07	29.33	32.46	42.65
48712.50	23.93	13.40	51.48	70.94	171.11	29.35	32.49	42.67
48711.50	23.95	13.42	51.51	70.97	171.14	29.37	32.52	42.70
48710.50	23.96	13.44	51.54	71.00	171.17	29.39	32.55	42.72
48709.50	23.98	13.46	51.57	71.04	171.21	29.42	32.58	42.75
48708.50	24.00	13.48	51.60	71.07	171.24	29.44	32.61	42.77
48707.50	24.01	13.50	51.63	71.09	171.27	29.47	32.63	42.80
48706.50	24.03	13.52	51.65	71.12	171.30	29.50	32.66	42.82
48705.50	24.05	13.54	51.68	71.15	171.34	29.52	32.68	42.85
48704.50	24.07	13.56	51.71	71.18	171.37	29.55	32.71	42.88
48703.50	24.09	13.58	51.74	71.21	171.40	29.58	32.74	42.91
48702.50	24.11	13.60	51.76	71.24	171.43	29.60	32.76	42.94
48701.50	24.13	13.61	51.79	71.27	171.46	29.63	32.79	42.97
48700.50	24.14	13.64	51.82	71.30	171.50	29.65	32.81	42.99
48699.50	24.16	13.66	51.85	71.33	171.53	29.67	32.83	43.02
48698.50	24.18	13.68	51.88	71.36	171.56	29.70	32.86	43.05
48697.50	24.19	13.70	51.91	71.39	171.60	29.72	32.89	43.08
48696.50	24.21	13.71	51.94	71.43	171.63	29.74	32.91	43.10
48695.50	24.23	13.73	51.97	71.46	171.67	29.76	32.95	43.13
48694.50	24.25	13.75	52.00	71.49	171.70	29.78	32.97	43.16
48693.50	24.27	13.77	52.04	71.52	171.74	29.80	33.01	43.18
48692.50	24.28	13.79	52.07	71.56	171.78	29.83	33.03	43.21
48691.50	24.30	13.81	52.10	71.59	171.81	29.85	33.06	43.24
48690.50	24.32	13.83	52.13	71.62	171.84	29.88	33.09	43.27
48689.50	24.33	13.85	52.16	71.65	171.88	29.90	33.11	43.30
48688.50	24.35	13.87	52.19	71.69	171.91	29.92	33.14	43.33
48687.50	24.36	13.90	52.22	71.72	171.95	29.95	33.18	43.35
48686.50	24.38	13.92	52.25	71.75	171.98	29.97	33.21	43.38
48685.50	24.39	13.94	52.29	71.78	172.02	29.99	33.25	43.41
48684.50	24.41	13.96	52.31	71.81	172.05	30.01	33.28	43.43
48683.50	24.43	13.98	52.34	71.84	172.08	30.03	33.32	43.46
48682.50	24.45	14.00	52.37	71.87	172.12	30.06	33.35	43.48
48681.50	24.47	14.02	52.40	71.90	172.15	30.08	33.39	43.51
48680.50	24.49	14.04	52.43	71.94	172.18	30.10	33.42	43.54
48679.50	24.51	14.06	52.46	71.97	172.22	30.13	33.46	43.57
48678.50	24.53	14.08	52.49	72.00	172.25	30.15	33.49	43.60
48677.50	24.55	14.10	52.52	72.03	172.29	30.17	33.52	43.63
48676.50	24.57	14.12	52.55	72.07	172.32	30.20	33.55	43.66
48675.50	24.59	14.14	52.59	72.10	172.36	30.22	33.57	43.69
48674.50	24.60	14.16	52.62	72.13	172.40	30.24	33.60	43.72
48673.50	24.62	14.18	52.65	72.17	172.43	30.27	33.64	43.75
48672.50	24.64	14.20	52.68	72.20	172.47	30.30	33.68	43.78
48671.50	24.65	14.22	52.71	72.23	172.50	30.33	33.71	43.81
48670.50	24.67	14.25	52.75	72.27	172.54	30.36	33.74	43.84
48669.50	24.69	14.27	52.78	72.30	172.58	30.38	33.77	43.87
48668.50	24.71	14.29	52.80	72.33	172.61	30.41	33.80	43.90
48667.50	24.72	14.31	52.84	72.36	172.65	30.43	33.82	43.93
48666.50	24.74	14.33	52.87	72.40	172.68	30.46	33.85	43.96
48665.50	24.76	14.35	52.90	72.43	172.72	30.48	33.88	43.99
48664.50	24.78	14.36	52.93	72.46	172.75	30.51	33.91	44.01
48663.50	24.80	14.38	52.96	72.49	172.79	30.53	33.93	44.05
48662.50	24.81	14.41	52.99	72.52	172.82	30.56	33.95	44.08
48661.50	24.83	14.43	53.02	72.55	172.85	30.59	33.98	44.11
48660.50	24.85	14.45	53.05	72.59	172.89	30.62	34.01	44.13
48659.50	24.87	14.47	53.08	72.62	172.93	30.64	34.03	44.16
48658.50	24.88	14.49	53.11	72.65	172.96	30.67	34.06	44.19
48657.50	24.90	14.51	53.15	72.69	173.00	30.70	34.09	44.22
48656.50	24.92	14.53	53.18	72.73	173.04	30.73	34.12	44.25
48655.50	24.94	14.55	53.22	72.76	173.08	30.75	34.15	44.28
48654.50	24.96	14.57	53.25	72.80	173.12	30.78	34.18	44.31
48653.50	24.98	14.60	53.29	72.84	173.16	30.81	34.20	44.34
48652.50	24.99	14.62	53.32	72.87	173.20	30.83	34.23	44.37
48651.50	25.01	14.64	53.35	72.90	173.24	30.86	34.26	44.40
48650.50	25.03	14.67	53.38	72.94	173.28	30.89	34.30	44.43
48649.50	25.05	14.68	53.42	72.97	173.31	30.92	34.34	44.46
48648.50	25.07	14.70	53.45	73.00	173.35	30.95	34.37	44.49
48647.50	25.09	14.72	53.48	73.04	173.38	30.97	34.41	44.52
48646.50	25.11	14.74	53.51	73.07	173.42	30.99	34.44	44.55
48645.50	25.13	14.76	53.54	73.10	173.46	31.01	34.48	44.58
48644.50	25.15	14.78	53.57	73.13	173.49	31.03	34.51	44.61
48643.50	25.17	14.81	53.59	73.16	173.52	31.06	34.55	44.64
48642.50	25.19	14.83	53.63	73.20	173.56	31.08	34.58	44.67
48641.50	25.21	14.85	53.66	73.23	173.60	31.11	34.61	44.71
48640.50	25.23	14.87	53.69	73.26	173.64	31.12	34.64	44.74
48639.50	25.24	14.89	53.72	73.30	173.67	31.15	34.67	44.77
48638.50	25.26	14.91	53.76	73.33	173.71	31.17	34.70	44.79
48637.50	25.28	14.93	53.79	73.37	173.75	31.19	34.73	44.82
48636.50	25.30	14.95	53.82	73.40	173.79	31.22	34.76	44.86
48635.50	25.32	14.97	53.86	73.44	173.82	31.25	34.79	44.89
48634.50	25.33	14.99	53.89	73.47	173.87	31.27	34.83	44.92
48633.50	25.36	15.01	53.92	73.51	173.90	31.30	34.87	44.95
48632.50	25.37	15.03	53.96	73.54	173.94	31.33	34.90	44.97
48631.50	25.39	15.05	53.99	73.58	173.98	31.36	34.93	45.00
48630.50	25.41	15.07	54.03	73.62	174.02	31.38	34.96	45.03
48629.50	25.43	15.09	54.06	73.65	174.06	31.41	34.99	45.07
48628.50	25.45	15.12	54.10	73.69	174.10	31.44	35.02	45.10
48627.50	25.47	15.15	54.13	73.72	174.13	31.46	35.05	45.13
48626.50	25.49	15.17	54.16	73.76	174.17	31.49	35.08	45.16
48625.50	25.51	15.19	54.19	73.79	174.21	31.51	35.10	45.19
48624.50	25.53	15.22	54.23	73.83	174.25	31.54	35.13	45.22
48623.50	25.54	15.24	54.25	73.86	174.28	31.57	35.16	45.25
48622.50	25.56	15.27	54.28	73.89	174.31	31.60	35.18	45.28
48621.50	25.58	15.29	54.32	73.92	174.36	31.63	35.21	45.31
48620.50	25.60	15.31	54.35	73.96	174.40	31.65	35.24	45.34
48619.50	25.62	15.33	54.38	73.99	174.43	31.68	35.27	45.37
48618.50	25.64	15.35	54.41	74.02	174.47	31.70	35.29	45.40
48617.50	25.66	15.38	54.45	74.06	174.51	31.73	35.33	45.43
48616.50	25.67	15.40	54.48	74.09	174.55	31.76	35.36	45.47
48615.50	25.69	15.42	54.51	74.13	174.58	31.79	35.39	45.50
48614.50	25.71	15.43	54.54	74.16	174.62	31.81	35.42	45.53
48613.50	25.73	15.46	54.58	74.20	174.66	31.84	35.45	45.56
48612.50	25.75	15.48	54.61	74.23	174.70	31.87	35.48	45.59
48611.50	25.77	15.50	54.64	74.26	174.73	31.89	35.52	45.62
48610.50	25.79	15.53	54.68	74.30	174.77	31.92	35.54	45.66
48609.50	25.81	15.55	54.71	74.34	174.82	31.94	35.57	45.69
48608.50	25.83	15.57	54.75	74.38	174.86	31.96	35.60	45.71
48607.50	25.85	15.59	54.78	74.41	174.90	31.98	35.64	45.74
48606.50	25.87	15.61	54.82	74.45	174.94	32.01	35.67	45.77
48605.50	25.89	15.64	54.85	74.49	174.97	32.03	35.70	45.80
48604.50	25.91	15.66	54.89	74.52	175.02	32.06	35.73	45.83
48603.50	25.92	15.69	54.92	74.56	175.06	32.09	35.76	45.86
48602.50	25.94	15.71	54.95	74.59	175.09	32.11	35.80	45.89
48601.50	25.96	15.73	54.98	74.62	175.13	32.14	35.83	45.92
48600.50	25.98	15.75	55.01	74.66	175.17	32.16	35.86	45.95
48599.50	26.00	15.77	55.05	74.69	175.21	32.18	35.90	45.98
48598.50	26.02	15.80	55.08	74.72	175.24	32.21	35.93	46.01
48597.50	26.03	15.82	55.11	74.75	175.28	32.24	35.96	46.04
48596.50	26.05	15.84	55.14	74.79	175.32	32.27	35.99	46.08
48595.50	26.08	15.87	55.18	74.83	175.36	32.30	36.02	46.11
48594.50	26.10	15.88	55.21	74.86	175.39	32.33	36.05	46.14
48593.50	26.12	15.90	55.24	74.89	175.43	32.35	36.09	46.17
48592.50	26.13	15.92	55.28	74.93	175.47	32.38	36.12	46.20
48591.50	26.15	15.94	55.31	74.97	175.51	32.41	36.16	46.23
48590.50	26.18	15.96	55.34	75.00	175.55	32.43	36.19	46.26
48589.50	26.20	15.98	55.38	75.04	175.59	32.46	36.22	46.29
48588.50	26.22	16.01	55.42	75.08	175.63	32.49	36.25	46.32
48587.50	26.24	16.03	55.45	75.12	175.67	32.52	36.27	46.35
48586.50	26.25	16.06	55.49	75.16	175.71	32.55	36.30	46.38
48585.50	26.27	16.08	55.52	75.19	175.75	32.57	36.33	46.41
48584.50	26.30	16.10	55.56	75.23	175.79	32.60	36.37	46.44
48583.50	26.32	16.13	55.59	75.26	175.83	32.63	36.41	46.47
48582.50	26.34	16.15	55.63	75.30	175.87	32.66	36.44	46.51
48581.50	26.35	16.18	55.66	75.33	175.91	32.68	36.48	46.54
48580.50	26.37	16.20	55.68	75.36	175.95	32.71	36.50	46.57
48579.50	26.39	16.22	55.71	75.39	175.98	32.73	36.53	46.60
48578.50	26.41	16.24	55.75	75.43	176.02	32.76	36.55	46.63
48577.50	26.43	16.26	55.78	75.46	176.06	32.79	36.58	46.66
48576.50	26.45	16.28	55.81	75.49	176.09	32.82	36.60	46.69
48575.50	26.47	16.30	55.84	75.53	176.13	32.84	36.63	46.72
48574.50	26.49	16.32	55.88	75.57	176.17	32.86	36.66	46.76
48573.50	26.51	16.34	55.91	75.60	176.21	32.88	36.69	46.79
48572.50	26.53	16.36	55.95	75.64	176.25	32.91	36.73	46.81
48571.50	26.55	16.38	55.98	75.68	176.29	32.93	36.76	46.85
48570.50	26.57	16.40	56.02	75.72	176.33	32.96	36.80	46.88
48569.50	26.59	16.42	56.06	75.75	176.37	32.99	36.82	46.91
48568.50	26.61	16.44	56.09	75.79	176.41	33.02	36.85	46.94
48567.50	26.63	16.46	56.13	75.82	176.45	33.05	36.88	46.97
48566.50	26.65	16.48	56.16	75.86	176.49	33.07	36.91	47.00
48565.50	26.67	16.50	56.19	75.90	176.53	33.10	36.94	47.03
48564.50	26.68	16.53	56.23	75.93	176.57	33.12	36.98	47.06
48563.50	26.70	16.55	56.26	75.97	176.61	33.14	37.01	47.09
48562.50	26.72	16.58	56.29	76.00	176.65	33.17	37.04	47.12
48561.50	26.74	16.59	56.33	76.04	176.69	33.19	37.07	47.16
48560.50	26.76	16.62	56.36	76.07	176.72	33.21	37.10	47.19
48559.50	26.79	16.64	56.39	76.11	176.76	33.24	37.13	47.22
48558.50	26.80	16.66	56.42	76.14	176.80	33.27	37.16	47.25
48557.50	26.82	16.69	56.46	76.18	176.84	33.30	37.19	47.28
48556.50	26.84	16.71	56.49	76.21	176.89	33.33	37.22	47.31
48555.50	26.86	16.73	56.52	76.25	176.92	33.36	37.25	47.34
48554.50	26.88	16.75	56.56	76.28	176.96	33.38	37.28	47.37
48553.50	26.90	16.77	56.60	76.32	177.00	33.41	37.30	47.40
48552.50	26.92	16.79	56.63	76.35	177.04	33.43	37.33	47.43
48551.50	26.94	16.82	56.66	76.39	177.08	33.46	37.36	47.46
48550.50	26.96	16.84	56.70	76.43	177.12	33.49	37.40	47.49
48549.50	26.98	16.86	56.73	76.47	177.17	33.52	37.43	47.52
48548.50	27.00	16.89	56.77	76.50	177.20	33.54	37.46	47.55
48547.50	27.02	16.91	56.80	76.54	177.24	33.57	37.49	47.58
48546.50	27.03	16.93	56.84	76.57	177.29	33.59	37.52	47.61
48545.50	27.05	16.96	56.87	76.61	177.32	33.61	37.56	47.64
48544.50	27.07	16.98	56.90	76.64	177.36	33.63	37.59	47.67
48543.50	27.09	17.00	56.93	76.68	177.40	33.66	37.63	47.70
48542.50	27.11	17.02	56.97	76.71	177.44	33.68	37.66	47.73
48541.50	27.13	17.04	57.00	76.75	177.48	33.70	37.70	47.76
48540.50	27.15	17.07	57.03	76.78	177.52	33.72	37.73	47.79
48539.50	27.17	17.09	57.06	76.82	177.56	33.75	37.76	47.82
48538.50	27.18	17.11	57.10	76.85	177.60	33.78	37.79	47.85
48537.50	27.20	17.14	57.13	76.89	177.64	33.80	37.83	47.88
48536.50	27.22	17.16	57.16	76.92	177.68	33.82	37.86	47.91
48535.50	27.24	17.19	57.19	76.95	177.71	33.84	37.89	47.94
48534.50	27.26	17.21	57.23	76.99	177.76	33.87	37.93	47.97
48533.50	27.28	17.23	57.26	77.03	177.80	33.89	37.96	48.00
48532.50	27.30	17.25	57.30	77.06	177.84	33.92	37.99	48.03
48531.50	27.32	17.26	57.34	77.10	177.88	33.96	38.02	48.06
48530.50	27.34	17.28	57.37	77.14	177.92	33.98	38.04	48.09
48529.50	27.36	17.30	57.41	77.18	177.96	34.00	38.08	48.12
48528.50	27.37	17.32	57.44	77.22	178.00	34.03	38.11	48.15
48527.50	27.38	17.34	57.47	77.25	178.04	34.06	38.13	48.18
48526.50	27.40	17.36	57.51	77.29	178.08	34.09	38.15	48.21
48525.50	27.42	17.38	57.55	77.32	178.12	34.11	38.18	48.24
48524.50	27.44	17.41	57.58	77.36	178.16	34.13	38.21	48.27
48523.50	27.45	17.43	57.61	77.39	178.20	34.15	38.24	48.30
48522.50	27.47	17.46	57.63	77.42	178.23	34.18	38.27	48.33
48521.50	27.49	17.49	57.67	77.45	178.27	34.20	38.30	48.36
48520.50	27.50	17.51	57.70	77.49	178.31	34.23	38.33	48.39
48519.50	27.52	17.53	57.73	77.52	178.34	34.25	38.36	48.42
48518.50	27.54	17.55	57.76	77.55	178.38	34.28	38.39	48.45
48517.50	27.56	17.57	57.79	77.58	178.42	34.31	38.42	48.48
48516.50	27.58	17.59	57.82	77.62	178.46	34.33	38.45	48.51
48515.50	27.60	17.60	57.86	77.65	178.50	34.36	38.48	48.54
48514.50	27.62	17.62	57.89	77.69	178.53	34.39	38.51	48.57
48513.50	27.63	17.64	57.92	77.72	178.57	34.41	38.54	48.60
48512.50	27.65	17.66	57.95	77.76	178.61	34.43	38.57	48.63
48511.50	27.66	17.68	57.99	77.79	178.65	34.45	38.60	48.66
48510.50	27.68	17.70	58.02	77.83	178.69	34.48	38.64	48.69
48509.50	27.70	17.72	58.06	77.86	178.73	34.50	38.67	48.71
48508.50	27.72	17.74	58.09	77.90	178.77	34.52	38.71	48.74
48507.50	27.74	17.77	58.12	77.94	178.81	34.54	38.74	48.77
48506.50	27.76	17.79	58.16	77.97	178.85	34.57	38.77	48.81
48505.50	27.78	17.81	58.19	78.00	178.89	34.59	38.79	48.84
48504.50	27.80	17.83	58.22	78.04	178.93	34.61	38.82	48.87
48503.50	27.81	17.85	58.25	78.07	178.97	34.64	38.85	48.89
48502.50	27.83	17.87	58.28	78.10	179.00	34.66	38.88	48.92
48501.50	27.84	17.89	58.31	78.13	179.03	34.68	38.90	48.95
48500.50	27.86	17.91	58.34	78.17	179.07	34.70	38.92	48.98
48499.50	27.88	17.93	58.37	78.20	179.11	34.73	38.95	49.01
48498.50	27.90	17.95	58.40	78.23	179.14	34.75	38.98	49.04
48497.50	27.91	17.97	58.43	78.26	179.17	34.77	39.00	49.06
48496.50	27.93	17.99	58.46	78.29	179.21	34.79	39.02	49.10
48495.50	27.95	18.01	58.49	78.33	179.25	34.82	39.05	49.13
48494.50	27.97	18.03	58.53	78.36	179.29	34.84	39.09	49.16
48493.50	27.99	18.04	58.56	78.40	179.33	34.87	39.12	49.18
48492.50	28.01	18.07	58.59	78.43	179.37	34.89	39.15	49.21
48491.50	28.02	18.09	58.63	78.47	179.40	34.91	39.18	49.23
48490.50	28.03	18.10	58.66	78.50	179.44	34.93	39.20	49.26
48489.50	28.05	18.12	58.69	78.53	179.48	34.95	39.23	49.28
48488.50	28.07	18.14	58.72	78.57	179.52	34.98	39.25	49.32
48487.50	28.08	18.17	58.75	78.60	179.55	34.99	39.28	49.35
48486.50	28.10	18.19	58.78	78.63	179.59	35.01	39.31	49.38
48485.50	28.11	18.21	58.82	78.67	179.63	35.03	39.34	49.40
48484.50	28.13	18.23	58.85	78.70	179.67	35.05	39.37	49.43
48483.50	28.15	18.24	58.88	78.73	179.70	35.08	39.41	49.46
48482.50	28.17	18.26	58.91	78.76	179.74	35.10	39.43	49.49
48481.50	28.18	18.28	58.93	78.79	179.77	35.13	39.46	49.52
48480.50	28.20	18.30	58.97	78.82	179.81	35.15	39.48	49.54
48479.50	28.22	18.32	59.00	78.86	179.85	35.17	39.51	49.57
48478.50	28.24	18.34	59.02	78.89	179.88	35.20	39.54	49.60
48477.50	28.25	18.36	59.05	78.91	179.91	35.22	39.57	49.63
48476.50	28.27	18.37	59.08	78.95	179.95	35.24	39.60	49.65
48475.50	28.28	18.39	59.11	78.98	179.99	35.27	39.63	49.68
48474.50	28.30	18.41	59.14	79.01	180.02	35.29	39.65	49.71
48473.50	28.31	18.43	59.17	79.04	180.05	35.31	39.67	49.73
48472.50	28.33	18.45	59.20	79.07	180.09	35.33	39.70	49.76
48471.50	28.34	18.47	59.23	79.11	180.13	35.36	39.73	49.79
48470.50	28.36	18.49	59.26	79.14	180.16	35.38	39.76	49.81
48469.50	28.37	18.50	59.30	79.17	180.20	35.41	39.79	49.84
48468.50	28.39	18.52	59.33	79.21	180.24	35.43	39.82	49.86
48467.50	28.40	18.54	59.36	79.24	180.28	35.45	39.85	49.89
48466.50	28.42	18.55	59.39	79.28	180.32	35.47	39.87	49.92
48465.50	28.43	18.58	59.42	79.31	180.35	35.49	39.90	49.95
48464.50	28.45	18.59	59.45	79.34	180.39	35.51	39.92	49.97
48463.50	28.46	18.61	59.49	79.38	180.42	35.53	39.95	50.00
48462.50	28.48	18.63	59.52	79.41	180.46	35.55	39.98	50.02
48461.50	28.49	18.65	59.55	79.44	180.49	35.57	40.00	50.04
48460.50	28.50	18.67	59.57	79.47	180.53	35.59	40.04	50.07
48459.50	28.52	18.68	59.60	79.50	180.56	35.61	40.07	50.10
48458.50	28.53	18.70	59.63	79.53	180.59	35.62	40.09	50.12
48457.50	28.55	18.71	59.66	79.55	180.63	35.64	40.11	50.15
48456.50	28.56	18.73	59.69	79.59	180.66	35.66	40.14	50.17
48455.50	28.58	18.75	59.72	79.62	180.70	35.68	40.17	50.20
48454.50	28.59	18.77	59.75	79.65	180.73	35.70	40.20	50.22
48453.50	28.61	18.78	59.78	79.68	180.77	35.72	40.23	50.25
48452.50	28.63	18.80	59.81	79.71	180.80	35.73	40.25	50.27
48451.50	28.64	18.82	59.84	79.74	180.84	35.75	40.28	50.29
48450.50	28.66	18.84	59.86	79.77	180.87	35.77	40.30	50.32
48449.50	28.67	18.85	59.89	79.80	180.91	35.78	40.32	50.34
48448.50	28.69	18.86	59.92	79.83	180.94	35.80	40.35	50.37
48447.50	28.70	18.88	59.95	79.87	180.98	35.82	40.37	50.39
48446.50	28.71	18.90	59.98	79.89	181.01	35.85	40.39	50.42
48445.50	28.72	18.92	60.00	79.92	181.04	35.87	40.42	50.44
48444.50	28.74	18.93	60.03	79.95	181.07	35.89	40.44	50.47
48443.50	28.75	18.95	60.05	79.98	181.11	35.92	40.47	50.49
48442.50	28.77	18.97	60.08	80.01	181.14	35.93	40.49	50.52
48441.50	28.78	18.98	60.10	80.03	181.17	35.95	40.51	50.54
48440.50	28.80	18.99	60.13	80.06	181.20	35.97	40.53	50.56
48439.50	28.81	19.00	60.16	80.09	181.24	35.99	40.56	50.58
48438.50	28.83	19.02	60.19	80.12	181.27	36.01	40.59	50.61
48437.50	28.84	19.04	60.21	80.15	181.31	36.03	40.62	50.64
48436.50	28.86	19.06	60.24	80.18	181.34	36.05	40.64	50.66
48435.50	28.87	19.07	60.27	80.21	181.38	36.07	40.66	50.68
48434.50	28.88	19.09	60.30	80.24	181.42	36.09	40.69	50.70
48433.50	28.90	19.10	60.33	80.27	181.45	36.11	40.72	50.73
48432.50	28.91	19.12	60.36	80.30	181.48	36.13	40.74	50.75
48431.50	28.92	19.13	60.39	80.33	181.52	36.14	40.77	50.78
48430.50	28.94	19.14	60.42	80.36	181.55	36.15	40.79	50.80
48429.50	28.95	19.16	60.44	80.39	181.58	36.17	40.82	50.82
48428.50	28.96	19.17	60.47	80.42	181.61	36.19	40.84	50.84
48427.50	28.98	19.19	60.50	80.45	181.65	36.20	40.86	50.86
48426.50	28.99	19.20	60.52	80.48	181.68	36.22	40.89	50.89
48425.50	29.00	19.22	60.55	80.50	181.71	36.23	40.91	50.91
48424.50	29.02	19.23	60.57	80.53	181.74	36.25	40.93	50.93
48423.50	29.03	19.25	60.60	80.55	181.77	36.27	40.96	50.95
48422.50	29.04	19.27	60.62	80.58	181.80	36.28	40.98	50.97
48421.50	29.05	19.28	60.64	80.60	181.83	36.30	41.00	50.99
48420.50	29.06	19.30	60.67	80.63	181.86	36.33	41.02	51.01
48419.50	29.08	19.31	60.69	80.66	181.89	36.35	41.05	51.03
48418.50	29.09	19.33	60.72	80.69	181.92	36.37	41.07	51.05
48417.50	29.10	19.35	60.75	80.71	181.95	36.39	41.09	51.07
48416.50	29.11	19.36	60.77	80.74	181.99	36.40	41.12	51.09
48415.50	29.12	19.38	60.80	80.77	182.02	36.41	41.13	51.11
48414.50	29.13	19.39	60.83	80.80	182.05	36.43	41.15	51.13
48413.50	29.14	19.40	60.86	80.83	182.09	36.45	41.17	51.16
48412.50	29.15	19.41	60.88	80.86	182.12	36.47	41.18	51.18
48411.50	29.16	19.42	60.91	80.89	182.15	36.49	41.21	51.20
48410.50	29.17	19.43	60.94	80.92	182.18	36.51	41.23	51.22
48409.50	29.18	19.45	60.96	80.94	182.21	36.53	41.25	51.25
48408.50	29.19	19.46	60.99	80.97	182.24	36.55	41.27	51.27
48407.50	29.20	19.47	61.01	80.99	182.27	36.56	41.29	51.29
48406.50	29.21	19.49	61.04	81.02	182.30	36.58	41.31	51.31
48405.50	29.22	19.50	61.06	81.04	182.33	36.59	41.33	51.33
48404.50	29.23	19.52	61.08	81.07	182.36	36.60	41.34	51.35
48403.50	29.24	19.53	61.10	81.09	182.39	36.62	41.37	51.37
48402.50	29.25	19.54	61.13	81.12	182.42	36.64	41.40	51.39
48401.50	29.26	19.55	61.15	81.14	182.44	36.66	41.42	51.41
48400.50	29.28	19.56	61.17	81.16	182.47	36.67	41.44	51.43
48399.50	29.29	19.57	61.20	81.19	182.50	36.68	41.45	51.45
48398.50	29.29	19.59	61.22	81.22	182.53	36.70	41.48	51.47
48397.50	29.30	19.60	61.24	81.24	182.56	36.72	41.50	51.49
48396.50	29.31	19.61	61.26	81.26	182.59	36.73	41.52	51.51
48395.50	29.33	19.62	61.29	81.29	182.62	36.74	41.55	51.53
48394.50	29.34	19.63	61.31	81.32	182.65	36.76	41.57	51.55
48393.50	29.35	19.65	61.33	81.34	182.68	36.77	41.59	51.57
48392.50	29.36	19.66	61.36	81.36	182.71	36.78	41.61	51.59
48391.50	29.37	19.67	61.38	81.39	182.74	36.79	41.63	51.61
48390.50	29.38	19.68	61.41	81.42	182.77	36.81	41.65	51.63
48389.50	29.39	19.70	61.43	81.45	182.80	36.82	41.67	51.64
48388.50	29.39	19.71	61.46	81.47	182.83	36.82	41.69	51.67
48387.50	29.40	19.73	61.48	81.50	182.85	36.84	41.71	51.69
48386.50	29.41	19.75	61.51	81.52	182.88	36.85	41.73	51.71
48385.50	29.42	19.76	61.53	81.54	182.91	36.87	41.75	51.73
48384.50	29.43	19.77	61.55	81.57	182.94	36.88	41.77	51.74
48383.50	29.44	19.78	61.58	81.59	182.97	36.90	41.79	51.76
48382.50	29.45	19.79	61.60	81.62	182.99	36.91	41.81	51.77
48381.50	29.46	19.80	61.62	81.64	183.02	36.93	41.83	51.79
48380.50	29.47	19.81	61.64	81.67	183.05	36.94	41.85	51.81
48379.50	29.48	19.82	61.66	81.69	183.08	36.96	41.87	51.83
48378.50	29.48	19.83	61.68	81.71	183.10	36.97	41.89	51.85
48377.50	29.49	19.85	61.70	81.73	183.12	36.98	41.91	51.87
48376.50	29.50	19.86	61.72	81.75	183.15	37.00	41.92	51.89
48375.50	29.51	19.86	61.74	81.77	183.18	37.01	41.94	51.90
48374.50	29.51	19.87	61.76	81.79	183.20	37.03	41.96	51.92
48373.50	29.52	19.88	61.78	81.81	183.22	37.04	41.98	51.94
48372.50	29.53	19.89	61.80	81.84	183.25	37.05	42.00	51.95
48371.50	29.53	19.91	61.82	81.86	183.28	37.06	42.01	51.97
48370.50	29.54	19.92	61.84	81.88	183.31	37.07	42.03	51.98
48369.50	29.55	19.93	61.86	81.91	183.33	37.08	42.05	52.00
48368.50	29.56	19.94	61.89	81.93	183.36	37.08	42.07	52.02
48367.50	29.56	19.95	61.91	81.95	183.39	37.09	42.09	52.03
48366.50	29.57	19.96	61.93	81.98	183.41	37.10	42.10	52.05
48365.50	29.57	19.97	61.95	82.00	183.44	37.11	42.12	52.06
48364.50	29.58	19.98	61.98	82.02	183.47	37.12	42.14	52.08
48363.50	29.58	19.99	62.00	82.05	183.50	37.13	42.15	52.09
48362.50	29.59	20.00	62.02	82.07	183.52	37.15	42.17	52.11
48361.50	29.60	20.00	62.04	82.09	183.55	37.16	42.19	52.13
48360.50	29.60	20.01	62.06	82.11	183.57	37.18	42.21	52.14
48359.50	29.62	20.01	62.08	82.13	183.60	37.19	42.22	52.16
48358.50	29.62	20.02	62.10	82.15	183.62	37.19	42.24	52.17
48357.50	29.63	20.03	62.11	82.17	183.64	37.20	42.26	52.18
48356.50	29.64	20.04	62.13	82.19	183.66	37.22	42.28	52.20
48355.50	29.64	20.05	62.15	82.21	183.69	37.23	42.29	52.21
48354.50	29.65	20.06	62.16	82.23	183.71	37.23	42.30	52.23
48353.50	29.66	20.07	62.18	82.24	183.73	37.24	42.32	52.24
48352.50	29.67	20.08	62.19	82.26	183.75	37.25	42.34	52.25
48351.50	29.67	20.09	62.21	82.28	183.78	37.26	42.36	52.27
48350.50	29.67	20.10	62.23	82.30	183.80	37.27	42.38	52.29
48349.50	29.67	20.11	62.26	82.33	183.83	37.28	42.40	52.30
48348.50	29.68	20.12	62.28	82.35	183.86	37.29	42.41	52.32
48347.50	29.68	20.12	62.30	82.37	183.88	37.30	42.42	52.33
48346.50	29.69	20.13	62.32	82.39	183.91	37.31	42.43	52.34
48345.50	29.70	20.14	62.34	82.41	183.93	37.32	42.45	52.35
48344.50	29.71	20.14	62.35	82.43	183.95	37.33	42.46	52.37
48343.50	29.72	20.15	62.37	82.45	183.98	37.34	42.48	52.38
48342.50	29.72	20.16	62.39	82.47	184.00	37.35	42.49	52.39
48341.50	29.73	20.17	62.41	82.49	184.02	37.35	42.50	52.41
48340.50	29.74	20.18	62.42	82.51	184.05	37.36	42.51	52.42
48339.50	29.75	20.19	62.44	82.53	184.07	37.36	42.52	52.43
48338.50	29.75	20.20	62.46	82.55	184.09	37.37	42.53	52.44
48337.50	29.76	20.21	62.47	82.56	184.11	37.37	42.54	52.45
48336.50	29.77	20.22	62.49	82.58	184.13	37.38	42.56	52.46
48335.50	29.78	20.22	62.51	82.60	184.16	37.40	42.57	52.47
48334.50	29.78	20.23	62.52	82.62	184.18	37.41	42.59	52.48
48333.50	29.78	20.23	62.54	82.63	184.20	37.43	42.60	52.49
48332.50	29.78	20.24	62.55	82.65	184.22	37.44	42.61	52.50
48331.50	29.79	20.24	62.57	82.66	184.24	37.45	42.63	52.51
48330.50	29.79	20.24	62.59	82.68	184.26	37.45	42.64	52.52
48329.50	29.79	20.24	62.60	82.70	184.28	37.46	42.65	52.53
48328.50	29.80	20.25	62.61	82.71	184.30	37.47	42.66	52.54
48327.50	29.81	20.26	62.63	82.73	184.32	37.48	42.68	52.55
48326.50	29.81	20.27	62.65	82.75	184.34	37.49	42.70	52.57
48325.50	29.81	20.28	62.67	82.77	184.37	37.50	42.71	52.58
48324.50	29.81	20.29	62.69	82.79	184.39	37.52	42.72	52.59
48323.50	29.82	20.29	62.71	82.81	184.41	37.53	42.73	52.60
48322.50	29.82	20.31	62.73	82.83	184.43	37.53	42.74	52.61
48321.50	29.82	20.31	62.74	82.85	184.46	37.54	42.75	52.62
48320.50	29.83	20.32	62.76	82.87	184.48	37.55	42.76	52.63
48319.50	29.83	20.33	62.77	82.88	184.49	37.55	42.77	52.64
48318.50	29.84	20.33	62.79	82.90	184.51	37.55	42.78	52.65
48317.50	29.84	20.34	62.80	82.91	184.54	37.55	42.79	52.66
48316.50	29.85	20.34	62.81	82.92	184.55	37.55	42.79	52.67
48315.50	29.85	20.34	62.82	82.94	184.57	37.56	42.80	52.68
48314.50	29.85	20.35	62.84	82.95	184.59	37.56	42.81	52.69
48313.50	29.85	20.35	62.85	82.97	184.61	37.56	42.82	52.70
48312.50	29.86	20.36	62.86	82.98	184.62	37.57	42.83	52.71
48311.50	29.86	20.36	62.87	82.99	184.64	37.58	42.84	52.72
48310.50	29.86	20.37	62.89	83.01	184.66	37.59	42.85	52.73
48309.50	29.86	20.38	62.91	83.03	184.68	37.60	42.86	52.74
48308.50	29.87	20.38	62.93	83.05	184.70	37.61	42.88	52.75
48307.50	29.87	20.39	62.94	83.07	184.72	37.62	42.90	52.75
48306.50	29.87	20.40	62.96	83.08	184.74	37.63	42.91	52.76
48305.50	29.87	20.40	62.97	83.10	184.76	37.64	42.92	52.77
48304.50	29.87	20.40	62.99	83.12	184.79	37.65	42.93	52.78
48303.50	29.88	20.41	63.00	83.14	184.81	37.66	42.95	52.79
48302.50	29.88	20.41	63.01	83.15	184.82	37.67	42.96	52.80
48301.50	29.88	20.41	63.03	83.16	184.84	37.67	42.97	52.81
48300.50	29.88	20.42	63.04	83.18	184.86	37.67	42.98	52.82
48299.50	29.88	20.42	63.05	83.19	184.87	37.68	42.99	52.83
48298.50	29.89	20.42	63.06	83.20	184.89	37.68	42.99	52.83
48297.50	29.89	20.43	63.07	83.21	184.90	37.68	42.99	52.84
48296.50	29.89	20.43	63.09	83.23	184.92	37.69	43.00	52.85
48295.50	29.89	20.43	63.10	83.24	184.94	37.69	43.01	52.87
48294.50	29.90	20.43	63.11	83.25	184.95	37.69	43.02	52.88
48293.50	29.90	20.43	63.13	83.27	184.97	37.69	43.03	52.89
48292.50	29.90	20.43	63.14	83.29	184.99	37.70	43.04	52.89
48291.50	29.90	20.44	63.16	83.30	185.01	37.70	43.05	52.90
48290.50	29.90	20.44	63.17	83.32	185.03	37.71	43.06	52.91
48289.50	29.90	20.44	63.19	83.34	185.05	37.71	43.06	52.92
48288.50	29.90	20.44	63.20	83.35	185.06	37.72	43.06	52.92
48287.50	29.90	20.45	63.21	83.36	185.08	37.72	43.07	52.93
48286.50	29.91	20.46	63.23	83.38	185.10	37.72	43.08	52.94
48285.50	29.90	20.47	63.24	83.39	185.11	37.72	43.09	52.94
48284.50	29.90	20.47	63.25	83.40	185.13	37.73	43.10	52.95
48283.50	29.90	20.47	63.26	83.42	185.15	37.74	43.11	52.96
48282.50	29.90	20.47	63.27	83.43	185.16	37.74	43.12	52.97
48281.50	29.90	20.47	63.29	83.44	185.17	37.75	43.13	52.98
48280.50	29.90	20.46	63.30	83.46	185.19	37.75	43.14	52.98
48279.50	29.90	20.46	63.31	83.47	185.21	37.76	43.15	52.99
48278.50	29.90	20.47	63.33	83.48	185.23	37.76	43.15	53.00
48277.50	29.90	20.47	63.34	83.50	185.25	37.76	43.16	53.01
48276.50	29.90	20.48	63.35	83.51	185.26	37.77	43.17	53.02
48275.50	29.90	20.48	63.36	83.52	185.28	37.77	43.18	53.02
48274.50	29.90	20.49	63.38	83.54	185.29	37.78	43.20	53.03
48273.50	29.90	20.49	63.39	83.55	185.31	37.78	43.21	53.03
48272.50	29.90	20.50	63.40	83.56	185.33	37.79	43.22	53.04
48271.50	29.90	20.50	63.41	83.58	185.34	37.79	43.23	53.04
48270.50	29.90	20.51	63.42	83.59	185.36	37.79	43.24	53.04
48269.50	29.90	20.52	63.43	83.60	185.37	37.78	43.24	53.04
48268.50	29.90	20.52	63.45	83.62	185.39	37.79	43.25	53.04
48267.50	29.90	20.52	63.46	83.63	185.41	37.79	43.26	53.05
48266.50	29.89	20.52	63.48	83.65	185.43	37.79	43.27	53.05
48265.50	29.89	20.52	63.49	83.66	185.44	37.80	43.28	53.06
48264.50	29.89	20.52	63.50	83.67	185.46	37.80	43.28	53.06
48263.50	29.90	20.53	63.51	83.68	185.47	37.80	43.30	53.06
48262.50	29.90	20.53	63.52	83.70	185.49	37.81	43.31	53.07
48261.50	29.89	20.53	63.54	83.71	185.51	37.82	43.32	53.07
48260.50	29.89	20.52	63.55	83.72	185.52	37.82	43.33	53.08
48259.50	29.89	20.53	63.56	83.74	185.54	37.83	43.34	53.08
48258.50	29.89	20.53	63.57	83.75	185.55	37.83	43.34	53.08
48257.50	29.89	20.54	63.58	83.76	185.57	37.84	43.35	53.08
48256.50	29.88	20.54	63.59	83.78	185.59	37.84	43.36	53.09
48255.50	29.88	20.54	63.60	83.79	185.60	37.84	43.36	53.09
48254.50	29.88	20.55	63.61	83.80	185.61	37.84	43.36	53.09
48253.50	29.87	20.55	63.62	83.81	185.63	37.84	43.36	53.10
48252.50	29.87	20.54	63.64	83.82	185.65	37.84	43.37	53.11
48251.50	29.86	20.54	63.65	83.83	185.66	37.84	43.37	53.11
48250.50	29.86	20.54	63.66	83.84	185.67	37.84	43.38	53.12
48249.50	29.86	20.53	63.67	83.86	185.69	37.84	43.39	53.12
48248.50	29.86	20.53	63.68	83.87	185.70	37.84	43.40	53.13
48247.50	29.86	20.52	63.68	83.87	185.71	37.85	43.41	53.14
48246.50	29.86	20.52	63.69	83.89	185.73	37.85	43.41	53.14
48245.50	29.86	20.53	63.70	83.90	185.74	37.85	43.42	53.15
48244.50	29.86	20.53	63.70	83.90	185.75	37.85	43.43	53.15
48243.50	29.86	20.54	63.71	83.91	185.77	37.85	43.43	53.15
48242.50	29.85	20.54	63.72	83.92	185.78	37.86	43.44	53.16
48241.50	29.85	20.53	63.73	83.93	185.80	37.85	43.44	53.17
48240.50	29.85	20.53	63.74	83.94	185.80	37.85	43.45	53.18
48239.50	29.85	20.54	63.75	83.95	185.82	37.85	43.44	53.18
48238.50	29.85	20.54	63.76	83.96	185.83	37.85	43.44	53.19
48237.50	29.85	20.54	63.77	83.97	185.84	37.86	43.44	53.19
48236.50	29.85	20.54	63.78	83.99	185.86	37.86	43.45	53.20
48235.50	29.84	20.54	63.79	84.00	185.87	37.86	43.45	53.20
48234.50	29.84	20.55	63.81	84.01	185.89	37.85	43.45	53.20
48233.50	29.84	20.55	63.82	84.02	185.90	37.85	43.45	53.20
48232.50	29.84	20.54	63.83	84.04	185.92	37.85	43.46	53.21
48231.50	29.84	20.54	63.84	84.04	185.93	37.85	43.46	53.22
48230.50	29.85	20.54	63.85	84.06	185.94	37.85	43.47	53.22
48229.50	29.84	20.55	63.86	84.07	185.95	37.85	43.48	53.23
48228.50	29.83	20.55	63.86	84.07	185.96	37.84	43.49	53.23
48227.50	29.83	20.55	63.87	84.08	185.98	37.84	43.49	53.23
48226.50	29.83	20.55	63.88	84.09	185.99	37.84	43.49	53.23
48225.50	29.83	20.55	63.89	84.10	186.00	37.85	43.49	53.23
48224.50	29.82	20.55	63.89	84.10	186.01	37.85	43.50	53.23
48223.50	29.82	20.54	63.89	84.11	186.01	37.86	43.50	53.24
48222.50	29.82	20.54	63.90	84.12	186.03	37.86	43.51	53.24
48221.50	29.81	20.53	63.91	84.13	186.04	37.86	43.50	53.24
48220.50	29.81	20.53	63.92	84.13	186.05	37.86	43.51	53.24
48219.50	29.81	20.54	63.92	84.14	186.05	37.86	43.52	53.24
48218.50	29.80	20.54	63.93	84.15	186.07	37.85	43.52	53.25
48217.50	29.79	20.55	63.94	84.16	186.08	37.85	43.53	53.25
48216.50	29.79	20.55	63.95	84.17	186.09	37.85	43.54	53.25
48215.50	29.79	20.55	63.95	84.17	186.10	37.85	43.55	53.26
48214.50	29.79	20.54	63.96	84.18	186.11	37.85	43.56	53.26
48213.50	29.78	20.54	63.97	84.19	186.13	37.85	43.57	53.25
48212.50	29.78	20.54	63.97	84.20	186.14	37.85	43.57	53.26
48211.50	29.77	20.54	63.99	84.21	186.15	37.85	43.58	53.26
48210.50	29.77	20.54	64.00	84.22	186.16	37.85	43.58	53.26
48209.50	29.76	20.54	64.01	84.23	186.17	37.84	43.58	53.26
48208.50	29.76	20.54	64.02	84.24	186.19	37.84	43.58	53.26
48207.50	29.76	20.53	64.02	84.25	186.19	37.84	43.58	53.26
48206.50	29.75	20.53	64.03	84.26	186.20	37.85	43.58	53.26
48205.50	29.75	20.52	64.04	84.27	186.22	37.85	43.58	53.26
48204.50	29.75	20.52	64.04	84.27	186.22	37.85	43.59	53.27
48203.50	29.74	20.52	64.05	84.28	186.23	37.85	43.60	53.27
48202.50	29.74	20.51	64.06	84.29	186.24	37.85	43.60	53.27
48201.50	29.73	20.51	64.07	84.30	186.25	37.85	43.61	53.27
48200.50	29.73	20.51	64.07	84.31	186.26	37.84	43.60	53.27
48199.50	29.72	20.51	64.08	84.31	186.27	37.84	43.60	53.27
48198.50	29.72	20.51	64.08	84.32	186.28	37.85	43.60	53.28
48197.50	29.72	20.51	64.09	84.32	186.29	37.85	43.60	53.28
48196.50	29.71	20.51	64.09	84.33	186.30	37.85	43.61	53.28
48195.50	29.71	20.51	64.10	84.34	186.31	37.85	43.61	53.28
48194.50	29.71	20.50	64.10	84.34	186.31	37.85	43.61	53.28
48193.50	29.70	20.50	64.10	84.34	186.32	37.84	43.61	53.28
48192.50	29.69	20.50	64.11	84.35	186.33	37.84	43.62	53.28
48191.50	29.69	20.50	64.11	84.35	186.34	37.84	43.62	53.28
48190.50	29.68	20.50	64.11	84.35	186.34	37.84	43.62	53.28
48189.50	29.68	20.50	64.12	84.36	186.35	37.83	43.62	53.28
48188.50	29.67	20.50	64.13	84.37	186.36	37.83	43.63	53.29
48187.50	29.67	20.50	64.14	84.38	186.37	37.83	43.63	53.29
48186.50	29.66	20.50	64.14	84.39	186.38	37.83	43.63	53.29
48185.50	29.66	20.50	64.15	84.40	186.39	37.83	43.63	53.28
48184.50	29.66	20.49	64.16	84.40	186.40	37.83	43.63	53.28
48183.50	29.65	20.49	64.16	84.41	186.41	37.83	43.64	53.28
48182.50	29.65	20.49	64.17	84.42	186.42	37.83	43.64	53.28
48181.50	29.65	20.48	64.17	84.42	186.43	37.83	43.64	53.28
48180.50	29.65	20.48	64.18	84.43	186.44	37.82	43.64	53.28
48179.50	29.64	20.49	64.19	84.44	186.45	37.82	43.64	53.28
48178.50	29.64	20.48	64.19	84.44	186.46	37.82	43.65	53.28
48177.50	29.63	20.48	64.20	84.45	186.47	37.82	43.65	53.28
48176.50	29.62	20.47	64.20	84.46	186.48	37.81	43.65	53.28
48175.50	29.62	20.47	64.21	84.46	186.48	37.81	43.66	53.28
48174.50	29.61	20.47	64.21	84.47	186.49	37.81	43.66	53.28
48173.50	29.61	20.47	64.22	84.47	186.50	37.81	43.66	53.27
48172.50	29.60	20.47	64.22	84.48	186.51	37.80	43.66	53.27
48171.50	29.59	20.46	64.23	84.49	186.52	37.80	43.65	53.27
48170.50	29.59	20.46	64.24	84.50	186.53	37.79	43.66	53.27
48169.50	29.59	20.45	64.24	84.50	186.53	37.78	43.67	53.26
48168.50	29.58	20.45	64.24	84.50	186.54	37.78	43.67	53.27
48167.50	29.58	20.45	64.24	84.51	186.55	37.77	43.68	53.27
48166.50	29.58	20.44	64.25	84.51	186.56	37.77	43.68	53.27
48165.50	29.57	20.44	64.25	84.52	186.56	37.77	43.68	53.27
48164.50	29.57	20.44	64.26	84.52	186.57	37.76	43.69	53.27
48163.50	29.57	20.44	64.26	84.53	186.58	37.76	43.69	53.27
48162.50	29.57	20.44	64.27	84.53	186.59	37.76	43.69	53.27
48161.50	29.56	20.43	64.27	84.54	186.59	37.76	43.68	53.26
48160.50	29.56	20.43	64.27	84.54	186.60	37.75	43.68	53.26
48159.50	29.55	20.43	64.28	84.55	186.61	37.75	43.69	53.26
48158.50	29.54	20.42	64.29	84.56	186.62	37.75	43.69	53.27
48157.50	29.54	20.41	64.29	84.56	186.63	37.75	43.69	53.27
48156.50	29.53	20.41	64.30	84.57	186.64	37.74	43.70	53.27
48155.50	29.52	20.41	64.31	84.58	186.65	37.73	43.71	53.27
48154.50	29.52	20.41	64.31	84.59	186.66	37.72	43.71	53.27
48153.50	29.51	20.41	64.32	84.59	186.67	37.72	43.71	53.27
48152.50	29.51	20.41	64.33	84.60	186.67	37.73	43.71	53.27
48151.50	29.50	20.40	64.33	84.60	186.68	37.73	43.72	53.26
48150.50	29.50	20.39	64.34	84.61	186.69	37.73	43.72	53.26
48149.50	29.49	20.38	64.34	84.62	186.70	37.72	43.72	53.26
48148.50	29.48	20.38	64.34	84.62	186.70	37.72	43.73	53.26
48147.50	29.48	20.38	64.34	84.62	186.71	37.72	43.74	53.26
48146.50	29.47	20.38	64.35	84.63	186.72	37.71	43.74	53.26
48145.50	29.46	20.37	64.35	84.63	186.72	37.71	43.74	53.26
48144.50	29.46	20.36	64.35	84.63	186.72	37.71	43.74	53.26
48143.50	29.45	20.36	64.35	84.63	186.73	37.71	43.74	53.26
48142.50	29.45	20.36	64.36	84.64	186.73	37.71	43.74	53.25
48141.50	29.44	20.36	64.36	84.64	186.74	37.70	43.74	53.26
48140.50	29.44	20.36	64.36	84.65	186.74	37.70	43.75	53.26
48139.50	29.44	20.35	64.37	84.65	186.75	37.69	43.75	53.26
48138.50	29.44	20.35	64.38	84.66	186.76	37.68	43.75	53.25
48137.50	29.43	20.35	64.38	84.66	186.77	37.68	43.75	53.25
48136.50	29.42	20.36	64.39	84.67	186.77	37.67	43.75	53.25
48135.50	29.40	20.36	64.39	84.67	186.78	37.67	43.75	53.25
48134.50	29.40	20.35	64.40	84.68	186.79	37.67	43.75	53.25
48133.50	29.39	20.35	64.40	84.69	186.79	37.67	43.75	53.25
48132.50	29.39	20.35	64.40	84.69	186.80	37.66	43.74	53.24
48131.50	29.39	20.35	64.40	84.69	186.80	37.65	43.73	53.25
48130.50	29.38	20.35	64.40	84.69	186.81	37.65	43.73	53.25
48129.50	29.38	20.34	64.41	84.70	186.81	37.64	43.73	53.25
48128.50	29.37	20.34	64.41	84.70	186.82	37.64	43.73	53.24
48127.50	29.36	20.33	64.41	84.70	186.82	37.63	43.72	53.24
48126.50	29.35	20.33	64.41	84.70	186.82	37.63	43.73	53.24
48125.50	29.35	20.33	64.41	84.70	186.83	37.63	43.74	53.24
48124.50	29.34	20.32	64.41	84.71	186.84	37.62	43.74	53.24
48123.50	29.33	20.32	64.41	84.71	186.84	37.61	43.74	53.24
48122.50	29.32	20.32	64.42	84.71	186.84	37.61	43.75	53.24
48121.50	29.32	20.31	64.42	84.71	186.85	37.60	43.76	53.24
48120.50	29.31	20.31	64.42	84.72	186.86	37.59	43.77	53.23
48119.50	29.30	20.29	64.43	84.72	186.86	37.59	43.76	53.23
48118.50	29.30	20.28	64.43	84.73	186.87	37.58	43.76	53.22
48117.50	29.29	20.28	64.44	84.73	186.88	37.58	43.76	53.22
48116.50	29.29	20.28	64.44	84.74	186.88	37.58	43.76	53.22
48115.50	29.28	20.27	64.45	84.75	186.89	37.58	43.76	53.21
48114.50	29.28	20.27	64.45	84.75	186.89	37.57	43.76	53.21
48113.50	29.27	20.27	64.46	84.75	186.90	37.57	43.76	53.21
48112.50	29.27	20.26	64.46	84.76	186.91	37.57	43.76	53.21
48111.50	29.26	20.26	64.46	84.76	186.91	37.56	43.77	53.21
48110.50	29.25	20.26	64.46	84.76	186.92	37.56	43.77	53.21
48109.50	29.25	20.26	64.47	84.77	186.92	37.55	43.76	53.20
48108.50	29.24	20.25	64.47	84.77	186.93	37.55	43.76	53.20
48107.50	29.23	20.25	64.47	84.77	186.93	37.55	43.75	53.20
48106.50	29.22	20.24	64.46	84.76	186.93	37.55	43.75	53.19
48105.50	29.22	20.24	64.46	84.77	186.93	37.55	43.75	53.19
48104.50	29.20	20.23	64.47	84.77	186.94	37.55	43.75	53.19
48103.50	29.20	20.23	64.46	84.77	186.94	37.56	43.75	53.18
48102.50	29.20	20.23	64.47	84.77	186.94	37.56	43.76	53.18
48101.50	29.19	20.22	64.47	84.77	186.95	37.56	43.76	53.17
48100.50	29.18	20.22	64.47	84.78	186.96	37.56	43.76	53.17
48099.50	29.18	20.21	64.47	84.78	186.96	37.55	43.76	53.17
48098.50	29.17	20.21	64.47	84.78	186.96	37.54	43.76	53.17
48097.50	29.16	20.20	64.48	84.79	186.97	37.53	43.77	53.17
48096.50	29.16	20.19	64.49	84.79	186.98	37.53	43.77	53.17
48095.50	29.16	20.19	64.49	84.80	186.98	37.53	43.77	53.17
48094.50	29.15	20.18	64.48	84.79	186.98	37.52	43.77	53.17
48093.50	29.14	20.17	64.49	84.80	186.99	37.51	43.77	53.16
48092.50	29.14	20.17	64.49	84.80	187.00	37.50	43.77	53.16
48091.50	29.13	20.16	64.49	84.80	187.00	37.49	43.76	53.15
48090.50	29.12	20.16	64.49	84.81	187.00	37.49	43.76	53.15
48089.50	29.11	20.15	64.50	84.81	187.01	37.48	43.76	53.15
48088.50	29.11	20.15	64.50	84.82	187.01	37.48	43.76	53.15
48087.50	29.10	20.15	64.50	84.82	187.02	37.48	43.77	53.15
48086.50	29.09	20.14	64.50	84.82	187.02	37.48	43.77	53.14
48085.50	29.09	20.14	64.51	84.82	187.03	37.48	43.77	53.14
48084.50	29.08	20.14	64.51	84.83	187.03	37.47	43.77	53.13
48083.50	29.07	20.13	64.51	84.83	187.03	37.47	43.77	53.13
48082.50	29.06	20.13	64.52	84.83	187.04	37.46	43.76	53.13
48081.50	29.05	20.12	64.52	84.84	187.04	37.45	43.77	53.13
48080.50	29.05	20.12	64.52	84.84	187.05	37.44	43.77	53.13
48079.50	29.04	20.11	64.52	84.83	187.04	37.43	43.77	53.13
48078.50	29.03	20.10	64.52	84.83	187.04	37.42	43.76	53.12
48077.50	29.02	20.10	64.52	84.84	187.05	37.42	43.75	53.12
48076.50	29.01	20.09	64.52	84.84	187.05	37.41	43.75	53.12
48075.50	29.01	20.09	64.52	84.83	187.05	37.40	43.75	53.12
48074.50	29.00	20.08	64.52	84.83	187.05	37.40	43.74	53.12
48073.50	28.99	20.07	64.52	84.84	187.06	37.39	43.74	53.11
48072.50	28.98	20.07	64.52	84.84	187.06	37.39	43.74	53.11
48071.50	28.98	20.06	64.52	84.84	187.07	37.39	43.75	53.10
48070.50	28.97	20.06	64.52	84.85	187.07	37.39	43.74	53.10
48069.50	28.96	20.05	64.53	84.85	187.08	37.39	43.74	53.10
48068.50	28.95	20.04	64.52	84.85	187.08	37.38	43.74	53.09
48067.50	28.95	20.04	64.53	84.85	187.08	37.38	43.73	53.09
48066.50	28.94	20.04	64.53	84.85	187.09	37.37	43.73	53.09
48065.50	28.93	20.03	64.53	84.86	187.09	37.37	43.73	53.08
48064.50	28.92	20.02	64.53	84.86	187.10	37.37	43.73	53.08
48063.50	28.92	20.02	64.53	84.86	187.10	37.36	43.73	53.08
48062.50	28.91	20.02	64.54	84.86	187.10	37.36	43.73	53.07
48061.50	28.90	20.02	64.54	84.87	187.11	37.35	43.73	53.07
48060.50	28.89	20.01	64.53	84.86	187.11	37.34	43.73	53.07
48059.50	28.89	20.00	64.53	84.86	187.11	37.34	43.73	53.06
48058.50	28.88	20.00	64.53	84.86	187.12	37.33	43.73	53.06
48057.50	28.87	20.00	64.54	84.87	187.12	37.33	43.72	53.06
48056.50	28.86	19.99	64.54	84.87	187.12	37.32	43.72	53.05
48055.50	28.85	19.99	64.53	84.87	187.12	37.31	43.72	53.04
48054.50	28.85	19.98	64.53	84.86	187.12	37.31	43.72	53.04
48053.50	28.84	19.98	64.53	84.87	187.13	37.30	43.73	53.04
48052.50	28.83	19.97	64.53	84.87	187.13	37.29	43.72	53.04
48051.50	28.82	19.96	64.53	84.86	187.13	37.29	43.71	53.03
48050.50	28.82	19.95	64.53	84.86	187.13	37.29	43.71	53.03
48049.50	28.82	19.94	64.53	84.86	187.13	37.28	43.71	53.02
48048.50	28.81	19.94	64.53	84.86	187.13	37.28	43.71	53.02
48047.50	28.81	19.93	64.53	84.87	187.14	37.27	43.71	53.02
48046.50	28.80	19.93	64.54	84.87	187.14	37.27	43.71	53.02
48045.50	28.80	19.92	64.54	84.87	187.15	37.26	43.70	53.01
48044.50	28.79	19.92	64.54	84.88	187.15	37.26	43.70	53.01
48043.50	28.78	19.91	64.54	84.88	187.16	37.26	43.70	53.00
48042.50	28.77	19.91	64.54	84.88	187.16	37.25	43.70	53.00
48041.50	28.76	19.90	64.55	84.88	187.16	37.25	43.69	52.99
48040.50	28.75	19.89	64.55	84.89	187.17	37.24	43.68	52.99
48039.50	28.75	19.88	64.55	84.89	187.17	37.24	43.68	52.98
48038.50	28.74	19.88	64.55	84.89	187.17	37.23	43.68	52.98
48037.50	28.73	19.88	64.55	84.89	187.18	37.22	43.68	52.97
48036.50	28.72	19.87	64.55	84.89	187.18	37.22	43.67	52.97
48035.50	28.71	19.87	64.55	84.89	187.18	37.22	43.67	52.97
48034.50	28.71	19.86	64.55	84.89	187.19	37.21	43.67	52.97
48033.50	28.70	19.86	64.55	84.89	187.19	37.20	43.67	52.96
48032.50	28.69	19.85	64.55	84.89	187.19	37.20	43.67	52.96
48031.50	28.69	19.84	64.55	84.89	187.19	37.20	43.67	52.95
48030.50	28.68	19.84	64.55	84.89	187.19	37.20	43.67	52.94
48029.50	28.67	19.83	64.55	84.89	187.20	37.19	43.67	52.94
48028.50	28.67	19.82	64.54	84.89	187.19	37.19	43.67	52.94
48027.50	28.66	19.82	64.54	84.89	187.19	37.18	43.67	52.93
48026.50	28.65	19.81	64.54	84.89	187.20	37.18	43.67	52.93
48025.50	28.65	19.81	64.54	84.89	187.20	37.18	43.67	52.92
48024.50	28.64	19.80	64.54	84.89	187.20	37.17	43.66	52.92
48023.50	28.63	19.80	64.55	84.90	187.21	37.17	43.66	52.91
48022.50	28.63	19.80	64.55	84.90	187.21	37.16	43.66	52.91
48021.50	28.62	19.79	64.55	84.90	187.22	37.15	43.66	52.91
48020.50	28.61	19.79	64.56	84.90	187.22	37.15	43.66	52.90
48019.50	28.61	19.79	64.56	84.91	187.22	37.14	43.65	52.90
48018.50	28.61	19.78	64.56	84.91	187.23	37.14	43.64	52.89
48017.50	28.60	19.78	64.56	84.91	187.23	37.13	43.64	52.89
48016.50	28.59	19.77	64.56	84.91	187.23	37.12	43.63	52.88
48015.50	28.58	19.77	64.56	84.91	187.23	37.12	43.63	52.88
48014.50	28.57	19.76	64.56	84.91	187.24	37.11	43.63	52.87
48013.50	28.56	19.76	64.56	84.91	187.24	37.11	43.63	52.87
48012.50	28.54	19.76	64.56	84.91	187.24	37.10	43.62	52.86
48011.50	28.54	19.75	64.56	84.91	187.24	37.09	43.62	52.85
48010.50	28.52	19.75	64.56	84.92	187.25	37.08	43.61	52.85
48009.50	28.51	19.75	64.56	84.92	187.25	37.08	43.60	52.84
48008.50	28.51	19.74	64.56	84.92	187.25	37.07	43.60	52.84
48007.50	28.49	19.74	64.57	84.92	187.25	37.07	43.60	52.84
48006.50	28.48	19.73	64.57	84.92	187.25	37.06	43.61	52.83
48005.50	28.48	19.73	64.57	84.92	187.26	37.05	43.61	52.83
48004.50	28.47	19.72	64.57	84.92	187.26	37.04	43.60	52.82
48003.50	28.46	19.72	64.57	84.93	187.27	37.03	43.60	52.82
48002.50	28.45	19.71	64.56	84.92	187.26	37.03	43.60	52.81
48001.50	28.44	19.71	64.56	84.92	187.26	37.02	43.59	52.80
[truncated: 47,816 more rows]
