# Supplementary material for: Mysteriously high Δ 14 C of the glacial atmosphere: influence of 14 C production and carbon cycle changes
Source: Copernicus journal article supplement (doi:10.5194/cp-16-1159-2020), 2020-07-09
Supplement: Supplementary file 2 [file cp-16-1159-2020-supplement.zip › fig07,08,10_data/Fig10a_data.csv]

# Time (yr BP)	IntCal+PAL (rel. to PI)	IntCal+CIRC (rel. to PI)	IntCal+VENT (rel. to PI)	IntCal+VENTx (rel. to PI)	IntCal+BIO (rel. to PI)	IntCal+PHYS-BIO (rel. to PI)	IntCal+PHYS-BIOx (rel. to PI)	Hulu+PAL (rel. to PI)	Hulu+CIRC (rel. to PI)	Hulu+VENT (rel. to PI)	Hulu+VENTx (rel. to PI)	Hulu+BIO (rel. to PI)	Hulu+PHYS-BIO (rel. to PI)	Hulu+PHYS-BIOx (rel. to PI)
49999.50	1.27	1.21	1.19	1.09	1.26	1.25	1.24	1.00	1.00	0.98	0.91	0.99	1.00	0.99
49998.50	1.27	1.21	1.19	1.09	1.26	1.25	1.24	1.00	1.00	0.98	0.91	0.99	1.00	0.99
49997.50	1.27	1.21	1.19	1.09	1.26	1.25	1.24	1.01	1.00	0.98	0.91	1.00	1.00	0.99
49996.50	1.27	1.21	1.19	1.09	1.26	1.25	1.24	1.01	1.00	0.98	0.91	1.00	1.00	0.99
49995.50	1.27	1.21	1.19	1.09	1.26	1.25	1.24	1.01	1.00	0.99	0.91	1.00	1.00	0.99
49994.50	1.27	1.21	1.19	1.09	1.26	1.25	1.24	1.01	1.00	0.99	0.91	1.00	1.00	1.00
49993.50	1.27	1.21	1.19	1.09	1.26	1.24	1.24	1.01	1.00	0.99	0.91	1.00	1.00	1.00
49992.50	1.27	1.21	1.19	1.09	1.26	1.24	1.24	1.01	1.00	0.99	0.91	1.00	1.01	1.00
49991.50	1.27	1.21	1.19	1.09	1.26	1.24	1.24	1.01	1.00	0.99	0.91	1.00	1.01	1.00
49990.50	1.27	1.21	1.19	1.09	1.26	1.24	1.24	1.01	1.00	0.99	0.92	1.00	1.01	1.00
49989.50	1.27	1.21	1.19	1.09	1.26	1.24	1.24	1.01	1.00	0.99	0.92	1.00	1.01	1.00
49988.50	1.27	1.21	1.19	1.09	1.26	1.24	1.24	1.02	1.01	0.99	0.92	1.00	1.01	1.00
49987.50	1.27	1.21	1.19	1.09	1.26	1.24	1.24	1.02	1.01	0.99	0.92	1.01	1.01	1.00
49986.50	1.27	1.21	1.19	1.09	1.26	1.24	1.24	1.02	1.01	0.99	0.92	1.01	1.01	1.00
49985.50	1.27	1.20	1.19	1.09	1.26	1.24	1.24	1.02	1.01	0.99	0.92	1.01	1.01	1.00
49984.50	1.27	1.20	1.19	1.08	1.26	1.24	1.24	1.02	1.01	1.00	0.92	1.01	1.01	1.01
49983.50	1.27	1.20	1.19	1.08	1.26	1.24	1.24	1.02	1.01	1.00	0.92	1.01	1.01	1.01
49982.50	1.27	1.20	1.19	1.08	1.26	1.24	1.24	1.02	1.01	1.00	0.92	1.01	1.01	1.01
49981.50	1.27	1.20	1.19	1.08	1.26	1.24	1.24	1.02	1.01	1.00	0.92	1.01	1.02	1.01
49980.50	1.27	1.20	1.19	1.08	1.26	1.24	1.24	1.02	1.01	1.00	0.92	1.01	1.02	1.01
49979.50	1.27	1.20	1.19	1.08	1.26	1.24	1.24	1.02	1.01	1.00	0.92	1.01	1.02	1.01
49978.50	1.27	1.20	1.19	1.08	1.26	1.24	1.24	1.03	1.01	1.00	0.93	1.02	1.02	1.01
49977.50	1.27	1.20	1.19	1.08	1.26	1.24	1.24	1.03	1.01	1.00	0.93	1.02	1.02	1.01
49976.50	1.27	1.20	1.19	1.08	1.26	1.24	1.24	1.03	1.02	1.00	0.93	1.02	1.02	1.01
49975.50	1.27	1.20	1.19	1.08	1.26	1.24	1.24	1.03	1.02	1.00	0.93	1.02	1.02	1.01
49974.50	1.27	1.20	1.19	1.08	1.26	1.24	1.24	1.03	1.02	1.00	0.93	1.02	1.02	1.02
49973.50	1.27	1.20	1.19	1.08	1.26	1.24	1.24	1.03	1.02	1.00	0.93	1.02	1.02	1.02
49972.50	1.27	1.20	1.19	1.08	1.26	1.24	1.24	1.03	1.02	1.01	0.93	1.02	1.02	1.02
49971.50	1.27	1.20	1.19	1.08	1.26	1.24	1.24	1.03	1.02	1.01	0.93	1.02	1.02	1.02
49970.50	1.27	1.20	1.18	1.08	1.26	1.24	1.24	1.03	1.02	1.01	0.93	1.02	1.03	1.02
49969.50	1.27	1.20	1.18	1.08	1.26	1.24	1.24	1.04	1.02	1.01	0.93	1.02	1.03	1.02
49968.50	1.27	1.20	1.18	1.08	1.26	1.24	1.24	1.04	1.02	1.01	0.93	1.03	1.03	1.02
49967.50	1.27	1.20	1.18	1.08	1.26	1.24	1.24	1.04	1.02	1.01	0.93	1.03	1.03	1.02
49966.50	1.27	1.20	1.18	1.08	1.26	1.24	1.24	1.04	1.02	1.01	0.93	1.03	1.03	1.02
49965.50	1.27	1.20	1.18	1.08	1.26	1.24	1.24	1.04	1.02	1.01	0.93	1.03	1.03	1.02
49964.50	1.27	1.20	1.18	1.08	1.26	1.24	1.24	1.04	1.03	1.01	0.94	1.03	1.03	1.02
49963.50	1.27	1.20	1.18	1.08	1.26	1.24	1.24	1.04	1.03	1.01	0.94	1.03	1.03	1.03
49962.50	1.27	1.20	1.18	1.08	1.26	1.24	1.24	1.04	1.03	1.01	0.94	1.03	1.03	1.03
49961.50	1.27	1.20	1.18	1.08	1.26	1.24	1.24	1.04	1.03	1.01	0.94	1.03	1.03	1.03
49960.50	1.27	1.20	1.18	1.08	1.26	1.24	1.24	1.04	1.03	1.01	0.94	1.03	1.03	1.03
49959.50	1.27	1.20	1.18	1.08	1.26	1.24	1.24	1.05	1.03	1.02	0.94	1.03	1.04	1.03
49958.50	1.27	1.20	1.18	1.08	1.26	1.24	1.24	1.05	1.03	1.02	0.94	1.04	1.04	1.03
49957.50	1.27	1.20	1.18	1.08	1.26	1.24	1.24	1.05	1.03	1.02	0.94	1.04	1.04	1.03
49956.50	1.27	1.20	1.18	1.08	1.26	1.24	1.24	1.05	1.03	1.02	0.94	1.04	1.04	1.03
49955.50	1.27	1.20	1.18	1.08	1.26	1.24	1.24	1.05	1.03	1.02	0.94	1.04	1.04	1.03
49954.50	1.27	1.20	1.18	1.08	1.26	1.24	1.24	1.05	1.03	1.02	0.94	1.04	1.04	1.03
49953.50	1.27	1.20	1.18	1.08	1.26	1.24	1.24	1.05	1.03	1.02	0.94	1.04	1.04	1.03
49952.50	1.27	1.20	1.18	1.08	1.26	1.24	1.24	1.05	1.04	1.02	0.94	1.04	1.04	1.04
49951.50	1.27	1.20	1.18	1.08	1.26	1.24	1.24	1.05	1.04	1.02	0.94	1.04	1.04	1.04
49950.50	1.27	1.20	1.18	1.08	1.26	1.24	1.24	1.05	1.04	1.02	0.95	1.04	1.04	1.04
49949.50	1.27	1.20	1.18	1.08	1.26	1.24	1.24	1.06	1.04	1.02	0.95	1.04	1.04	1.04
49948.50	1.27	1.20	1.18	1.08	1.26	1.24	1.24	1.06	1.04	1.02	0.95	1.04	1.04	1.04
49947.50	1.27	1.20	1.18	1.08	1.26	1.24	1.24	1.06	1.04	1.02	0.95	1.05	1.05	1.04
49946.50	1.27	1.20	1.18	1.08	1.26	1.24	1.24	1.06	1.04	1.03	0.95	1.05	1.05	1.04
49945.50	1.27	1.20	1.18	1.08	1.26	1.24	1.24	1.06	1.04	1.03	0.95	1.05	1.05	1.04
49944.50	1.27	1.20	1.18	1.08	1.26	1.24	1.24	1.06	1.04	1.03	0.95	1.05	1.05	1.04
49943.50	1.27	1.20	1.18	1.08	1.26	1.24	1.24	1.06	1.04	1.03	0.95	1.05	1.05	1.04
49942.50	1.27	1.20	1.18	1.08	1.26	1.24	1.24	1.06	1.04	1.03	0.95	1.05	1.05	1.04
49941.50	1.27	1.20	1.18	1.08	1.26	1.24	1.24	1.06	1.04	1.03	0.95	1.05	1.05	1.04
49940.50	1.27	1.20	1.18	1.08	1.26	1.24	1.24	1.06	1.04	1.03	0.95	1.05	1.05	1.05
49939.50	1.27	1.20	1.18	1.08	1.26	1.24	1.24	1.06	1.04	1.03	0.95	1.05	1.05	1.05
49938.50	1.27	1.20	1.18	1.08	1.26	1.24	1.24	1.07	1.05	1.03	0.95	1.05	1.05	1.05
49937.50	1.27	1.20	1.18	1.08	1.26	1.24	1.24	1.07	1.05	1.03	0.95	1.05	1.05	1.05
49936.50	1.27	1.20	1.18	1.08	1.26	1.24	1.24	1.07	1.05	1.03	0.95	1.06	1.05	1.05
49935.50	1.27	1.20	1.18	1.08	1.26	1.24	1.24	1.07	1.05	1.03	0.96	1.06	1.06	1.05
49934.50	1.27	1.20	1.18	1.08	1.26	1.24	1.24	1.07	1.05	1.03	0.96	1.06	1.06	1.05
49933.50	1.27	1.20	1.18	1.08	1.26	1.24	1.24	1.07	1.05	1.03	0.96	1.06	1.06	1.05
49932.50	1.27	1.20	1.18	1.08	1.26	1.24	1.24	1.07	1.05	1.03	0.96	1.06	1.06	1.05
49931.50	1.27	1.20	1.18	1.08	1.26	1.24	1.24	1.07	1.05	1.04	0.96	1.06	1.06	1.05
49930.50	1.27	1.20	1.18	1.08	1.26	1.24	1.24	1.07	1.05	1.04	0.96	1.06	1.06	1.05
49929.50	1.27	1.20	1.18	1.08	1.26	1.24	1.24	1.07	1.05	1.04	0.96	1.06	1.06	1.05
49928.50	1.27	1.20	1.18	1.08	1.26	1.24	1.24	1.07	1.05	1.04	0.96	1.06	1.06	1.05
49927.50	1.27	1.20	1.18	1.08	1.26	1.24	1.24	1.08	1.05	1.04	0.96	1.06	1.06	1.06
49926.50	1.27	1.20	1.18	1.08	1.26	1.24	1.24	1.08	1.05	1.04	0.96	1.06	1.06	1.06
49925.50	1.27	1.20	1.18	1.08	1.26	1.24	1.24	1.08	1.05	1.04	0.96	1.07	1.06	1.06
49924.50	1.27	1.20	1.18	1.08	1.26	1.24	1.24	1.08	1.06	1.04	0.96	1.07	1.06	1.06
49923.50	1.27	1.20	1.18	1.08	1.26	1.24	1.24	1.08	1.06	1.04	0.96	1.07	1.06	1.06
49922.50	1.27	1.20	1.18	1.08	1.26	1.24	1.24	1.08	1.06	1.04	0.96	1.07	1.07	1.06
49921.50	1.27	1.20	1.18	1.08	1.26	1.24	1.24	1.08	1.06	1.04	0.96	1.07	1.07	1.06
49920.50	1.27	1.20	1.18	1.08	1.26	1.24	1.24	1.08	1.06	1.04	0.96	1.07	1.07	1.06
49919.50	1.27	1.20	1.18	1.08	1.26	1.24	1.24	1.08	1.06	1.04	0.96	1.07	1.07	1.06
49918.50	1.27	1.20	1.18	1.08	1.26	1.24	1.24	1.08	1.06	1.04	0.97	1.07	1.07	1.06
49917.50	1.27	1.20	1.18	1.08	1.26	1.24	1.24	1.08	1.06	1.04	0.97	1.07	1.07	1.06
49916.50	1.27	1.20	1.18	1.08	1.26	1.24	1.24	1.09	1.06	1.04	0.97	1.07	1.07	1.06
49915.50	1.27	1.20	1.18	1.08	1.26	1.24	1.24	1.09	1.06	1.05	0.97	1.07	1.07	1.06
49914.50	1.27	1.20	1.18	1.08	1.26	1.24	1.24	1.09	1.06	1.05	0.97	1.07	1.07	1.07
49913.50	1.27	1.20	1.18	1.08	1.26	1.24	1.24	1.09	1.06	1.05	0.97	1.07	1.07	1.07
49912.50	1.27	1.20	1.18	1.08	1.26	1.24	1.24	1.09	1.06	1.05	0.97	1.08	1.07	1.07
49911.50	1.27	1.20	1.18	1.08	1.25	1.24	1.24	1.09	1.06	1.05	0.97	1.08	1.07	1.07
49910.50	1.26	1.20	1.18	1.08	1.25	1.24	1.24	1.09	1.06	1.05	0.97	1.08	1.07	1.07
49909.50	1.26	1.20	1.18	1.08	1.25	1.24	1.24	1.09	1.06	1.05	0.97	1.08	1.07	1.07
49908.50	1.26	1.20	1.18	1.08	1.25	1.24	1.24	1.09	1.07	1.05	0.97	1.08	1.07	1.07
49907.50	1.26	1.20	1.18	1.08	1.25	1.24	1.24	1.09	1.07	1.05	0.97	1.08	1.08	1.07
49906.50	1.26	1.20	1.18	1.08	1.25	1.24	1.24	1.09	1.07	1.05	0.97	1.08	1.08	1.07
49905.50	1.26	1.20	1.18	1.08	1.25	1.24	1.24	1.09	1.07	1.05	0.97	1.08	1.08	1.07
49904.50	1.26	1.20	1.18	1.08	1.25	1.24	1.24	1.09	1.07	1.05	0.97	1.08	1.08	1.07
49903.50	1.26	1.20	1.18	1.08	1.25	1.24	1.24	1.10	1.07	1.05	0.97	1.08	1.08	1.07
49902.50	1.26	1.20	1.18	1.08	1.25	1.24	1.24	1.10	1.07	1.05	0.97	1.08	1.08	1.07
49901.50	1.26	1.20	1.18	1.08	1.25	1.24	1.24	1.10	1.07	1.05	0.97	1.08	1.08	1.07
49900.50	1.26	1.20	1.18	1.08	1.25	1.24	1.24	1.10	1.07	1.05	0.97	1.08	1.08	1.07
49899.50	1.26	1.20	1.18	1.08	1.25	1.24	1.24	1.10	1.07	1.05	0.97	1.09	1.08	1.08
49898.50	1.26	1.20	1.18	1.08	1.25	1.24	1.24	1.10	1.07	1.05	0.98	1.09	1.08	1.08
49897.50	1.26	1.20	1.18	1.08	1.25	1.24	1.24	1.10	1.07	1.06	0.98	1.09	1.08	1.08
49896.50	1.26	1.20	1.18	1.08	1.25	1.24	1.24	1.10	1.07	1.06	0.98	1.09	1.08	1.08
49895.50	1.26	1.20	1.18	1.08	1.25	1.24	1.24	1.10	1.07	1.06	0.98	1.09	1.08	1.08
49894.50	1.26	1.20	1.18	1.08	1.25	1.24	1.24	1.10	1.07	1.06	0.98	1.09	1.08	1.08
49893.50	1.26	1.20	1.18	1.08	1.25	1.24	1.24	1.10	1.07	1.06	0.98	1.09	1.08	1.08
49892.50	1.26	1.20	1.18	1.08	1.25	1.24	1.24	1.10	1.07	1.06	0.98	1.09	1.08	1.08
49891.50	1.26	1.20	1.18	1.08	1.25	1.24	1.24	1.10	1.07	1.06	0.98	1.09	1.09	1.08
49890.50	1.26	1.20	1.18	1.08	1.25	1.24	1.24	1.10	1.07	1.06	0.98	1.09	1.09	1.08
49889.50	1.26	1.20	1.18	1.08	1.25	1.24	1.24	1.11	1.08	1.06	0.98	1.09	1.09	1.08
49888.50	1.26	1.20	1.18	1.08	1.25	1.24	1.24	1.11	1.08	1.06	0.98	1.09	1.09	1.08
49887.50	1.26	1.20	1.18	1.08	1.25	1.24	1.24	1.11	1.08	1.06	0.98	1.09	1.09	1.08
49886.50	1.26	1.20	1.18	1.08	1.25	1.24	1.24	1.11	1.08	1.06	0.98	1.09	1.09	1.08
49885.50	1.26	1.20	1.18	1.08	1.25	1.24	1.24	1.11	1.08	1.06	0.98	1.09	1.09	1.08
49884.50	1.26	1.20	1.18	1.08	1.25	1.24	1.24	1.11	1.08	1.06	0.98	1.10	1.09	1.08
49883.50	1.26	1.20	1.18	1.08	1.25	1.24	1.24	1.11	1.08	1.06	0.98	1.10	1.09	1.09
49882.50	1.26	1.20	1.18	1.08	1.25	1.24	1.24	1.11	1.08	1.06	0.98	1.10	1.09	1.09
49881.50	1.26	1.20	1.18	1.08	1.25	1.24	1.24	1.11	1.08	1.06	0.98	1.10	1.09	1.09
49880.50	1.26	1.20	1.18	1.08	1.25	1.24	1.24	1.11	1.08	1.06	0.98	1.10	1.09	1.09
49879.50	1.26	1.20	1.18	1.08	1.25	1.24	1.24	1.11	1.08	1.06	0.98	1.10	1.09	1.09
49878.50	1.26	1.20	1.18	1.08	1.25	1.24	1.24	1.11	1.08	1.06	0.98	1.10	1.09	1.09
49877.50	1.26	1.20	1.18	1.08	1.25	1.24	1.24	1.11	1.08	1.06	0.98	1.10	1.09	1.09
49876.50	1.26	1.20	1.18	1.08	1.25	1.24	1.24	1.11	1.08	1.07	0.98	1.10	1.09	1.09
49875.50	1.26	1.20	1.18	1.08	1.25	1.24	1.24	1.11	1.08	1.07	0.98	1.10	1.09	1.09
49874.50	1.26	1.20	1.18	1.08	1.25	1.24	1.24	1.12	1.08	1.07	0.98	1.10	1.09	1.09
49873.50	1.26	1.20	1.18	1.08	1.25	1.24	1.24	1.12	1.08	1.07	0.99	1.10	1.09	1.09
49872.50	1.26	1.20	1.18	1.08	1.25	1.24	1.23	1.12	1.08	1.07	0.99	1.10	1.10	1.09
49871.50	1.26	1.20	1.18	1.08	1.25	1.24	1.23	1.12	1.08	1.07	0.99	1.10	1.10	1.09
49870.50	1.26	1.20	1.18	1.08	1.25	1.24	1.23	1.12	1.08	1.07	0.99	1.10	1.10	1.09
49869.50	1.26	1.20	1.18	1.08	1.25	1.24	1.23	1.12	1.08	1.07	0.99	1.10	1.10	1.09
49868.50	1.26	1.20	1.18	1.08	1.25	1.24	1.23	1.12	1.08	1.07	0.99	1.10	1.10	1.09
49867.50	1.26	1.20	1.18	1.08	1.25	1.24	1.23	1.12	1.08	1.07	0.99	1.11	1.10	1.09
49866.50	1.26	1.20	1.18	1.08	1.25	1.24	1.23	1.12	1.09	1.07	0.99	1.11	1.10	1.09
49865.50	1.26	1.20	1.18	1.08	1.25	1.24	1.23	1.12	1.09	1.07	0.99	1.11	1.10	1.09
49864.50	1.26	1.20	1.18	1.08	1.25	1.24	1.23	1.12	1.09	1.07	0.99	1.11	1.10	1.09
49863.50	1.26	1.20	1.18	1.08	1.25	1.24	1.23	1.12	1.09	1.07	0.99	1.11	1.10	1.10
49862.50	1.26	1.20	1.18	1.08	1.25	1.23	1.23	1.12	1.09	1.07	0.99	1.11	1.10	1.10
49861.50	1.26	1.20	1.18	1.08	1.25	1.23	1.23	1.12	1.09	1.07	0.99	1.11	1.10	1.10
49860.50	1.26	1.20	1.18	1.08	1.25	1.23	1.23	1.12	1.09	1.07	0.99	1.11	1.10	1.10
49859.50	1.26	1.20	1.18	1.08	1.25	1.23	1.23	1.12	1.09	1.07	0.99	1.11	1.10	1.10
49858.50	1.26	1.20	1.18	1.08	1.25	1.23	1.23	1.12	1.09	1.07	0.99	1.11	1.10	1.10
49857.50	1.26	1.20	1.18	1.08	1.25	1.23	1.23	1.12	1.09	1.07	0.99	1.11	1.10	1.10
49856.50	1.26	1.20	1.18	1.08	1.25	1.23	1.23	1.12	1.09	1.07	0.99	1.11	1.10	1.10
49855.50	1.26	1.20	1.18	1.08	1.25	1.23	1.23	1.13	1.09	1.07	0.99	1.11	1.10	1.10
49854.50	1.26	1.20	1.18	1.08	1.25	1.23	1.23	1.13	1.09	1.07	0.99	1.11	1.10	1.10
49853.50	1.26	1.20	1.18	1.08	1.25	1.23	1.23	1.13	1.09	1.07	0.99	1.11	1.10	1.10
49852.50	1.26	1.20	1.18	1.08	1.25	1.23	1.23	1.13	1.09	1.07	0.99	1.11	1.10	1.10
49851.50	1.26	1.20	1.18	1.08	1.25	1.23	1.23	1.13	1.09	1.07	0.99	1.11	1.10	1.10
49850.50	1.26	1.20	1.18	1.08	1.25	1.23	1.23	1.13	1.09	1.07	0.99	1.11	1.10	1.10
49849.50	1.26	1.20	1.18	1.08	1.25	1.23	1.23	1.13	1.09	1.07	0.99	1.11	1.11	1.10
49848.50	1.26	1.20	1.18	1.08	1.25	1.23	1.23	1.13	1.09	1.07	0.99	1.11	1.11	1.10
49847.50	1.26	1.19	1.18	1.08	1.25	1.23	1.23	1.13	1.09	1.07	0.99	1.12	1.11	1.10
49846.50	1.26	1.19	1.18	1.08	1.25	1.23	1.23	1.13	1.09	1.07	0.99	1.12	1.11	1.10
49845.50	1.26	1.19	1.18	1.08	1.25	1.23	1.23	1.13	1.09	1.08	0.99	1.12	1.11	1.10
49844.50	1.26	1.19	1.18	1.08	1.25	1.23	1.23	1.13	1.09	1.08	0.99	1.12	1.11	1.10
49843.50	1.26	1.19	1.18	1.08	1.25	1.23	1.23	1.13	1.09	1.08	0.99	1.12	1.11	1.10
49842.50	1.26	1.19	1.18	1.08	1.25	1.23	1.23	1.13	1.09	1.08	0.99	1.12	1.11	1.10
49841.50	1.26	1.19	1.18	1.08	1.25	1.23	1.23	1.13	1.09	1.08	0.99	1.12	1.11	1.10
49840.50	1.26	1.19	1.18	1.08	1.25	1.23	1.23	1.13	1.09	1.08	0.99	1.12	1.11	1.10
49839.50	1.26	1.19	1.18	1.08	1.25	1.23	1.23	1.13	1.09	1.08	0.99	1.12	1.11	1.10
49838.50	1.26	1.19	1.18	1.08	1.25	1.23	1.23	1.13	1.09	1.08	0.99	1.12	1.11	1.11
49837.50	1.26	1.19	1.18	1.08	1.25	1.23	1.23	1.13	1.09	1.08	0.99	1.12	1.11	1.11
49836.50	1.26	1.19	1.18	1.08	1.25	1.23	1.23	1.13	1.09	1.08	0.99	1.12	1.11	1.11
49835.50	1.26	1.19	1.18	1.08	1.25	1.23	1.23	1.13	1.09	1.08	0.99	1.12	1.11	1.11
49834.50	1.26	1.19	1.18	1.08	1.25	1.23	1.23	1.13	1.09	1.08	0.99	1.12	1.11	1.11
49833.50	1.26	1.19	1.18	1.08	1.25	1.23	1.23	1.13	1.09	1.08	1.00	1.12	1.11	1.11
49832.50	1.26	1.19	1.18	1.08	1.25	1.23	1.23	1.13	1.09	1.08	1.00	1.12	1.11	1.11
49831.50	1.26	1.19	1.18	1.08	1.25	1.23	1.23	1.14	1.10	1.08	1.00	1.12	1.11	1.11
49830.50	1.26	1.19	1.18	1.08	1.25	1.23	1.23	1.14	1.10	1.08	1.00	1.12	1.11	1.11
49829.50	1.26	1.19	1.17	1.08	1.25	1.23	1.23	1.14	1.10	1.08	1.00	1.12	1.11	1.11
49828.50	1.26	1.19	1.17	1.08	1.25	1.23	1.23	1.14	1.10	1.08	1.00	1.12	1.11	1.11
49827.50	1.26	1.19	1.17	1.08	1.25	1.23	1.23	1.14	1.10	1.08	1.00	1.12	1.11	1.11
49826.50	1.26	1.19	1.17	1.08	1.25	1.23	1.23	1.14	1.10	1.08	1.00	1.12	1.11	1.11
49825.50	1.26	1.19	1.17	1.08	1.25	1.23	1.23	1.14	1.10	1.08	1.00	1.12	1.11	1.11
49824.50	1.26	1.19	1.17	1.08	1.25	1.23	1.23	1.14	1.10	1.08	1.00	1.12	1.11	1.11
49823.50	1.26	1.19	1.17	1.08	1.25	1.23	1.23	1.14	1.10	1.08	1.00	1.12	1.11	1.11
49822.50	1.26	1.19	1.17	1.08	1.25	1.23	1.23	1.14	1.10	1.08	1.00	1.12	1.11	1.11
49821.50	1.26	1.19	1.17	1.08	1.25	1.23	1.23	1.14	1.10	1.08	1.00	1.12	1.11	1.11
49820.50	1.26	1.19	1.17	1.08	1.25	1.23	1.23	1.14	1.10	1.08	1.00	1.12	1.11	1.11
49819.50	1.26	1.19	1.17	1.08	1.25	1.23	1.23	1.14	1.10	1.08	1.00	1.13	1.11	1.11
49818.50	1.26	1.19	1.17	1.08	1.25	1.23	1.23	1.14	1.10	1.08	1.00	1.13	1.11	1.11
49817.50	1.26	1.19	1.17	1.08	1.25	1.23	1.23	1.14	1.10	1.08	1.00	1.13	1.11	1.11
49816.50	1.26	1.19	1.17	1.08	1.25	1.23	1.23	1.14	1.10	1.08	1.00	1.13	1.11	1.11
49815.50	1.26	1.19	1.17	1.08	1.25	1.23	1.23	1.14	1.10	1.08	1.00	1.13	1.11	1.11
49814.50	1.26	1.19	1.17	1.08	1.25	1.23	1.23	1.14	1.10	1.08	1.00	1.13	1.11	1.11
49813.50	1.26	1.19	1.17	1.08	1.25	1.23	1.23	1.14	1.10	1.08	1.00	1.13	1.11	1.11
49812.50	1.26	1.19	1.17	1.08	1.25	1.23	1.23	1.14	1.10	1.08	1.00	1.13	1.11	1.11
49811.50	1.26	1.19	1.17	1.08	1.25	1.23	1.23	1.14	1.10	1.08	1.00	1.13	1.11	1.11
49810.50	1.26	1.19	1.17	1.07	1.25	1.23	1.23	1.14	1.10	1.08	1.00	1.13	1.11	1.11
49809.50	1.26	1.19	1.17	1.07	1.25	1.23	1.23	1.14	1.10	1.08	1.00	1.13	1.11	1.11
49808.50	1.26	1.19	1.17	1.07	1.25	1.23	1.23	1.14	1.10	1.08	1.00	1.13	1.11	1.11
49807.50	1.26	1.19	1.17	1.07	1.25	1.23	1.23	1.14	1.10	1.08	1.00	1.13	1.12	1.11
49806.50	1.26	1.19	1.17	1.07	1.25	1.23	1.23	1.14	1.10	1.08	1.00	1.13	1.12	1.11
49805.50	1.26	1.19	1.17	1.07	1.25	1.23	1.23	1.14	1.10	1.08	1.00	1.13	1.12	1.11
49804.50	1.26	1.19	1.17	1.07	1.25	1.23	1.23	1.14	1.10	1.08	1.00	1.13	1.12	1.11
49803.50	1.26	1.19	1.17	1.07	1.25	1.23	1.23	1.14	1.10	1.08	1.00	1.13	1.12	1.11
49802.50	1.26	1.19	1.17	1.07	1.25	1.23	1.23	1.14	1.10	1.08	1.00	1.13	1.12	1.11
49801.50	1.26	1.19	1.17	1.07	1.25	1.23	1.23	1.14	1.10	1.08	1.00	1.13	1.12	1.11
49800.50	1.26	1.19	1.17	1.07	1.25	1.23	1.23	1.14	1.10	1.08	1.00	1.13	1.12	1.11
49799.50	1.26	1.19	1.17	1.07	1.25	1.23	1.23	1.14	1.10	1.08	1.00	1.13	1.12	1.11
49798.50	1.25	1.19	1.17	1.07	1.25	1.23	1.23	1.14	1.10	1.08	1.00	1.13	1.12	1.11
49797.50	1.25	1.19	1.17	1.07	1.25	1.23	1.23	1.14	1.10	1.08	1.00	1.13	1.12	1.11
49796.50	1.25	1.19	1.17	1.07	1.25	1.23	1.23	1.14	1.10	1.08	1.00	1.13	1.12	1.11
49795.50	1.25	1.19	1.17	1.07	1.25	1.23	1.23	1.14	1.10	1.08	1.00	1.13	1.12	1.11
49794.50	1.25	1.19	1.17	1.07	1.24	1.23	1.23	1.14	1.10	1.08	1.00	1.13	1.12	1.11
49793.50	1.25	1.19	1.17	1.07	1.24	1.23	1.23	1.14	1.10	1.08	1.00	1.13	1.12	1.11
49792.50	1.25	1.19	1.17	1.07	1.24	1.23	1.23	1.14	1.10	1.08	1.00	1.13	1.12	1.11
49791.50	1.25	1.19	1.17	1.07	1.24	1.23	1.23	1.14	1.10	1.08	1.00	1.13	1.12	1.11
49790.50	1.25	1.19	1.17	1.07	1.24	1.23	1.23	1.14	1.10	1.08	1.00	1.13	1.12	1.11
49789.50	1.25	1.19	1.17	1.07	1.24	1.23	1.23	1.14	1.10	1.08	1.00	1.13	1.12	1.11
49788.50	1.25	1.19	1.17	1.07	1.24	1.23	1.23	1.14	1.10	1.08	1.00	1.13	1.12	1.11
49787.50	1.25	1.19	1.17	1.07	1.24	1.23	1.23	1.14	1.10	1.08	1.00	1.13	1.12	1.11
49786.50	1.25	1.19	1.17	1.07	1.24	1.23	1.23	1.14	1.10	1.08	1.00	1.13	1.12	1.11
49785.50	1.25	1.19	1.17	1.07	1.24	1.23	1.23	1.14	1.10	1.08	1.00	1.13	1.12	1.11
49784.50	1.25	1.19	1.17	1.07	1.24	1.23	1.23	1.14	1.10	1.08	1.00	1.13	1.12	1.11
49783.50	1.25	1.19	1.17	1.07	1.24	1.23	1.23	1.14	1.10	1.08	1.00	1.13	1.12	1.11
49782.50	1.25	1.19	1.17	1.07	1.24	1.23	1.23	1.14	1.10	1.08	1.00	1.13	1.12	1.11
49781.50	1.25	1.19	1.17	1.07	1.24	1.23	1.23	1.14	1.10	1.08	1.00	1.13	1.12	1.11
49780.50	1.25	1.19	1.17	1.07	1.24	1.23	1.23	1.14	1.10	1.08	1.00	1.13	1.12	1.11
49779.50	1.25	1.19	1.17	1.07	1.24	1.23	1.23	1.14	1.10	1.08	1.00	1.13	1.12	1.11
49778.50	1.25	1.19	1.17	1.07	1.24	1.23	1.23	1.14	1.10	1.08	1.00	1.13	1.12	1.11
49777.50	1.25	1.19	1.17	1.07	1.24	1.23	1.23	1.14	1.10	1.08	1.00	1.13	1.12	1.11
49776.50	1.25	1.19	1.17	1.07	1.24	1.23	1.23	1.14	1.10	1.08	0.99	1.13	1.12	1.11
49775.50	1.25	1.19	1.17	1.07	1.24	1.23	1.23	1.14	1.10	1.08	0.99	1.13	1.12	1.11
49774.50	1.25	1.19	1.17	1.07	1.24	1.23	1.23	1.14	1.10	1.08	0.99	1.13	1.12	1.11
49773.50	1.25	1.19	1.17	1.07	1.24	1.23	1.23	1.14	1.10	1.08	0.99	1.13	1.12	1.11
49772.50	1.25	1.19	1.17	1.07	1.24	1.23	1.23	1.14	1.10	1.08	0.99	1.13	1.12	1.11
49771.50	1.25	1.19	1.17	1.07	1.24	1.23	1.23	1.14	1.10	1.08	0.99	1.13	1.12	1.11
49770.50	1.25	1.19	1.17	1.07	1.24	1.23	1.23	1.14	1.10	1.08	0.99	1.13	1.12	1.11
49769.50	1.25	1.19	1.17	1.07	1.24	1.23	1.23	1.14	1.10	1.08	0.99	1.13	1.12	1.11
49768.50	1.25	1.19	1.17	1.07	1.24	1.23	1.23	1.14	1.10	1.08	0.99	1.13	1.12	1.11
49767.50	1.25	1.19	1.17	1.07	1.24	1.23	1.23	1.14	1.10	1.08	0.99	1.13	1.12	1.11
49766.50	1.25	1.19	1.17	1.07	1.24	1.23	1.23	1.14	1.10	1.08	0.99	1.13	1.11	1.11
49765.50	1.25	1.19	1.17	1.07	1.24	1.23	1.23	1.14	1.09	1.08	0.99	1.13	1.11	1.11
49764.50	1.25	1.19	1.17	1.07	1.24	1.23	1.23	1.14	1.09	1.08	0.99	1.13	1.11	1.11
49763.50	1.25	1.19	1.17	1.07	1.24	1.23	1.23	1.14	1.09	1.08	0.99	1.13	1.11	1.11
49762.50	1.25	1.19	1.17	1.07	1.24	1.23	1.23	1.14	1.09	1.08	0.99	1.13	1.11	1.11
49761.50	1.25	1.19	1.17	1.07	1.24	1.23	1.23	1.14	1.09	1.08	0.99	1.13	1.11	1.11
49760.50	1.25	1.19	1.17	1.07	1.24	1.23	1.23	1.14	1.09	1.08	0.99	1.13	1.11	1.11
49759.50	1.25	1.19	1.17	1.07	1.24	1.23	1.23	1.14	1.09	1.08	0.99	1.13	1.11	1.11
49758.50	1.25	1.19	1.17	1.07	1.24	1.23	1.23	1.14	1.09	1.08	0.99	1.13	1.11	1.11
49757.50	1.25	1.19	1.17	1.07	1.24	1.23	1.23	1.14	1.09	1.08	0.99	1.13	1.11	1.11
49756.50	1.25	1.19	1.17	1.07	1.24	1.23	1.22	1.14	1.09	1.08	0.99	1.13	1.11	1.11
49755.50	1.25	1.19	1.17	1.07	1.24	1.23	1.22	1.14	1.09	1.08	0.99	1.13	1.11	1.11
49754.50	1.25	1.19	1.17	1.07	1.24	1.23	1.22	1.14	1.09	1.07	0.99	1.13	1.11	1.11
49753.50	1.25	1.19	1.17	1.07	1.24	1.23	1.22	1.14	1.09	1.07	0.99	1.13	1.11	1.11
49752.50	1.25	1.19	1.17	1.07	1.24	1.23	1.22	1.14	1.09	1.07	0.99	1.13	1.11	1.11
49751.50	1.25	1.19	1.17	1.07	1.24	1.23	1.22	1.14	1.09	1.07	0.99	1.13	1.11	1.11
49750.50	1.25	1.19	1.17	1.07	1.24	1.23	1.22	1.14	1.09	1.07	0.99	1.13	1.11	1.11
49749.50	1.25	1.19	1.17	1.07	1.24	1.22	1.22	1.14	1.09	1.07	0.99	1.13	1.11	1.11
49748.50	1.25	1.19	1.17	1.07	1.24	1.22	1.22	1.14	1.09	1.07	0.99	1.13	1.11	1.11
49747.50	1.25	1.19	1.17	1.07	1.24	1.22	1.22	1.14	1.09	1.07	0.99	1.13	1.11	1.11
49746.50	1.25	1.19	1.17	1.07	1.24	1.22	1.22	1.14	1.09	1.07	0.99	1.13	1.11	1.11
49745.50	1.25	1.19	1.17	1.07	1.24	1.22	1.22	1.14	1.09	1.07	0.99	1.13	1.11	1.11
49744.50	1.25	1.19	1.17	1.07	1.24	1.22	1.22	1.14	1.09	1.07	0.99	1.13	1.11	1.11
49743.50	1.25	1.19	1.17	1.07	1.24	1.22	1.22	1.14	1.09	1.07	0.99	1.13	1.11	1.11
49742.50	1.25	1.19	1.17	1.07	1.24	1.22	1.22	1.14	1.09	1.07	0.99	1.13	1.11	1.11
49741.50	1.25	1.19	1.17	1.07	1.24	1.22	1.22	1.14	1.09	1.07	0.99	1.13	1.11	1.11
49740.50	1.25	1.19	1.17	1.07	1.24	1.22	1.22	1.14	1.09	1.07	0.99	1.13	1.11	1.11
49739.50	1.25	1.19	1.17	1.07	1.24	1.22	1.22	1.14	1.09	1.07	0.99	1.13	1.11	1.11
49738.50	1.25	1.19	1.17	1.07	1.24	1.22	1.22	1.14	1.09	1.07	0.99	1.13	1.11	1.11
49737.50	1.25	1.19	1.17	1.07	1.24	1.22	1.22	1.14	1.09	1.07	0.98	1.13	1.11	1.11
49736.50	1.25	1.19	1.17	1.07	1.24	1.22	1.22	1.14	1.09	1.07	0.98	1.12	1.11	1.11
49735.50	1.25	1.19	1.17	1.07	1.24	1.22	1.22	1.14	1.09	1.07	0.98	1.12	1.11	1.11
49734.50	1.25	1.19	1.17	1.07	1.24	1.22	1.22	1.14	1.09	1.07	0.98	1.12	1.11	1.11
49733.50	1.25	1.19	1.17	1.07	1.24	1.22	1.22	1.14	1.09	1.07	0.98	1.12	1.11	1.11
49732.50	1.25	1.19	1.17	1.07	1.24	1.22	1.22	1.14	1.09	1.07	0.98	1.12	1.11	1.11
49731.50	1.25	1.19	1.17	1.07	1.24	1.22	1.22	1.14	1.08	1.07	0.98	1.12	1.11	1.11
49730.50	1.25	1.19	1.17	1.07	1.24	1.22	1.22	1.14	1.08	1.07	0.98	1.12	1.11	1.11
49729.50	1.25	1.19	1.17	1.07	1.24	1.22	1.22	1.14	1.08	1.07	0.98	1.12	1.11	1.10
49728.50	1.25	1.19	1.17	1.07	1.24	1.22	1.22	1.14	1.08	1.07	0.98	1.12	1.11	1.10
49727.50	1.25	1.19	1.17	1.07	1.24	1.22	1.22	1.13	1.08	1.07	0.98	1.12	1.11	1.10
49726.50	1.25	1.18	1.17	1.07	1.24	1.22	1.22	1.13	1.08	1.07	0.98	1.12	1.11	1.10
49725.50	1.25	1.18	1.17	1.07	1.24	1.22	1.22	1.13	1.08	1.06	0.98	1.12	1.10	1.10
49724.50	1.25	1.18	1.17	1.07	1.24	1.22	1.22	1.13	1.08	1.06	0.98	1.12	1.10	1.10
49723.50	1.25	1.18	1.17	1.07	1.24	1.22	1.22	1.13	1.08	1.06	0.98	1.12	1.10	1.10
49722.50	1.25	1.18	1.17	1.07	1.24	1.22	1.22	1.13	1.08	1.06	0.98	1.12	1.10	1.10
49721.50	1.25	1.18	1.17	1.07	1.24	1.22	1.22	1.13	1.08	1.06	0.98	1.12	1.10	1.10
49720.50	1.25	1.18	1.17	1.07	1.24	1.22	1.22	1.13	1.08	1.06	0.98	1.12	1.10	1.10
49719.50	1.25	1.18	1.17	1.07	1.24	1.22	1.22	1.13	1.08	1.06	0.98	1.12	1.10	1.10
49718.50	1.25	1.18	1.17	1.07	1.24	1.22	1.22	1.13	1.08	1.06	0.98	1.12	1.10	1.10
49717.50	1.25	1.18	1.17	1.07	1.24	1.22	1.22	1.13	1.08	1.06	0.98	1.12	1.10	1.10
49716.50	1.25	1.18	1.17	1.07	1.24	1.22	1.22	1.13	1.08	1.06	0.98	1.12	1.10	1.10
49715.50	1.25	1.18	1.17	1.07	1.24	1.22	1.22	1.13	1.08	1.06	0.98	1.12	1.10	1.10
49714.50	1.25	1.18	1.17	1.07	1.24	1.22	1.22	1.13	1.08	1.06	0.98	1.12	1.10	1.10
49713.50	1.25	1.18	1.17	1.07	1.24	1.22	1.22	1.13	1.08	1.06	0.97	1.12	1.10	1.10
49712.50	1.25	1.18	1.17	1.07	1.24	1.22	1.22	1.13	1.08	1.06	0.97	1.12	1.10	1.10
49711.50	1.25	1.18	1.17	1.07	1.24	1.22	1.22	1.13	1.08	1.06	0.97	1.12	1.10	1.10
49710.50	1.25	1.18	1.17	1.07	1.24	1.22	1.22	1.13	1.08	1.06	0.97	1.12	1.10	1.10
49709.50	1.25	1.18	1.17	1.07	1.24	1.22	1.22	1.13	1.07	1.06	0.97	1.12	1.10	1.10
49708.50	1.25	1.18	1.17	1.07	1.24	1.22	1.22	1.13	1.07	1.06	0.97	1.11	1.10	1.10
49707.50	1.25	1.18	1.17	1.07	1.24	1.22	1.22	1.13	1.07	1.06	0.97	1.11	1.10	1.10
49706.50	1.25	1.18	1.17	1.07	1.24	1.22	1.22	1.13	1.07	1.06	0.97	1.11	1.10	1.10
49705.50	1.25	1.18	1.16	1.07	1.24	1.22	1.22	1.13	1.07	1.06	0.97	1.11	1.10	1.09
49704.50	1.25	1.18	1.16	1.07	1.24	1.22	1.22	1.12	1.07	1.05	0.97	1.11	1.10	1.09
49703.50	1.25	1.18	1.16	1.07	1.24	1.22	1.22	1.12	1.07	1.05	0.97	1.11	1.09	1.09
49702.50	1.25	1.18	1.16	1.07	1.24	1.22	1.22	1.12	1.07	1.05	0.97	1.11	1.09	1.09
49701.50	1.25	1.18	1.16	1.07	1.24	1.22	1.22	1.12	1.07	1.05	0.97	1.11	1.09	1.09
49700.50	1.25	1.18	1.16	1.07	1.24	1.22	1.22	1.12	1.07	1.05	0.97	1.11	1.09	1.09
49699.50	1.25	1.18	1.16	1.07	1.24	1.22	1.22	1.12	1.07	1.05	0.97	1.11	1.09	1.09
49698.50	1.24	1.18	1.16	1.07	1.24	1.22	1.22	1.12	1.07	1.05	0.97	1.11	1.09	1.09
49697.50	1.24	1.18	1.16	1.07	1.24	1.22	1.22	1.12	1.07	1.05	0.97	1.11	1.09	1.09
49696.50	1.24	1.18	1.16	1.07	1.24	1.22	1.22	1.12	1.07	1.05	0.97	1.11	1.09	1.09
49695.50	1.24	1.18	1.16	1.07	1.24	1.22	1.22	1.12	1.07	1.05	0.97	1.11	1.09	1.09
49694.50	1.24	1.18	1.16	1.07	1.24	1.22	1.22	1.12	1.07	1.05	0.96	1.11	1.09	1.09
49693.50	1.24	1.18	1.16	1.07	1.24	1.22	1.22	1.12	1.07	1.05	0.96	1.11	1.09	1.09
49692.50	1.24	1.18	1.16	1.07	1.24	1.22	1.22	1.12	1.07	1.05	0.96	1.11	1.09	1.09
49691.50	1.24	1.18	1.16	1.07	1.24	1.22	1.22	1.12	1.06	1.05	0.96	1.11	1.09	1.09
49690.50	1.24	1.18	1.16	1.07	1.24	1.22	1.22	1.12	1.06	1.05	0.96	1.11	1.09	1.09
49689.50	1.24	1.18	1.16	1.07	1.23	1.22	1.22	1.12	1.06	1.05	0.96	1.11	1.09	1.09
49688.50	1.24	1.18	1.16	1.07	1.23	1.22	1.22	1.12	1.06	1.05	0.96	1.10	1.09	1.09
49687.50	1.24	1.18	1.16	1.07	1.23	1.22	1.22	1.12	1.06	1.04	0.96	1.10	1.09	1.09
49686.50	1.24	1.18	1.16	1.07	1.23	1.22	1.22	1.11	1.06	1.04	0.96	1.10	1.09	1.08
49685.50	1.24	1.18	1.16	1.07	1.23	1.22	1.22	1.11	1.06	1.04	0.96	1.10	1.08	1.08
49684.50	1.24	1.18	1.16	1.07	1.23	1.22	1.22	1.11	1.06	1.04	0.96	1.10	1.08	1.08
49683.50	1.24	1.18	1.16	1.07	1.23	1.22	1.22	1.11	1.06	1.04	0.96	1.10	1.08	1.08
49682.50	1.24	1.18	1.16	1.07	1.23	1.22	1.22	1.11	1.06	1.04	0.96	1.10	1.08	1.08
49681.50	1.24	1.18	1.16	1.07	1.23	1.22	1.22	1.11	1.06	1.04	0.96	1.10	1.08	1.08
49680.50	1.24	1.18	1.16	1.07	1.23	1.22	1.22	1.11	1.06	1.04	0.96	1.10	1.08	1.08
49679.50	1.24	1.18	1.16	1.07	1.23	1.22	1.22	1.11	1.06	1.04	0.96	1.10	1.08	1.08
49678.50	1.24	1.18	1.16	1.07	1.23	1.22	1.22	1.11	1.06	1.04	0.95	1.10	1.08	1.08
49677.50	1.24	1.18	1.16	1.07	1.23	1.22	1.22	1.11	1.06	1.04	0.95	1.10	1.08	1.08
49676.50	1.24	1.18	1.16	1.07	1.23	1.22	1.22	1.11	1.05	1.04	0.95	1.10	1.08	1.08
49675.50	1.24	1.18	1.16	1.07	1.23	1.22	1.22	1.11	1.05	1.04	0.95	1.10	1.08	1.08
49674.50	1.24	1.18	1.16	1.07	1.23	1.22	1.22	1.11	1.05	1.04	0.95	1.10	1.08	1.08
49673.50	1.24	1.18	1.16	1.07	1.23	1.22	1.22	1.11	1.05	1.04	0.95	1.09	1.08	1.08
49672.50	1.24	1.18	1.16	1.07	1.23	1.22	1.22	1.11	1.05	1.03	0.95	1.09	1.08	1.08
49671.50	1.24	1.18	1.16	1.07	1.23	1.22	1.22	1.10	1.05	1.03	0.95	1.09	1.08	1.08
49670.50	1.24	1.18	1.16	1.07	1.23	1.22	1.22	1.10	1.05	1.03	0.95	1.09	1.08	1.07
49669.50	1.24	1.18	1.16	1.07	1.23	1.22	1.22	1.10	1.05	1.03	0.95	1.09	1.07	1.07
49668.50	1.24	1.18	1.16	1.07	1.23	1.22	1.22	1.10	1.05	1.03	0.95	1.09	1.07	1.07
49667.50	1.24	1.18	1.16	1.07	1.23	1.22	1.22	1.10	1.05	1.03	0.95	1.09	1.07	1.07
49666.50	1.24	1.18	1.16	1.07	1.23	1.22	1.22	1.10	1.05	1.03	0.95	1.09	1.07	1.07
49665.50	1.24	1.18	1.16	1.06	1.23	1.22	1.22	1.10	1.05	1.03	0.95	1.09	1.07	1.07
49664.50	1.24	1.18	1.16	1.06	1.23	1.22	1.22	1.10	1.05	1.03	0.94	1.09	1.07	1.07
49663.50	1.24	1.18	1.16	1.06	1.23	1.22	1.22	1.10	1.05	1.03	0.94	1.09	1.07	1.07
49662.50	1.24	1.18	1.16	1.06	1.23	1.22	1.22	1.10	1.04	1.03	0.94	1.09	1.07	1.07
49661.50	1.24	1.18	1.16	1.06	1.23	1.22	1.22	1.10	1.04	1.03	0.94	1.09	1.07	1.07
49660.50	1.24	1.18	1.16	1.06	1.23	1.22	1.22	1.10	1.04	1.03	0.94	1.09	1.07	1.07
49659.50	1.24	1.18	1.16	1.06	1.23	1.22	1.22	1.10	1.04	1.03	0.94	1.08	1.07	1.07
49658.50	1.24	1.18	1.16	1.06	1.23	1.22	1.22	1.09	1.04	1.02	0.94	1.08	1.07	1.07
49657.50	1.24	1.18	1.16	1.06	1.23	1.22	1.22	1.09	1.04	1.02	0.94	1.08	1.07	1.06
49656.50	1.24	1.18	1.16	1.06	1.23	1.22	1.22	1.09	1.04	1.02	0.94	1.08	1.06	1.06
49655.50	1.24	1.18	1.16	1.06	1.23	1.22	1.22	1.09	1.04	1.02	0.94	1.08	1.06	1.06
49654.50	1.24	1.18	1.16	1.06	1.23	1.22	1.22	1.09	1.04	1.02	0.94	1.08	1.06	1.06
49653.50	1.24	1.18	1.16	1.06	1.23	1.22	1.22	1.09	1.04	1.02	0.94	1.08	1.06	1.06
49652.50	1.24	1.18	1.16	1.06	1.23	1.22	1.22	1.09	1.04	1.02	0.94	1.08	1.06	1.06
49651.50	1.24	1.18	1.16	1.06	1.23	1.22	1.21	1.09	1.04	1.02	0.93	1.08	1.06	1.06
49650.50	1.24	1.18	1.16	1.06	1.23	1.22	1.21	1.09	1.03	1.02	0.93	1.08	1.06	1.06
49649.50	1.24	1.18	1.16	1.06	1.23	1.22	1.21	1.09	1.03	1.02	0.93	1.08	1.06	1.06
49648.50	1.24	1.18	1.16	1.06	1.23	1.22	1.21	1.09	1.03	1.02	0.93	1.08	1.06	1.06
49647.50	1.24	1.18	1.16	1.06	1.23	1.22	1.21	1.09	1.03	1.02	0.93	1.08	1.06	1.06
49646.50	1.24	1.18	1.16	1.06	1.23	1.22	1.21	1.08	1.03	1.01	0.93	1.07	1.06	1.06
49645.50	1.24	1.18	1.16	1.06	1.23	1.22	1.21	1.08	1.03	1.01	0.93	1.07	1.06	1.06
49644.50	1.24	1.18	1.16	1.06	1.23	1.21	1.21	1.08	1.03	1.01	0.93	1.07	1.05	1.05
49643.50	1.24	1.18	1.16	1.06	1.23	1.21	1.21	1.08	1.03	1.01	0.93	1.07	1.05	1.05
49642.50	1.24	1.18	1.16	1.06	1.23	1.21	1.21	1.08	1.03	1.01	0.93	1.07	1.05	1.05
49641.50	1.24	1.18	1.16	1.06	1.23	1.21	1.21	1.08	1.03	1.01	0.93	1.07	1.05	1.05
49640.50	1.24	1.18	1.16	1.06	1.23	1.21	1.21	1.08	1.03	1.01	0.93	1.07	1.05	1.05
49639.50	1.24	1.18	1.16	1.06	1.23	1.21	1.21	1.08	1.03	1.01	0.93	1.07	1.05	1.05
49638.50	1.24	1.18	1.16	1.06	1.23	1.21	1.21	1.08	1.02	1.01	0.92	1.07	1.05	1.05
49637.50	1.24	1.18	1.16	1.06	1.23	1.21	1.21	1.08	1.02	1.01	0.92	1.07	1.05	1.05
49636.50	1.24	1.18	1.16	1.06	1.23	1.21	1.21	1.08	1.02	1.01	0.92	1.07	1.05	1.05
49635.50	1.24	1.18	1.16	1.06	1.23	1.21	1.21	1.07	1.02	1.01	0.92	1.06	1.05	1.05
49634.50	1.24	1.18	1.16	1.06	1.23	1.21	1.21	1.07	1.02	1.00	0.92	1.06	1.05	1.05
49633.50	1.24	1.18	1.16	1.06	1.23	1.21	1.21	1.07	1.02	1.00	0.92	1.06	1.05	1.04
49632.50	1.24	1.18	1.16	1.06	1.23	1.21	1.21	1.07	1.02	1.00	0.92	1.06	1.04	1.04
49631.50	1.24	1.18	1.16	1.06	1.23	1.21	1.21	1.07	1.02	1.00	0.92	1.06	1.04	1.04
49630.50	1.24	1.18	1.16	1.06	1.23	1.21	1.21	1.07	1.02	1.00	0.92	1.06	1.04	1.04
49629.50	1.24	1.18	1.16	1.06	1.23	1.21	1.21	1.07	1.02	1.00	0.92	1.06	1.04	1.04
49628.50	1.24	1.18	1.16	1.06	1.23	1.21	1.21	1.07	1.02	1.00	0.92	1.06	1.04	1.04
49627.50	1.24	1.18	1.16	1.06	1.23	1.21	1.21	1.07	1.01	1.00	0.91	1.06	1.04	1.04
49626.50	1.24	1.18	1.16	1.06	1.23	1.21	1.21	1.07	1.01	1.00	0.91	1.06	1.04	1.04
49625.50	1.24	1.18	1.16	1.06	1.23	1.21	1.21	1.06	1.01	1.00	0.91	1.06	1.04	1.04
49624.50	1.24	1.18	1.16	1.06	1.23	1.21	1.21	1.06	1.01	1.00	0.91	1.05	1.04	1.04
49623.50	1.24	1.18	1.16	1.06	1.23	1.21	1.21	1.06	1.01	0.99	0.91	1.05	1.04	1.04
49622.50	1.24	1.18	1.16	1.06	1.23	1.21	1.21	1.06	1.01	0.99	0.91	1.05	1.04	1.03
49621.50	1.24	1.18	1.16	1.06	1.23	1.21	1.21	1.06	1.01	0.99	0.91	1.05	1.03	1.03
49620.50	1.24	1.18	1.16	1.06	1.23	1.21	1.21	1.06	1.01	0.99	0.91	1.05	1.03	1.03
49619.50	1.24	1.18	1.16	1.06	1.23	1.21	1.21	1.06	1.01	0.99	0.91	1.05	1.03	1.03
49618.50	1.24	1.18	1.16	1.06	1.23	1.21	1.21	1.06	1.01	0.99	0.91	1.05	1.03	1.03
49617.50	1.24	1.18	1.16	1.06	1.23	1.21	1.21	1.06	1.00	0.99	0.91	1.05	1.03	1.03
49616.50	1.24	1.18	1.16	1.06	1.23	1.21	1.21	1.05	1.00	0.99	0.90	1.05	1.03	1.03
49615.50	1.24	1.17	1.16	1.06	1.23	1.21	1.21	1.05	1.00	0.99	0.90	1.05	1.03	1.03
49614.50	1.24	1.17	1.16	1.06	1.23	1.21	1.21	1.05	1.00	0.99	0.90	1.04	1.03	1.03
49613.50	1.24	1.17	1.16	1.06	1.23	1.21	1.21	1.05	1.00	0.98	0.90	1.04	1.03	1.03
49612.50	1.24	1.17	1.16	1.06	1.23	1.21	1.21	1.05	1.00	0.98	0.90	1.04	1.03	1.02
49611.50	1.24	1.17	1.16	1.06	1.23	1.21	1.21	1.05	1.00	0.98	0.90	1.04	1.02	1.02
49610.50	1.24	1.17	1.16	1.06	1.23	1.21	1.21	1.05	1.00	0.98	0.90	1.04	1.02	1.02
49609.50	1.24	1.17	1.16	1.06	1.23	1.21	1.21	1.05	1.00	0.98	0.90	1.04	1.02	1.02
49608.50	1.24	1.17	1.16	1.06	1.23	1.21	1.21	1.05	1.00	0.98	0.90	1.04	1.02	1.02
49607.50	1.24	1.17	1.16	1.06	1.23	1.21	1.21	1.05	0.99	0.98	0.90	1.04	1.02	1.02
49606.50	1.24	1.17	1.16	1.06	1.23	1.21	1.21	1.04	0.99	0.98	0.90	1.04	1.02	1.02
49605.50	1.24	1.17	1.16	1.06	1.23	1.21	1.21	1.04	0.99	0.98	0.89	1.04	1.02	1.02
49604.50	1.23	1.17	1.16	1.06	1.23	1.21	1.21	1.04	0.99	0.98	0.89	1.03	1.02	1.02
49603.50	1.23	1.17	1.16	1.06	1.23	1.21	1.21	1.04	0.99	0.97	0.89	1.03	1.02	1.02
49602.50	1.23	1.17	1.16	1.06	1.23	1.21	1.21	1.04	0.99	0.97	0.89	1.03	1.02	1.01
49601.50	1.23	1.17	1.16	1.06	1.23	1.21	1.21	1.04	0.99	0.97	0.89	1.03	1.01	1.01
49600.50	1.23	1.17	1.16	1.06	1.23	1.21	1.21	1.04	0.99	0.97	0.89	1.03	1.01	1.01
49599.50	1.23	1.17	1.16	1.06	1.23	1.21	1.21	1.04	0.99	0.97	0.89	1.03	1.01	1.01
49598.50	1.23	1.17	1.16	1.06	1.23	1.21	1.21	1.04	0.98	0.97	0.89	1.03	1.01	1.01
49597.50	1.23	1.17	1.16	1.06	1.23	1.21	1.21	1.03	0.98	0.97	0.89	1.03	1.01	1.01
49596.50	1.23	1.17	1.16	1.06	1.23	1.21	1.21	1.03	0.98	0.97	0.89	1.03	1.01	1.01
49595.50	1.23	1.17	1.16	1.06	1.23	1.21	1.21	1.03	0.98	0.97	0.88	1.02	1.01	1.01
49594.50	1.23	1.17	1.16	1.06	1.23	1.21	1.21	1.03	0.98	0.97	0.88	1.02	1.01	1.01
49593.50	1.23	1.17	1.16	1.06	1.23	1.21	1.21	1.03	0.98	0.96	0.88	1.02	1.01	1.00
49592.50	1.23	1.17	1.16	1.06	1.23	1.21	1.21	1.03	0.98	0.96	0.88	1.02	1.00	1.00
49591.50	1.23	1.17	1.16	1.06	1.22	1.21	1.21	1.03	0.98	0.96	0.88	1.02	1.00	1.00
49590.50	1.23	1.17	1.15	1.06	1.22	1.21	1.21	1.03	0.98	0.96	0.88	1.02	1.00	1.00
49589.50	1.23	1.17	1.15	1.06	1.22	1.21	1.21	1.02	0.98	0.96	0.88	1.02	1.00	1.00
49588.50	1.23	1.17	1.15	1.06	1.22	1.21	1.21	1.02	0.97	0.96	0.88	1.02	1.00	1.00
49587.50	1.23	1.17	1.15	1.06	1.22	1.21	1.21	1.02	0.97	0.96	0.88	1.02	1.00	1.00
49586.50	1.23	1.17	1.15	1.06	1.22	1.21	1.21	1.02	0.97	0.96	0.88	1.01	1.00	1.00
49585.50	1.23	1.17	1.15	1.06	1.22	1.21	1.21	1.02	0.97	0.96	0.87	1.01	1.00	1.00
49584.50	1.23	1.17	1.15	1.06	1.22	1.21	1.21	1.02	0.97	0.95	0.87	1.01	1.00	0.99
49583.50	1.23	1.17	1.15	1.06	1.22	1.21	1.21	1.02	0.97	0.95	0.87	1.01	0.99	0.99
49582.50	1.23	1.17	1.15	1.06	1.22	1.21	1.21	1.02	0.97	0.95	0.87	1.01	0.99	0.99
49581.50	1.23	1.17	1.15	1.06	1.22	1.21	1.21	1.01	0.97	0.95	0.87	1.01	0.99	0.99
49580.50	1.23	1.17	1.15	1.06	1.22	1.21	1.21	1.01	0.97	0.95	0.87	1.01	0.99	0.99
49579.50	1.23	1.17	1.15	1.06	1.22	1.21	1.21	1.01	0.96	0.95	0.87	1.01	0.99	0.99
49578.50	1.23	1.17	1.15	1.06	1.22	1.21	1.21	1.01	0.96	0.95	0.87	1.00	0.99	0.99
49577.50	1.23	1.17	1.15	1.06	1.22	1.21	1.21	1.01	0.96	0.95	0.87	1.00	0.99	0.99
49576.50	1.23	1.17	1.15	1.06	1.22	1.21	1.21	1.01	0.96	0.95	0.86	1.00	0.99	0.99
49575.50	1.23	1.17	1.15	1.06	1.22	1.21	1.21	1.01	0.96	0.94	0.86	1.00	0.99	0.98
49574.50	1.23	1.17	1.15	1.06	1.22	1.21	1.21	1.01	0.96	0.94	0.86	1.00	0.98	0.98
49573.50	1.23	1.17	1.15	1.06	1.22	1.21	1.21	1.00	0.96	0.94	0.86	1.00	0.98	0.98
49572.50	1.23	1.17	1.15	1.06	1.22	1.21	1.21	1.00	0.96	0.94	0.86	1.00	0.98	0.98
49571.50	1.23	1.17	1.15	1.06	1.22	1.21	1.21	1.00	0.95	0.94	0.86	1.00	0.98	0.98
49570.50	1.23	1.17	1.15	1.06	1.22	1.21	1.21	1.00	0.95	0.94	0.86	0.99	0.98	0.98
49569.50	1.23	1.17	1.15	1.06	1.22	1.21	1.21	1.00	0.95	0.94	0.86	0.99	0.98	0.98
49568.50	1.23	1.17	1.15	1.06	1.22	1.21	1.21	1.00	0.95	0.94	0.86	0.99	0.98	0.98
49567.50	1.23	1.17	1.15	1.06	1.22	1.21	1.21	1.00	0.95	0.94	0.86	0.99	0.98	0.98
49566.50	1.23	1.17	1.15	1.06	1.22	1.21	1.21	1.00	0.95	0.93	0.85	0.99	0.97	0.97
49565.50	1.23	1.17	1.15	1.06	1.22	1.21	1.21	0.99	0.95	0.93	0.85	0.99	0.97	0.97
49564.50	1.23	1.17	1.15	1.06	1.22	1.21	1.21	0.99	0.95	0.93	0.85	0.99	0.97	0.97
49563.50	1.23	1.17	1.15	1.06	1.22	1.21	1.21	0.99	0.95	0.93	0.85	0.99	0.97	0.97
49562.50	1.23	1.17	1.15	1.06	1.22	1.21	1.21	0.99	0.94	0.93	0.85	0.98	0.97	0.97
49561.50	1.23	1.17	1.15	1.06	1.22	1.21	1.21	0.99	0.94	0.93	0.85	0.98	0.97	0.97
49560.50	1.23	1.17	1.15	1.06	1.22	1.21	1.21	0.99	0.94	0.93	0.85	0.98	0.97	0.97
49559.50	1.23	1.17	1.15	1.06	1.22	1.21	1.21	0.99	0.94	0.93	0.85	0.98	0.97	0.97
49558.50	1.23	1.17	1.15	1.06	1.22	1.21	1.21	0.99	0.94	0.92	0.85	0.98	0.97	0.96
49557.50	1.23	1.17	1.15	1.06	1.22	1.21	1.21	0.98	0.94	0.92	0.84	0.98	0.96	0.96
49556.50	1.23	1.17	1.15	1.06	1.22	1.21	1.21	0.98	0.94	0.92	0.84	0.98	0.96	0.96
49555.50	1.23	1.17	1.15	1.06	1.22	1.21	1.21	0.98	0.94	0.92	0.84	0.98	0.96	0.96
49554.50	1.23	1.17	1.15	1.06	1.22	1.21	1.21	0.98	0.93	0.92	0.84	0.97	0.96	0.96
49553.50	1.23	1.17	1.15	1.06	1.22	1.21	1.21	0.98	0.93	0.92	0.84	0.97	0.96	0.96
49552.50	1.23	1.17	1.15	1.06	1.22	1.21	1.20	0.98	0.93	0.92	0.84	0.97	0.96	0.96
49551.50	1.23	1.17	1.15	1.06	1.22	1.21	1.20	0.98	0.93	0.92	0.84	0.97	0.96	0.96
49550.50	1.23	1.17	1.15	1.06	1.22	1.21	1.20	0.97	0.93	0.92	0.84	0.97	0.96	0.95
49549.50	1.23	1.17	1.15	1.06	1.22	1.21	1.20	0.97	0.93	0.91	0.83	0.97	0.95	0.95
49548.50	1.23	1.17	1.15	1.06	1.22	1.21	1.20	0.97	0.93	0.91	0.83	0.97	0.95	0.95
49547.50	1.23	1.17	1.15	1.06	1.22	1.21	1.20	0.97	0.93	0.91	0.83	0.97	0.95	0.95
49546.50	1.23	1.17	1.15	1.06	1.22	1.21	1.20	0.97	0.92	0.91	0.83	0.96	0.95	0.95
49545.50	1.23	1.17	1.15	1.06	1.22	1.21	1.20	0.97	0.92	0.91	0.83	0.96	0.95	0.95
49544.50	1.23	1.17	1.15	1.06	1.22	1.21	1.20	0.97	0.92	0.91	0.83	0.96	0.95	0.95
49543.50	1.23	1.17	1.15	1.06	1.22	1.20	1.20	0.96	0.92	0.91	0.83	0.96	0.95	0.95
49542.50	1.23	1.17	1.15	1.06	1.22	1.20	1.20	0.96	0.92	0.91	0.83	0.96	0.95	0.94
49541.50	1.23	1.17	1.15	1.06	1.22	1.20	1.20	0.96	0.92	0.90	0.83	0.96	0.94	0.94
49540.50	1.23	1.17	1.15	1.06	1.22	1.20	1.20	0.96	0.92	0.90	0.82	0.96	0.94	0.94
49539.50	1.23	1.17	1.15	1.06	1.22	1.20	1.20	0.96	0.92	0.90	0.82	0.95	0.94	0.94
49538.50	1.23	1.17	1.15	1.06	1.22	1.20	1.20	0.96	0.91	0.90	0.82	0.95	0.94	0.94
49537.50	1.23	1.17	1.15	1.06	1.22	1.20	1.20	0.96	0.91	0.90	0.82	0.95	0.94	0.94
49536.50	1.23	1.17	1.15	1.06	1.22	1.20	1.20	0.95	0.91	0.90	0.82	0.95	0.94	0.94
49535.50	1.23	1.17	1.15	1.06	1.22	1.20	1.20	0.95	0.91	0.90	0.82	0.95	0.94	0.94
49534.50	1.23	1.17	1.15	1.06	1.22	1.20	1.20	0.95	0.91	0.90	0.82	0.95	0.94	0.93
49533.50	1.23	1.17	1.15	1.06	1.22	1.20	1.20	0.95	0.91	0.89	0.82	0.95	0.93	0.93
49532.50	1.23	1.17	1.15	1.06	1.22	1.20	1.20	0.95	0.91	0.89	0.82	0.95	0.93	0.93
49531.50	1.23	1.17	1.15	1.05	1.22	1.20	1.20	0.95	0.91	0.89	0.81	0.94	0.93	0.93
49530.50	1.23	1.17	1.15	1.05	1.22	1.20	1.20	0.95	0.90	0.89	0.81	0.94	0.93	0.93
49529.50	1.23	1.17	1.15	1.05	1.22	1.20	1.20	0.95	0.90	0.89	0.81	0.94	0.93	0.93
49528.50	1.23	1.17	1.15	1.05	1.22	1.20	1.20	0.94	0.90	0.89	0.81	0.94	0.93	0.93
49527.50	1.23	1.17	1.15	1.05	1.22	1.20	1.20	0.94	0.90	0.89	0.81	0.94	0.93	0.92
49526.50	1.23	1.17	1.15	1.05	1.22	1.20	1.20	0.94	0.90	0.89	0.81	0.94	0.92	0.92
49525.50	1.23	1.17	1.15	1.05	1.22	1.20	1.20	0.94	0.90	0.88	0.81	0.94	0.92	0.92
49524.50	1.23	1.17	1.15	1.05	1.22	1.20	1.20	0.94	0.90	0.88	0.81	0.93	0.92	0.92
49523.50	1.23	1.17	1.15	1.05	1.22	1.20	1.20	0.94	0.90	0.88	0.80	0.93	0.92	0.92
49522.50	1.23	1.17	1.15	1.05	1.22	1.20	1.20	0.93	0.89	0.88	0.80	0.93	0.92	0.92
49521.50	1.23	1.17	1.15	1.05	1.22	1.20	1.20	0.93	0.89	0.88	0.80	0.93	0.92	0.92
49520.50	1.23	1.17	1.15	1.05	1.22	1.20	1.20	0.93	0.89	0.88	0.80	0.93	0.92	0.92
49519.50	1.23	1.17	1.15	1.05	1.22	1.20	1.20	0.93	0.89	0.88	0.80	0.93	0.92	0.91
49518.50	1.23	1.17	1.15	1.05	1.22	1.20	1.20	0.93	0.89	0.88	0.80	0.93	0.91	0.91
49517.50	1.23	1.17	1.15	1.05	1.22	1.20	1.20	0.93	0.89	0.87	0.80	0.92	0.91	0.91
49516.50	1.23	1.17	1.15	1.05	1.22	1.20	1.20	0.93	0.89	0.87	0.80	0.92	0.91	0.91
49515.50	1.23	1.17	1.15	1.05	1.22	1.20	1.20	0.92	0.89	0.87	0.80	0.92	0.91	0.91
49514.50	1.23	1.17	1.15	1.05	1.22	1.20	1.20	0.92	0.88	0.87	0.79	0.92	0.91	0.91
49513.50	1.22	1.17	1.15	1.05	1.22	1.20	1.20	0.92	0.88	0.87	0.79	0.92	0.91	0.91
49512.50	1.22	1.17	1.15	1.05	1.22	1.20	1.20	0.92	0.88	0.87	0.79	0.92	0.91	0.90
49511.50	1.22	1.17	1.15	1.05	1.22	1.20	1.20	0.92	0.88	0.87	0.79	0.92	0.90	0.90
49510.50	1.22	1.17	1.15	1.05	1.22	1.20	1.20	0.92	0.88	0.87	0.79	0.91	0.90	0.90
49509.50	1.22	1.17	1.15	1.05	1.22	1.20	1.20	0.92	0.88	0.86	0.79	0.91	0.90	0.90
49508.50	1.22	1.16	1.15	1.05	1.22	1.20	1.20	0.91	0.88	0.86	0.79	0.91	0.90	0.90
49507.50	1.22	1.16	1.15	1.05	1.22	1.20	1.20	0.91	0.87	0.86	0.79	0.91	0.90	0.90
49506.50	1.22	1.16	1.15	1.05	1.22	1.20	1.20	0.91	0.87	0.86	0.78	0.91	0.90	0.90
49505.50	1.22	1.16	1.15	1.05	1.22	1.20	1.20	0.91	0.87	0.86	0.78	0.91	0.90	0.90
49504.50	1.22	1.16	1.15	1.05	1.22	1.20	1.20	0.91	0.87	0.86	0.78	0.91	0.90	0.89
49503.50	1.22	1.16	1.15	1.05	1.22	1.20	1.20	0.91	0.87	0.86	0.78	0.90	0.89	0.89
49502.50	1.22	1.16	1.15	1.05	1.22	1.20	1.20	0.91	0.87	0.86	0.78	0.90	0.89	0.89
49501.50	1.22	1.16	1.15	1.05	1.22	1.20	1.20	0.90	0.87	0.85	0.78	0.90	0.89	0.89
49500.50	1.22	1.16	1.15	1.05	1.22	1.20	1.20	0.90	0.87	0.85	0.78	0.90	0.89	0.89
49499.50	1.22	1.16	1.15	1.05	1.22	1.20	1.20	0.90	0.86	0.85	0.78	0.90	0.89	0.89
49498.50	1.22	1.16	1.15	1.05	1.22	1.20	1.20	0.90	0.86	0.85	0.78	0.90	0.89	0.89
49497.50	1.22	1.16	1.15	1.05	1.22	1.20	1.20	0.90	0.86	0.85	0.77	0.90	0.89	0.88
49496.50	1.22	1.16	1.15	1.05	1.21	1.20	1.20	0.90	0.86	0.85	0.77	0.89	0.88	0.88
49495.50	1.22	1.16	1.15	1.05	1.21	1.20	1.20	0.90	0.86	0.85	0.77	0.89	0.88	0.88
49494.50	1.22	1.16	1.15	1.05	1.21	1.20	1.20	0.89	0.86	0.85	0.77	0.89	0.88	0.88
49493.50	1.22	1.16	1.15	1.05	1.21	1.20	1.20	0.89	0.86	0.84	0.77	0.89	0.88	0.88
49492.50	1.22	1.16	1.15	1.05	1.21	1.20	1.20	0.89	0.86	0.84	0.77	0.89	0.88	0.88
49491.50	1.22	1.16	1.15	1.05	1.21	1.20	1.20	0.89	0.85	0.84	0.77	0.89	0.88	0.88
49490.50	1.22	1.16	1.15	1.05	1.21	1.20	1.20	0.89	0.85	0.84	0.77	0.89	0.88	0.87
49489.50	1.22	1.16	1.15	1.05	1.21	1.20	1.20	0.89	0.85	0.84	0.76	0.88	0.88	0.87
49488.50	1.22	1.16	1.15	1.05	1.21	1.20	1.20	0.88	0.85	0.84	0.76	0.88	0.87	0.87
49487.50	1.22	1.16	1.15	1.05	1.21	1.20	1.20	0.88	0.85	0.84	0.76	0.88	0.87	0.87
49486.50	1.22	1.16	1.15	1.05	1.21	1.20	1.20	0.88	0.85	0.84	0.76	0.88	0.87	0.87
49485.50	1.22	1.16	1.15	1.05	1.21	1.20	1.20	0.88	0.85	0.83	0.76	0.88	0.87	0.87
49484.50	1.22	1.16	1.15	1.05	1.21	1.20	1.20	0.88	0.84	0.83	0.76	0.88	0.87	0.87
49483.50	1.22	1.16	1.15	1.05	1.21	1.20	1.20	0.88	0.84	0.83	0.76	0.88	0.87	0.87
49482.50	1.22	1.16	1.15	1.05	1.21	1.20	1.20	0.88	0.84	0.83	0.76	0.87	0.87	0.86
49481.50	1.22	1.16	1.15	1.05	1.21	1.20	1.20	0.87	0.84	0.83	0.75	0.87	0.86	0.86
49480.50	1.22	1.16	1.15	1.05	1.21	1.20	1.20	0.87	0.84	0.83	0.75	0.87	0.86	0.86
49479.50	1.22	1.16	1.14	1.05	1.21	1.20	1.20	0.87	0.84	0.83	0.75	0.87	0.86	0.86
49478.50	1.22	1.16	1.14	1.05	1.21	1.20	1.20	0.87	0.84	0.83	0.75	0.87	0.86	0.86
49477.50	1.22	1.16	1.14	1.05	1.21	1.20	1.20	0.87	0.84	0.82	0.75	0.87	0.86	0.86
49476.50	1.22	1.16	1.14	1.05	1.21	1.20	1.20	0.87	0.83	0.82	0.75	0.87	0.86	0.86
49475.50	1.22	1.16	1.14	1.05	1.21	1.20	1.20	0.87	0.83	0.82	0.75	0.86	0.86	0.85
49474.50	1.22	1.16	1.14	1.05	1.21	1.20	1.20	0.86	0.83	0.82	0.75	0.86	0.85	0.85
49473.50	1.22	1.16	1.14	1.05	1.21	1.20	1.20	0.86	0.83	0.82	0.75	0.86	0.85	0.85
49472.50	1.22	1.16	1.14	1.05	1.21	1.20	1.20	0.86	0.83	0.82	0.74	0.86	0.85	0.85
49471.50	1.22	1.16	1.14	1.05	1.21	1.20	1.20	0.86	0.83	0.82	0.74	0.86	0.85	0.85
49470.50	1.22	1.16	1.14	1.05	1.21	1.20	1.20	0.86	0.83	0.82	0.74	0.86	0.85	0.85
49469.50	1.22	1.16	1.14	1.05	1.21	1.20	1.20	0.86	0.82	0.81	0.74	0.86	0.85	0.85
49468.50	1.22	1.16	1.14	1.05	1.21	1.20	1.20	0.85	0.82	0.81	0.74	0.85	0.85	0.84
49467.50	1.22	1.16	1.14	1.05	1.21	1.20	1.20	0.85	0.82	0.81	0.74	0.85	0.85	0.84
49466.50	1.22	1.16	1.14	1.05	1.21	1.20	1.20	0.85	0.82	0.81	0.74	0.85	0.84	0.84
49465.50	1.22	1.16	1.14	1.05	1.21	1.20	1.20	0.85	0.82	0.81	0.74	0.85	0.84	0.84
49464.50	1.22	1.16	1.14	1.05	1.21	1.20	1.20	0.85	0.82	0.81	0.73	0.85	0.84	0.84
49463.50	1.22	1.16	1.14	1.05	1.21	1.20	1.20	0.85	0.82	0.81	0.73	0.85	0.84	0.84
49462.50	1.22	1.16	1.14	1.05	1.21	1.20	1.20	0.85	0.82	0.80	0.73	0.85	0.84	0.84
49461.50	1.22	1.16	1.14	1.05	1.21	1.20	1.20	0.84	0.81	0.80	0.73	0.84	0.84	0.83
49460.50	1.22	1.16	1.14	1.05	1.21	1.20	1.20	0.84	0.81	0.80	0.73	0.84	0.84	0.83
49459.50	1.22	1.16	1.14	1.05	1.21	1.20	1.20	0.84	0.81	0.80	0.73	0.84	0.83	0.83
49458.50	1.22	1.16	1.14	1.05	1.21	1.20	1.20	0.84	0.81	0.80	0.73	0.84	0.83	0.83
49457.50	1.22	1.16	1.14	1.05	1.21	1.20	1.19	0.84	0.81	0.80	0.73	0.84	0.83	0.83
49456.50	1.22	1.16	1.14	1.05	1.21	1.20	1.19	0.84	0.81	0.80	0.73	0.84	0.83	0.83
49455.50	1.22	1.16	1.14	1.05	1.21	1.20	1.19	0.83	0.81	0.80	0.72	0.84	0.83	0.83
49454.50	1.22	1.16	1.14	1.05	1.21	1.20	1.19	0.83	0.81	0.79	0.72	0.83	0.83	0.83
49453.50	1.22	1.16	1.14	1.05	1.21	1.20	1.19	0.83	0.80	0.79	0.72	0.83	0.83	0.82
49452.50	1.22	1.16	1.14	1.05	1.21	1.20	1.19	0.83	0.80	0.79	0.72	0.83	0.82	0.82
49451.50	1.22	1.16	1.14	1.05	1.21	1.20	1.19	0.83	0.80	0.79	0.72	0.83	0.82	0.82
49450.50	1.22	1.16	1.14	1.05	1.21	1.20	1.19	0.83	0.80	0.79	0.72	0.83	0.82	0.82
49449.50	1.22	1.16	1.14	1.05	1.21	1.20	1.19	0.83	0.80	0.79	0.72	0.83	0.82	0.82
49448.50	1.22	1.16	1.14	1.05	1.21	1.20	1.19	0.82	0.80	0.79	0.72	0.83	0.82	0.82
49447.50	1.22	1.16	1.14	1.05	1.21	1.20	1.19	0.82	0.80	0.79	0.71	0.82	0.82	0.82
49446.50	1.22	1.16	1.14	1.05	1.21	1.20	1.19	0.82	0.79	0.78	0.71	0.82	0.82	0.81
49445.50	1.22	1.16	1.14	1.05	1.21	1.20	1.19	0.82	0.79	0.78	0.71	0.82	0.82	0.81
49444.50	1.22	1.16	1.14	1.05	1.21	1.20	1.19	0.82	0.79	0.78	0.71	0.82	0.81	0.81
49443.50	1.22	1.16	1.14	1.05	1.21	1.19	1.19	0.82	0.79	0.78	0.71	0.82	0.81	0.81
49442.50	1.22	1.16	1.14	1.05	1.21	1.19	1.19	0.82	0.79	0.78	0.71	0.82	0.81	0.81
49441.50	1.22	1.16	1.14	1.05	1.21	1.19	1.19	0.81	0.79	0.78	0.71	0.82	0.81	0.81
49440.50	1.22	1.16	1.14	1.05	1.21	1.19	1.19	0.81	0.79	0.78	0.71	0.81	0.81	0.81
49439.50	1.22	1.16	1.14	1.05	1.21	1.19	1.19	0.81	0.79	0.78	0.71	0.81	0.81	0.80
49438.50	1.22	1.16	1.14	1.05	1.21	1.19	1.19	0.81	0.78	0.77	0.70	0.81	0.81	0.80
49437.50	1.22	1.16	1.14	1.05	1.21	1.19	1.19	0.81	0.78	0.77	0.70	0.81	0.80	0.80
49436.50	1.22	1.16	1.14	1.05	1.21	1.19	1.19	0.81	0.78	0.77	0.70	0.81	0.80	0.80
49435.50	1.22	1.16	1.14	1.05	1.21	1.19	1.19	0.80	0.78	0.77	0.70	0.81	0.80	0.80
49434.50	1.22	1.16	1.14	1.05	1.21	1.19	1.19	0.80	0.78	0.77	0.70	0.81	0.80	0.80
49433.50	1.22	1.16	1.14	1.05	1.21	1.19	1.19	0.80	0.78	0.77	0.70	0.80	0.80	0.80
49432.50	1.22	1.16	1.14	1.05	1.21	1.19	1.19	0.80	0.78	0.77	0.70	0.80	0.80	0.80
49431.50	1.22	1.16	1.14	1.05	1.21	1.19	1.19	0.80	0.78	0.77	0.70	0.80	0.80	0.79
49430.50	1.22	1.16	1.14	1.05	1.21	1.19	1.19	0.80	0.77	0.76	0.70	0.80	0.80	0.79
49429.50	1.22	1.16	1.14	1.05	1.21	1.19	1.19	0.80	0.77	0.76	0.69	0.80	0.79	0.79
49428.50	1.22	1.16	1.14	1.05	1.21	1.19	1.19	0.79	0.77	0.76	0.69	0.80	0.79	0.79
49427.50	1.22	1.16	1.14	1.05	1.21	1.19	1.19	0.79	0.77	0.76	0.69	0.80	0.79	0.79
49426.50	1.22	1.16	1.14	1.05	1.21	1.19	1.19	0.79	0.77	0.76	0.69	0.79	0.79	0.79
49425.50	1.21	1.16	1.14	1.05	1.21	1.19	1.19	0.79	0.77	0.76	0.69	0.79	0.79	0.79
49424.50	1.21	1.16	1.14	1.05	1.21	1.19	1.19	0.79	0.77	0.76	0.69	0.79	0.79	0.78
49423.50	1.21	1.16	1.14	1.05	1.21	1.19	1.19	0.79	0.77	0.76	0.69	0.79	0.79	0.78
49422.50	1.21	1.16	1.14	1.05	1.21	1.19	1.19	0.79	0.76	0.76	0.69	0.79	0.79	0.78
49421.50	1.21	1.16	1.14	1.05	1.21	1.19	1.19	0.78	0.76	0.75	0.68	0.79	0.78	0.78
49420.50	1.21	1.16	1.14	1.05	1.21	1.19	1.19	0.78	0.76	0.75	0.68	0.79	0.78	0.78
49419.50	1.21	1.16	1.14	1.05	1.21	1.19	1.19	0.78	0.76	0.75	0.68	0.78	0.78	0.78
49418.50	1.21	1.16	1.14	1.05	1.21	1.19	1.19	0.78	0.76	0.75	0.68	0.78	0.78	0.78
49417.50	1.21	1.16	1.14	1.05	1.21	1.19	1.19	0.78	0.76	0.75	0.68	0.78	0.78	0.78
49416.50	1.21	1.16	1.14	1.05	1.21	1.19	1.19	0.78	0.76	0.75	0.68	0.78	0.78	0.77
49415.50	1.21	1.16	1.14	1.05	1.21	1.19	1.19	0.78	0.76	0.75	0.68	0.78	0.78	0.77
49414.50	1.21	1.16	1.14	1.05	1.21	1.19	1.19	0.77	0.75	0.75	0.68	0.78	0.77	0.77
49413.50	1.21	1.16	1.14	1.05	1.21	1.19	1.19	0.77	0.75	0.74	0.68	0.78	0.77	0.77
49412.50	1.21	1.16	1.14	1.05	1.21	1.19	1.19	0.77	0.75	0.74	0.68	0.77	0.77	0.77
49411.50	1.21	1.16	1.14	1.05	1.21	1.19	1.19	0.77	0.75	0.74	0.67	0.77	0.77	0.77
49410.50	1.21	1.16	1.14	1.05	1.21	1.19	1.19	0.77	0.75	0.74	0.67	0.77	0.77	0.77
49409.50	1.21	1.16	1.14	1.05	1.21	1.19	1.19	0.77	0.75	0.74	0.67	0.77	0.77	0.76
49408.50	1.21	1.16	1.14	1.05	1.21	1.19	1.19	0.77	0.75	0.74	0.67	0.77	0.77	0.76
49407.50	1.21	1.16	1.14	1.05	1.21	1.19	1.19	0.76	0.75	0.74	0.67	0.77	0.77	0.76
49406.50	1.21	1.16	1.14	1.05	1.21	1.19	1.19	0.76	0.74	0.74	0.67	0.77	0.76	0.76
49405.50	1.21	1.16	1.14	1.05	1.21	1.19	1.19	0.76	0.74	0.74	0.67	0.76	0.76	0.76
49404.50	1.21	1.16	1.14	1.05	1.20	1.19	1.19	0.76	0.74	0.73	0.67	0.76	0.76	0.76
49403.50	1.21	1.15	1.14	1.04	1.20	1.19	1.19	0.76	0.74	0.73	0.67	0.76	0.76	0.76
49402.50	1.21	1.15	1.14	1.04	1.20	1.19	1.19	0.76	0.74	0.73	0.66	0.76	0.76	0.76
49401.50	1.21	1.15	1.14	1.04	1.20	1.19	1.19	0.76	0.74	0.73	0.66	0.76	0.76	0.75
49400.50	1.21	1.15	1.14	1.04	1.20	1.19	1.19	0.75	0.74	0.73	0.66	0.76	0.76	0.75
49399.50	1.21	1.15	1.14	1.04	1.20	1.19	1.19	0.75	0.74	0.73	0.66	0.76	0.76	0.75
49398.50	1.21	1.15	1.14	1.04	1.20	1.19	1.19	0.75	0.74	0.73	0.66	0.75	0.75	0.75
49397.50	1.21	1.15	1.14	1.04	1.20	1.19	1.19	0.75	0.73	0.73	0.66	0.75	0.75	0.75
49396.50	1.21	1.15	1.14	1.04	1.20	1.19	1.19	0.75	0.73	0.72	0.66	0.75	0.75	0.75
49395.50	1.21	1.15	1.14	1.04	1.20	1.19	1.19	0.75	0.73	0.72	0.66	0.75	0.75	0.75
49394.50	1.21	1.15	1.14	1.04	1.20	1.19	1.19	0.75	0.73	0.72	0.66	0.75	0.75	0.75
49393.50	1.21	1.15	1.14	1.04	1.20	1.19	1.19	0.74	0.73	0.72	0.65	0.75	0.75	0.74
49392.50	1.21	1.15	1.14	1.04	1.20	1.19	1.19	0.74	0.73	0.72	0.65	0.75	0.75	0.74
49391.50	1.21	1.15	1.14	1.04	1.20	1.19	1.19	0.74	0.73	0.72	0.65	0.75	0.75	0.74
49390.50	1.21	1.15	1.14	1.04	1.20	1.19	1.19	0.74	0.73	0.72	0.65	0.74	0.74	0.74
49389.50	1.21	1.15	1.14	1.04	1.20	1.19	1.19	0.74	0.72	0.72	0.65	0.74	0.74	0.74
49388.50	1.21	1.15	1.14	1.04	1.20	1.19	1.19	0.74	0.72	0.72	0.65	0.74	0.74	0.74
49387.50	1.21	1.15	1.14	1.04	1.20	1.19	1.19	0.74	0.72	0.71	0.65	0.74	0.74	0.74
49386.50	1.21	1.15	1.14	1.04	1.20	1.19	1.19	0.73	0.72	0.71	0.65	0.74	0.74	0.74
49385.50	1.21	1.15	1.14	1.04	1.20	1.19	1.19	0.73	0.72	0.71	0.65	0.74	0.74	0.73
49384.50	1.21	1.15	1.14	1.04	1.20	1.19	1.19	0.73	0.72	0.71	0.65	0.74	0.74	0.73
49383.50	1.21	1.15	1.14	1.04	1.20	1.19	1.19	0.73	0.72	0.71	0.64	0.74	0.74	0.73
49382.50	1.21	1.15	1.14	1.04	1.20	1.19	1.19	0.73	0.72	0.71	0.64	0.73	0.73	0.73
49381.50	1.21	1.15	1.14	1.04	1.20	1.19	1.19	0.73	0.72	0.71	0.64	0.73	0.73	0.73
49380.50	1.21	1.15	1.14	1.04	1.20	1.19	1.19	0.73	0.71	0.71	0.64	0.73	0.73	0.73
49379.50	1.21	1.15	1.14	1.04	1.20	1.19	1.19	0.73	0.71	0.71	0.64	0.73	0.73	0.73
49378.50	1.21	1.15	1.14	1.04	1.20	1.19	1.19	0.72	0.71	0.71	0.64	0.73	0.73	0.73
49377.50	1.21	1.15	1.14	1.04	1.20	1.19	1.19	0.72	0.71	0.70	0.64	0.73	0.73	0.72
49376.50	1.21	1.15	1.14	1.04	1.20	1.19	1.19	0.72	0.71	0.70	0.64	0.73	0.73	0.72
49375.50	1.21	1.15	1.14	1.04	1.20	1.19	1.19	0.72	0.71	0.70	0.64	0.72	0.73	0.72
49374.50	1.21	1.15	1.14	1.04	1.20	1.19	1.19	0.72	0.71	0.70	0.64	0.72	0.73	0.72
49373.50	1.21	1.15	1.14	1.04	1.20	1.19	1.19	0.72	0.71	0.70	0.64	0.72	0.72	0.72
49372.50	1.21	1.15	1.13	1.04	1.20	1.19	1.19	0.72	0.71	0.70	0.63	0.72	0.72	0.72
49371.50	1.21	1.15	1.13	1.04	1.20	1.19	1.19	0.72	0.70	0.70	0.63	0.72	0.72	0.72
49370.50	1.21	1.15	1.13	1.04	1.20	1.19	1.19	0.71	0.70	0.70	0.63	0.72	0.72	0.72
49369.50	1.21	1.15	1.13	1.04	1.20	1.19	1.19	0.71	0.70	0.70	0.63	0.72	0.72	0.72
49368.50	1.21	1.15	1.13	1.04	1.20	1.19	1.19	0.71	0.70	0.69	0.63	0.72	0.72	0.71
49367.50	1.21	1.15	1.13	1.04	1.20	1.19	1.19	0.71	0.70	0.69	0.63	0.71	0.72	0.71
49366.50	1.21	1.15	1.13	1.04	1.20	1.19	1.19	0.71	0.70	0.69	0.63	0.71	0.72	0.71
49365.50	1.21	1.15	1.13	1.04	1.20	1.19	1.19	0.71	0.70	0.69	0.63	0.71	0.72	0.71
49364.50	1.21	1.15	1.13	1.04	1.20	1.19	1.18	0.71	0.70	0.69	0.63	0.71	0.71	0.71
49363.50	1.21	1.15	1.13	1.04	1.20	1.19	1.18	0.70	0.70	0.69	0.63	0.71	0.71	0.71
49362.50	1.21	1.15	1.13	1.04	1.20	1.19	1.18	0.70	0.70	0.69	0.63	0.71	0.71	0.71
49361.50	1.21	1.15	1.13	1.04	1.20	1.19	1.18	0.70	0.69	0.69	0.62	0.71	0.71	0.71
49360.50	1.21	1.15	1.13	1.04	1.20	1.19	1.18	0.70	0.69	0.69	0.62	0.71	0.71	0.70
49359.50	1.21	1.15	1.13	1.04	1.20	1.19	1.18	0.70	0.69	0.69	0.62	0.71	0.71	0.70
49358.50	1.21	1.15	1.13	1.04	1.20	1.19	1.18	0.70	0.69	0.68	0.62	0.70	0.71	0.70
49357.50	1.21	1.15	1.13	1.04	1.20	1.19	1.18	0.70	0.69	0.68	0.62	0.70	0.71	0.70
49356.50	1.21	1.15	1.13	1.04	1.20	1.19	1.18	0.70	0.69	0.68	0.62	0.70	0.71	0.70
49355.50	1.21	1.15	1.13	1.04	1.20	1.19	1.18	0.70	0.69	0.68	0.62	0.70	0.70	0.70
49354.50	1.21	1.15	1.13	1.04	1.20	1.19	1.18	0.69	0.69	0.68	0.62	0.70	0.70	0.70
49353.50	1.21	1.15	1.13	1.04	1.20	1.19	1.18	0.69	0.69	0.68	0.62	0.70	0.70	0.70
49352.50	1.21	1.15	1.13	1.04	1.20	1.19	1.18	0.69	0.69	0.68	0.62	0.70	0.70	0.70
49351.50	1.21	1.15	1.13	1.04	1.20	1.19	1.18	0.69	0.68	0.68	0.62	0.70	0.70	0.69
49350.50	1.21	1.15	1.13	1.04	1.20	1.19	1.18	0.69	0.68	0.68	0.61	0.69	0.70	0.69
49349.50	1.21	1.15	1.13	1.04	1.20	1.19	1.18	0.69	0.68	0.68	0.61	0.69	0.70	0.69
49348.50	1.21	1.15	1.13	1.04	1.20	1.19	1.18	0.69	0.68	0.68	0.61	0.69	0.70	0.69
49347.50	1.21	1.15	1.13	1.04	1.20	1.19	1.18	0.69	0.68	0.67	0.61	0.69	0.70	0.69
49346.50	1.21	1.15	1.13	1.04	1.20	1.19	1.18	0.68	0.68	0.67	0.61	0.69	0.70	0.69
49345.50	1.21	1.15	1.13	1.04	1.20	1.18	1.18	0.68	0.68	0.67	0.61	0.69	0.69	0.69
49344.50	1.21	1.15	1.13	1.04	1.20	1.18	1.18	0.68	0.68	0.67	0.61	0.69	0.69	0.69
49343.50	1.21	1.15	1.13	1.04	1.20	1.18	1.18	0.68	0.68	0.67	0.61	0.69	0.69	0.69
49342.50	1.21	1.15	1.13	1.04	1.20	1.18	1.18	0.68	0.68	0.67	0.61	0.69	0.69	0.69
49341.50	1.21	1.15	1.13	1.04	1.20	1.18	1.18	0.68	0.67	0.67	0.61	0.68	0.69	0.68
49340.50	1.21	1.15	1.13	1.04	1.20	1.18	1.18	0.68	0.67	0.67	0.61	0.68	0.69	0.68
49339.50	1.20	1.15	1.13	1.04	1.20	1.18	1.18	0.68	0.67	0.67	0.61	0.68	0.69	0.68
49338.50	1.20	1.15	1.13	1.04	1.20	1.18	1.18	0.68	0.67	0.67	0.60	0.68	0.69	0.68
49337.50	1.20	1.15	1.13	1.04	1.20	1.18	1.18	0.67	0.67	0.67	0.60	0.68	0.69	0.68
49336.50	1.20	1.15	1.13	1.04	1.20	1.18	1.18	0.67	0.67	0.66	0.60	0.68	0.69	0.68
49335.50	1.20	1.15	1.13	1.04	1.20	1.18	1.18	0.67	0.67	0.66	0.60	0.68	0.68	0.68
49334.50	1.20	1.15	1.13	1.04	1.20	1.18	1.18	0.67	0.67	0.66	0.60	0.68	0.68	0.68
49333.50	1.20	1.15	1.13	1.04	1.20	1.18	1.18	0.67	0.67	0.66	0.60	0.68	0.68	0.68
49332.50	1.20	1.15	1.13	1.04	1.20	1.18	1.18	0.67	0.67	0.66	0.60	0.67	0.68	0.68
49331.50	1.20	1.15	1.13	1.04	1.20	1.18	1.18	0.67	0.67	0.66	0.60	0.67	0.68	0.67
49330.50	1.20	1.15	1.13	1.04	1.20	1.18	1.18	0.67	0.67	0.66	0.60	0.67	0.68	0.67
49329.50	1.20	1.15	1.13	1.04	1.20	1.18	1.18	0.67	0.66	0.66	0.60	0.67	0.68	0.67
49328.50	1.20	1.15	1.13	1.04	1.20	1.18	1.18	0.66	0.66	0.66	0.60	0.67	0.68	0.67
49327.50	1.20	1.15	1.13	1.04	1.20	1.18	1.18	0.66	0.66	0.66	0.60	0.67	0.68	0.67
49326.50	1.20	1.15	1.13	1.04	1.20	1.18	1.18	0.66	0.66	0.66	0.60	0.67	0.68	0.67
49325.50	1.20	1.15	1.13	1.04	1.20	1.18	1.18	0.66	0.66	0.66	0.59	0.67	0.67	0.67
49324.50	1.20	1.15	1.13	1.04	1.20	1.18	1.18	0.66	0.66	0.65	0.59	0.67	0.67	0.67
49323.50	1.20	1.15	1.13	1.04	1.20	1.18	1.18	0.66	0.66	0.65	0.59	0.67	0.67	0.67
49322.50	1.20	1.15	1.13	1.04	1.20	1.18	1.18	0.66	0.66	0.65	0.59	0.66	0.67	0.67
49321.50	1.20	1.15	1.13	1.04	1.20	1.18	1.18	0.66	0.66	0.65	0.59	0.66	0.67	0.67
49320.50	1.20	1.15	1.13	1.04	1.20	1.18	1.18	0.66	0.66	0.65	0.59	0.66	0.67	0.66
49319.50	1.20	1.15	1.13	1.04	1.20	1.18	1.18	0.65	0.66	0.65	0.59	0.66	0.67	0.66
49318.50	1.20	1.15	1.13	1.04	1.20	1.18	1.18	0.65	0.66	0.65	0.59	0.66	0.67	0.66
49317.50	1.20	1.15	1.13	1.04	1.20	1.18	1.18	0.65	0.65	0.65	0.59	0.66	0.67	0.66
49316.50	1.20	1.15	1.13	1.04	1.20	1.18	1.18	0.65	0.65	0.65	0.59	0.66	0.67	0.66
49315.50	1.20	1.15	1.13	1.04	1.19	1.18	1.18	0.65	0.65	0.65	0.59	0.66	0.67	0.66
49314.50	1.20	1.15	1.13	1.04	1.19	1.18	1.18	0.65	0.65	0.65	0.59	0.66	0.67	0.66
49313.50	1.20	1.15	1.13	1.04	1.19	1.18	1.18	0.65	0.65	0.65	0.59	0.66	0.66	0.66
49312.50	1.20	1.15	1.13	1.04	1.19	1.18	1.18	0.65	0.65	0.65	0.59	0.65	0.66	0.66
49311.50	1.20	1.15	1.13	1.04	1.19	1.18	1.18	0.65	0.65	0.64	0.59	0.65	0.66	0.66
49310.50	1.20	1.15	1.13	1.04	1.19	1.18	1.18	0.65	0.65	0.64	0.58	0.65	0.66	0.66
49309.50	1.20	1.15	1.13	1.04	1.19	1.18	1.18	0.65	0.65	0.64	0.58	0.65	0.66	0.65
49308.50	1.20	1.15	1.13	1.04	1.19	1.18	1.18	0.64	0.65	0.64	0.58	0.65	0.66	0.65
49307.50	1.20	1.15	1.13	1.04	1.19	1.18	1.18	0.64	0.65	0.64	0.58	0.65	0.66	0.65
49306.50	1.20	1.15	1.13	1.04	1.19	1.18	1.18	0.64	0.65	0.64	0.58	0.65	0.66	0.65
49305.50	1.20	1.15	1.13	1.04	1.19	1.18	1.18	0.64	0.65	0.64	0.58	0.65	0.66	0.65
49304.50	1.20	1.15	1.13	1.04	1.19	1.18	1.18	0.64	0.64	0.64	0.58	0.65	0.66	0.65
49303.50	1.20	1.15	1.13	1.04	1.19	1.18	1.18	0.64	0.64	0.64	0.58	0.65	0.66	0.65
49302.50	1.20	1.14	1.13	1.04	1.19	1.18	1.18	0.64	0.64	0.64	0.58	0.65	0.66	0.65
49301.50	1.20	1.14	1.13	1.04	1.19	1.18	1.18	0.64	0.64	0.64	0.58	0.65	0.65	0.65
49300.50	1.20	1.14	1.13	1.04	1.19	1.18	1.18	0.64	0.64	0.64	0.58	0.64	0.65	0.65
49299.50	1.20	1.14	1.13	1.04	1.19	1.18	1.18	0.64	0.64	0.64	0.58	0.64	0.65	0.65
49298.50	1.20	1.14	1.13	1.04	1.19	1.18	1.18	0.64	0.64	0.64	0.58	0.64	0.65	0.65
49297.50	1.20	1.14	1.13	1.04	1.19	1.18	1.18	0.63	0.64	0.64	0.58	0.64	0.65	0.64
49296.50	1.20	1.14	1.13	1.04	1.19	1.18	1.18	0.63	0.64	0.63	0.58	0.64	0.65	0.64
49295.50	1.20	1.14	1.13	1.04	1.19	1.18	1.18	0.63	0.64	0.63	0.58	0.64	0.65	0.64
49294.50	1.20	1.14	1.13	1.04	1.19	1.18	1.18	0.63	0.64	0.63	0.58	0.64	0.65	0.64
49293.50	1.20	1.14	1.13	1.04	1.19	1.18	1.18	0.63	0.64	0.63	0.57	0.64	0.65	0.64
49292.50	1.20	1.14	1.13	1.04	1.19	1.18	1.18	0.63	0.64	0.63	0.57	0.64	0.65	0.64
49291.50	1.20	1.14	1.13	1.04	1.19	1.18	1.18	0.63	0.64	0.63	0.57	0.64	0.65	0.64
49290.50	1.20	1.14	1.13	1.04	1.19	1.18	1.18	0.63	0.64	0.63	0.57	0.64	0.65	0.64
49289.50	1.20	1.14	1.13	1.04	1.19	1.18	1.18	0.63	0.63	0.63	0.57	0.64	0.65	0.64
49288.50	1.20	1.14	1.13	1.04	1.19	1.18	1.18	0.63	0.63	0.63	0.57	0.63	0.65	0.64
49287.50	1.20	1.14	1.13	1.04	1.19	1.18	1.18	0.63	0.63	0.63	0.57	0.63	0.64	0.64
49286.50	1.20	1.14	1.13	1.04	1.19	1.18	1.18	0.63	0.63	0.63	0.57	0.63	0.64	0.64
49285.50	1.20	1.14	1.13	1.04	1.19	1.18	1.18	0.62	0.63	0.63	0.57	0.63	0.64	0.64
49284.50	1.20	1.14	1.13	1.04	1.19	1.18	1.18	0.62	0.63	0.63	0.57	0.63	0.64	0.64
49283.50	1.20	1.14	1.13	1.04	1.19	1.18	1.18	0.62	0.63	0.63	0.57	0.63	0.64	0.63
49282.50	1.20	1.14	1.13	1.04	1.19	1.18	1.18	0.62	0.63	0.63	0.57	0.63	0.64	0.63
49281.50	1.20	1.14	1.13	1.04	1.19	1.18	1.18	0.62	0.63	0.63	0.57	0.63	0.64	0.63
49280.50	1.20	1.14	1.13	1.03	1.19	1.18	1.18	0.62	0.63	0.63	0.57	0.63	0.64	0.63
49279.50	1.20	1.14	1.13	1.03	1.19	1.18	1.18	0.62	0.63	0.62	0.57	0.63	0.64	0.63
49278.50	1.20	1.14	1.13	1.03	1.19	1.18	1.18	0.62	0.63	0.62	0.57	0.63	0.64	0.63
49277.50	1.20	1.14	1.13	1.03	1.19	1.18	1.18	0.62	0.63	0.62	0.57	0.63	0.64	0.63
49276.50	1.20	1.14	1.13	1.03	1.19	1.18	1.18	0.62	0.63	0.62	0.57	0.63	0.64	0.63
49275.50	1.20	1.14	1.13	1.03	1.19	1.18	1.18	0.62	0.63	0.62	0.57	0.62	0.64	0.63
49274.50	1.20	1.14	1.13	1.03	1.19	1.18	1.17	0.62	0.63	0.62	0.57	0.62	0.64	0.63
49273.50	1.20	1.14	1.13	1.03	1.19	1.18	1.17	0.62	0.63	0.62	0.57	0.62	0.64	0.63
49272.50	1.20	1.14	1.13	1.03	1.19	1.18	1.17	0.62	0.63	0.62	0.56	0.62	0.63	0.63
49271.50	1.20	1.14	1.13	1.03	1.19	1.18	1.17	0.61	0.62	0.62	0.56	0.62	0.63	0.63
49270.50	1.20	1.14	1.13	1.03	1.19	1.18	1.17	0.61	0.62	0.62	0.56	0.62	0.63	0.63
49269.50	1.20	1.14	1.13	1.03	1.19	1.18	1.17	0.61	0.62	0.62	0.56	0.62	0.63	0.63
49268.50	1.20	1.14	1.13	1.03	1.19	1.18	1.17	0.61	0.62	0.62	0.56	0.62	0.63	0.63
49267.50	1.20	1.14	1.12	1.03	1.19	1.18	1.17	0.61	0.62	0.62	0.56	0.62	0.63	0.62
49266.50	1.20	1.14	1.12	1.03	1.19	1.18	1.17	0.61	0.62	0.62	0.56	0.62	0.63	0.62
49265.50	1.20	1.14	1.12	1.03	1.19	1.18	1.17	0.61	0.62	0.62	0.56	0.62	0.63	0.62
49264.50	1.20	1.14	1.12	1.03	1.19	1.18	1.17	0.61	0.62	0.62	0.56	0.62	0.63	0.62
49263.50	1.20	1.14	1.12	1.03	1.19	1.18	1.17	0.61	0.62	0.62	0.56	0.62	0.63	0.62
49262.50	1.20	1.14	1.12	1.03	1.19	1.18	1.17	0.61	0.62	0.62	0.56	0.62	0.63	0.62
49261.50	1.20	1.14	1.12	1.03	1.19	1.18	1.17	0.61	0.62	0.62	0.56	0.62	0.63	0.62
49260.50	1.20	1.14	1.12	1.03	1.19	1.18	1.17	0.61	0.62	0.62	0.56	0.62	0.63	0.62
49259.50	1.20	1.14	1.12	1.03	1.19	1.18	1.17	0.61	0.62	0.62	0.56	0.61	0.63	0.62
49258.50	1.20	1.14	1.12	1.03	1.19	1.18	1.17	0.61	0.62	0.61	0.56	0.61	0.63	0.62
49257.50	1.20	1.14	1.12	1.03	1.19	1.18	1.17	0.61	0.62	0.61	0.56	0.61	0.63	0.62
49256.50	1.20	1.14	1.12	1.03	1.19	1.18	1.17	0.61	0.62	0.61	0.56	0.61	0.63	0.62
49255.50	1.19	1.14	1.12	1.03	1.19	1.18	1.17	0.60	0.62	0.61	0.56	0.61	0.63	0.62
49254.50	1.19	1.14	1.12	1.03	1.19	1.18	1.17	0.60	0.62	0.61	0.56	0.61	0.63	0.62
49253.50	1.19	1.14	1.12	1.03	1.19	1.18	1.17	0.60	0.62	0.61	0.56	0.61	0.62	0.62
49252.50	1.19	1.14	1.12	1.03	1.19	1.18	1.17	0.60	0.62	0.61	0.56	0.61	0.62	0.62
49251.50	1.19	1.14	1.12	1.03	1.19	1.18	1.17	0.60	0.62	0.61	0.56	0.61	0.62	0.62
49250.50	1.19	1.14	1.12	1.03	1.19	1.18	1.17	0.60	0.62	0.61	0.56	0.61	0.62	0.62
49249.50	1.19	1.14	1.12	1.03	1.19	1.17	1.17	0.60	0.62	0.61	0.56	0.61	0.62	0.62
49248.50	1.19	1.14	1.12	1.03	1.19	1.17	1.17	0.60	0.61	0.61	0.56	0.61	0.62	0.61
49247.50	1.19	1.14	1.12	1.03	1.19	1.17	1.17	0.60	0.61	0.61	0.56	0.61	0.62	0.61
49246.50	1.19	1.14	1.12	1.03	1.19	1.17	1.17	0.60	0.61	0.61	0.56	0.61	0.62	0.61
49245.50	1.19	1.14	1.12	1.03	1.19	1.17	1.17	0.60	0.61	0.61	0.56	0.61	0.62	0.61
49244.50	1.19	1.14	1.12	1.03	1.19	1.17	1.17	0.60	0.61	0.61	0.56	0.61	0.62	0.61
49243.50	1.19	1.14	1.12	1.03	1.19	1.17	1.17	0.60	0.61	0.61	0.56	0.61	0.62	0.61
49242.50	1.19	1.14	1.12	1.03	1.19	1.17	1.17	0.60	0.61	0.61	0.56	0.61	0.62	0.61
49241.50	1.19	1.14	1.12	1.03	1.19	1.17	1.17	0.60	0.61	0.61	0.56	0.61	0.62	0.61
49240.50	1.19	1.14	1.12	1.03	1.19	1.17	1.17	0.60	0.61	0.61	0.55	0.61	0.62	0.61
49239.50	1.19	1.14	1.12	1.03	1.19	1.17	1.17	0.60	0.61	0.61	0.55	0.60	0.62	0.61
49238.50	1.19	1.14	1.12	1.03	1.19	1.17	1.17	0.60	0.61	0.61	0.55	0.60	0.62	0.61
49237.50	1.19	1.14	1.12	1.03	1.19	1.17	1.17	0.60	0.61	0.61	0.55	0.60	0.62	0.61
49236.50	1.19	1.14	1.12	1.03	1.19	1.17	1.17	0.60	0.61	0.61	0.55	0.60	0.62	0.61
49235.50	1.19	1.14	1.12	1.03	1.19	1.17	1.17	0.60	0.61	0.61	0.55	0.60	0.62	0.61
49234.50	1.19	1.14	1.12	1.03	1.19	1.17	1.17	0.59	0.61	0.61	0.55	0.60	0.62	0.61
49233.50	1.19	1.14	1.12	1.03	1.19	1.17	1.17	0.59	0.61	0.61	0.55	0.60	0.62	0.61
49232.50	1.19	1.14	1.12	1.03	1.19	1.17	1.17	0.59	0.61	0.61	0.55	0.60	0.62	0.61
49231.50	1.19	1.14	1.12	1.03	1.19	1.17	1.17	0.59	0.61	0.61	0.55	0.60	0.62	0.61
49230.50	1.19	1.14	1.12	1.03	1.19	1.17	1.17	0.59	0.61	0.61	0.55	0.60	0.62	0.61
49229.50	1.19	1.14	1.12	1.03	1.19	1.17	1.17	0.59	0.61	0.61	0.55	0.60	0.62	0.61
49228.50	1.19	1.14	1.12	1.03	1.18	1.17	1.17	0.59	0.61	0.61	0.55	0.60	0.62	0.61
49227.50	1.19	1.14	1.12	1.03	1.18	1.17	1.17	0.59	0.61	0.61	0.55	0.60	0.62	0.61
49226.50	1.19	1.14	1.12	1.03	1.18	1.17	1.17	0.59	0.61	0.61	0.55	0.60	0.62	0.61
49225.50	1.19	1.14	1.12	1.03	1.18	1.17	1.17	0.59	0.61	0.61	0.55	0.60	0.61	0.61
49224.50	1.19	1.14	1.12	1.03	1.18	1.17	1.17	0.59	0.61	0.61	0.55	0.60	0.61	0.61
49223.50	1.19	1.14	1.12	1.03	1.18	1.17	1.17	0.59	0.61	0.61	0.55	0.60	0.61	0.61
49222.50	1.19	1.14	1.12	1.03	1.18	1.17	1.17	0.59	0.61	0.60	0.55	0.60	0.61	0.61
49221.50	1.19	1.14	1.12	1.03	1.18	1.17	1.17	0.59	0.61	0.60	0.55	0.60	0.61	0.61
49220.50	1.19	1.14	1.12	1.03	1.18	1.17	1.17	0.59	0.61	0.60	0.55	0.60	0.61	0.61
49219.50	1.19	1.14	1.12	1.03	1.18	1.17	1.17	0.59	0.61	0.60	0.55	0.60	0.61	0.60
49218.50	1.19	1.14	1.12	1.03	1.18	1.17	1.17	0.59	0.61	0.60	0.55	0.60	0.61	0.60
49217.50	1.19	1.14	1.12	1.03	1.18	1.17	1.17	0.59	0.61	0.60	0.55	0.60	0.61	0.60
49216.50	1.19	1.14	1.12	1.03	1.18	1.17	1.17	0.59	0.61	0.60	0.55	0.60	0.61	0.60
49215.50	1.19	1.14	1.12	1.03	1.18	1.17	1.17	0.59	0.61	0.60	0.55	0.60	0.61	0.60
49214.50	1.19	1.14	1.12	1.03	1.18	1.17	1.17	0.59	0.61	0.60	0.55	0.60	0.61	0.60
49213.50	1.19	1.14	1.12	1.03	1.18	1.17	1.17	0.59	0.61	0.60	0.55	0.60	0.61	0.60
49212.50	1.19	1.14	1.12	1.03	1.18	1.17	1.17	0.59	0.61	0.60	0.55	0.60	0.61	0.60
49211.50	1.19	1.14	1.12	1.03	1.18	1.17	1.17	0.59	0.61	0.60	0.55	0.60	0.61	0.60
49210.50	1.19	1.14	1.12	1.03	1.18	1.17	1.17	0.59	0.61	0.60	0.55	0.60	0.61	0.60
49209.50	1.19	1.14	1.12	1.03	1.18	1.17	1.17	0.59	0.61	0.60	0.55	0.59	0.61	0.60
49208.50	1.19	1.14	1.12	1.03	1.18	1.17	1.17	0.59	0.61	0.60	0.55	0.59	0.61	0.60
49207.50	1.19	1.14	1.12	1.03	1.18	1.17	1.17	0.59	0.61	0.60	0.55	0.59	0.61	0.60
49206.50	1.19	1.14	1.12	1.03	1.18	1.17	1.17	0.59	0.61	0.60	0.55	0.59	0.61	0.60
49205.50	1.19	1.14	1.12	1.03	1.18	1.17	1.17	0.59	0.61	0.60	0.55	0.59	0.61	0.60
49204.50	1.19	1.13	1.12	1.03	1.18	1.17	1.17	0.59	0.61	0.60	0.55	0.59	0.61	0.60
49203.50	1.19	1.13	1.12	1.03	1.18	1.17	1.17	0.59	0.61	0.60	0.55	0.59	0.61	0.60
49202.50	1.19	1.13	1.12	1.03	1.18	1.17	1.17	0.59	0.61	0.60	0.55	0.59	0.61	0.60
49201.50	1.19	1.13	1.12	1.03	1.18	1.17	1.17	0.59	0.61	0.60	0.55	0.59	0.61	0.60
49200.50	1.19	1.13	1.12	1.03	1.18	1.17	1.17	0.59	0.61	0.60	0.55	0.59	0.61	0.60
49199.50	1.19	1.13	1.12	1.03	1.18	1.17	1.17	0.59	0.61	0.60	0.55	0.59	0.61	0.60
49198.50	1.19	1.13	1.12	1.03	1.18	1.17	1.17	0.59	0.61	0.60	0.55	0.59	0.61	0.60
49197.50	1.19	1.13	1.12	1.03	1.18	1.17	1.17	0.59	0.61	0.60	0.55	0.59	0.61	0.60
49196.50	1.19	1.13	1.12	1.03	1.18	1.17	1.17	0.58	0.61	0.60	0.55	0.59	0.61	0.60
49195.50	1.19	1.13	1.12	1.03	1.18	1.17	1.17	0.58	0.61	0.60	0.55	0.59	0.61	0.60
49194.50	1.19	1.13	1.12	1.03	1.18	1.17	1.17	0.58	0.61	0.60	0.55	0.59	0.61	0.60
49193.50	1.19	1.13	1.12	1.03	1.18	1.17	1.17	0.58	0.61	0.60	0.55	0.59	0.61	0.60
49192.50	1.19	1.13	1.12	1.03	1.18	1.17	1.17	0.58	0.61	0.60	0.55	0.59	0.61	0.60
49191.50	1.19	1.13	1.12	1.03	1.18	1.17	1.17	0.58	0.61	0.60	0.55	0.59	0.61	0.60
49190.50	1.19	1.13	1.12	1.03	1.18	1.17	1.17	0.58	0.61	0.60	0.55	0.59	0.61	0.60
49189.50	1.19	1.13	1.12	1.03	1.18	1.17	1.17	0.58	0.61	0.60	0.55	0.59	0.61	0.60
49188.50	1.19	1.13	1.12	1.03	1.18	1.17	1.17	0.58	0.61	0.60	0.55	0.59	0.61	0.60
49187.50	1.19	1.13	1.12	1.03	1.18	1.17	1.17	0.58	0.61	0.60	0.55	0.59	0.61	0.60
49186.50	1.19	1.13	1.12	1.03	1.18	1.17	1.17	0.58	0.61	0.60	0.55	0.59	0.61	0.60
49185.50	1.19	1.13	1.12	1.03	1.18	1.17	1.16	0.58	0.61	0.60	0.55	0.59	0.61	0.60
49184.50	1.19	1.13	1.12	1.03	1.18	1.17	1.16	0.58	0.61	0.60	0.55	0.59	0.61	0.60
49183.50	1.19	1.13	1.12	1.03	1.18	1.17	1.16	0.58	0.61	0.60	0.55	0.59	0.61	0.60
49182.50	1.19	1.13	1.12	1.03	1.18	1.17	1.16	0.58	0.61	0.60	0.55	0.59	0.61	0.60
49181.50	1.19	1.13	1.12	1.03	1.18	1.17	1.16	0.58	0.61	0.60	0.55	0.59	0.61	0.60
49180.50	1.19	1.13	1.12	1.03	1.18	1.17	1.16	0.58	0.61	0.60	0.55	0.59	0.61	0.60
49179.50	1.19	1.13	1.12	1.03	1.18	1.17	1.16	0.58	0.61	0.60	0.55	0.59	0.61	0.60
49178.50	1.19	1.13	1.12	1.03	1.18	1.17	1.16	0.58	0.61	0.60	0.55	0.59	0.61	0.60
49177.50	1.19	1.13	1.12	1.03	1.18	1.17	1.16	0.58	0.61	0.60	0.55	0.59	0.61	0.60
49176.50	1.19	1.13	1.12	1.03	1.18	1.17	1.16	0.58	0.61	0.60	0.55	0.59	0.61	0.60
49175.50	1.19	1.13	1.12	1.03	1.18	1.17	1.16	0.58	0.61	0.60	0.55	0.59	0.61	0.60
49174.50	1.19	1.13	1.12	1.03	1.18	1.17	1.16	0.58	0.61	0.60	0.55	0.59	0.61	0.60
49173.50	1.19	1.13	1.12	1.03	1.18	1.17	1.16	0.58	0.61	0.60	0.55	0.59	0.61	0.60
49172.50	1.18	1.13	1.12	1.03	1.18	1.17	1.16	0.58	0.61	0.60	0.55	0.59	0.61	0.60
49171.50	1.18	1.13	1.12	1.03	1.18	1.17	1.16	0.58	0.61	0.61	0.55	0.59	0.61	0.60
49170.50	1.18	1.13	1.12	1.03	1.18	1.17	1.16	0.58	0.61	0.61	0.55	0.59	0.61	0.60
49169.50	1.18	1.13	1.12	1.03	1.18	1.17	1.16	0.58	0.61	0.61	0.55	0.59	0.61	0.60
49168.50	1.18	1.13	1.12	1.03	1.18	1.17	1.16	0.58	0.61	0.61	0.56	0.59	0.61	0.60
49167.50	1.18	1.13	1.12	1.03	1.18	1.17	1.16	0.58	0.61	0.61	0.56	0.59	0.61	0.60
49166.50	1.18	1.13	1.12	1.03	1.18	1.17	1.16	0.58	0.61	0.61	0.56	0.59	0.61	0.60
49165.50	1.18	1.13	1.11	1.03	1.18	1.17	1.16	0.58	0.61	0.61	0.56	0.59	0.61	0.60
49164.50	1.18	1.13	1.11	1.03	1.18	1.17	1.16	0.59	0.61	0.61	0.56	0.59	0.61	0.60
49163.50	1.18	1.13	1.11	1.03	1.18	1.17	1.16	0.59	0.61	0.61	0.56	0.59	0.61	0.60
49162.50	1.18	1.13	1.11	1.03	1.18	1.17	1.16	0.59	0.61	0.61	0.56	0.59	0.61	0.60
49161.50	1.18	1.13	1.11	1.02	1.18	1.17	1.16	0.59	0.61	0.61	0.56	0.59	0.61	0.60
49160.50	1.18	1.13	1.11	1.02	1.18	1.17	1.16	0.59	0.61	0.61	0.56	0.59	0.61	0.60
49159.50	1.18	1.13	1.11	1.02	1.18	1.17	1.16	0.59	0.61	0.61	0.56	0.59	0.61	0.60
49158.50	1.18	1.13	1.11	1.02	1.18	1.17	1.16	0.59	0.61	0.61	0.56	0.59	0.61	0.60
49157.50	1.18	1.13	1.11	1.02	1.18	1.17	1.16	0.59	0.61	0.61	0.56	0.59	0.61	0.60
49156.50	1.18	1.13	1.11	1.02	1.18	1.16	1.16	0.59	0.61	0.61	0.56	0.59	0.61	0.60
49155.50	1.18	1.13	1.11	1.02	1.18	1.16	1.16	0.59	0.61	0.61	0.56	0.59	0.61	0.60
49154.50	1.18	1.13	1.11	1.02	1.18	1.16	1.16	0.59	0.61	0.61	0.56	0.59	0.61	0.60
49153.50	1.18	1.13	1.11	1.02	1.18	1.16	1.16	0.59	0.61	0.61	0.56	0.59	0.61	0.60
49152.50	1.18	1.13	1.11	1.02	1.18	1.16	1.16	0.59	0.61	0.61	0.56	0.59	0.61	0.60
49151.50	1.18	1.13	1.11	1.02	1.18	1.16	1.16	0.59	0.61	0.61	0.56	0.59	0.61	0.60
49150.50	1.18	1.13	1.11	1.02	1.18	1.16	1.16	0.59	0.61	0.61	0.56	0.59	0.61	0.60
49149.50	1.18	1.13	1.11	1.02	1.18	1.16	1.16	0.59	0.61	0.61	0.56	0.59	0.61	0.60
49148.50	1.18	1.13	1.11	1.02	1.18	1.16	1.16	0.59	0.61	0.61	0.56	0.59	0.61	0.60
49147.50	1.18	1.13	1.11	1.02	1.18	1.16	1.16	0.59	0.61	0.61	0.56	0.60	0.61	0.60
49146.50	1.18	1.13	1.11	1.02	1.18	1.16	1.16	0.59	0.61	0.61	0.56	0.60	0.61	0.60
49145.50	1.18	1.13	1.11	1.02	1.18	1.16	1.16	0.59	0.61	0.61	0.56	0.60	0.61	0.60
49144.50	1.18	1.13	1.11	1.02	1.18	1.16	1.16	0.59	0.61	0.61	0.56	0.60	0.61	0.61
49143.50	1.18	1.13	1.11	1.02	1.18	1.16	1.16	0.59	0.61	0.61	0.56	0.60	0.62	0.61
49142.50	1.18	1.13	1.11	1.02	1.18	1.16	1.16	0.59	0.61	0.61	0.56	0.60	0.62	0.61
49141.50	1.18	1.13	1.11	1.02	1.17	1.16	1.16	0.59	0.61	0.61	0.56	0.60	0.62	0.61
49140.50	1.18	1.13	1.11	1.02	1.17	1.16	1.16	0.59	0.62	0.61	0.56	0.60	0.62	0.61
49139.50	1.18	1.13	1.11	1.02	1.17	1.16	1.16	0.59	0.62	0.61	0.56	0.60	0.62	0.61
49138.50	1.18	1.13	1.11	1.02	1.17	1.16	1.16	0.59	0.62	0.61	0.56	0.60	0.62	0.61
49137.50	1.18	1.13	1.11	1.02	1.17	1.16	1.16	0.59	0.62	0.61	0.56	0.60	0.62	0.61
49136.50	1.18	1.13	1.11	1.02	1.17	1.16	1.16	0.59	0.62	0.61	0.56	0.60	0.62	0.61
49135.50	1.18	1.13	1.11	1.02	1.17	1.16	1.16	0.59	0.62	0.61	0.56	0.60	0.62	0.61
49134.50	1.18	1.13	1.11	1.02	1.17	1.16	1.16	0.59	0.62	0.61	0.57	0.60	0.62	0.61
49133.50	1.18	1.13	1.11	1.02	1.17	1.16	1.16	0.59	0.62	0.62	0.57	0.60	0.62	0.61
49132.50	1.18	1.13	1.11	1.02	1.17	1.16	1.16	0.59	0.62	0.62	0.57	0.60	0.62	0.61
49131.50	1.18	1.13	1.11	1.02	1.17	1.16	1.16	0.59	0.62	0.62	0.57	0.60	0.62	0.61
49130.50	1.18	1.13	1.11	1.02	1.17	1.16	1.16	0.59	0.62	0.62	0.57	0.60	0.62	0.61
49129.50	1.18	1.13	1.11	1.02	1.17	1.16	1.16	0.59	0.62	0.62	0.57	0.60	0.62	0.61
49128.50	1.18	1.13	1.11	1.02	1.17	1.16	1.16	0.59	0.62	0.62	0.57	0.60	0.62	0.61
49127.50	1.18	1.13	1.11	1.02	1.17	1.16	1.16	0.59	0.62	0.62	0.57	0.60	0.62	0.61
49126.50	1.18	1.13	1.11	1.02	1.17	1.16	1.16	0.59	0.62	0.62	0.57	0.60	0.62	0.61
49125.50	1.18	1.13	1.11	1.02	1.17	1.16	1.16	0.59	0.62	0.62	0.57	0.60	0.62	0.61
49124.50	1.18	1.13	1.11	1.02	1.17	1.16	1.16	0.60	0.62	0.62	0.57	0.60	0.62	0.61
49123.50	1.18	1.13	1.11	1.02	1.17	1.16	1.16	0.60	0.62	0.62	0.57	0.60	0.62	0.61
49122.50	1.18	1.13	1.11	1.02	1.17	1.16	1.16	0.60	0.62	0.62	0.57	0.60	0.62	0.61
49121.50	1.18	1.13	1.11	1.02	1.17	1.16	1.16	0.60	0.62	0.62	0.57	0.60	0.62	0.61
49120.50	1.18	1.13	1.11	1.02	1.17	1.16	1.16	0.60	0.62	0.62	0.57	0.60	0.62	0.61
49119.50	1.18	1.13	1.11	1.02	1.17	1.16	1.16	0.60	0.62	0.62	0.57	0.60	0.62	0.61
49118.50	1.18	1.13	1.11	1.02	1.17	1.16	1.16	0.60	0.62	0.62	0.57	0.60	0.62	0.61
49117.50	1.18	1.13	1.11	1.02	1.17	1.16	1.16	0.60	0.62	0.62	0.57	0.60	0.62	0.61
49116.50	1.18	1.13	1.11	1.02	1.17	1.16	1.16	0.60	0.62	0.62	0.57	0.60	0.62	0.61
49115.50	1.18	1.13	1.11	1.02	1.17	1.16	1.16	0.60	0.63	0.62	0.57	0.60	0.62	0.61
49114.50	1.18	1.13	1.11	1.02	1.17	1.16	1.16	0.60	0.63	0.62	0.57	0.61	0.63	0.62
49113.50	1.18	1.13	1.11	1.02	1.17	1.16	1.16	0.60	0.63	0.62	0.57	0.61	0.63	0.62
49112.50	1.18	1.13	1.11	1.02	1.17	1.16	1.16	0.60	0.63	0.62	0.57	0.61	0.63	0.62
49111.50	1.18	1.13	1.11	1.02	1.17	1.16	1.16	0.60	0.63	0.62	0.58	0.61	0.63	0.62
49110.50	1.18	1.13	1.11	1.02	1.17	1.16	1.16	0.60	0.63	0.62	0.58	0.61	0.63	0.62
49109.50	1.18	1.13	1.11	1.02	1.17	1.16	1.16	0.60	0.63	0.63	0.58	0.61	0.63	0.62
49108.50	1.18	1.13	1.11	1.02	1.17	1.16	1.16	0.60	0.63	0.63	0.58	0.61	0.63	0.62
49107.50	1.18	1.13	1.11	1.02	1.17	1.16	1.16	0.60	0.63	0.63	0.58	0.61	0.63	0.62
49106.50	1.18	1.13	1.11	1.02	1.17	1.16	1.16	0.60	0.63	0.63	0.58	0.61	0.63	0.62
49105.50	1.18	1.12	1.11	1.02	1.17	1.16	1.16	0.60	0.63	0.63	0.58	0.61	0.63	0.62
49104.50	1.18	1.12	1.11	1.02	1.17	1.16	1.16	0.60	0.63	0.63	0.58	0.61	0.63	0.62
49103.50	1.18	1.12	1.11	1.02	1.17	1.16	1.16	0.60	0.63	0.63	0.58	0.61	0.63	0.62
49102.50	1.18	1.12	1.11	1.02	1.17	1.16	1.16	0.60	0.63	0.63	0.58	0.61	0.63	0.62
49101.50	1.18	1.12	1.11	1.02	1.17	1.16	1.16	0.61	0.63	0.63	0.58	0.61	0.63	0.62
49100.50	1.18	1.12	1.11	1.02	1.17	1.16	1.16	0.61	0.63	0.63	0.58	0.61	0.63	0.62
49099.50	1.18	1.12	1.11	1.02	1.17	1.16	1.16	0.61	0.63	0.63	0.58	0.61	0.63	0.62
49098.50	1.18	1.12	1.11	1.02	1.17	1.16	1.16	0.61	0.63	0.63	0.58	0.61	0.63	0.62
49097.50	1.18	1.12	1.11	1.02	1.17	1.16	1.16	0.61	0.63	0.63	0.58	0.61	0.63	0.62
49096.50	1.18	1.12	1.11	1.02	1.17	1.16	1.16	0.61	0.63	0.63	0.58	0.61	0.63	0.62
49095.50	1.18	1.12	1.11	1.02	1.17	1.16	1.15	0.61	0.64	0.63	0.58	0.61	0.63	0.62
49094.50	1.18	1.12	1.11	1.02	1.17	1.16	1.15	0.61	0.64	0.63	0.58	0.61	0.63	0.62
49093.50	1.18	1.12	1.11	1.02	1.17	1.16	1.15	0.61	0.64	0.63	0.58	0.62	0.63	0.62
49092.50	1.18	1.12	1.11	1.02	1.17	1.16	1.15	0.61	0.64	0.63	0.59	0.62	0.64	0.63
49091.50	1.18	1.12	1.11	1.02	1.17	1.16	1.15	0.61	0.64	0.63	0.59	0.62	0.64	0.63
49090.50	1.18	1.12	1.11	1.02	1.17	1.16	1.15	0.61	0.64	0.64	0.59	0.62	0.64	0.63
49089.50	1.18	1.12	1.11	1.02	1.17	1.16	1.15	0.61	0.64	0.64	0.59	0.62	0.64	0.63
49088.50	1.18	1.12	1.11	1.02	1.17	1.16	1.15	0.61	0.64	0.64	0.59	0.62	0.64	0.63
49087.50	1.17	1.12	1.11	1.02	1.17	1.16	1.15	0.61	0.64	0.64	0.59	0.62	0.64	0.63
49086.50	1.17	1.12	1.11	1.02	1.17	1.16	1.15	0.61	0.64	0.64	0.59	0.62	0.64	0.63
49085.50	1.17	1.12	1.11	1.02	1.17	1.16	1.15	0.61	0.64	0.64	0.59	0.62	0.64	0.63
49084.50	1.17	1.12	1.11	1.02	1.17	1.16	1.15	0.61	0.64	0.64	0.59	0.62	0.64	0.63
49083.50	1.17	1.12	1.11	1.02	1.17	1.16	1.15	0.62	0.64	0.64	0.59	0.62	0.64	0.63
49082.50	1.17	1.12	1.11	1.02	1.17	1.16	1.15	0.62	0.64	0.64	0.59	0.62	0.64	0.63
49081.50	1.17	1.12	1.11	1.02	1.17	1.16	1.15	0.62	0.64	0.64	0.59	0.62	0.64	0.63
49080.50	1.17	1.12	1.11	1.02	1.17	1.16	1.15	0.62	0.64	0.64	0.59	0.62	0.64	0.63
49079.50	1.17	1.12	1.11	1.02	1.17	1.16	1.15	0.62	0.64	0.64	0.59	0.62	0.64	0.63
49078.50	1.17	1.12	1.11	1.02	1.17	1.16	1.15	0.62	0.65	0.64	0.59	0.62	0.64	0.63
49077.50	1.17	1.12	1.11	1.02	1.17	1.16	1.15	0.62	0.65	0.64	0.59	0.62	0.64	0.63
49076.50	1.17	1.12	1.11	1.02	1.17	1.16	1.15	0.62	0.65	0.64	0.59	0.62	0.64	0.63
49075.50	1.17	1.12	1.11	1.02	1.17	1.16	1.15	0.62	0.65	0.64	0.59	0.63	0.64	0.63
49074.50	1.17	1.12	1.11	1.02	1.17	1.16	1.15	0.62	0.65	0.64	0.60	0.63	0.65	0.64
49073.50	1.17	1.12	1.11	1.02	1.17	1.16	1.15	0.62	0.65	0.65	0.60	0.63	0.65	0.64
49072.50	1.17	1.12	1.11	1.02	1.17	1.16	1.15	0.62	0.65	0.65	0.60	0.63	0.65	0.64
49071.50	1.17	1.12	1.11	1.02	1.17	1.16	1.15	0.62	0.65	0.65	0.60	0.63	0.65	0.64
49070.50	1.17	1.12	1.11	1.02	1.17	1.16	1.15	0.62	0.65	0.65	0.60	0.63	0.65	0.64
49069.50	1.17	1.12	1.11	1.02	1.17	1.16	1.15	0.62	0.65	0.65	0.60	0.63	0.65	0.64
49068.50	1.17	1.12	1.11	1.02	1.17	1.16	1.15	0.63	0.65	0.65	0.60	0.63	0.65	0.64
49067.50	1.17	1.12	1.11	1.02	1.17	1.16	1.15	0.63	0.65	0.65	0.60	0.63	0.65	0.64
49066.50	1.17	1.12	1.11	1.02	1.17	1.16	1.15	0.63	0.65	0.65	0.60	0.63	0.65	0.64
49065.50	1.17	1.12	1.11	1.02	1.17	1.16	1.15	0.63	0.65	0.65	0.60	0.63	0.65	0.64
49064.50	1.17	1.12	1.11	1.02	1.17	1.16	1.15	0.63	0.65	0.65	0.60	0.63	0.65	0.64
49063.50	1.17	1.12	1.11	1.02	1.17	1.15	1.15	0.63	0.65	0.65	0.60	0.63	0.65	0.64
49062.50	1.17	1.12	1.11	1.02	1.17	1.15	1.15	0.63	0.66	0.65	0.60	0.63	0.65	0.64
49061.50	1.17	1.12	1.11	1.02	1.17	1.15	1.15	0.63	0.66	0.65	0.60	0.63	0.65	0.64
49060.50	1.17	1.12	1.10	1.02	1.17	1.15	1.15	0.63	0.66	0.65	0.60	0.64	0.65	0.64
49059.50	1.17	1.12	1.10	1.02	1.17	1.15	1.15	0.63	0.66	0.65	0.61	0.64	0.65	0.64
49058.50	1.17	1.12	1.10	1.02	1.17	1.15	1.15	0.63	0.66	0.65	0.61	0.64	0.66	0.65
49057.50	1.17	1.12	1.10	1.02	1.17	1.15	1.15	0.63	0.66	0.66	0.61	0.64	0.66	0.65
49056.50	1.17	1.12	1.10	1.02	1.17	1.15	1.15	0.63	0.66	0.66	0.61	0.64	0.66	0.65
49055.50	1.17	1.12	1.10	1.02	1.17	1.15	1.15	0.63	0.66	0.66	0.61	0.64	0.66	0.65
49054.50	1.17	1.12	1.10	1.02	1.17	1.15	1.15	0.64	0.66	0.66	0.61	0.64	0.66	0.65
49053.50	1.17	1.12	1.10	1.02	1.17	1.15	1.15	0.64	0.66	0.66	0.61	0.64	0.66	0.65
49052.50	1.17	1.12	1.10	1.02	1.17	1.15	1.15	0.64	0.66	0.66	0.61	0.64	0.66	0.65
49051.50	1.17	1.12	1.10	1.02	1.17	1.15	1.15	0.64	0.66	0.66	0.61	0.64	0.66	0.65
49050.50	1.17	1.12	1.10	1.02	1.16	1.15	1.15	0.64	0.66	0.66	0.61	0.64	0.66	0.65
49049.50	1.17	1.12	1.10	1.02	1.16	1.15	1.15	0.64	0.66	0.66	0.61	0.64	0.66	0.65
49048.50	1.17	1.12	1.10	1.02	1.16	1.15	1.15	0.64	0.67	0.66	0.61	0.64	0.66	0.65
49047.50	1.17	1.12	1.10	1.02	1.16	1.15	1.15	0.64	0.67	0.66	0.61	0.64	0.66	0.65
49046.50	1.17	1.12	1.10	1.02	1.16	1.15	1.15	0.64	0.67	0.66	0.61	0.64	0.66	0.65
49045.50	1.17	1.12	1.10	1.02	1.16	1.15	1.15	0.64	0.67	0.66	0.61	0.65	0.66	0.65
49044.50	1.17	1.12	1.10	1.02	1.16	1.15	1.15	0.64	0.67	0.66	0.62	0.65	0.67	0.66
49043.50	1.17	1.12	1.10	1.02	1.16	1.15	1.15	0.64	0.67	0.67	0.62	0.65	0.67	0.66
49042.50	1.17	1.12	1.10	1.02	1.16	1.15	1.15	0.64	0.67	0.67	0.62	0.65	0.67	0.66
49041.50	1.17	1.12	1.10	1.02	1.16	1.15	1.15	0.65	0.67	0.67	0.62	0.65	0.67	0.66
49040.50	1.17	1.12	1.10	1.02	1.16	1.15	1.15	0.65	0.67	0.67	0.62	0.65	0.67	0.66
49039.50	1.17	1.12	1.10	1.02	1.16	1.15	1.15	0.65	0.67	0.67	0.62	0.65	0.67	0.66
49038.50	1.17	1.12	1.10	1.02	1.16	1.15	1.15	0.65	0.67	0.67	0.62	0.65	0.67	0.66
49037.50	1.17	1.12	1.10	1.02	1.16	1.15	1.15	0.65	0.67	0.67	0.62	0.65	0.67	0.66
49036.50	1.17	1.12	1.10	1.02	1.16	1.15	1.15	0.65	0.67	0.67	0.62	0.65	0.67	0.66
49035.50	1.17	1.12	1.10	1.01	1.16	1.15	1.15	0.65	0.67	0.67	0.62	0.65	0.67	0.66
49034.50	1.17	1.12	1.10	1.01	1.16	1.15	1.15	0.65	0.68	0.67	0.62	0.65	0.67	0.66
49033.50	1.17	1.12	1.10	1.01	1.16	1.15	1.15	0.65	0.68	0.67	0.62	0.65	0.67	0.66
49032.50	1.17	1.12	1.10	1.01	1.16	1.15	1.15	0.65	0.68	0.67	0.62	0.66	0.67	0.66
49031.50	1.17	1.12	1.10	1.01	1.16	1.15	1.15	0.65	0.68	0.67	0.62	0.66	0.67	0.66
49030.50	1.17	1.12	1.10	1.01	1.16	1.15	1.15	0.65	0.68	0.67	0.63	0.66	0.68	0.67
49029.50	1.17	1.12	1.10	1.01	1.16	1.15	1.15	0.65	0.68	0.68	0.63	0.66	0.68	0.67
49028.50	1.17	1.12	1.10	1.01	1.16	1.15	1.15	0.66	0.68	0.68	0.63	0.66	0.68	0.67
49027.50	1.17	1.12	1.10	1.01	1.16	1.15	1.15	0.66	0.68	0.68	0.63	0.66	0.68	0.67
49026.50	1.17	1.12	1.10	1.01	1.16	1.15	1.15	0.66	0.68	0.68	0.63	0.66	0.68	0.67
49025.50	1.17	1.12	1.10	1.01	1.16	1.15	1.15	0.66	0.68	0.68	0.63	0.66	0.68	0.67
49024.50	1.17	1.12	1.10	1.01	1.16	1.15	1.15	0.66	0.68	0.68	0.63	0.66	0.68	0.67
49023.50	1.17	1.12	1.10	1.01	1.16	1.15	1.15	0.66	0.68	0.68	0.63	0.66	0.68	0.67
49022.50	1.17	1.12	1.10	1.01	1.16	1.15	1.15	0.66	0.68	0.68	0.63	0.66	0.68	0.67
49021.50	1.17	1.12	1.10	1.01	1.16	1.15	1.15	0.66	0.69	0.68	0.63	0.66	0.68	0.67
49020.50	1.17	1.12	1.10	1.01	1.16	1.15	1.15	0.66	0.69	0.68	0.63	0.66	0.68	0.67
49019.50	1.17	1.12	1.10	1.01	1.16	1.15	1.15	0.66	0.69	0.68	0.63	0.67	0.68	0.67
49018.50	1.17	1.12	1.10	1.01	1.16	1.15	1.15	0.66	0.69	0.68	0.63	0.67	0.68	0.67
49017.50	1.17	1.12	1.10	1.01	1.16	1.15	1.15	0.66	0.69	0.68	0.64	0.67	0.69	0.68
49016.50	1.17	1.12	1.10	1.01	1.16	1.15	1.15	0.67	0.69	0.69	0.64	0.67	0.69	0.68
49015.50	1.17	1.12	1.10	1.01	1.16	1.15	1.15	0.67	0.69	0.69	0.64	0.67	0.69	0.68
49014.50	1.17	1.12	1.10	1.01	1.16	1.15	1.15	0.67	0.69	0.69	0.64	0.67	0.69	0.68
49013.50	1.17	1.12	1.10	1.01	1.16	1.15	1.15	0.67	0.69	0.69	0.64	0.67	0.69	0.68
49012.50	1.17	1.12	1.10	1.01	1.16	1.15	1.15	0.67	0.69	0.69	0.64	0.67	0.69	0.68
49011.50	1.17	1.12	1.10	1.01	1.16	1.15	1.15	0.67	0.69	0.69	0.64	0.67	0.69	0.68
49010.50	1.17	1.12	1.10	1.01	1.16	1.15	1.15	0.67	0.69	0.69	0.64	0.67	0.69	0.68
49009.50	1.17	1.12	1.10	1.01	1.16	1.15	1.15	0.67	0.70	0.69	0.64	0.67	0.69	0.68
49008.50	1.17	1.12	1.10	1.01	1.16	1.15	1.15	0.67	0.70	0.69	0.64	0.67	0.69	0.68
49007.50	1.17	1.12	1.10	1.01	1.16	1.15	1.15	0.67	0.70	0.69	0.64	0.68	0.69	0.68
49006.50	1.17	1.12	1.10	1.01	1.16	1.15	1.15	0.67	0.70	0.69	0.64	0.68	0.69	0.68
49005.50	1.17	1.12	1.10	1.01	1.16	1.15	1.15	0.68	0.70	0.69	0.64	0.68	0.69	0.69
49004.50	1.17	1.12	1.10	1.01	1.16	1.15	1.15	0.68	0.70	0.69	0.65	0.68	0.70	0.69
49003.50	1.17	1.12	1.10	1.01	1.16	1.15	1.15	0.68	0.70	0.70	0.65	0.68	0.70	0.69
49002.50	1.17	1.12	1.10	1.01	1.16	1.15	1.15	0.68	0.70	0.70	0.65	0.68	0.70	0.69
49001.50	1.17	1.12	1.10	1.01	1.16	1.15	1.15	0.68	0.70	0.70	0.65	0.68	0.70	0.69
49000.50	1.17	1.12	1.10	1.01	1.16	1.15	1.15	0.68	0.70	0.70	0.65	0.68	0.70	0.69
48999.50	1.17	1.11	1.10	1.01	1.16	1.15	1.15	0.68	0.70	0.70	0.65	0.68	0.70	0.69
48998.50	1.17	1.11	1.10	1.01	1.16	1.15	1.15	0.68	0.70	0.70	0.65	0.68	0.70	0.69
48997.50	1.17	1.11	1.10	1.01	1.16	1.15	1.14	0.68	0.70	0.70	0.65	0.68	0.70	0.69
48996.50	1.17	1.11	1.10	1.01	1.16	1.15	1.14	0.68	0.71	0.70	0.65	0.69	0.70	0.69
48995.50	1.16	1.11	1.10	1.01	1.16	1.15	1.14	0.68	0.71	0.70	0.65	0.69	0.70	0.69
48994.50	1.16	1.11	1.10	1.01	1.16	1.15	1.14	0.69	0.71	0.70	0.65	0.69	0.70	0.69
48993.50	1.16	1.11	1.10	1.01	1.16	1.15	1.14	0.69	0.71	0.70	0.65	0.69	0.70	0.70
48992.50	1.16	1.11	1.10	1.01	1.16	1.15	1.14	0.69	0.71	0.70	0.65	0.69	0.71	0.70
48991.50	1.16	1.11	1.10	1.01	1.16	1.15	1.14	0.69	0.71	0.71	0.66	0.69	0.71	0.70
48990.50	1.16	1.11	1.10	1.01	1.16	1.15	1.14	0.69	0.71	0.71	0.66	0.69	0.71	0.70
48989.50	1.16	1.11	1.10	1.01	1.16	1.15	1.14	0.69	0.71	0.71	0.66	0.69	0.71	0.70
48988.50	1.16	1.11	1.10	1.01	1.16	1.15	1.14	0.69	0.71	0.71	0.66	0.69	0.71	0.70
48987.50	1.16	1.11	1.10	1.01	1.16	1.15	1.14	0.69	0.71	0.71	0.66	0.69	0.71	0.70
48986.50	1.16	1.11	1.10	1.01	1.16	1.15	1.14	0.69	0.71	0.71	0.66	0.69	0.71	0.70
48985.50	1.16	1.11	1.10	1.01	1.16	1.15	1.14	0.69	0.71	0.71	0.66	0.69	0.71	0.70
48984.50	1.16	1.11	1.10	1.01	1.16	1.15	1.14	0.69	0.72	0.71	0.66	0.70	0.71	0.70
48983.50	1.16	1.11	1.10	1.01	1.16	1.15	1.14	0.70	0.72	0.71	0.66	0.70	0.71	0.70
48982.50	1.16	1.11	1.10	1.01	1.16	1.15	1.14	0.70	0.72	0.71	0.66	0.70	0.71	0.70
48981.50	1.16	1.11	1.10	1.01	1.16	1.15	1.14	0.70	0.72	0.71	0.66	0.70	0.71	0.71
48980.50	1.16	1.11	1.10	1.01	1.16	1.15	1.14	0.70	0.72	0.71	0.66	0.70	0.72	0.71
48979.50	1.16	1.11	1.10	1.01	1.16	1.15	1.14	0.70	0.72	0.72	0.66	0.70	0.72	0.71
48978.50	1.16	1.11	1.10	1.01	1.16	1.15	1.14	0.70	0.72	0.72	0.67	0.70	0.72	0.71
48977.50	1.16	1.11	1.10	1.01	1.16	1.15	1.14	0.70	0.72	0.72	0.67	0.70	0.72	0.71
48976.50	1.16	1.11	1.10	1.01	1.16	1.15	1.14	0.70	0.72	0.72	0.67	0.70	0.72	0.71
48975.50	1.16	1.11	1.10	1.01	1.16	1.15	1.14	0.70	0.72	0.72	0.67	0.70	0.72	0.71
48974.50	1.16	1.11	1.10	1.01	1.16	1.15	1.14	0.70	0.72	0.72	0.67	0.70	0.72	0.71
48973.50	1.16	1.11	1.10	1.01	1.16	1.15	1.14	0.70	0.72	0.72	0.67	0.71	0.72	0.71
48972.50	1.16	1.11	1.10	1.01	1.16	1.15	1.14	0.71	0.73	0.72	0.67	0.71	0.72	0.71
48971.50	1.16	1.11	1.10	1.01	1.16	1.14	1.14	0.71	0.73	0.72	0.67	0.71	0.72	0.71
48970.50	1.16	1.11	1.10	1.01	1.16	1.14	1.14	0.71	0.73	0.72	0.67	0.71	0.72	0.71
48969.50	1.16	1.11	1.10	1.01	1.16	1.14	1.14	0.71	0.73	0.72	0.67	0.71	0.72	0.72
48968.50	1.16	1.11	1.10	1.01	1.16	1.14	1.14	0.71	0.73	0.72	0.67	0.71	0.73	0.72
48967.50	1.16	1.11	1.10	1.01	1.16	1.14	1.14	0.71	0.73	0.72	0.67	0.71	0.73	0.72
48966.50	1.16	1.11	1.10	1.01	1.16	1.14	1.14	0.71	0.73	0.73	0.67	0.71	0.73	0.72
48965.50	1.16	1.11	1.10	1.01	1.16	1.14	1.14	0.71	0.73	0.73	0.68	0.71	0.73	0.72
48964.50	1.16	1.11	1.10	1.01	1.16	1.14	1.14	0.71	0.73	0.73	0.68	0.71	0.73	0.72
48963.50	1.16	1.11	1.10	1.01	1.16	1.14	1.14	0.71	0.73	0.73	0.68	0.71	0.73	0.72
48962.50	1.16	1.11	1.10	1.01	1.16	1.14	1.14	0.72	0.73	0.73	0.68	0.72	0.73	0.72
48961.50	1.16	1.11	1.10	1.01	1.16	1.14	1.14	0.72	0.74	0.73	0.68	0.72	0.73	0.72
48960.50	1.16	1.11	1.10	1.01	1.16	1.14	1.14	0.72	0.74	0.73	0.68	0.72	0.73	0.72
48959.50	1.16	1.11	1.10	1.01	1.16	1.14	1.14	0.72	0.74	0.73	0.68	0.72	0.73	0.72
48958.50	1.16	1.11	1.10	1.01	1.16	1.14	1.14	0.72	0.74	0.73	0.68	0.72	0.73	0.73
48957.50	1.16	1.11	1.10	1.01	1.16	1.14	1.14	0.72	0.74	0.73	0.68	0.72	0.73	0.73
48956.50	1.16	1.11	1.10	1.01	1.16	1.14	1.14	0.72	0.74	0.73	0.68	0.72	0.74	0.73
48955.50	1.16	1.11	1.10	1.01	1.16	1.14	1.14	0.72	0.74	0.73	0.68	0.72	0.74	0.73
48954.50	1.16	1.11	1.10	1.01	1.16	1.14	1.14	0.72	0.74	0.74	0.68	0.72	0.74	0.73
48953.50	1.16	1.11	1.10	1.01	1.16	1.14	1.14	0.72	0.74	0.74	0.69	0.72	0.74	0.73
48952.50	1.16	1.11	1.10	1.01	1.16	1.14	1.14	0.73	0.74	0.74	0.69	0.72	0.74	0.73
48951.50	1.16	1.11	1.10	1.01	1.16	1.14	1.14	0.73	0.74	0.74	0.69	0.73	0.74	0.73
48950.50	1.16	1.11	1.10	1.01	1.16	1.14	1.14	0.73	0.74	0.74	0.69	0.73	0.74	0.73
48949.50	1.16	1.11	1.10	1.01	1.16	1.14	1.14	0.73	0.75	0.74	0.69	0.73	0.74	0.73
48948.50	1.16	1.11	1.10	1.01	1.15	1.14	1.14	0.73	0.75	0.74	0.69	0.73	0.74	0.73
48947.50	1.16	1.11	1.10	1.01	1.15	1.14	1.14	0.73	0.75	0.74	0.69	0.73	0.74	0.73
48946.50	1.16	1.11	1.10	1.01	1.15	1.14	1.14	0.73	0.75	0.74	0.69	0.73	0.74	0.74
48945.50	1.16	1.11	1.10	1.01	1.15	1.14	1.14	0.73	0.75	0.74	0.69	0.73	0.74	0.74
48944.50	1.16	1.11	1.10	1.01	1.15	1.14	1.14	0.73	0.75	0.74	0.69	0.73	0.75	0.74
48943.50	1.16	1.11	1.10	1.01	1.15	1.14	1.14	0.73	0.75	0.74	0.69	0.73	0.75	0.74
48942.50	1.16	1.11	1.10	1.01	1.15	1.14	1.14	0.73	0.75	0.75	0.69	0.73	0.75	0.74
48941.50	1.16	1.11	1.10	1.01	1.15	1.14	1.14	0.74	0.75	0.75	0.69	0.74	0.75	0.74
48940.50	1.16	1.11	1.10	1.01	1.15	1.14	1.14	0.74	0.75	0.75	0.70	0.74	0.75	0.74
48939.50	1.16	1.11	1.09	1.01	1.15	1.14	1.14	0.74	0.75	0.75	0.70	0.74	0.75	0.74
48938.50	1.16	1.11	1.09	1.01	1.15	1.14	1.14	0.74	0.75	0.75	0.70	0.74	0.75	0.74
48937.50	1.16	1.11	1.09	1.01	1.15	1.14	1.14	0.74	0.76	0.75	0.70	0.74	0.75	0.74
48936.50	1.16	1.11	1.09	1.01	1.15	1.14	1.14	0.74	0.76	0.75	0.70	0.74	0.75	0.74
48935.50	1.16	1.11	1.09	1.01	1.15	1.14	1.14	0.74	0.76	0.75	0.70	0.74	0.75	0.75
48934.50	1.16	1.11	1.09	1.01	1.15	1.14	1.14	0.74	0.76	0.75	0.70	0.74	0.75	0.75
48933.50	1.16	1.11	1.09	1.01	1.15	1.14	1.14	0.74	0.76	0.75	0.70	0.74	0.76	0.75
48932.50	1.16	1.11	1.09	1.01	1.15	1.14	1.14	0.74	0.76	0.75	0.70	0.74	0.76	0.75
48931.50	1.16	1.11	1.09	1.01	1.15	1.14	1.14	0.75	0.76	0.75	0.70	0.74	0.76	0.75
48930.50	1.16	1.11	1.09	1.01	1.15	1.14	1.14	0.75	0.76	0.76	0.70	0.75	0.76	0.75
48929.50	1.16	1.11	1.09	1.01	1.15	1.14	1.14	0.75	0.76	0.76	0.70	0.75	0.76	0.75
48928.50	1.16	1.11	1.09	1.01	1.15	1.14	1.14	0.75	0.76	0.76	0.71	0.75	0.76	0.75
48927.50	1.16	1.11	1.09	1.01	1.15	1.14	1.14	0.75	0.76	0.76	0.71	0.75	0.76	0.75
48926.50	1.16	1.11	1.09	1.01	1.15	1.14	1.14	0.75	0.77	0.76	0.71	0.75	0.76	0.75
48925.50	1.16	1.11	1.09	1.01	1.15	1.14	1.14	0.75	0.77	0.76	0.71	0.75	0.76	0.75
48924.50	1.16	1.11	1.09	1.01	1.15	1.14	1.14	0.75	0.77	0.76	0.71	0.75	0.76	0.76
48923.50	1.16	1.11	1.09	1.01	1.15	1.14	1.14	0.75	0.77	0.76	0.71	0.75	0.76	0.76
48922.50	1.16	1.11	1.09	1.01	1.15	1.14	1.14	0.75	0.77	0.76	0.71	0.75	0.76	0.76
48921.50	1.16	1.11	1.09	1.01	1.15	1.14	1.14	0.76	0.77	0.76	0.71	0.75	0.77	0.76
48920.50	1.16	1.11	1.09	1.01	1.15	1.14	1.14	0.76	0.77	0.76	0.71	0.75	0.77	0.76
48919.50	1.16	1.11	1.09	1.01	1.15	1.14	1.14	0.76	0.77	0.76	0.71	0.76	0.77	0.76
48918.50	1.16	1.11	1.09	1.01	1.15	1.14	1.14	0.76	0.77	0.77	0.71	0.76	0.77	0.76
48917.50	1.16	1.11	1.09	1.01	1.15	1.14	1.14	0.76	0.77	0.77	0.71	0.76	0.77	0.76
48916.50	1.16	1.11	1.09	1.01	1.15	1.14	1.14	0.76	0.77	0.77	0.71	0.76	0.77	0.76
48915.50	1.16	1.11	1.09	1.01	1.15	1.14	1.14	0.76	0.77	0.77	0.72	0.76	0.77	0.76
48914.50	1.16	1.11	1.09	1.01	1.15	1.14	1.14	0.76	0.78	0.77	0.72	0.76	0.77	0.76
48913.50	1.16	1.11	1.09	1.01	1.15	1.14	1.14	0.76	0.78	0.77	0.72	0.76	0.77	0.76
48912.50	1.16	1.11	1.09	1.01	1.15	1.14	1.14	0.76	0.78	0.77	0.72	0.76	0.77	0.77
48911.50	1.16	1.11	1.09	1.01	1.15	1.14	1.14	0.76	0.78	0.77	0.72	0.76	0.77	0.77
48910.50	1.16	1.11	1.09	1.01	1.15	1.14	1.14	0.77	0.78	0.77	0.72	0.76	0.77	0.77
48909.50	1.16	1.11	1.09	1.01	1.15	1.14	1.14	0.77	0.78	0.77	0.72	0.76	0.78	0.77
48908.50	1.16	1.11	1.09	1.01	1.15	1.14	1.14	0.77	0.78	0.77	0.72	0.77	0.78	0.77
48907.50	1.16	1.11	1.09	1.01	1.15	1.14	1.14	0.77	0.78	0.77	0.72	0.77	0.78	0.77
48906.50	1.16	1.11	1.09	1.01	1.15	1.14	1.14	0.77	0.78	0.78	0.72	0.77	0.78	0.77
48905.50	1.16	1.11	1.09	1.01	1.15	1.14	1.14	0.77	0.78	0.78	0.72	0.77	0.78	0.77
48904.50	1.16	1.11	1.09	1.01	1.15	1.14	1.14	0.77	0.78	0.78	0.72	0.77	0.78	0.77
48903.50	1.16	1.11	1.09	1.01	1.15	1.14	1.14	0.77	0.78	0.78	0.72	0.77	0.78	0.77
48902.50	1.16	1.11	1.09	1.01	1.15	1.14	1.14	0.77	0.79	0.78	0.73	0.77	0.78	0.77
48901.50	1.16	1.11	1.09	1.01	1.15	1.14	1.14	0.77	0.79	0.78	0.73	0.77	0.78	0.78
48900.50	1.16	1.11	1.09	1.01	1.15	1.14	1.14	0.78	0.79	0.78	0.73	0.77	0.78	0.78
48899.50	1.16	1.11	1.09	1.01	1.15	1.14	1.14	0.78	0.79	0.78	0.73	0.77	0.78	0.78
48898.50	1.16	1.11	1.09	1.01	1.15	1.14	1.14	0.78	0.79	0.78	0.73	0.78	0.78	0.78
48897.50	1.16	1.11	1.09	1.01	1.15	1.14	1.14	0.78	0.79	0.78	0.73	0.78	0.79	0.78
48896.50	1.16	1.11	1.09	1.01	1.15	1.14	1.14	0.78	0.79	0.78	0.73	0.78	0.79	0.78
48895.50	1.16	1.11	1.09	1.01	1.15	1.14	1.14	0.78	0.79	0.78	0.73	0.78	0.79	0.78
48894.50	1.16	1.11	1.09	1.01	1.15	1.14	1.14	0.78	0.79	0.78	0.73	0.78	0.79	0.78
48893.50	1.16	1.11	1.09	1.01	1.15	1.14	1.14	0.78	0.79	0.79	0.73	0.78	0.79	0.78
48892.50	1.16	1.11	1.09	1.01	1.15	1.14	1.14	0.78	0.79	0.79	0.73	0.78	0.79	0.78
48891.50	1.16	1.11	1.09	1.01	1.15	1.14	1.14	0.78	0.79	0.79	0.73	0.78	0.79	0.78
48890.50	1.16	1.11	1.09	1.01	1.15	1.14	1.14	0.79	0.79	0.79	0.73	0.78	0.79	0.78
48889.50	1.16	1.11	1.09	1.01	1.15	1.14	1.14	0.79	0.80	0.79	0.73	0.78	0.79	0.79
48888.50	1.16	1.11	1.09	1.01	1.15	1.14	1.14	0.79	0.80	0.79	0.74	0.78	0.79	0.79
48887.50	1.16	1.11	1.09	1.01	1.15	1.14	1.14	0.79	0.80	0.79	0.74	0.79	0.79	0.79
48886.50	1.15	1.11	1.09	1.01	1.15	1.14	1.14	0.79	0.80	0.79	0.74	0.79	0.79	0.79
48885.50	1.15	1.11	1.09	1.01	1.15	1.14	1.14	0.79	0.80	0.79	0.74	0.79	0.80	0.79
48884.50	1.15	1.11	1.09	1.01	1.15	1.14	1.14	0.79	0.80	0.79	0.74	0.79	0.80	0.79
48883.50	1.15	1.11	1.09	1.01	1.15	1.14	1.14	0.79	0.80	0.79	0.74	0.79	0.80	0.79
48882.50	1.15	1.11	1.09	1.01	1.15	1.14	1.14	0.79	0.80	0.79	0.74	0.79	0.80	0.79
48881.50	1.15	1.11	1.09	1.01	1.15	1.14	1.13	0.79	0.80	0.80	0.74	0.79	0.80	0.79
48880.50	1.15	1.11	1.09	1.01	1.15	1.13	1.13	0.79	0.80	0.80	0.74	0.79	0.80	0.79
48879.50	1.15	1.11	1.09	1.01	1.15	1.13	1.13	0.80	0.80	0.80	0.74	0.79	0.80	0.79
48878.50	1.15	1.11	1.09	1.00	1.15	1.13	1.13	0.80	0.80	0.80	0.74	0.79	0.80	0.80
48877.50	1.15	1.11	1.09	1.00	1.15	1.13	1.13	0.80	0.81	0.80	0.74	0.79	0.80	0.80
48876.50	1.15	1.11	1.09	1.00	1.15	1.13	1.13	0.80	0.81	0.80	0.74	0.80	0.80	0.80
48875.50	1.15	1.11	1.09	1.00	1.15	1.13	1.13	0.80	0.81	0.80	0.75	0.80	0.80	0.80
48874.50	1.15	1.11	1.09	1.00	1.15	1.13	1.13	0.80	0.81	0.80	0.75	0.80	0.80	0.80
48873.50	1.15	1.11	1.09	1.00	1.15	1.13	1.13	0.80	0.81	0.80	0.75	0.80	0.80	0.80
48872.50	1.15	1.11	1.09	1.00	1.15	1.13	1.13	0.80	0.81	0.80	0.75	0.80	0.81	0.80
48871.50	1.15	1.11	1.09	1.00	1.15	1.13	1.13	0.80	0.81	0.80	0.75	0.80	0.81	0.80
48870.50	1.15	1.11	1.09	1.00	1.15	1.13	1.13	0.80	0.81	0.80	0.75	0.80	0.81	0.80
48869.50	1.15	1.11	1.09	1.00	1.15	1.13	1.13	0.80	0.81	0.80	0.75	0.80	0.81	0.80
48868.50	1.15	1.10	1.09	1.00	1.15	1.13	1.13	0.81	0.81	0.80	0.75	0.80	0.81	0.80
48867.50	1.15	1.10	1.09	1.00	1.15	1.13	1.13	0.81	0.81	0.81	0.75	0.80	0.81	0.80
48866.50	1.15	1.10	1.09	1.00	1.15	1.13	1.13	0.81	0.81	0.81	0.75	0.80	0.81	0.81
48865.50	1.15	1.10	1.09	1.00	1.15	1.13	1.13	0.81	0.81	0.81	0.75	0.80	0.81	0.81
48864.50	1.15	1.10	1.09	1.00	1.15	1.13	1.13	0.81	0.82	0.81	0.75	0.81	0.81	0.81
48863.50	1.15	1.10	1.09	1.00	1.15	1.13	1.13	0.81	0.82	0.81	0.75	0.81	0.81	0.81
48862.50	1.15	1.10	1.09	1.00	1.15	1.13	1.13	0.81	0.82	0.81	0.75	0.81	0.81	0.81
48861.50	1.15	1.10	1.09	1.00	1.15	1.13	1.13	0.81	0.82	0.81	0.75	0.81	0.81	0.81
48860.50	1.15	1.10	1.09	1.00	1.15	1.13	1.13	0.81	0.82	0.81	0.76	0.81	0.81	0.81
48859.50	1.15	1.10	1.09	1.00	1.15	1.13	1.13	0.81	0.82	0.81	0.76	0.81	0.82	0.81
48858.50	1.15	1.10	1.09	1.00	1.15	1.13	1.13	0.81	0.82	0.81	0.76	0.81	0.82	0.81
48857.50	1.15	1.10	1.09	1.00	1.15	1.13	1.13	0.82	0.82	0.81	0.76	0.81	0.82	0.81
48856.50	1.15	1.10	1.09	1.00	1.15	1.13	1.13	0.82	0.82	0.81	0.76	0.81	0.82	0.81
48855.50	1.15	1.10	1.09	1.00	1.15	1.13	1.13	0.82	0.82	0.81	0.76	0.81	0.82	0.81
48854.50	1.15	1.10	1.09	1.00	1.15	1.13	1.13	0.82	0.82	0.82	0.76	0.81	0.82	0.81
48853.50	1.15	1.10	1.09	1.00	1.15	1.13	1.13	0.82	0.82	0.82	0.76	0.82	0.82	0.82
48852.50	1.15	1.10	1.09	1.00	1.15	1.13	1.13	0.82	0.82	0.82	0.76	0.82	0.82	0.82
48851.50	1.15	1.10	1.09	1.00	1.15	1.13	1.13	0.82	0.83	0.82	0.76	0.82	0.82	0.82
48850.50	1.15	1.10	1.09	1.00	1.15	1.13	1.13	0.82	0.83	0.82	0.76	0.82	0.82	0.82
48849.50	1.15	1.10	1.09	1.00	1.15	1.13	1.13	0.82	0.83	0.82	0.76	0.82	0.82	0.82
48848.50	1.15	1.10	1.09	1.00	1.15	1.13	1.13	0.82	0.83	0.82	0.76	0.82	0.82	0.82
48847.50	1.15	1.10	1.09	1.00	1.15	1.13	1.13	0.82	0.83	0.82	0.76	0.82	0.82	0.82
48846.50	1.15	1.10	1.09	1.00	1.15	1.13	1.13	0.83	0.83	0.82	0.77	0.82	0.83	0.82
48845.50	1.15	1.10	1.09	1.00	1.15	1.13	1.13	0.83	0.83	0.82	0.77	0.82	0.83	0.82
48844.50	1.15	1.10	1.09	1.00	1.15	1.13	1.13	0.83	0.83	0.82	0.77	0.82	0.83	0.82
48843.50	1.15	1.10	1.09	1.00	1.15	1.13	1.13	0.83	0.83	0.82	0.77	0.82	0.83	0.82
48842.50	1.15	1.10	1.09	1.00	1.15	1.13	1.13	0.83	0.83	0.82	0.77	0.82	0.83	0.82
48841.50	1.15	1.10	1.09	1.00	1.15	1.13	1.13	0.83	0.83	0.82	0.77	0.83	0.83	0.83
48840.50	1.15	1.10	1.09	1.00	1.15	1.13	1.13	0.83	0.83	0.83	0.77	0.83	0.83	0.83
48839.50	1.15	1.10	1.09	1.00	1.15	1.13	1.13	0.83	0.83	0.83	0.77	0.83	0.83	0.83
48838.50	1.15	1.10	1.09	1.00	1.15	1.13	1.13	0.83	0.83	0.83	0.77	0.83	0.83	0.83
48837.50	1.15	1.10	1.09	1.00	1.15	1.13	1.13	0.83	0.84	0.83	0.77	0.83	0.83	0.83
48836.50	1.15	1.10	1.09	1.00	1.15	1.13	1.13	0.83	0.84	0.83	0.77	0.83	0.83	0.83
48835.50	1.15	1.10	1.09	1.00	1.15	1.13	1.13	0.83	0.84	0.83	0.77	0.83	0.83	0.83
48834.50	1.15	1.10	1.09	1.00	1.15	1.13	1.13	0.84	0.84	0.83	0.77	0.83	0.83	0.83
48833.50	1.15	1.10	1.09	1.00	1.15	1.13	1.13	0.84	0.84	0.83	0.77	0.83	0.83	0.83
48832.50	1.15	1.10	1.09	1.00	1.15	1.13	1.13	0.84	0.84	0.83	0.77	0.83	0.84	0.83
48831.50	1.15	1.10	1.09	1.00	1.15	1.13	1.13	0.84	0.84	0.83	0.77	0.83	0.84	0.83
48830.50	1.15	1.10	1.09	1.00	1.15	1.13	1.13	0.84	0.84	0.83	0.78	0.83	0.84	0.83
48829.50	1.15	1.10	1.09	1.00	1.15	1.13	1.13	0.84	0.84	0.83	0.78	0.84	0.84	0.83
48828.50	1.15	1.10	1.09	1.00	1.15	1.13	1.13	0.84	0.84	0.83	0.78	0.84	0.84	0.84
48827.50	1.15	1.10	1.09	1.00	1.15	1.13	1.13	0.84	0.84	0.83	0.78	0.84	0.84	0.84
48826.50	1.15	1.10	1.09	1.00	1.15	1.13	1.13	0.84	0.84	0.83	0.78	0.84	0.84	0.84
48825.50	1.15	1.10	1.09	1.00	1.15	1.13	1.13	0.84	0.84	0.84	0.78	0.84	0.84	0.84
48824.50	1.15	1.10	1.09	1.00	1.15	1.13	1.13	0.84	0.84	0.84	0.78	0.84	0.84	0.84
48823.50	1.15	1.10	1.09	1.00	1.15	1.13	1.13	0.84	0.85	0.84	0.78	0.84	0.84	0.84
48822.50	1.15	1.10	1.09	1.00	1.15	1.13	1.13	0.85	0.85	0.84	0.78	0.84	0.84	0.84
48821.50	1.15	1.10	1.09	1.00	1.15	1.13	1.13	0.85	0.85	0.84	0.78	0.84	0.84	0.84
48820.50	1.15	1.10	1.09	1.00	1.15	1.13	1.13	0.85	0.85	0.84	0.78	0.84	0.84	0.84
48819.50	1.15	1.10	1.09	1.00	1.15	1.13	1.13	0.85	0.85	0.84	0.78	0.84	0.84	0.84
48818.50	1.15	1.10	1.09	1.00	1.15	1.13	1.13	0.85	0.85	0.84	0.78	0.84	0.85	0.84
48817.50	1.15	1.10	1.09	1.00	1.14	1.13	1.13	0.85	0.85	0.84	0.78	0.85	0.85	0.84
48816.50	1.15	1.10	1.09	1.00	1.14	1.13	1.13	0.85	0.85	0.84	0.78	0.85	0.85	0.84
48815.50	1.15	1.10	1.09	1.00	1.14	1.13	1.13	0.85	0.85	0.84	0.78	0.85	0.85	0.84
48814.50	1.15	1.10	1.09	1.00	1.14	1.13	1.13	0.85	0.85	0.84	0.78	0.85	0.85	0.85
48813.50	1.15	1.10	1.09	1.00	1.14	1.13	1.13	0.85	0.85	0.84	0.79	0.85	0.85	0.85
48812.50	1.15	1.10	1.09	1.00	1.14	1.13	1.13	0.85	0.85	0.84	0.79	0.85	0.85	0.85
48811.50	1.15	1.10	1.09	1.00	1.14	1.13	1.13	0.85	0.85	0.84	0.79	0.85	0.85	0.85
48810.50	1.15	1.10	1.09	1.00	1.14	1.13	1.13	0.86	0.85	0.84	0.79	0.85	0.85	0.85
48809.50	1.15	1.10	1.09	1.00	1.14	1.13	1.13	0.86	0.85	0.85	0.79	0.85	0.85	0.85
48808.50	1.15	1.10	1.09	1.00	1.14	1.13	1.13	0.86	0.85	0.85	0.79	0.85	0.85	0.85
48807.50	1.15	1.10	1.09	1.00	1.14	1.13	1.13	0.86	0.86	0.85	0.79	0.85	0.85	0.85
48806.50	1.15	1.10	1.09	1.00	1.14	1.13	1.13	0.86	0.86	0.85	0.79	0.85	0.85	0.85
48805.50	1.15	1.10	1.09	1.00	1.14	1.13	1.13	0.86	0.86	0.85	0.79	0.85	0.85	0.85
48804.50	1.15	1.10	1.09	1.00	1.14	1.13	1.13	0.86	0.86	0.85	0.79	0.85	0.85	0.85
48803.50	1.15	1.10	1.09	1.00	1.14	1.13	1.13	0.86	0.86	0.85	0.79	0.86	0.85	0.85
48802.50	1.15	1.10	1.09	1.00	1.14	1.13	1.13	0.86	0.86	0.85	0.79	0.86	0.86	0.85
48801.50	1.15	1.10	1.09	1.00	1.14	1.13	1.13	0.86	0.86	0.85	0.79	0.86	0.86	0.85
48800.50	1.15	1.10	1.09	1.00	1.14	1.13	1.13	0.86	0.86	0.85	0.79	0.86	0.86	0.86
48799.50	1.15	1.10	1.09	1.00	1.14	1.13	1.13	0.86	0.86	0.85	0.79	0.86	0.86	0.86
48798.50	1.15	1.10	1.09	1.00	1.14	1.13	1.13	0.86	0.86	0.85	0.79	0.86	0.86	0.86
48797.50	1.15	1.10	1.09	1.00	1.14	1.13	1.13	0.87	0.86	0.85	0.79	0.86	0.86	0.86
48796.50	1.15	1.10	1.09	1.00	1.14	1.13	1.13	0.87	0.86	0.85	0.80	0.86	0.86	0.86
48795.50	1.15	1.10	1.09	1.00	1.14	1.13	1.13	0.87	0.86	0.85	0.80	0.86	0.86	0.86
48794.50	1.15	1.10	1.09	1.00	1.14	1.12	1.13	0.87	0.86	0.85	0.80	0.86	0.86	0.86
48793.50	1.15	1.10	1.09	1.00	1.14	1.12	1.13	0.87	0.86	0.85	0.80	0.86	0.86	0.86
48792.50	1.15	1.10	1.09	1.00	1.14	1.12	1.13	0.87	0.86	0.86	0.80	0.86	0.86	0.86
48791.50	1.15	1.10	1.09	1.00	1.14	1.12	1.13	0.87	0.87	0.86	0.80	0.86	0.86	0.86
48790.50	1.15	1.10	1.09	1.00	1.14	1.12	1.13	0.87	0.87	0.86	0.80	0.87	0.86	0.86
48789.50	1.15	1.10	1.09	1.00	1.14	1.12	1.13	0.87	0.87	0.86	0.80	0.87	0.86	0.86
48788.50	1.15	1.10	1.09	1.00	1.14	1.12	1.13	0.87	0.87	0.86	0.80	0.87	0.86	0.86
48787.50	1.15	1.10	1.09	1.00	1.14	1.12	1.13	0.87	0.87	0.86	0.80	0.87	0.86	0.86
48786.50	1.15	1.10	1.09	1.00	1.14	1.12	1.13	0.87	0.87	0.86	0.80	0.87	0.86	0.86
48785.50	1.15	1.10	1.09	1.00	1.14	1.12	1.13	0.87	0.87	0.86	0.80	0.87	0.87	0.87
48784.50	1.15	1.10	1.09	1.00	1.14	1.12	1.13	0.87	0.87	0.86	0.80	0.87	0.87	0.87
48783.50	1.15	1.10	1.09	1.00	1.14	1.12	1.13	0.88	0.87	0.86	0.80	0.87	0.87	0.87
48782.50	1.15	1.10	1.09	1.00	1.14	1.12	1.13	0.88	0.87	0.86	0.80	0.87	0.87	0.87
48781.50	1.15	1.10	1.09	1.00	1.14	1.12	1.13	0.88	0.87	0.86	0.80	0.87	0.87	0.87
48780.50	1.15	1.10	1.09	1.00	1.14	1.12	1.13	0.88	0.87	0.86	0.80	0.87	0.87	0.87
48779.50	1.15	1.10	1.09	1.00	1.14	1.12	1.13	0.88	0.87	0.86	0.80	0.87	0.87	0.87
48778.50	1.15	1.10	1.09	1.00	1.14	1.12	1.13	0.88	0.87	0.86	0.80	0.87	0.87	0.87
48777.50	1.15	1.10	1.09	1.00	1.14	1.12	1.13	0.88	0.87	0.86	0.80	0.87	0.87	0.87
48776.50	1.15	1.10	1.09	1.00	1.14	1.12	1.13	0.88	0.87	0.86	0.81	0.87	0.87	0.87
48775.50	1.15	1.10	1.09	1.00	1.14	1.12	1.13	0.88	0.87	0.86	0.81	0.88	0.87	0.87
48774.50	1.15	1.10	1.09	1.00	1.14	1.12	1.13	0.88	0.87	0.87	0.81	0.88	0.87	0.87
48773.50	1.15	1.10	1.09	1.00	1.14	1.12	1.13	0.88	0.88	0.87	0.81	0.88	0.87	0.87
48772.50	1.15	1.10	1.09	1.00	1.14	1.12	1.13	0.88	0.88	0.87	0.81	0.88	0.87	0.87
48771.50	1.15	1.10	1.09	1.00	1.14	1.12	1.13	0.88	0.88	0.87	0.81	0.88	0.87	0.87
48770.50	1.15	1.10	1.09	1.00	1.14	1.12	1.13	0.88	0.88	0.87	0.81	0.88	0.87	0.87
48769.50	1.15	1.10	1.08	1.00	1.14	1.12	1.13	0.89	0.88	0.87	0.81	0.88	0.87	0.87
48768.50	1.15	1.10	1.08	1.00	1.14	1.12	1.13	0.89	0.88	0.87	0.81	0.88	0.87	0.88
48767.50	1.15	1.10	1.08	1.00	1.14	1.12	1.13	0.89	0.88	0.87	0.81	0.88	0.88	0.88
48766.50	1.15	1.10	1.08	1.00	1.14	1.12	1.13	0.89	0.88	0.87	0.81	0.88	0.88	0.88
48765.50	1.15	1.10	1.08	1.00	1.14	1.12	1.13	0.89	0.88	0.87	0.81	0.88	0.88	0.88
48764.50	1.15	1.10	1.08	1.00	1.14	1.12	1.13	0.89	0.88	0.87	0.81	0.88	0.88	0.88
48763.50	1.15	1.10	1.08	1.00	1.14	1.12	1.13	0.89	0.88	0.87	0.81	0.88	0.88	0.88
48762.50	1.15	1.10	1.08	1.00	1.14	1.12	1.13	0.89	0.88	0.87	0.81	0.88	0.88	0.88
48761.50	1.15	1.10	1.08	1.00	1.14	1.12	1.13	0.89	0.88	0.87	0.81	0.88	0.88	0.88
48760.50	1.15	1.10	1.08	1.00	1.14	1.12	1.13	0.89	0.88	0.87	0.81	0.89	0.88	0.88
48759.50	1.15	1.10	1.08	1.00	1.14	1.12	1.13	0.89	0.88	0.87	0.81	0.89	0.88	0.88
48758.50	1.15	1.10	1.08	1.00	1.14	1.12	1.13	0.89	0.88	0.87	0.81	0.89	0.88	0.88
48757.50	1.15	1.10	1.08	1.00	1.14	1.12	1.13	0.89	0.88	0.87	0.81	0.89	0.88	0.88
48756.50	1.15	1.10	1.08	1.00	1.14	1.12	1.13	0.89	0.88	0.87	0.81	0.89	0.88	0.88
48755.50	1.15	1.10	1.08	1.00	1.14	1.12	1.13	0.89	0.88	0.87	0.81	0.89	0.88	0.88
48754.50	1.15	1.10	1.08	1.00	1.14	1.12	1.13	0.89	0.88	0.87	0.81	0.89	0.88	0.88
48753.50	1.15	1.10	1.08	1.00	1.14	1.12	1.13	0.90	0.89	0.88	0.82	0.89	0.88	0.88
48752.50	1.15	1.10	1.08	1.00	1.14	1.12	1.13	0.90	0.89	0.88	0.82	0.89	0.88	0.88
48751.50	1.15	1.10	1.08	1.00	1.14	1.12	1.13	0.90	0.89	0.88	0.82	0.89	0.88	0.89
48750.50	1.15	1.10	1.08	1.00	1.14	1.12	1.13	0.90	0.89	0.88	0.82	0.89	0.88	0.89
48749.50	1.15	1.10	1.08	1.00	1.14	1.12	1.13	0.90	0.89	0.88	0.82	0.89	0.88	0.89
48748.50	1.15	1.10	1.08	1.00	1.14	1.12	1.13	0.90	0.89	0.88	0.82	0.89	0.88	0.89
48747.50	1.15	1.10	1.08	1.00	1.14	1.12	1.13	0.90	0.89	0.88	0.82	0.89	0.88	0.89
48746.50	1.15	1.10	1.08	1.00	1.14	1.12	1.13	0.90	0.89	0.88	0.82	0.89	0.89	0.89
48745.50	1.15	1.10	1.08	1.00	1.14	1.12	1.13	0.90	0.89	0.88	0.82	0.89	0.89	0.89
48744.50	1.15	1.10	1.08	1.00	1.14	1.12	1.13	0.90	0.89	0.88	0.82	0.89	0.89	0.89
48743.50	1.15	1.10	1.08	1.00	1.14	1.12	1.13	0.90	0.89	0.88	0.82	0.89	0.89	0.89
48742.50	1.15	1.10	1.08	1.00	1.14	1.12	1.13	0.90	0.89	0.88	0.82	0.90	0.89	0.89
48741.50	1.15	1.10	1.08	1.00	1.14	1.12	1.13	0.90	0.89	0.88	0.82	0.90	0.89	0.89
48740.50	1.15	1.10	1.08	1.00	1.14	1.12	1.13	0.90	0.89	0.88	0.82	0.90	0.89	0.89
48739.50	1.15	1.10	1.08	1.00	1.14	1.12	1.13	0.90	0.89	0.88	0.82	0.90	0.89	0.89
48738.50	1.15	1.10	1.08	1.00	1.14	1.12	1.13	0.90	0.89	0.88	0.82	0.90	0.89	0.89
48737.50	1.15	1.10	1.08	1.00	1.14	1.12	1.13	0.90	0.89	0.88	0.82	0.90	0.89	0.89
48736.50	1.15	1.10	1.08	1.00	1.14	1.12	1.13	0.91	0.89	0.88	0.82	0.90	0.89	0.89
48735.50	1.15	1.10	1.08	1.00	1.14	1.12	1.13	0.91	0.89	0.88	0.82	0.90	0.89	0.89
48734.50	1.15	1.10	1.08	1.00	1.14	1.12	1.13	0.91	0.89	0.88	0.82	0.90	0.89	0.89
48733.50	1.15	1.10	1.08	1.00	1.14	1.12	1.13	0.91	0.89	0.88	0.82	0.90	0.89	0.89
48732.50	1.15	1.10	1.08	1.00	1.14	1.12	1.13	0.91	0.89	0.88	0.82	0.90	0.89	0.89
48731.50	1.15	1.10	1.08	1.00	1.14	1.12	1.13	0.91	0.89	0.88	0.82	0.90	0.89	0.90
48730.50	1.15	1.10	1.08	1.00	1.14	1.12	1.13	0.91	0.90	0.88	0.82	0.90	0.89	0.90
48729.50	1.15	1.10	1.08	1.00	1.14	1.12	1.13	0.91	0.90	0.89	0.82	0.90	0.89	0.90
48728.50	1.15	1.10	1.08	1.00	1.14	1.12	1.13	0.91	0.90	0.89	0.82	0.90	0.89	0.90
48727.50	1.14	1.10	1.08	1.00	1.14	1.12	1.13	0.91	0.90	0.89	0.82	0.90	0.89	0.90
48726.50	1.14	1.10	1.08	1.00	1.14	1.12	1.13	0.91	0.90	0.89	0.82	0.90	0.89	0.90
48725.50	1.14	1.10	1.08	1.00	1.14	1.12	1.13	0.91	0.90	0.89	0.83	0.90	0.89	0.90
48724.50	1.14	1.10	1.08	1.00	1.14	1.12	1.13	0.91	0.90	0.89	0.83	0.90	0.89	0.90
48723.50	1.14	1.10	1.08	1.00	1.14	1.12	1.13	0.91	0.90	0.89	0.83	0.91	0.89	0.90
48722.50	1.14	1.10	1.08	1.00	1.14	1.12	1.13	0.91	0.90	0.89	0.83	0.91	0.89	0.90
48721.50	1.14	1.10	1.08	1.00	1.14	1.12	1.13	0.91	0.90	0.89	0.83	0.91	0.89	0.90
48720.50	1.14	1.10	1.08	1.00	1.14	1.12	1.13	0.91	0.90	0.89	0.83	0.91	0.90	0.90
48719.50	1.14	1.10	1.08	1.00	1.14	1.12	1.13	0.91	0.90	0.89	0.83	0.91	0.90	0.90
48718.50	1.14	1.10	1.08	1.00	1.14	1.12	1.13	0.91	0.90	0.89	0.83	0.91	0.90	0.90
48717.50	1.14	1.10	1.08	1.00	1.14	1.12	1.13	0.91	0.90	0.89	0.83	0.91	0.90	0.90
48716.50	1.14	1.10	1.08	1.00	1.14	1.12	1.13	0.92	0.90	0.89	0.83	0.91	0.90	0.90
48715.50	1.14	1.10	1.08	1.00	1.14	1.11	1.13	0.92	0.90	0.89	0.83	0.91	0.90	0.90
48714.50	1.14	1.10	1.08	1.00	1.14	1.11	1.13	0.92	0.90	0.89	0.83	0.91	0.90	0.90
48713.50	1.14	1.10	1.08	1.00	1.14	1.11	1.13	0.92	0.90	0.89	0.83	0.91	0.90	0.90
48712.50	1.14	1.10	1.08	1.00	1.14	1.11	1.13	0.92	0.90	0.89	0.83	0.91	0.90	0.90
48711.50	1.14	1.10	1.08	1.00	1.14	1.11	1.13	0.92	0.90	0.89	0.83	0.91	0.90	0.90
48710.50	1.14	1.10	1.08	1.00	1.14	1.11	1.13	0.92	0.90	0.89	0.83	0.91	0.90	0.90
48709.50	1.14	1.10	1.08	1.00	1.14	1.11	1.13	0.92	0.90	0.89	0.83	0.91	0.90	0.90
48708.50	1.14	1.10	1.08	1.00	1.14	1.11	1.13	0.92	0.90	0.89	0.83	0.91	0.90	0.90
48707.50	1.14	1.10	1.08	1.00	1.14	1.11	1.13	0.92	0.90	0.89	0.83	0.91	0.90	0.91
48706.50	1.14	1.10	1.08	1.00	1.14	1.11	1.13	0.92	0.90	0.89	0.83	0.91	0.90	0.91
48705.50	1.14	1.10	1.08	1.00	1.14	1.11	1.13	0.92	0.90	0.89	0.83	0.91	0.90	0.91
48704.50	1.14	1.10	1.08	1.00	1.14	1.11	1.13	0.92	0.90	0.89	0.83	0.91	0.90	0.91
48703.50	1.14	1.10	1.08	1.00	1.14	1.11	1.13	0.92	0.90	0.89	0.83	0.91	0.90	0.91
48702.50	1.14	1.10	1.08	1.00	1.14	1.11	1.13	0.92	0.90	0.89	0.83	0.91	0.90	0.91
48701.50	1.14	1.10	1.08	1.00	1.14	1.11	1.13	0.92	0.90	0.89	0.83	0.91	0.90	0.91
48700.50	1.14	1.10	1.08	1.00	1.14	1.11	1.13	0.92	0.91	0.89	0.83	0.92	0.90	0.91
48699.50	1.14	1.10	1.08	1.00	1.14	1.11	1.12	0.92	0.91	0.89	0.83	0.92	0.90	0.91
48698.50	1.14	1.10	1.08	1.00	1.14	1.11	1.12	0.92	0.91	0.89	0.83	0.92	0.90	0.91
48697.50	1.14	1.10	1.08	1.00	1.14	1.11	1.12	0.92	0.91	0.89	0.83	0.92	0.90	0.91
48696.50	1.14	1.10	1.08	1.00	1.14	1.11	1.12	0.92	0.91	0.90	0.83	0.92	0.90	0.91
48695.50	1.14	1.10	1.08	1.00	1.14	1.11	1.12	0.92	0.91	0.90	0.83	0.92	0.90	0.91
48694.50	1.14	1.10	1.08	1.00	1.14	1.11	1.12	0.92	0.91	0.90	0.83	0.92	0.90	0.91
48693.50	1.14	1.10	1.08	1.00	1.14	1.11	1.12	0.92	0.91	0.90	0.83	0.92	0.90	0.91
48692.50	1.14	1.10	1.08	1.00	1.14	1.11	1.12	0.93	0.91	0.90	0.83	0.92	0.90	0.91
48691.50	1.14	1.10	1.08	1.00	1.14	1.11	1.12	0.93	0.91	0.90	0.83	0.92	0.90	0.91
48690.50	1.14	1.10	1.08	1.00	1.14	1.11	1.12	0.93	0.91	0.90	0.83	0.92	0.90	0.91
48689.50	1.14	1.10	1.08	1.00	1.14	1.11	1.12	0.93	0.91	0.90	0.83	0.92	0.90	0.91
48688.50	1.14	1.10	1.08	1.00	1.14	1.11	1.12	0.93	0.91	0.90	0.83	0.92	0.90	0.91
48687.50	1.14	1.10	1.08	1.00	1.14	1.11	1.12	0.93	0.91	0.90	0.83	0.92	0.90	0.91
48686.50	1.14	1.10	1.08	1.00	1.14	1.11	1.12	0.93	0.91	0.90	0.83	0.92	0.90	0.91
48685.50	1.14	1.10	1.08	1.00	1.14	1.11	1.12	0.93	0.91	0.90	0.83	0.92	0.90	0.91
48684.50	1.14	1.10	1.08	1.00	1.14	1.11	1.12	0.93	0.91	0.90	0.84	0.92	0.90	0.91
48683.50	1.14	1.10	1.08	1.00	1.14	1.11	1.12	0.93	0.91	0.90	0.84	0.92	0.91	0.91
48682.50	1.14	1.10	1.08	1.00	1.14	1.11	1.12	0.93	0.91	0.90	0.84	0.92	0.91	0.91
48681.50	1.14	1.10	1.08	1.00	1.14	1.11	1.12	0.93	0.91	0.90	0.84	0.92	0.91	0.91
48680.50	1.14	1.10	1.08	1.00	1.14	1.11	1.12	0.93	0.91	0.90	0.84	0.92	0.91	0.91
48679.50	1.14	1.10	1.08	1.00	1.14	1.11	1.12	0.93	0.91	0.90	0.84	0.92	0.91	0.91
48678.50	1.14	1.10	1.08	1.00	1.14	1.11	1.12	0.93	0.91	0.90	0.84	0.92	0.91	0.91
48677.50	1.14	1.10	1.08	1.00	1.14	1.11	1.12	0.93	0.91	0.90	0.84	0.92	0.91	0.91
48676.50	1.14	1.10	1.08	1.00	1.14	1.11	1.12	0.93	0.91	0.90	0.84	0.92	0.91	0.91
48675.50	1.14	1.10	1.08	1.00	1.14	1.11	1.12	0.93	0.91	0.90	0.84	0.92	0.91	0.92
48674.50	1.14	1.10	1.08	1.00	1.14	1.11	1.12	0.93	0.91	0.90	0.84	0.92	0.91	0.92
48673.50	1.14	1.10	1.08	1.00	1.14	1.11	1.12	0.93	0.91	0.90	0.84	0.92	0.91	0.92
48672.50	1.14	1.10	1.08	1.00	1.14	1.11	1.12	0.93	0.91	0.90	0.84	0.92	0.91	0.92
48671.50	1.14	1.10	1.08	1.00	1.14	1.11	1.12	0.93	0.91	0.90	0.84	0.93	0.91	0.92
48670.50	1.14	1.10	1.08	1.00	1.14	1.11	1.12	0.93	0.91	0.90	0.84	0.93	0.91	0.92
48669.50	1.14	1.10	1.08	1.00	1.14	1.11	1.12	0.93	0.91	0.90	0.84	0.93	0.91	0.92
48668.50	1.14	1.10	1.08	1.00	1.14	1.11	1.12	0.93	0.91	0.90	0.84	0.93	0.91	0.92
48667.50	1.14	1.10	1.08	1.00	1.14	1.11	1.12	0.93	0.91	0.90	0.84	0.93	0.91	0.92
48666.50	1.14	1.10	1.08	1.00	1.14	1.11	1.12	0.93	0.91	0.90	0.84	0.93	0.91	0.92
48665.50	1.14	1.10	1.08	1.00	1.14	1.11	1.12	0.93	0.91	0.90	0.84	0.93	0.91	0.92
48664.50	1.14	1.10	1.08	1.00	1.14	1.11	1.12	0.93	0.91	0.90	0.84	0.93	0.91	0.92
48663.50	1.14	1.10	1.08	1.00	1.14	1.11	1.12	0.93	0.91	0.90	0.84	0.93	0.91	0.92
48662.50	1.14	1.10	1.08	1.00	1.14	1.11	1.12	0.93	0.91	0.90	0.84	0.93	0.91	0.92
48661.50	1.14	1.10	1.08	1.00	1.14	1.11	1.12	0.93	0.91	0.90	0.84	0.93	0.91	0.92
48660.50	1.14	1.10	1.08	1.00	1.14	1.11	1.12	0.93	0.91	0.90	0.84	0.93	0.91	0.92
48659.50	1.14	1.10	1.08	1.00	1.14	1.11	1.12	0.93	0.91	0.90	0.84	0.93	0.91	0.92
48658.50	1.14	1.10	1.08	1.00	1.14	1.11	1.12	0.94	0.91	0.90	0.84	0.93	0.91	0.92
48657.50	1.14	1.10	1.08	1.00	1.14	1.11	1.12	0.94	0.91	0.90	0.84	0.93	0.91	0.92
48656.50	1.14	1.10	1.08	1.00	1.14	1.11	1.12	0.94	0.91	0.90	0.84	0.93	0.91	0.92
48655.50	1.14	1.10	1.08	1.00	1.14	1.11	1.12	0.94	0.91	0.90	0.84	0.93	0.91	0.92
48654.50	1.14	1.10	1.08	1.00	1.14	1.11	1.12	0.94	0.91	0.90	0.84	0.93	0.91	0.92
48653.50	1.14	1.10	1.08	1.00	1.14	1.11	1.12	0.94	0.91	0.90	0.84	0.93	0.91	0.92
48652.50	1.14	1.10	1.08	1.00	1.14	1.11	1.12	0.94	0.91	0.90	0.84	0.93	0.91	0.92
48651.50	1.14	1.10	1.08	1.00	1.14	1.11	1.12	0.94	0.91	0.90	0.84	0.93	0.91	0.92
48650.50	1.14	1.10	1.08	1.00	1.14	1.11	1.12	0.94	0.91	0.90	0.84	0.93	0.91	0.92
48649.50	1.14	1.10	1.08	1.00	1.14	1.11	1.12	0.94	0.91	0.90	0.84	0.93	0.91	0.92
48648.50	1.14	1.10	1.08	1.00	1.14	1.11	1.12	0.94	0.91	0.90	0.84	0.93	0.91	0.92
48647.50	1.14	1.10	1.08	1.00	1.14	1.11	1.12	0.94	0.91	0.90	0.84	0.93	0.91	0.92
48646.50	1.14	1.10	1.08	1.00	1.14	1.11	1.12	0.94	0.91	0.90	0.84	0.93	0.91	0.92
48645.50	1.14	1.10	1.08	1.00	1.14	1.11	1.12	0.94	0.91	0.90	0.84	0.93	0.91	0.92
48644.50	1.14	1.09	1.08	1.00	1.14	1.11	1.12	0.94	0.91	0.90	0.84	0.93	0.91	0.92
48643.50	1.14	1.09	1.08	1.00	1.14	1.11	1.12	0.94	0.91	0.90	0.84	0.93	0.91	0.92
48642.50	1.14	1.09	1.08	1.00	1.14	1.11	1.12	0.94	0.91	0.90	0.84	0.93	0.91	0.92
48641.50	1.14	1.09	1.08	1.00	1.14	1.11	1.12	0.94	0.91	0.90	0.84	0.93	0.91	0.92
48640.50	1.14	1.09	1.08	1.00	1.14	1.10	1.12	0.94	0.91	0.90	0.84	0.93	0.91	0.92
48639.50	1.14	1.09	1.08	1.00	1.14	1.10	1.12	0.94	0.91	0.90	0.84	0.93	0.91	0.92
48638.50	1.14	1.09	1.08	1.00	1.14	1.10	1.12	0.94	0.91	0.90	0.84	0.93	0.91	0.92
48637.50	1.14	1.09	1.08	1.00	1.14	1.10	1.12	0.94	0.91	0.90	0.84	0.93	0.91	0.92
48636.50	1.14	1.09	1.08	1.00	1.14	1.10	1.12	0.94	0.91	0.90	0.84	0.93	0.91	0.92
48635.50	1.14	1.09	1.08	1.00	1.14	1.10	1.12	0.94	0.91	0.90	0.84	0.93	0.91	0.92
48634.50	1.14	1.09	1.08	1.00	1.14	1.10	1.12	0.94	0.91	0.90	0.84	0.93	0.91	0.92
48633.50	1.14	1.09	1.08	1.00	1.14	1.10	1.12	0.94	0.91	0.90	0.84	0.93	0.91	0.92
48632.50	1.14	1.09	1.08	1.00	1.14	1.10	1.12	0.94	0.91	0.90	0.84	0.93	0.91	0.92
48631.50	1.14	1.09	1.08	1.00	1.14	1.10	1.12	0.94	0.91	0.90	0.84	0.93	0.91	0.92
48630.50	1.14	1.09	1.08	1.00	1.14	1.10	1.12	0.94	0.91	0.90	0.84	0.93	0.91	0.92
48629.50	1.14	1.09	1.08	1.00	1.14	1.10	1.12	0.94	0.91	0.90	0.84	0.93	0.91	0.92
48628.50	1.14	1.09	1.08	1.00	1.14	1.10	1.12	0.94	0.91	0.90	0.84	0.93	0.91	0.92
48627.50	1.14	1.09	1.08	1.00	1.14	1.10	1.12	0.94	0.91	0.90	0.84	0.93	0.91	0.92
48626.50	1.14	1.09	1.08	1.00	1.14	1.10	1.12	0.94	0.91	0.90	0.84	0.93	0.91	0.92
48625.50	1.14	1.09	1.08	1.00	1.14	1.10	1.12	0.94	0.91	0.90	0.84	0.93	0.91	0.92
48624.50	1.14	1.09	1.08	1.00	1.14	1.10	1.12	0.94	0.91	0.90	0.84	0.93	0.91	0.92
48623.50	1.14	1.09	1.08	1.00	1.14	1.10	1.12	0.94	0.91	0.90	0.84	0.93	0.91	0.92
48622.50	1.14	1.09	1.08	1.00	1.14	1.10	1.12	0.94	0.91	0.90	0.84	0.93	0.91	0.92
48621.50	1.14	1.09	1.08	1.00	1.14	1.10	1.12	0.94	0.91	0.90	0.84	0.93	0.91	0.92
48620.50	1.14	1.09	1.08	1.00	1.14	1.10	1.12	0.94	0.91	0.90	0.84	0.93	0.91	0.92
48619.50	1.14	1.09	1.08	1.00	1.14	1.10	1.12	0.94	0.91	0.90	0.84	0.93	0.91	0.92
48618.50	1.14	1.09	1.08	1.00	1.14	1.10	1.12	0.94	0.91	0.90	0.84	0.93	0.91	0.92
48617.50	1.14	1.09	1.08	1.00	1.14	1.10	1.12	0.94	0.91	0.90	0.84	0.93	0.91	0.92
48616.50	1.14	1.09	1.08	1.00	1.14	1.10	1.12	0.94	0.91	0.90	0.84	0.93	0.91	0.92
48615.50	1.14	1.09	1.08	1.00	1.14	1.10	1.12	0.94	0.91	0.90	0.84	0.93	0.91	0.92
48614.50	1.14	1.09	1.08	1.00	1.14	1.10	1.12	0.94	0.91	0.90	0.84	0.93	0.91	0.92
48613.50	1.14	1.09	1.08	1.00	1.14	1.10	1.12	0.94	0.91	0.90	0.84	0.93	0.91	0.92
48612.50	1.14	1.09	1.08	1.00	1.14	1.10	1.12	0.94	0.91	0.90	0.84	0.93	0.91	0.92
48611.50	1.14	1.09	1.08	1.00	1.14	1.10	1.12	0.94	0.91	0.90	0.84	0.93	0.91	0.92
48610.50	1.14	1.09	1.08	1.00	1.14	1.10	1.12	0.94	0.91	0.90	0.84	0.93	0.91	0.92
48609.50	1.14	1.09	1.08	1.00	1.14	1.10	1.12	0.94	0.91	0.90	0.84	0.93	0.91	0.92
48608.50	1.14	1.09	1.08	1.00	1.14	1.10	1.12	0.94	0.91	0.90	0.84	0.93	0.91	0.92
48607.50	1.14	1.09	1.08	1.00	1.14	1.10	1.12	0.94	0.91	0.90	0.84	0.93	0.91	0.92
48606.50	1.14	1.09	1.08	1.00	1.14	1.10	1.12	0.94	0.91	0.90	0.84	0.93	0.91	0.92
48605.50	1.14	1.09	1.08	1.00	1.14	1.10	1.12	0.94	0.91	0.90	0.84	0.93	0.91	0.92
48604.50	1.14	1.09	1.08	1.00	1.14	1.10	1.12	0.94	0.91	0.90	0.84	0.93	0.91	0.92
48603.50	1.14	1.09	1.08	1.00	1.14	1.10	1.12	0.94	0.91	0.90	0.84	0.93	0.91	0.92
48602.50	1.14	1.09	1.08	1.00	1.14	1.10	1.12	0.94	0.91	0.90	0.84	0.93	0.91	0.92
48601.50	1.14	1.09	1.08	1.00	1.14	1.10	1.12	0.94	0.91	0.90	0.84	0.93	0.91	0.92
48600.50	1.14	1.09	1.08	1.00	1.14	1.10	1.12	0.94	0.91	0.90	0.84	0.93	0.91	0.92
48599.50	1.14	1.09	1.08	1.00	1.14	1.10	1.12	0.94	0.91	0.90	0.84	0.93	0.91	0.92
48598.50	1.14	1.09	1.08	1.00	1.14	1.10	1.12	0.94	0.91	0.90	0.84	0.93	0.91	0.92
48597.50	1.14	1.09	1.08	1.00	1.14	1.10	1.12	0.94	0.91	0.90	0.84	0.93	0.91	0.92
48596.50	1.14	1.09	1.08	1.00	1.14	1.10	1.12	0.94	0.91	0.90	0.84	0.93	0.91	0.92
48595.50	1.14	1.09	1.08	1.00	1.14	1.10	1.12	0.94	0.91	0.90	0.84	0.93	0.91	0.92
48594.50	1.14	1.09	1.08	1.00	1.14	1.10	1.12	0.94	0.91	0.90	0.84	0.93	0.91	0.92
48593.50	1.14	1.09	1.08	1.00	1.14	1.10	1.12	0.94	0.91	0.90	0.84	0.93	0.91	0.92
48592.50	1.14	1.09	1.08	1.00	1.14	1.10	1.12	0.94	0.91	0.90	0.84	0.93	0.91	0.92
48591.50	1.14	1.09	1.08	1.00	1.14	1.10	1.12	0.94	0.91	0.90	0.84	0.93	0.91	0.92
48590.50	1.14	1.09	1.08	1.00	1.14	1.10	1.12	0.94	0.91	0.90	0.84	0.93	0.91	0.92
48589.50	1.14	1.09	1.08	1.00	1.14	1.10	1.12	0.94	0.91	0.90	0.84	0.93	0.91	0.92
48588.50	1.14	1.09	1.08	1.00	1.14	1.10	1.12	0.94	0.91	0.90	0.84	0.93	0.90	0.92
48587.50	1.14	1.09	1.08	1.00	1.14	1.10	1.12	0.94	0.91	0.90	0.83	0.93	0.90	0.92
48586.50	1.14	1.09	1.08	1.00	1.14	1.10	1.12	0.94	0.91	0.90	0.83	0.93	0.90	0.92
48585.50	1.14	1.09	1.08	1.00	1.14	1.10	1.12	0.94	0.91	0.90	0.83	0.93	0.90	0.92
48584.50	1.14	1.09	1.08	1.00	1.14	1.10	1.12	0.94	0.91	0.90	0.83	0.93	0.90	0.92
48583.50	1.14	1.09	1.08	1.00	1.14	1.10	1.12	0.94	0.91	0.90	0.83	0.93	0.90	0.92
48582.50	1.14	1.09	1.08	1.00	1.14	1.10	1.12	0.94	0.91	0.90	0.83	0.93	0.90	0.92
48581.50	1.14	1.09	1.08	1.00	1.14	1.10	1.12	0.94	0.91	0.90	0.83	0.93	0.90	0.92
48580.50	1.14	1.09	1.08	1.00	1.14	1.10	1.12	0.94	0.91	0.90	0.83	0.93	0.90	0.92
48579.50	1.14	1.09	1.08	1.00	1.14	1.10	1.12	0.94	0.91	0.90	0.83	0.93	0.90	0.92
48578.50	1.14	1.09	1.08	1.00	1.14	1.10	1.12	0.94	0.91	0.90	0.83	0.93	0.90	0.92
48577.50	1.14	1.09	1.08	1.00	1.14	1.10	1.12	0.94	0.91	0.90	0.83	0.93	0.90	0.92
48576.50	1.14	1.09	1.08	1.00	1.14	1.10	1.12	0.94	0.91	0.90	0.83	0.93	0.90	0.92
48575.50	1.14	1.09	1.08	1.00	1.14	1.10	1.12	0.94	0.91	0.90	0.83	0.93	0.90	0.92
48574.50	1.14	1.09	1.08	1.00	1.14	1.10	1.12	0.94	0.91	0.90	0.83	0.93	0.90	0.92
48573.50	1.14	1.09	1.08	1.00	1.14	1.10	1.12	0.94	0.91	0.90	0.83	0.93	0.90	0.92
48572.50	1.14	1.09	1.08	1.00	1.14	1.10	1.12	0.94	0.91	0.90	0.83	0.93	0.90	0.92
48571.50	1.14	1.09	1.08	1.00	1.14	1.10	1.12	0.94	0.91	0.90	0.83	0.93	0.90	0.92
48570.50	1.14	1.09	1.08	1.00	1.14	1.10	1.12	0.94	0.91	0.90	0.83	0.93	0.90	0.92
48569.50	1.14	1.09	1.08	1.00	1.14	1.10	1.12	0.94	0.91	0.90	0.83	0.93	0.90	0.92
48568.50	1.14	1.09	1.08	1.00	1.14	1.10	1.12	0.94	0.91	0.90	0.83	0.93	0.90	0.92
48567.50	1.14	1.09	1.08	1.00	1.14	1.10	1.12	0.94	0.91	0.90	0.83	0.93	0.90	0.92
48566.50	1.14	1.09	1.08	1.00	1.14	1.10	1.12	0.94	0.91	0.90	0.83	0.93	0.90	0.92
48565.50	1.14	1.09	1.08	1.00	1.14	1.09	1.12	0.94	0.91	0.90	0.83	0.93	0.90	0.92
48564.50	1.14	1.09	1.08	1.00	1.14	1.09	1.12	0.94	0.91	0.90	0.83	0.93	0.90	0.92
48563.50	1.14	1.09	1.08	1.00	1.14	1.09	1.12	0.94	0.91	0.90	0.83	0.93	0.90	0.92
48562.50	1.14	1.09	1.08	1.00	1.14	1.09	1.12	0.94	0.91	0.90	0.83	0.93	0.90	0.92
48561.50	1.14	1.09	1.08	1.00	1.14	1.09	1.12	0.94	0.91	0.89	0.83	0.93	0.90	0.92
48560.50	1.14	1.09	1.08	1.00	1.14	1.09	1.12	0.94	0.91	0.89	0.83	0.93	0.90	0.92
48559.50	1.14	1.09	1.08	1.00	1.14	1.09	1.12	0.94	0.91	0.89	0.83	0.93	0.90	0.92
48558.50	1.14	1.09	1.08	1.00	1.14	1.09	1.12	0.94	0.91	0.89	0.83	0.93	0.90	0.92
48557.50	1.14	1.09	1.08	1.00	1.14	1.09	1.12	0.94	0.91	0.89	0.83	0.93	0.90	0.92
48556.50	1.14	1.09	1.08	1.00	1.14	1.09	1.12	0.93	0.91	0.89	0.83	0.93	0.90	0.92
48555.50	1.14	1.09	1.08	1.00	1.14	1.09	1.12	0.93	0.90	0.89	0.83	0.93	0.90	0.92
48554.50	1.14	1.09	1.08	1.00	1.14	1.09	1.12	0.93	0.90	0.89	0.83	0.93	0.90	0.92
48553.50	1.14	1.09	1.08	1.00	1.14	1.09	1.12	0.93	0.90	0.89	0.83	0.93	0.90	0.92
48552.50	1.14	1.09	1.08	1.00	1.14	1.09	1.12	0.93	0.90	0.89	0.83	0.93	0.90	0.92
48551.50	1.14	1.09	1.08	1.00	1.14	1.09	1.12	0.93	0.90	0.89	0.83	0.93	0.90	0.92
48550.50	1.14	1.09	1.08	1.00	1.14	1.09	1.12	0.93	0.90	0.89	0.83	0.93	0.90	0.92
48549.50	1.14	1.09	1.08	1.00	1.14	1.09	1.12	0.93	0.90	0.89	0.83	0.93	0.89	0.92
48548.50	1.14	1.09	1.08	1.00	1.14	1.09	1.12	0.93	0.90	0.89	0.83	0.93	0.89	0.92
48547.50	1.14	1.09	1.08	1.00	1.14	1.09	1.12	0.93	0.90	0.89	0.83	0.93	0.89	0.91
48546.50	1.14	1.09	1.08	1.00	1.14	1.09	1.12	0.93	0.90	0.89	0.83	0.93	0.89	0.91
48545.50	1.14	1.09	1.08	1.00	1.14	1.09	1.12	0.93	0.90	0.89	0.83	0.93	0.89	0.91
48544.50	1.14	1.09	1.08	1.00	1.14	1.09	1.12	0.93	0.90	0.89	0.83	0.93	0.89	0.91
48543.50	1.14	1.09	1.08	1.00	1.14	1.09	1.12	0.93	0.90	0.89	0.82	0.93	0.89	0.91
48542.50	1.14	1.09	1.08	1.00	1.14	1.09	1.12	0.93	0.90	0.89	0.82	0.93	0.89	0.91
48541.50	1.14	1.09	1.08	1.00	1.14	1.09	1.12	0.93	0.90	0.89	0.82	0.93	0.89	0.91
48540.50	1.14	1.09	1.08	1.00	1.14	1.09	1.12	0.93	0.90	0.89	0.82	0.93	0.89	0.91
48539.50	1.14	1.09	1.08	1.00	1.14	1.09	1.12	0.93	0.90	0.89	0.82	0.93	0.89	0.91
48538.50	1.14	1.09	1.08	1.00	1.14	1.09	1.12	0.93	0.90	0.89	0.82	0.93	0.89	0.91
48537.50	1.14	1.09	1.08	1.00	1.14	1.09	1.12	0.93	0.90	0.89	0.82	0.92	0.89	0.91
48536.50	1.14	1.09	1.08	1.00	1.14	1.09	1.12	0.93	0.90	0.89	0.82	0.92	0.89	0.91
48535.50	1.14	1.09	1.08	1.00	1.14	1.09	1.12	0.93	0.90	0.89	0.82	0.92	0.89	0.91
48534.50	1.14	1.09	1.08	1.00	1.14	1.09	1.12	0.93	0.90	0.89	0.82	0.92	0.89	0.91
48533.50	1.14	1.09	1.08	1.00	1.14	1.09	1.12	0.93	0.90	0.89	0.82	0.92	0.89	0.91
48532.50	1.14	1.09	1.08	1.00	1.14	1.09	1.12	0.93	0.90	0.89	0.82	0.92	0.89	0.91
48531.50	1.14	1.09	1.08	1.00	1.14	1.09	1.12	0.93	0.90	0.89	0.82	0.92	0.89	0.91
48530.50	1.14	1.09	1.08	1.00	1.14	1.09	1.12	0.93	0.90	0.89	0.82	0.92	0.89	0.91
48529.50	1.14	1.09	1.08	1.00	1.14	1.09	1.12	0.93	0.90	0.89	0.82	0.92	0.89	0.91
48528.50	1.14	1.09	1.08	1.00	1.14	1.09	1.12	0.93	0.90	0.89	0.82	0.92	0.89	0.91
48527.50	1.14	1.09	1.08	1.00	1.14	1.09	1.12	0.93	0.90	0.89	0.82	0.92	0.89	0.91
48526.50	1.14	1.09	1.08	1.00	1.14	1.09	1.12	0.93	0.90	0.88	0.82	0.92	0.89	0.91
48525.50	1.14	1.09	1.08	1.00	1.14	1.09	1.12	0.93	0.90	0.88	0.82	0.92	0.89	0.91
48524.50	1.14	1.09	1.08	1.00	1.14	1.09	1.12	0.93	0.90	0.88	0.82	0.92	0.89	0.91
48523.50	1.14	1.09	1.08	1.00	1.14	1.09	1.12	0.93	0.90	0.88	0.82	0.92	0.89	0.91
48522.50	1.14	1.09	1.08	1.00	1.14	1.09	1.12	0.93	0.89	0.88	0.82	0.92	0.89	0.91
48521.50	1.14	1.09	1.08	1.00	1.14	1.09	1.12	0.93	0.89	0.88	0.82	0.92	0.88	0.91
48520.50	1.14	1.09	1.08	1.00	1.14	1.09	1.12	0.93	0.89	0.88	0.82	0.92	0.88	0.91
48519.50	1.14	1.09	1.08	1.00	1.14	1.09	1.12	0.92	0.89	0.88	0.82	0.92	0.88	0.91
48518.50	1.14	1.09	1.08	1.00	1.14	1.09	1.12	0.92	0.89	0.88	0.82	0.92	0.88	0.91
48517.50	1.14	1.09	1.08	1.00	1.14	1.09	1.12	0.92	0.89	0.88	0.82	0.92	0.88	0.91
48516.50	1.14	1.09	1.08	1.00	1.14	1.09	1.12	0.92	0.89	0.88	0.82	0.92	0.88	0.91
48515.50	1.14	1.09	1.08	1.00	1.14	1.09	1.12	0.92	0.89	0.88	0.82	0.92	0.88	0.91
48514.50	1.14	1.09	1.08	1.00	1.14	1.09	1.12	0.92	0.89	0.88	0.82	0.92	0.88	0.91
48513.50	1.14	1.09	1.08	1.00	1.14	1.09	1.12	0.92	0.89	0.88	0.82	0.92	0.88	0.91
48512.50	1.14	1.09	1.08	1.00	1.14	1.09	1.12	0.92	0.89	0.88	0.81	0.92	0.88	0.90
48511.50	1.14	1.09	1.08	1.00	1.14	1.09	1.12	0.92	0.89	0.88	0.81	0.92	0.88	0.90
48510.50	1.14	1.09	1.08	1.00	1.14	1.09	1.12	0.92	0.89	0.88	0.81	0.92	0.88	0.90
48509.50	1.14	1.09	1.08	1.00	1.14	1.09	1.12	0.92	0.89	0.88	0.81	0.92	0.88	0.90
48508.50	1.14	1.09	1.08	1.00	1.14	1.09	1.12	0.92	0.89	0.88	0.81	0.92	0.88	0.90
48507.50	1.14	1.09	1.08	1.00	1.14	1.09	1.12	0.92	0.89	0.88	0.81	0.92	0.88	0.90
48506.50	1.14	1.09	1.08	1.00	1.14	1.09	1.12	0.92	0.89	0.88	0.81	0.92	0.88	0.90
48505.50	1.14	1.09	1.08	1.00	1.14	1.09	1.12	0.92	0.89	0.88	0.81	0.92	0.88	0.90
48504.50	1.14	1.09	1.08	1.00	1.14	1.09	1.12	0.92	0.89	0.88	0.81	0.91	0.88	0.90
48503.50	1.14	1.09	1.08	1.00	1.14	1.09	1.12	0.92	0.89	0.88	0.81	0.91	0.88	0.90
48502.50	1.14	1.09	1.08	1.00	1.14	1.09	1.12	0.92	0.89	0.88	0.81	0.91	0.88	0.90
48501.50	1.14	1.09	1.08	1.00	1.14	1.09	1.12	0.92	0.89	0.88	0.81	0.91	0.88	0.90
48500.50	1.14	1.09	1.08	1.00	1.14	1.09	1.12	0.92	0.89	0.88	0.81	0.91	0.88	0.90
48499.50	1.14	1.09	1.08	1.00	1.14	1.09	1.12	0.92	0.89	0.88	0.81	0.91	0.88	0.90
48498.50	1.14	1.09	1.08	1.00	1.14	1.09	1.12	0.92	0.89	0.87	0.81	0.91	0.88	0.90
48497.50	1.14	1.09	1.08	1.00	1.14	1.09	1.12	0.92	0.89	0.87	0.81	0.91	0.87	0.90
48496.50	1.14	1.09	1.08	1.00	1.14	1.09	1.12	0.92	0.89	0.87	0.81	0.91	0.87	0.90
48495.50	1.14	1.09	1.08	1.00	1.14	1.09	1.12	0.92	0.88	0.87	0.81	0.91	0.87	0.90
48494.50	1.14	1.09	1.08	1.00	1.14	1.09	1.12	0.92	0.88	0.87	0.81	0.91	0.87	0.90
48493.50	1.14	1.09	1.08	1.00	1.13	1.09	1.12	0.92	0.88	0.87	0.81	0.91	0.87	0.90
48492.50	1.14	1.09	1.08	1.00	1.13	1.09	1.12	0.92	0.88	0.87	0.81	0.91	0.87	0.90
48491.50	1.14	1.09	1.08	1.00	1.13	1.09	1.12	0.91	0.88	0.87	0.81	0.91	0.87	0.90
48490.50	1.14	1.09	1.08	1.00	1.13	1.09	1.12	0.91	0.88	0.87	0.81	0.91	0.87	0.90
48489.50	1.14	1.09	1.08	1.00	1.13	1.09	1.12	0.91	0.88	0.87	0.81	0.91	0.87	0.90
48488.50	1.14	1.09	1.08	1.00	1.13	1.09	1.12	0.91	0.88	0.87	0.81	0.91	0.87	0.90
48487.50	1.14	1.09	1.08	1.00	1.13	1.09	1.12	0.91	0.88	0.87	0.81	0.91	0.87	0.90
48486.50	1.14	1.09	1.08	1.00	1.13	1.09	1.12	0.91	0.88	0.87	0.80	0.91	0.87	0.90
48485.50	1.14	1.09	1.08	1.00	1.13	1.08	1.12	0.91	0.88	0.87	0.80	0.91	0.87	0.90
48484.50	1.14	1.09	1.08	1.00	1.13	1.08	1.12	0.91	0.88	0.87	0.80	0.91	0.87	0.89
48483.50	1.14	1.09	1.08	1.00	1.13	1.08	1.12	0.91	0.88	0.87	0.80	0.91	0.87	0.89
48482.50	1.14	1.09	1.08	1.00	1.13	1.08	1.12	0.91	0.88	0.87	0.80	0.91	0.87	0.89
48481.50	1.14	1.09	1.08	1.00	1.13	1.08	1.12	0.91	0.88	0.87	0.80	0.91	0.87	0.89
48480.50	1.14	1.09	1.08	1.00	1.13	1.08	1.12	0.91	0.88	0.87	0.80	0.91	0.87	0.89
48479.50	1.14	1.09	1.08	1.00	1.13	1.08	1.12	0.91	0.88	0.87	0.80	0.91	0.87	0.89
48478.50	1.14	1.09	1.08	1.00	1.13	1.08	1.12	0.91	0.88	0.87	0.80	0.91	0.87	0.89
48477.50	1.14	1.09	1.08	1.00	1.13	1.08	1.12	0.91	0.88	0.87	0.80	0.90	0.87	0.89
48476.50	1.14	1.09	1.08	1.00	1.13	1.08	1.12	0.91	0.88	0.87	0.80	0.90	0.87	0.89
48475.50	1.14	1.09	1.08	1.00	1.13	1.08	1.12	0.91	0.88	0.87	0.80	0.90	0.86	0.89
48474.50	1.14	1.09	1.08	1.00	1.13	1.08	1.12	0.91	0.88	0.87	0.80	0.90	0.86	0.89
48473.50	1.14	1.09	1.08	1.00	1.13	1.08	1.12	0.91	0.88	0.86	0.80	0.90	0.86	0.89
48472.50	1.14	1.09	1.08	1.00	1.13	1.08	1.12	0.91	0.88	0.86	0.80	0.90	0.86	0.89
48471.50	1.14	1.09	1.08	1.00	1.13	1.08	1.12	0.91	0.88	0.86	0.80	0.90	0.86	0.89
48470.50	1.14	1.09	1.08	1.00	1.13	1.08	1.12	0.91	0.87	0.86	0.80	0.90	0.86	0.89
48469.50	1.14	1.09	1.08	1.00	1.13	1.08	1.12	0.91	0.87	0.86	0.80	0.90	0.86	0.89
48468.50	1.14	1.09	1.08	1.00	1.13	1.08	1.12	0.91	0.87	0.86	0.80	0.90	0.86	0.89
48467.50	1.14	1.09	1.08	1.00	1.13	1.08	1.12	0.91	0.87	0.86	0.80	0.90	0.86	0.89
48466.50	1.14	1.09	1.08	1.00	1.13	1.08	1.12	0.90	0.87	0.86	0.80	0.90	0.86	0.89
48465.50	1.14	1.09	1.08	1.00	1.13	1.08	1.12	0.90	0.87	0.86	0.80	0.90	0.86	0.89
48464.50	1.14	1.09	1.08	1.00	1.13	1.08	1.12	0.90	0.87	0.86	0.80	0.90	0.86	0.89
48463.50	1.14	1.09	1.08	1.00	1.13	1.08	1.12	0.90	0.87	0.86	0.80	0.90	0.86	0.89
48462.50	1.14	1.09	1.08	1.00	1.13	1.08	1.12	0.90	0.87	0.86	0.80	0.90	0.86	0.89
48461.50	1.14	1.09	1.08	1.00	1.13	1.08	1.12	0.90	0.87	0.86	0.80	0.90	0.86	0.89
48460.50	1.14	1.09	1.08	1.00	1.13	1.08	1.12	0.90	0.87	0.86	0.79	0.90	0.86	0.89
48459.50	1.14	1.09	1.08	1.00	1.13	1.08	1.12	0.90	0.87	0.86	0.79	0.90	0.86	0.89
48458.50	1.14	1.09	1.08	1.00	1.13	1.08	1.12	0.90	0.87	0.86	0.79	0.90	0.86	0.88
48457.50	1.14	1.09	1.08	1.00	1.13	1.08	1.12	0.90	0.87	0.86	0.79	0.90	0.86	0.88
48456.50	1.14	1.09	1.08	1.00	1.13	1.08	1.12	0.90	0.87	0.86	0.79	0.90	0.86	0.88
48455.50	1.14	1.09	1.08	1.00	1.13	1.08	1.12	0.90	0.87	0.86	0.79	0.90	0.86	0.88
48454.50	1.14	1.09	1.08	1.00	1.13	1.08	1.12	0.90	0.87	0.86	0.79	0.90	0.85	0.88
48453.50	1.14	1.09	1.08	1.00	1.13	1.08	1.12	0.90	0.87	0.86	0.79	0.90	0.85	0.88
48452.50	1.14	1.09	1.08	1.00	1.13	1.08	1.12	0.90	0.87	0.86	0.79	0.89	0.85	0.88
48451.50	1.14	1.09	1.08	1.00	1.13	1.08	1.12	0.90	0.87	0.86	0.79	0.89	0.85	0.88
48450.50	1.14	1.09	1.08	1.00	1.13	1.08	1.12	0.90	0.87	0.86	0.79	0.89	0.85	0.88
48449.50	1.14	1.09	1.08	1.00	1.13	1.08	1.12	0.90	0.87	0.85	0.79	0.89	0.85	0.88
48448.50	1.14	1.09	1.08	1.00	1.13	1.08	1.12	0.90	0.87	0.85	0.79	0.89	0.85	0.88
48447.50	1.14	1.09	1.08	1.00	1.13	1.08	1.12	0.90	0.86	0.85	0.79	0.89	0.85	0.88
48446.50	1.14	1.09	1.08	1.00	1.13	1.08	1.12	0.90	0.86	0.85	0.79	0.89	0.85	0.88
48445.50	1.14	1.09	1.08	1.00	1.13	1.08	1.12	0.90	0.86	0.85	0.79	0.89	0.85	0.88
48444.50	1.14	1.09	1.08	1.00	1.13	1.08	1.12	0.90	0.86	0.85	0.79	0.89	0.85	0.88
48443.50	1.14	1.09	1.08	1.00	1.13	1.08	1.12	0.89	0.86	0.85	0.79	0.89	0.85	0.88
48442.50	1.14	1.09	1.08	1.00	1.13	1.08	1.12	0.89	0.86	0.85	0.79	0.89	0.85	0.88
48441.50	1.14	1.09	1.08	0.99	1.13	1.08	1.12	0.89	0.86	0.85	0.79	0.89	0.85	0.88
48440.50	1.14	1.09	1.08	0.99	1.13	1.08	1.12	0.89	0.86	0.85	0.79	0.89	0.85	0.88
48439.50	1.14	1.09	1.08	0.99	1.13	1.08	1.12	0.89	0.86	0.85	0.79	0.89	0.85	0.88
48438.50	1.14	1.09	1.08	0.99	1.13	1.08	1.12	0.89	0.86	0.85	0.79	0.89	0.85	0.88
48437.50	1.14	1.09	1.08	0.99	1.13	1.08	1.12	0.89	0.86	0.85	0.79	0.89	0.85	0.88
48436.50	1.14	1.09	1.08	0.99	1.13	1.08	1.12	0.89	0.86	0.85	0.79	0.89	0.85	0.88
48435.50	1.14	1.09	1.08	0.99	1.13	1.08	1.12	0.89	0.86	0.85	0.78	0.89	0.85	0.88
48434.50	1.14	1.09	1.08	0.99	1.13	1.08	1.12	0.89	0.86	0.85	0.78	0.89	0.85	0.88
48433.50	1.14	1.09	1.08	0.99	1.13	1.08	1.12	0.89	0.86	0.85	0.78	0.89	0.84	0.87
48432.50	1.14	1.09	1.08	0.99	1.13	1.08	1.12	0.89	0.86	0.85	0.78	0.89	0.84	0.87
48431.50	1.14	1.09	1.08	0.99	1.13	1.08	1.12	0.89	0.86	0.85	0.78	0.89	0.84	0.87
48430.50	1.14	1.09	1.08	0.99	1.13	1.08	1.12	0.89	0.86	0.85	0.78	0.89	0.84	0.87
48429.50	1.14	1.09	1.08	0.99	1.13	1.08	1.12	0.89	0.86	0.85	0.78	0.89	0.84	0.87
48428.50	1.14	1.09	1.08	0.99	1.13	1.08	1.12	0.89	0.86	0.85	0.78	0.89	0.84	0.87
48427.50	1.14	1.09	1.08	0.99	1.13	1.08	1.12	0.89	0.86	0.85	0.78	0.88	0.84	0.87
48426.50	1.14	1.09	1.08	0.99	1.13	1.08	1.12	0.89	0.86	0.85	0.78	0.88	0.84	0.87
48425.50	1.14	1.09	1.08	0.99	1.13	1.08	1.12	0.89	0.86	0.85	0.78	0.88	0.84	0.87
48424.50	1.14	1.09	1.08	0.99	1.13	1.08	1.12	0.89	0.86	0.84	0.78	0.88	0.84	0.87
48423.50	1.14	1.09	1.08	0.99	1.13	1.08	1.12	0.89	0.85	0.84	0.78	0.88	0.84	0.87
48422.50	1.14	1.09	1.08	0.99	1.13	1.08	1.12	0.89	0.85	0.84	0.78	0.88	0.84	0.87
48421.50	1.14	1.09	1.08	0.99	1.13	1.08	1.12	0.89	0.85	0.84	0.78	0.88	0.84	0.87
48420.50	1.14	1.09	1.08	0.99	1.13	1.08	1.12	0.89	0.85	0.84	0.78	0.88	0.84	0.87
48419.50	1.14	1.09	1.08	0.99	1.13	1.08	1.12	0.88	0.85	0.84	0.78	0.88	0.84	0.87
48418.50	1.14	1.09	1.08	0.99	1.13	1.08	1.12	0.88	0.85	0.84	0.78	0.88	0.84	0.87
48417.50	1.14	1.09	1.08	0.99	1.13	1.08	1.12	0.88	0.85	0.84	0.78	0.88	0.84	0.87
48416.50	1.14	1.09	1.08	0.99	1.13	1.08	1.12	0.88	0.85	0.84	0.78	0.88	0.84	0.87
48415.50	1.14	1.09	1.08	0.99	1.13	1.08	1.12	0.88	0.85	0.84	0.78	0.88	0.84	0.87
48414.50	1.14	1.09	1.08	0.99	1.13	1.08	1.12	0.88	0.85	0.84	0.78	0.88	0.84	0.87
48413.50	1.14	1.09	1.08	0.99	1.13	1.08	1.12	0.88	0.85	0.84	0.78	0.88	0.84	0.87
48412.50	1.14	1.09	1.08	0.99	1.13	1.08	1.12	0.88	0.85	0.84	0.78	0.88	0.84	0.87
48411.50	1.14	1.09	1.08	0.99	1.13	1.08	1.12	0.88	0.85	0.84	0.78	0.88	0.83	0.87
48410.50	1.14	1.09	1.08	0.99	1.13	1.08	1.12	0.88	0.85	0.84	0.78	0.88	0.83	0.87
48409.50	1.14	1.09	1.08	0.99	1.13	1.08	1.12	0.88	0.85	0.84	0.77	0.88	0.83	0.87
48408.50	1.14	1.09	1.08	0.99	1.13	1.08	1.12	0.88	0.85	0.84	0.77	0.88	0.83	0.86
48407.50	1.14	1.09	1.08	0.99	1.13	1.08	1.12	0.88	0.85	0.84	0.77	0.88	0.83	0.86
48406.50	1.14	1.09	1.08	0.99	1.13	1.08	1.12	0.88	0.85	0.84	0.77	0.88	0.83	0.86
48405.50	1.14	1.09	1.08	0.99	1.13	1.08	1.12	0.88	0.85	0.84	0.77	0.88	0.83	0.86
48404.50	1.14	1.09	1.08	0.99	1.13	1.08	1.12	0.88	0.85	0.84	0.77	0.88	0.83	0.86
48403.50	1.14	1.09	1.08	0.99	1.13	1.08	1.12	0.88	0.85	0.84	0.77	0.88	0.83	0.86
48402.50	1.14	1.09	1.08	0.99	1.13	1.08	1.12	0.88	0.85	0.84	0.77	0.88	0.83	0.86
48401.50	1.14	1.09	1.08	0.99	1.13	1.08	1.12	0.88	0.85	0.84	0.77	0.87	0.83	0.86
48400.50	1.14	1.09	1.08	0.99	1.13	1.08	1.12	0.88	0.85	0.84	0.77	0.87	0.83	0.86
48399.50	1.14	1.09	1.08	0.99	1.13	1.08	1.12	0.88	0.85	0.84	0.77	0.87	0.83	0.86
48398.50	1.14	1.09	1.08	0.99	1.13	1.08	1.12	0.88	0.85	0.83	0.77	0.87	0.83	0.86
48397.50	1.14	1.09	1.08	0.99	1.13	1.08	1.12	0.88	0.84	0.83	0.77	0.87	0.83	0.86
48396.50	1.14	1.09	1.08	0.99	1.13	1.08	1.12	0.88	0.84	0.83	0.77	0.87	0.83	0.86
48395.50	1.14	1.09	1.08	0.99	1.13	1.08	1.12	0.88	0.84	0.83	0.77	0.87	0.83	0.86
48394.50	1.14	1.09	1.08	0.99	1.13	1.08	1.12	0.87	0.84	0.83	0.77	0.87	0.83	0.86
48393.50	1.14	1.09	1.08	0.99	1.13	1.08	1.12	0.87	0.84	0.83	0.77	0.87	0.83	0.86
48392.50	1.14	1.09	1.08	0.99	1.13	1.08	1.12	0.87	0.84	0.83	0.77	0.87	0.83	0.86
48391.50	1.14	1.09	1.08	0.99	1.13	1.08	1.12	0.87	0.84	0.83	0.77	0.87	0.83	0.86
48390.50	1.14	1.09	1.08	0.99	1.13	1.07	1.12	0.87	0.84	0.83	0.77	0.87	0.83	0.86
48389.50	1.14	1.09	1.08	0.99	1.13	1.07	1.12	0.87	0.84	0.83	0.77	0.87	0.83	0.86
48388.50	1.14	1.09	1.08	0.99	1.13	1.07	1.12	0.87	0.84	0.83	0.77	0.87	0.83	0.86
48387.50	1.14	1.09	1.08	0.99	1.13	1.07	1.12	0.87	0.84	0.83	0.77	0.87	0.82	0.86
48386.50	1.14	1.09	1.08	0.99	1.13	1.07	1.12	0.87	0.84	0.83	0.77	0.87	0.82	0.86
48385.50	1.14	1.09	1.08	0.99	1.13	1.07	1.12	0.87	0.84	0.83	0.77	0.87	0.82	0.86
48384.50	1.14	1.09	1.08	0.99	1.13	1.07	1.12	0.87	0.84	0.83	0.77	0.87	0.82	0.86
48383.50	1.14	1.09	1.08	0.99	1.13	1.07	1.12	0.87	0.84	0.83	0.77	0.87	0.82	0.86
48382.50	1.14	1.09	1.08	0.99	1.13	1.07	1.12	0.87	0.84	0.83	0.77	0.87	0.82	0.86
48381.50	1.14	1.09	1.08	0.99	1.13	1.07	1.12	0.87	0.84	0.83	0.77	0.87	0.82	0.86
48380.50	1.14	1.09	1.08	0.99	1.13	1.07	1.12	0.87	0.84	0.83	0.77	0.87	0.82	0.86
48379.50	1.14	1.09	1.08	0.99	1.13	1.07	1.12	0.87	0.84	0.83	0.77	0.87	0.82	0.86
48378.50	1.14	1.09	1.08	0.99	1.13	1.07	1.12	0.87	0.84	0.83	0.76	0.87	0.82	0.85
48377.50	1.14	1.09	1.08	0.99	1.13	1.07	1.12	0.87	0.84	0.83	0.76	0.87	0.82	0.85
48376.50	1.14	1.09	1.08	0.99	1.13	1.07	1.12	0.87	0.84	0.83	0.76	0.87	0.82	0.85
48375.50	1.14	1.09	1.08	0.99	1.13	1.07	1.12	0.87	0.84	0.83	0.76	0.87	0.82	0.85
48374.50	1.14	1.09	1.08	0.99	1.13	1.07	1.12	0.87	0.84	0.83	0.76	0.87	0.82	0.85
48373.50	1.14	1.09	1.08	0.99	1.13	1.07	1.12	0.87	0.84	0.83	0.76	0.87	0.82	0.85
48372.50	1.14	1.09	1.08	0.99	1.13	1.07	1.12	0.87	0.84	0.83	0.76	0.87	0.82	0.85
48371.50	1.14	1.09	1.08	0.99	1.13	1.07	1.12	0.87	0.84	0.83	0.76	0.86	0.82	0.85
48370.50	1.14	1.09	1.08	0.99	1.13	1.07	1.12	0.87	0.84	0.83	0.76	0.86	0.82	0.85
48369.50	1.14	1.09	1.08	0.99	1.13	1.07	1.12	0.87	0.84	0.83	0.76	0.86	0.82	0.85
48368.50	1.14	1.09	1.08	0.99	1.13	1.07	1.12	0.87	0.84	0.83	0.76	0.86	0.82	0.85
48367.50	1.14	1.09	1.08	0.99	1.13	1.07	1.12	0.87	0.84	0.83	0.76	0.86	0.82	0.85
48366.50	1.14	1.09	1.08	0.99	1.13	1.07	1.12	0.87	0.84	0.82	0.76	0.86	0.82	0.85
48365.50	1.14	1.09	1.08	0.99	1.13	1.07	1.12	0.87	0.83	0.82	0.76	0.86	0.82	0.85
48364.50	1.14	1.09	1.08	0.99	1.13	1.07	1.12	0.87	0.83	0.82	0.76	0.86	0.82	0.85
48363.50	1.14	1.09	1.08	0.99	1.13	1.07	1.12	0.86	0.83	0.82	0.76	0.86	0.82	0.85
48362.50	1.14	1.09	1.08	0.99	1.13	1.07	1.12	0.86	0.83	0.82	0.76	0.86	0.82	0.85
48361.50	1.14	1.09	1.08	0.99	1.13	1.07	1.12	0.86	0.83	0.82	0.76	0.86	0.82	0.85
48360.50	1.14	1.09	1.08	0.99	1.13	1.07	1.12	0.86	0.83	0.82	0.76	0.86	0.82	0.85
48359.50	1.14	1.09	1.08	0.99	1.13	1.07	1.12	0.86	0.83	0.82	0.76	0.86	0.82	0.85
48358.50	1.14	1.09	1.08	0.99	1.13	1.07	1.12	0.86	0.83	0.82	0.76	0.86	0.82	0.85
48357.50	1.14	1.09	1.08	0.99	1.13	1.07	1.12	0.86	0.83	0.82	0.76	0.86	0.81	0.85
48356.50	1.14	1.09	1.08	0.99	1.13	1.07	1.12	0.86	0.83	0.82	0.76	0.86	0.81	0.85
48355.50	1.14	1.09	1.08	0.99	1.13	1.07	1.12	0.86	0.83	0.82	0.76	0.86	0.81	0.85
48354.50	1.14	1.09	1.08	0.99	1.13	1.07	1.12	0.86	0.83	0.82	0.76	0.86	0.81	0.85
48353.50	1.14	1.09	1.08	0.99	1.13	1.07	1.12	0.86	0.83	0.82	0.76	0.86	0.81	0.85
48352.50	1.14	1.09	1.08	0.99	1.13	1.07	1.12	0.86	0.83	0.82	0.76	0.86	0.81	0.85
48351.50	1.14	1.09	1.08	0.99	1.13	1.07	1.12	0.86	0.83	0.82	0.76	0.86	0.81	0.85
48350.50	1.14	1.09	1.08	0.99	1.13	1.07	1.12	0.86	0.83	0.82	0.76	0.86	0.81	0.85
48349.50	1.14	1.09	1.08	0.99	1.13	1.07	1.12	0.86	0.83	0.82	0.76	0.86	0.81	0.85
48348.50	1.14	1.09	1.08	0.99	1.13	1.07	1.12	0.86	0.83	0.82	0.76	0.86	0.81	0.85
48347.50	1.14	1.09	1.08	0.99	1.13	1.07	1.12	0.86	0.83	0.82	0.76	0.86	0.81	0.85
48346.50	1.14	1.09	1.08	0.99	1.13	1.07	1.12	0.86	0.83	0.82	0.76	0.86	0.81	0.85
48345.50	1.14	1.09	1.08	0.99	1.13	1.07	1.12	0.86	0.83	0.82	0.76	0.86	0.81	0.85
48344.50	1.14	1.09	1.08	0.99	1.13	1.07	1.12	0.86	0.83	0.82	0.76	0.86	0.81	0.85
48343.50	1.14	1.09	1.08	0.99	1.13	1.07	1.12	0.86	0.83	0.82	0.76	0.86	0.81	0.85
48342.50	1.14	1.09	1.08	0.99	1.13	1.07	1.12	0.86	0.83	0.82	0.76	0.86	0.81	0.85
48341.50	1.14	1.09	1.08	0.99	1.13	1.07	1.12	0.86	0.83	0.82	0.76	0.86	0.81	0.85
48340.50	1.14	1.09	1.08	0.99	1.13	1.07	1.12	0.86	0.83	0.82	0.76	0.86	0.81	0.85
48339.50	1.14	1.09	1.08	0.99	1.13	1.07	1.12	0.86	0.83	0.82	0.76	0.86	0.81	0.85
48338.50	1.14	1.09	1.08	0.99	1.13	1.07	1.12	0.86	0.83	0.82	0.76	0.86	0.81	0.85
48337.50	1.14	1.09	1.08	0.99	1.13	1.07	1.12	0.86	0.83	0.82	0.76	0.86	0.81	0.85
48336.50	1.14	1.09	1.08	0.99	1.13	1.07	1.12	0.86	0.83	0.82	0.76	0.86	0.81	0.85
48335.50	1.14	1.09	1.08	0.99	1.13	1.07	1.12	0.86	0.83	0.82	0.76	0.86	0.81	0.85
48334.50	1.14	1.09	1.08	0.99	1.13	1.07	1.12	0.86	0.83	0.82	0.76	0.86	0.81	0.85
48333.50	1.14	1.09	1.08	0.99	1.13	1.07	1.12	0.86	0.83	0.82	0.76	0.86	0.81	0.85
48332.50	1.14	1.09	1.08	0.99	1.13	1.07	1.12	0.86	0.83	0.82	0.76	0.86	0.81	0.84
48331.50	1.14	1.09	1.08	0.99	1.13	1.07	1.12	0.86	0.83	0.82	0.76	0.86	0.81	0.84
48330.50	1.14	1.09	1.08	0.99	1.13	1.07	1.12	0.86	0.83	0.82	0.76	0.86	0.81	0.84
48329.50	1.14	1.09	1.08	0.99	1.13	1.07	1.12	0.86	0.83	0.82	0.76	0.86	0.81	0.84
48328.50	1.14	1.09	1.08	0.99	1.13	1.07	1.12	0.86	0.83	0.82	0.76	0.86	0.81	0.84
48327.50	1.14	1.09	1.08	0.99	1.13	1.07	1.12	0.86	0.83	0.82	0.76	0.86	0.81	0.84
48326.50	1.14	1.09	1.08	0.99	1.13	1.07	1.12	0.86	0.83	0.82	0.76	0.86	0.81	0.84
48325.50	1.14	1.09	1.08	0.99	1.13	1.07	1.12	0.86	0.83	0.82	0.76	0.86	0.81	0.84
48324.50	1.14	1.09	1.08	0.99	1.13	1.07	1.12	0.86	0.83	0.82	0.76	0.86	0.81	0.84
48323.50	1.14	1.09	1.08	0.99	1.13	1.07	1.12	0.86	0.83	0.82	0.76	0.86	0.81	0.84
48322.50	1.14	1.09	1.08	0.99	1.13	1.07	1.12	0.86	0.83	0.82	0.75	0.86	0.81	0.84
48321.50	1.14	1.09	1.08	0.99	1.13	1.07	1.12	0.86	0.83	0.82	0.75	0.86	0.81	0.84
48320.50	1.14	1.09	1.08	0.99	1.13	1.07	1.12	0.86	0.83	0.82	0.75	0.86	0.81	0.84
48319.50	1.14	1.09	1.08	0.99	1.13	1.07	1.12	0.86	0.83	0.82	0.75	0.86	0.81	0.84
48318.50	1.14	1.09	1.08	0.99	1.13	1.07	1.12	0.86	0.83	0.82	0.75	0.86	0.81	0.84
48317.50	1.14	1.09	1.08	0.99	1.13	1.07	1.12	0.86	0.83	0.82	0.75	0.86	0.81	0.84
48316.50	1.14	1.09	1.08	0.99	1.13	1.07	1.12	0.86	0.83	0.82	0.75	0.86	0.81	0.84
48315.50	1.14	1.09	1.08	0.99	1.13	1.07	1.12	0.86	0.83	0.82	0.75	0.86	0.81	0.84
48314.50	1.14	1.09	1.08	0.99	1.13	1.07	1.12	0.86	0.83	0.82	0.75	0.86	0.81	0.84
48313.50	1.14	1.09	1.08	0.99	1.13	1.07	1.12	0.86	0.83	0.82	0.75	0.86	0.81	0.84
48312.50	1.14	1.09	1.08	0.99	1.13	1.07	1.12	0.86	0.83	0.82	0.75	0.86	0.81	0.84
48311.50	1.14	1.09	1.08	0.99	1.13	1.07	1.12	0.86	0.83	0.82	0.75	0.86	0.81	0.84
48310.50	1.14	1.09	1.08	0.99	1.13	1.07	1.12	0.86	0.83	0.82	0.75	0.86	0.81	0.84
48309.50	1.14	1.09	1.08	0.99	1.13	1.07	1.12	0.86	0.83	0.82	0.75	0.86	0.81	0.84
48308.50	1.14	1.09	1.08	0.99	1.13	1.07	1.12	0.86	0.83	0.82	0.75	0.86	0.81	0.84
48307.50	1.14	1.09	1.08	0.99	1.13	1.07	1.12	0.86	0.83	0.82	0.75	0.86	0.81	0.84
48306.50	1.14	1.09	1.08	0.99	1.13	1.07	1.12	0.86	0.83	0.82	0.75	0.86	0.81	0.84
48305.50	1.14	1.09	1.08	0.99	1.13	1.07	1.12	0.86	0.83	0.82	0.75	0.86	0.81	0.84
48304.50	1.14	1.09	1.08	0.99	1.13	1.07	1.12	0.86	0.83	0.82	0.75	0.86	0.81	0.84
48303.50	1.14	1.09	1.08	0.99	1.13	1.07	1.12	0.86	0.83	0.82	0.75	0.86	0.81	0.84
48302.50	1.14	1.09	1.08	0.99	1.13	1.07	1.12	0.86	0.83	0.82	0.75	0.86	0.81	0.84
48301.50	1.14	1.09	1.08	0.99	1.13	1.07	1.12	0.86	0.83	0.82	0.75	0.86	0.81	0.84
48300.50	1.14	1.09	1.08	0.99	1.13	1.07	1.12	0.86	0.83	0.82	0.76	0.86	0.81	0.84
48299.50	1.14	1.09	1.08	0.99	1.13	1.07	1.12	0.86	0.83	0.82	0.76	0.86	0.81	0.84
48298.50	1.14	1.09	1.08	0.99	1.13	1.07	1.12	0.86	0.83	0.82	0.76	0.86	0.81	0.84
48297.50	1.14	1.09	1.08	0.99	1.13	1.07	1.12	0.86	0.83	0.82	0.76	0.86	0.81	0.84
48296.50	1.14	1.09	1.08	0.99	1.13	1.07	1.12	0.86	0.83	0.82	0.76	0.86	0.81	0.84
48295.50	1.14	1.09	1.08	0.99	1.13	1.07	1.12	0.86	0.83	0.82	0.76	0.86	0.81	0.84
48294.50	1.14	1.09	1.08	0.99	1.13	1.07	1.12	0.86	0.83	0.82	0.76	0.86	0.81	0.84
48293.50	1.14	1.09	1.08	0.99	1.13	1.07	1.12	0.86	0.83	0.82	0.76	0.86	0.81	0.84
48292.50	1.14	1.09	1.08	0.99	1.13	1.07	1.12	0.86	0.83	0.82	0.76	0.86	0.81	0.84
48291.50	1.14	1.09	1.08	0.99	1.13	1.07	1.12	0.86	0.83	0.82	0.76	0.86	0.81	0.84
48290.50	1.14	1.09	1.08	0.99	1.13	1.07	1.12	0.86	0.83	0.82	0.76	0.86	0.81	0.85
48289.50	1.14	1.09	1.08	0.99	1.13	1.07	1.12	0.86	0.83	0.82	0.76	0.86	0.81	0.85
48288.50	1.14	1.09	1.08	0.99	1.13	1.07	1.12	0.86	0.83	0.82	0.76	0.86	0.81	0.85
48287.50	1.14	1.09	1.08	0.99	1.13	1.07	1.12	0.86	0.83	0.82	0.76	0.86	0.81	0.85
48286.50	1.14	1.09	1.08	0.99	1.13	1.07	1.12	0.86	0.83	0.82	0.76	0.86	0.81	0.85
48285.50	1.14	1.09	1.08	0.99	1.13	1.07	1.12	0.86	0.83	0.82	0.76	0.86	0.81	0.85
48284.50	1.14	1.09	1.08	0.99	1.13	1.07	1.12	0.86	0.83	0.82	0.76	0.86	0.81	0.85
48283.50	1.14	1.09	1.08	0.99	1.13	1.07	1.12	0.86	0.83	0.82	0.76	0.86	0.81	0.85
48282.50	1.14	1.09	1.08	0.99	1.13	1.07	1.12	0.86	0.83	0.82	0.76	0.86	0.81	0.85
48281.50	1.14	1.09	1.08	0.99	1.13	1.07	1.12	0.86	0.83	0.82	0.76	0.86	0.81	0.85
48280.50	1.14	1.09	1.08	0.99	1.13	1.07	1.12	0.86	0.83	0.82	0.76	0.86	0.81	0.85
48279.50	1.14	1.09	1.08	0.99	1.13	1.07	1.12	0.86	0.83	0.82	0.76	0.86	0.81	0.85
48278.50	1.14	1.09	1.08	0.99	1.13	1.07	1.12	0.86	0.83	0.82	0.76	0.86	0.81	0.85
48277.50	1.14	1.09	1.08	0.99	1.13	1.07	1.12	0.86	0.83	0.82	0.76	0.86	0.81	0.85
48276.50	1.14	1.09	1.08	0.99	1.13	1.07	1.12	0.86	0.83	0.82	0.76	0.86	0.81	0.85
48275.50	1.14	1.09	1.08	0.99	1.13	1.07	1.12	0.86	0.83	0.82	0.76	0.86	0.81	0.85
48274.50	1.14	1.09	1.08	0.99	1.13	1.07	1.12	0.86	0.83	0.82	0.76	0.86	0.81	0.85
48273.50	1.14	1.09	1.08	0.99	1.13	1.07	1.12	0.86	0.83	0.82	0.76	0.86	0.81	0.85
48272.50	1.14	1.09	1.08	0.99	1.13	1.07	1.12	0.86	0.83	0.82	0.76	0.86	0.81	0.85
48271.50	1.14	1.09	1.08	0.99	1.13	1.07	1.12	0.86	0.83	0.82	0.76	0.86	0.81	0.85
48270.50	1.14	1.09	1.08	0.99	1.13	1.07	1.12	0.86	0.83	0.82	0.76	0.86	0.81	0.85
48269.50	1.14	1.09	1.08	0.99	1.13	1.07	1.12	0.86	0.83	0.82	0.76	0.86	0.81	0.85
48268.50	1.14	1.09	1.08	0.99	1.13	1.07	1.12	0.86	0.83	0.82	0.76	0.86	0.81	0.85
48267.50	1.14	1.09	1.08	0.99	1.13	1.07	1.12	0.86	0.83	0.82	0.76	0.86	0.81	0.85
48266.50	1.14	1.09	1.08	0.99	1.13	1.07	1.12	0.86	0.83	0.82	0.76	0.86	0.81	0.85
48265.50	1.14	1.09	1.08	0.99	1.13	1.07	1.12	0.86	0.83	0.82	0.76	0.86	0.81	0.85
48264.50	1.14	1.09	1.08	0.99	1.13	1.07	1.12	0.87	0.83	0.82	0.76	0.86	0.81	0.85
48263.50	1.14	1.09	1.08	0.99	1.13	1.07	1.12	0.87	0.83	0.82	0.76	0.86	0.81	0.85
48262.50	1.14	1.09	1.08	0.99	1.13	1.07	1.12	0.87	0.83	0.82	0.76	0.86	0.81	0.85
48261.50	1.14	1.09	1.08	0.99	1.13	1.07	1.12	0.87	0.83	0.82	0.76	0.86	0.81	0.85
48260.50	1.14	1.09	1.08	0.99	1.13	1.07	1.12	0.87	0.83	0.82	0.76	0.86	0.81	0.85
48259.50	1.14	1.09	1.08	0.99	1.13	1.07	1.12	0.87	0.83	0.82	0.76	0.86	0.81	0.85
48258.50	1.14	1.09	1.08	0.99	1.13	1.07	1.12	0.87	0.84	0.83	0.76	0.86	0.81	0.85
48257.50	1.14	1.09	1.08	0.99	1.13	1.07	1.12	0.87	0.84	0.83	0.76	0.87	0.81	0.85
48256.50	1.14	1.09	1.08	0.99	1.13	1.07	1.12	0.87	0.84	0.83	0.76	0.87	0.81	0.85
48255.50	1.14	1.09	1.08	0.99	1.13	1.07	1.12	0.87	0.84	0.83	0.76	0.87	0.82	0.85
48254.50	1.14	1.09	1.08	0.99	1.13	1.07	1.12	0.87	0.84	0.83	0.76	0.87	0.82	0.85
48253.50	1.14	1.09	1.08	0.99	1.13	1.07	1.12	0.87	0.84	0.83	0.76	0.87	0.82	0.85
48252.50	1.14	1.09	1.08	0.99	1.13	1.07	1.12	0.87	0.84	0.83	0.76	0.87	0.82	0.85
48251.50	1.14	1.09	1.08	0.99	1.13	1.07	1.12	0.87	0.84	0.83	0.77	0.87	0.82	0.86
48250.50	1.14	1.09	1.08	0.99	1.13	1.07	1.12	0.87	0.84	0.83	0.77	0.87	0.82	0.86
48249.50	1.14	1.09	1.08	0.99	1.13	1.07	1.12	0.87	0.84	0.83	0.77	0.87	0.82	0.86
48248.50	1.14	1.09	1.08	0.99	1.13	1.06	1.12	0.87	0.84	0.83	0.77	0.87	0.82	0.86
48247.50	1.14	1.09	1.08	0.99	1.13	1.06	1.12	0.87	0.84	0.83	0.77	0.87	0.82	0.86
48246.50	1.14	1.09	1.08	0.99	1.13	1.06	1.12	0.87	0.84	0.83	0.77	0.87	0.82	0.86
48245.50	1.14	1.09	1.08	0.99	1.13	1.06	1.12	0.87	0.84	0.83	0.77	0.87	0.82	0.86
48244.50	1.14	1.09	1.08	0.99	1.13	1.06	1.12	0.87	0.84	0.83	0.77	0.87	0.82	0.86
48243.50	1.14	1.09	1.07	0.99	1.13	1.06	1.12	0.87	0.84	0.83	0.77	0.87	0.82	0.86
48242.50	1.14	1.09	1.07	0.99	1.13	1.06	1.12	0.87	0.84	0.83	0.77	0.87	0.82	0.86
48241.50	1.14	1.09	1.07	0.99	1.13	1.06	1.12	0.87	0.84	0.83	0.77	0.87	0.82	0.86
48240.50	1.14	1.09	1.07	0.99	1.13	1.06	1.12	0.88	0.84	0.83	0.77	0.87	0.82	0.86
48239.50	1.14	1.09	1.07	0.99	1.13	1.06	1.12	0.88	0.84	0.83	0.77	0.87	0.82	0.86
48238.50	1.14	1.09	1.07	0.99	1.13	1.06	1.12	0.88	0.84	0.83	0.77	0.87	0.82	0.86
48237.50	1.14	1.09	1.07	0.99	1.13	1.06	1.12	0.88	0.84	0.83	0.77	0.87	0.82	0.86
48236.50	1.14	1.09	1.07	0.99	1.13	1.06	1.12	0.88	0.84	0.83	0.77	0.87	0.82	0.86
48235.50	1.14	1.09	1.07	0.99	1.13	1.06	1.12	0.88	0.84	0.83	0.77	0.88	0.82	0.86
48234.50	1.14	1.09	1.07	0.99	1.13	1.06	1.12	0.88	0.84	0.83	0.77	0.88	0.82	0.86
48233.50	1.14	1.09	1.07	0.99	1.13	1.06	1.12	0.88	0.85	0.84	0.77	0.88	0.82	0.86
48232.50	1.14	1.09	1.07	0.99	1.13	1.06	1.12	0.88	0.85	0.84	0.77	0.88	0.82	0.86
48231.50	1.14	1.09	1.07	0.99	1.13	1.06	1.12	0.88	0.85	0.84	0.77	0.88	0.83	0.86
48230.50	1.14	1.09	1.07	0.99	1.13	1.06	1.12	0.88	0.85	0.84	0.77	0.88	0.83	0.87
48229.50	1.14	1.09	1.07	0.99	1.13	1.06	1.12	0.88	0.85	0.84	0.77	0.88	0.83	0.87
48228.50	1.14	1.09	1.07	0.99	1.13	1.06	1.12	0.88	0.85	0.84	0.78	0.88	0.83	0.87
48227.50	1.14	1.09	1.07	0.99	1.13	1.06	1.12	0.88	0.85	0.84	0.78	0.88	0.83	0.87
48226.50	1.14	1.09	1.07	0.99	1.13	1.06	1.12	0.88	0.85	0.84	0.78	0.88	0.83	0.87
48225.50	1.14	1.09	1.07	0.99	1.13	1.06	1.12	0.88	0.85	0.84	0.78	0.88	0.83	0.87
48224.50	1.14	1.09	1.07	0.99	1.13	1.06	1.12	0.88	0.85	0.84	0.78	0.88	0.83	0.87
48223.50	1.14	1.09	1.07	0.99	1.13	1.06	1.12	0.89	0.85	0.84	0.78	0.88	0.83	0.87
48222.50	1.14	1.09	1.07	0.99	1.13	1.06	1.12	0.89	0.85	0.84	0.78	0.88	0.83	0.87
48221.50	1.14	1.09	1.07	0.99	1.13	1.06	1.12	0.89	0.85	0.84	0.78	0.88	0.83	0.87
48220.50	1.14	1.09	1.07	0.99	1.13	1.06	1.12	0.89	0.85	0.84	0.78	0.88	0.83	0.87
48219.50	1.14	1.09	1.07	0.99	1.13	1.06	1.12	0.89	0.85	0.84	0.78	0.88	0.83	0.87
48218.50	1.14	1.09	1.07	0.99	1.13	1.06	1.12	0.89	0.85	0.84	0.78	0.89	0.83	0.87
48217.50	1.14	1.09	1.07	0.99	1.13	1.06	1.12	0.89	0.85	0.84	0.78	0.89	0.83	0.87
48216.50	1.14	1.09	1.07	0.99	1.13	1.06	1.12	0.89	0.85	0.84	0.78	0.89	0.83	0.87
48215.50	1.14	1.09	1.07	0.99	1.13	1.06	1.12	0.89	0.86	0.85	0.78	0.89	0.83	0.87
48214.50	1.14	1.09	1.07	0.99	1.13	1.06	1.12	0.89	0.86	0.85	0.78	0.89	0.83	0.87
48213.50	1.14	1.09	1.07	0.99	1.13	1.06	1.12	0.89	0.86	0.85	0.78	0.89	0.84	0.88
48212.50	1.14	1.09	1.07	0.99	1.13	1.06	1.12	0.89	0.86	0.85	0.78	0.89	0.84	0.88
48211.50	1.14	1.09	1.07	0.99	1.13	1.06	1.12	0.89	0.86	0.85	0.78	0.89	0.84	0.88
48210.50	1.14	1.09	1.07	0.99	1.13	1.06	1.12	0.89	0.86	0.85	0.79	0.89	0.84	0.88
48209.50	1.14	1.09	1.07	0.99	1.13	1.06	1.12	0.90	0.86	0.85	0.79	0.89	0.84	0.88
48208.50	1.14	1.09	1.07	0.99	1.13	1.06	1.12	0.90	0.86	0.85	0.79	0.89	0.84	0.88
48207.50	1.14	1.09	1.07	0.99	1.13	1.06	1.12	0.90	0.86	0.85	0.79	0.89	0.84	0.88
48206.50	1.14	1.09	1.07	0.99	1.13	1.06	1.12	0.90	0.86	0.85	0.79	0.89	0.84	0.88
48205.50	1.14	1.09	1.07	0.99	1.13	1.06	1.12	0.90	0.86	0.85	0.79	0.89	0.84	0.88
48204.50	1.14	1.09	1.07	0.99	1.13	1.06	1.12	0.90	0.86	0.85	0.79	0.90	0.84	0.88
48203.50	1.14	1.09	1.07	0.99	1.13	1.06	1.12	0.90	0.86	0.85	0.79	0.90	0.84	0.88
48202.50	1.14	1.09	1.07	0.99	1.13	1.06	1.12	0.90	0.86	0.85	0.79	0.90	0.84	0.88
48201.50	1.14	1.09	1.07	0.99	1.13	1.06	1.12	0.90	0.86	0.85	0.79	0.90	0.84	0.88
48200.50	1.14	1.09	1.07	0.99	1.13	1.06	1.12	0.90	0.87	0.86	0.79	0.90	0.84	0.88
48199.50	1.14	1.09	1.07	0.99	1.13	1.06	1.12	0.90	0.87	0.86	0.79	0.90	0.85	0.89
48198.50	1.14	1.09	1.07	0.99	1.13	1.06	1.12	0.90	0.87	0.86	0.79	0.90	0.85	0.89
48197.50	1.14	1.09	1.07	0.99	1.13	1.06	1.12	0.90	0.87	0.86	0.79	0.90	0.85	0.89
48196.50	1.14	1.09	1.07	0.99	1.13	1.06	1.12	0.91	0.87	0.86	0.79	0.90	0.85	0.89
48195.50	1.14	1.09	1.07	0.99	1.13	1.06	1.12	0.91	0.87	0.86	0.80	0.90	0.85	0.89
48194.50	1.14	1.09	1.07	0.99	1.13	1.06	1.12	0.91	0.87	0.86	0.80	0.90	0.85	0.89
48193.50	1.14	1.09	1.07	0.99	1.13	1.06	1.12	0.91	0.87	0.86	0.80	0.90	0.85	0.89
48192.50	1.14	1.09	1.07	0.99	1.13	1.06	1.12	0.91	0.87	0.86	0.80	0.91	0.85	0.89
48191.50	1.14	1.09	1.07	0.99	1.13	1.06	1.12	0.91	0.87	0.86	0.80	0.91	0.85	0.89
48190.50	1.14	1.09	1.07	0.99	1.13	1.06	1.12	0.91	0.87	0.86	0.80	0.91	0.85	0.89
48189.50	1.14	1.09	1.07	0.99	1.13	1.06	1.12	0.91	0.87	0.86	0.80	0.91	0.85	0.89
48188.50	1.14	1.09	1.07	0.99	1.13	1.06	1.12	0.91	0.87	0.86	0.80	0.91	0.85	0.89
48187.50	1.14	1.09	1.07	0.99	1.13	1.06	1.12	0.91	0.88	0.86	0.80	0.91	0.85	0.90
48186.50	1.14	1.09	1.07	0.99	1.13	1.06	1.12	0.91	0.88	0.87	0.80	0.91	0.86	0.90
48185.50	1.14	1.09	1.07	0.99	1.13	1.06	1.12	0.92	0.88	0.87	0.80	0.91	0.86	0.90
48184.50	1.14	1.09	1.07	0.99	1.13	1.06	1.12	0.92	0.88	0.87	0.80	0.91	0.86	0.90
48183.50	1.14	1.09	1.07	0.99	1.13	1.06	1.12	0.92	0.88	0.87	0.80	0.91	0.86	0.90
48182.50	1.14	1.09	1.07	0.99	1.13	1.06	1.12	0.92	0.88	0.87	0.81	0.91	0.86	0.90
48181.50	1.14	1.09	1.07	0.99	1.13	1.06	1.12	0.92	0.88	0.87	0.81	0.92	0.86	0.90
48180.50	1.14	1.09	1.07	0.99	1.13	1.06	1.12	0.92	0.88	0.87	0.81	0.92	0.86	0.90
48179.50	1.14	1.09	1.07	0.99	1.13	1.06	1.12	0.92	0.88	0.87	0.81	0.92	0.86	0.90
48178.50	1.14	1.09	1.07	0.99	1.13	1.06	1.12	0.92	0.88	0.87	0.81	0.92	0.86	0.90
48177.50	1.14	1.09	1.07	0.99	1.13	1.06	1.12	0.92	0.88	0.87	0.81	0.92	0.86	0.90
48176.50	1.14	1.09	1.07	0.99	1.13	1.06	1.12	0.92	0.88	0.87	0.81	0.92	0.86	0.91
48175.50	1.14	1.09	1.07	0.99	1.13	1.06	1.12	0.93	0.89	0.87	0.81	0.92	0.87	0.91
48174.50	1.14	1.09	1.07	0.99	1.13	1.06	1.12	0.93	0.89	0.88	0.81	0.92	0.87	0.91
48173.50	1.14	1.09	1.07	0.99	1.13	1.06	1.12	0.93	0.89	0.88	0.81	0.92	0.87	0.91
48172.50	1.14	1.09	1.07	0.99	1.13	1.06	1.12	0.93	0.89	0.88	0.81	0.92	0.87	0.91
48171.50	1.14	1.09	1.07	0.99	1.13	1.06	1.12	0.93	0.89	0.88	0.81	0.93	0.87	0.91
48170.50	1.14	1.09	1.07	0.99	1.13	1.06	1.12	0.93	0.89	0.88	0.82	0.93	0.87	0.91
48169.50	1.14	1.09	1.07	0.99	1.13	1.06	1.12	0.93	0.89	0.88	0.82	0.93	0.87	0.91
48168.50	1.14	1.09	1.07	0.99	1.13	1.06	1.12	0.93	0.89	0.88	0.82	0.93	0.87	0.91
48167.50	1.14	1.09	1.07	0.99	1.13	1.06	1.12	0.93	0.89	0.88	0.82	0.93	0.87	0.91
48166.50	1.14	1.09	1.07	0.99	1.13	1.06	1.12	0.94	0.89	0.88	0.82	0.93	0.87	0.91
48165.50	1.14	1.09	1.07	0.99	1.13	1.06	1.12	0.94	0.89	0.88	0.82	0.93	0.87	0.92
48164.50	1.14	1.09	1.07	0.99	1.13	1.06	1.12	0.94	0.90	0.88	0.82	0.93	0.88	0.92
48163.50	1.14	1.09	1.07	0.99	1.13	1.06	1.12	0.94	0.90	0.89	0.82	0.93	0.88	0.92
48162.50	1.14	1.09	1.07	0.99	1.13	1.06	1.12	0.94	0.90	0.89	0.82	0.93	0.88	0.92
48161.50	1.14	1.09	1.07	0.99	1.13	1.06	1.12	0.94	0.90	0.89	0.82	0.94	0.88	0.92
48160.50	1.14	1.09	1.07	0.99	1.13	1.06	1.12	0.94	0.90	0.89	0.82	0.94	0.88	0.92
48159.50	1.14	1.09	1.07	0.99	1.13	1.06	1.12	0.94	0.90	0.89	0.82	0.94	0.88	0.92
48158.50	1.14	1.09	1.07	0.99	1.13	1.06	1.12	0.94	0.90	0.89	0.83	0.94	0.88	0.92
48157.50	1.14	1.09	1.07	0.99	1.13	1.06	1.12	0.95	0.90	0.89	0.83	0.94	0.88	0.92
48156.50	1.14	1.09	1.07	0.99	1.13	1.06	1.12	0.95	0.90	0.89	0.83	0.94	0.88	0.92
48155.50	1.14	1.09	1.07	0.99	1.13	1.06	1.12	0.95	0.90	0.89	0.83	0.94	0.88	0.93
48154.50	1.14	1.09	1.07	0.99	1.13	1.06	1.12	0.95	0.91	0.89	0.83	0.94	0.89	0.93
48153.50	1.14	1.09	1.07	0.99	1.13	1.06	1.12	0.95	0.91	0.90	0.83	0.94	0.89	0.93
48152.50	1.14	1.09	1.07	0.99	1.13	1.06	1.12	0.95	0.91	0.90	0.83	0.95	0.89	0.93
48151.50	1.14	1.09	1.07	0.99	1.13	1.06	1.12	0.95	0.91	0.90	0.83	0.95	0.89	0.93
48150.50	1.14	1.09	1.07	0.99	1.13	1.06	1.12	0.95	0.91	0.90	0.83	0.95	0.89	0.93
48149.50	1.14	1.09	1.07	0.99	1.13	1.06	1.12	0.95	0.91	0.90	0.83	0.95	0.89	0.93
48148.50	1.14	1.09	1.07	0.99	1.13	1.06	1.12	0.96	0.91	0.90	0.84	0.95	0.89	0.93
48147.50	1.14	1.09	1.07	0.99	1.13	1.06	1.12	0.96	0.91	0.90	0.84	0.95	0.89	0.93
48146.50	1.14	1.09	1.07	0.99	1.13	1.06	1.12	0.96	0.91	0.90	0.84	0.95	0.89	0.94
48145.50	1.14	1.09	1.07	0.99	1.13	1.06	1.12	0.96	0.91	0.90	0.84	0.95	0.90	0.94
48144.50	1.14	1.09	1.07	0.99	1.13	1.06	1.12	0.96	0.92	0.90	0.84	0.95	0.90	0.94
48143.50	1.14	1.09	1.07	0.99	1.13	1.06	1.12	0.96	0.92	0.91	0.84	0.96	0.90	0.94
48142.50	1.14	1.09	1.07	0.99	1.13	1.06	1.12	0.96	0.92	0.91	0.84	0.96	0.90	0.94
48141.50	1.14	1.09	1.07	0.99	1.13	1.06	1.12	0.96	0.92	0.91	0.84	0.96	0.90	0.94
48140.50	1.13	1.09	1.07	0.99	1.13	1.06	1.12	0.97	0.92	0.91	0.84	0.96	0.90	0.94
48139.50	1.13	1.09	1.07	0.99	1.13	1.06	1.12	0.97	0.92	0.91	0.84	0.96	0.90	0.94
48138.50	1.13	1.09	1.07	0.99	1.13	1.06	1.12	0.97	0.92	0.91	0.85	0.96	0.90	0.94
48137.50	1.13	1.09	1.07	0.99	1.13	1.06	1.12	0.97	0.92	0.91	0.85	0.96	0.90	0.95
48136.50	1.13	1.09	1.07	0.99	1.13	1.06	1.12	0.97	0.92	0.91	0.85	0.96	0.91	0.95
48135.50	1.13	1.09	1.07	0.99	1.13	1.06	1.12	0.97	0.93	0.91	0.85	0.97	0.91	0.95
48134.50	1.13	1.09	1.07	0.99	1.13	1.06	1.12	0.97	0.93	0.91	0.85	0.97	0.91	0.95
48133.50	1.13	1.09	1.07	0.99	1.13	1.06	1.12	0.97	0.93	0.92	0.85	0.97	0.91	0.95
48132.50	1.13	1.09	1.07	0.99	1.13	1.06	1.12	0.98	0.93	0.92	0.85	0.97	0.91	0.95
48131.50	1.13	1.09	1.07	0.99	1.13	1.06	1.12	0.98	0.93	0.92	0.85	0.97	0.91	0.95
48130.50	1.13	1.09	1.07	0.99	1.13	1.06	1.12	0.98	0.93	0.92	0.85	0.97	0.91	0.95
48129.50	1.13	1.09	1.07	0.99	1.13	1.06	1.12	0.98	0.93	0.92	0.85	0.97	0.91	0.96
48128.50	1.13	1.09	1.07	0.99	1.13	1.06	1.12	0.98	0.93	0.92	0.86	0.97	0.91	0.96
48127.50	1.13	1.09	1.07	0.99	1.13	1.06	1.12	0.98	0.93	0.92	0.86	0.98	0.92	0.96
48126.50	1.13	1.09	1.07	0.99	1.13	1.06	1.12	0.98	0.94	0.92	0.86	0.98	0.92	0.96
48125.50	1.13	1.09	1.07	0.99	1.13	1.06	1.12	0.99	0.94	0.92	0.86	0.98	0.92	0.96
48124.50	1.13	1.09	1.07	0.99	1.13	1.06	1.12	0.99	0.94	0.93	0.86	0.98	0.92	0.96
48123.50	1.13	1.09	1.07	0.99	1.13	1.06	1.12	0.99	0.94	0.93	0.86	0.98	0.92	0.96
48122.50	1.13	1.09	1.07	0.99	1.13	1.06	1.12	0.99	0.94	0.93	0.86	0.98	0.92	0.96
48121.50	1.13	1.09	1.07	0.99	1.13	1.06	1.12	0.99	0.94	0.93	0.86	0.98	0.92	0.97
48120.50	1.13	1.09	1.07	0.99	1.13	1.06	1.12	0.99	0.94	0.93	0.86	0.98	0.92	0.97
48119.50	1.13	1.09	1.07	0.99	1.13	1.06	1.12	0.99	0.94	0.93	0.87	0.99	0.93	0.97
48118.50	1.13	1.09	1.07	0.99	1.13	1.06	1.12	0.99	0.95	0.93	0.87	0.99	0.93	0.97
48117.50	1.13	1.09	1.07	0.99	1.13	1.06	1.12	1.00	0.95	0.93	0.87	0.99	0.93	0.97
48116.50	1.13	1.09	1.07	0.99	1.13	1.06	1.12	1.00	0.95	0.93	0.87	0.99	0.93	0.97
48115.50	1.13	1.09	1.07	0.99	1.13	1.06	1.12	1.00	0.95	0.94	0.87	0.99	0.93	0.97
48114.50	1.13	1.09	1.07	0.99	1.13	1.06	1.12	1.00	0.95	0.94	0.87	0.99	0.93	0.97
48113.50	1.13	1.09	1.07	0.99	1.13	1.06	1.12	1.00	0.95	0.94	0.87	0.99	0.93	0.98
48112.50	1.13	1.09	1.07	0.99	1.13	1.06	1.12	1.00	0.95	0.94	0.87	1.00	0.93	0.98
48111.50	1.13	1.09	1.07	0.99	1.13	1.06	1.12	1.00	0.95	0.94	0.87	1.00	0.93	0.98
48110.50	1.13	1.09	1.07	0.99	1.13	1.06	1.12	1.01	0.95	0.94	0.87	1.00	0.94	0.98
48109.50	1.13	1.09	1.07	0.99	1.13	1.06	1.12	1.01	0.96	0.94	0.88	1.00	0.94	0.98
48108.50	1.13	1.09	1.07	0.99	1.13	1.06	1.12	1.01	0.96	0.94	0.88	1.00	0.94	0.98
48107.50	1.13	1.09	1.07	0.99	1.13	1.06	1.12	1.01	0.96	0.95	0.88	1.00	0.94	0.98
48106.50	1.13	1.09	1.07	0.99	1.13	1.06	1.12	1.01	0.96	0.95	0.88	1.00	0.94	0.98
48105.50	1.13	1.09	1.07	0.99	1.13	1.06	1.12	1.01	0.96	0.95	0.88	1.01	0.94	0.99
48104.50	1.13	1.09	1.07	0.99	1.13	1.06	1.12	1.01	0.96	0.95	0.88	1.01	0.94	0.99
48103.50	1.13	1.09	1.07	0.99	1.13	1.06	1.12	1.02	0.96	0.95	0.88	1.01	0.95	0.99
48102.50	1.13	1.09	1.07	0.99	1.13	1.06	1.12	1.02	0.96	0.95	0.88	1.01	0.95	0.99
48101.50	1.13	1.09	1.07	0.99	1.13	1.06	1.12	1.02	0.97	0.95	0.88	1.01	0.95	0.99
48100.50	1.13	1.09	1.07	0.99	1.13	1.06	1.12	1.02	0.97	0.95	0.89	1.01	0.95	0.99
48099.50	1.13	1.09	1.07	0.99	1.13	1.06	1.12	1.02	0.97	0.95	0.89	1.01	0.95	0.99
48098.50	1.13	1.09	1.07	0.99	1.13	1.06	1.12	1.02	0.97	0.96	0.89	1.01	0.95	0.99
48097.50	1.13	1.09	1.07	0.99	1.13	1.06	1.12	1.02	0.97	0.96	0.89	1.02	0.95	1.00
48096.50	1.13	1.09	1.07	0.99	1.13	1.06	1.12	1.03	0.97	0.96	0.89	1.02	0.95	1.00
48095.50	1.13	1.09	1.07	0.99	1.13	1.06	1.12	1.03	0.97	0.96	0.89	1.02	0.96	1.00
48094.50	1.13	1.09	1.07	0.99	1.13	1.06	1.12	1.03	0.97	0.96	0.89	1.02	0.96	1.00
48093.50	1.13	1.09	1.07	0.99	1.13	1.06	1.12	1.03	0.98	0.96	0.89	1.02	0.96	1.00
48092.50	1.13	1.09	1.07	0.99	1.13	1.06	1.12	1.03	0.98	0.96	0.90	1.02	0.96	1.00
48091.50	1.13	1.09	1.07	0.99	1.13	1.06	1.12	1.03	0.98	0.96	0.90	1.02	0.96	1.00
48090.50	1.13	1.09	1.07	0.99	1.13	1.06	1.12	1.03	0.98	0.97	0.90	1.03	0.96	1.01
48089.50	1.13	1.09	1.07	0.99	1.13	1.06	1.12	1.04	0.98	0.97	0.90	1.03	0.96	1.01
48088.50	1.13	1.09	1.07	0.99	1.13	1.06	1.12	1.04	0.98	0.97	0.90	1.03	0.96	1.01
48087.50	1.13	1.09	1.07	0.99	1.13	1.06	1.12	1.04	0.98	0.97	0.90	1.03	0.97	1.01
48086.50	1.13	1.09	1.07	0.99	1.13	1.06	1.12	1.04	0.98	0.97	0.90	1.03	0.97	1.01
48085.50	1.13	1.09	1.07	0.99	1.13	1.06	1.12	1.04	0.99	0.97	0.90	1.03	0.97	1.01
48084.50	1.13	1.09	1.07	0.99	1.13	1.06	1.12	1.04	0.99	0.97	0.90	1.03	0.97	1.01
48083.50	1.13	1.09	1.07	0.99	1.13	1.06	1.12	1.05	0.99	0.97	0.91	1.04	0.97	1.01
48082.50	1.13	1.09	1.07	0.99	1.13	1.06	1.12	1.05	0.99	0.98	0.91	1.04	0.97	1.02
48081.50	1.13	1.09	1.07	0.99	1.13	1.06	1.12	1.05	0.99	0.98	0.91	1.04	0.97	1.02
48080.50	1.13	1.09	1.07	0.99	1.13	1.06	1.12	1.05	0.99	0.98	0.91	1.04	0.98	1.02
48079.50	1.13	1.09	1.07	0.99	1.13	1.06	1.12	1.05	0.99	0.98	0.91	1.04	0.98	1.02
48078.50	1.13	1.09	1.07	0.99	1.13	1.06	1.12	1.05	0.99	0.98	0.91	1.04	0.98	1.02
48077.50	1.13	1.08	1.07	0.99	1.13	1.06	1.12	1.05	1.00	0.98	0.91	1.05	0.98	1.02
48076.50	1.13	1.08	1.07	0.99	1.13	1.06	1.12	1.06	1.00	0.98	0.91	1.05	0.98	1.02
48075.50	1.13	1.08	1.07	0.99	1.13	1.06	1.12	1.06	1.00	0.98	0.92	1.05	0.98	1.03
48074.50	1.13	1.08	1.07	0.99	1.13	1.06	1.12	1.06	1.00	0.99	0.92	1.05	0.98	1.03
48073.50	1.13	1.08	1.07	0.99	1.13	1.06	1.12	1.06	1.00	0.99	0.92	1.05	0.98	1.03
48072.50	1.13	1.08	1.07	0.99	1.13	1.06	1.12	1.06	1.00	0.99	0.92	1.05	0.99	1.03
48071.50	1.13	1.08	1.07	0.99	1.13	1.06	1.12	1.06	1.00	0.99	0.92	1.05	0.99	1.03
48070.50	1.13	1.08	1.07	0.99	1.13	1.06	1.12	1.06	1.00	0.99	0.92	1.06	0.99	1.03
48069.50	1.13	1.08	1.07	0.99	1.13	1.06	1.12	1.07	1.01	0.99	0.92	1.06	0.99	1.03
48068.50	1.13	1.08	1.07	0.99	1.13	1.06	1.12	1.07	1.01	0.99	0.92	1.06	0.99	1.04
48067.50	1.13	1.08	1.07	0.99	1.13	1.06	1.12	1.07	1.01	0.99	0.92	1.06	0.99	1.04
48066.50	1.13	1.08	1.07	0.99	1.13	1.06	1.12	1.07	1.01	1.00	0.93	1.06	0.99	1.04
48065.50	1.13	1.08	1.07	0.99	1.13	1.06	1.12	1.07	1.01	1.00	0.93	1.06	1.00	1.04
48064.50	1.13	1.08	1.07	0.99	1.13	1.06	1.12	1.07	1.01	1.00	0.93	1.06	1.00	1.04
48063.50	1.13	1.08	1.07	0.99	1.13	1.06	1.12	1.08	1.01	1.00	0.93	1.07	1.00	1.04
48062.50	1.13	1.08	1.07	0.99	1.13	1.06	1.12	1.08	1.01	1.00	0.93	1.07	1.00	1.04
48061.50	1.13	1.08	1.07	0.99	1.13	1.06	1.12	1.08	1.02	1.00	0.93	1.07	1.00	1.05
48060.50	1.13	1.08	1.07	0.99	1.13	1.06	1.12	1.08	1.02	1.00	0.93	1.07	1.00	1.05
48059.50	1.13	1.08	1.07	0.99	1.13	1.06	1.11	1.08	1.02	1.00	0.93	1.07	1.00	1.05
48058.50	1.13	1.08	1.07	0.99	1.13	1.06	1.11	1.08	1.02	1.01	0.94	1.07	1.01	1.05
48057.50	1.13	1.08	1.07	0.99	1.13	1.06	1.11	1.08	1.02	1.01	0.94	1.07	1.01	1.05
48056.50	1.13	1.08	1.07	0.99	1.13	1.06	1.11	1.09	1.02	1.01	0.94	1.08	1.01	1.05
48055.50	1.13	1.08	1.07	0.99	1.13	1.06	1.11	1.09	1.02	1.01	0.94	1.08	1.01	1.05
48054.50	1.13	1.08	1.07	0.99	1.13	1.06	1.11	1.09	1.03	1.01	0.94	1.08	1.01	1.06
48053.50	1.13	1.08	1.07	0.99	1.13	1.06	1.11	1.09	1.03	1.01	0.94	1.08	1.01	1.06
48052.50	1.13	1.08	1.07	0.99	1.13	1.06	1.11	1.09	1.03	1.01	0.94	1.08	1.01	1.06
48051.50	1.13	1.08	1.07	0.99	1.13	1.06	1.11	1.09	1.03	1.01	0.94	1.08	1.01	1.06
48050.50	1.13	1.08	1.07	0.99	1.13	1.06	1.11	1.10	1.03	1.02	0.94	1.09	1.02	1.06
48049.50	1.13	1.08	1.07	0.99	1.13	1.06	1.11	1.10	1.03	1.02	0.95	1.09	1.02	1.06
48048.50	1.13	1.08	1.07	0.99	1.13	1.06	1.11	1.10	1.03	1.02	0.95	1.09	1.02	1.06
48047.50	1.13	1.08	1.07	0.99	1.13	1.06	1.11	1.10	1.03	1.02	0.95	1.09	1.02	1.07
48046.50	1.13	1.08	1.07	0.99	1.13	1.06	1.11	1.10	1.04	1.02	0.95	1.09	1.02	1.07
48045.50	1.13	1.08	1.07	0.99	1.13	1.06	1.11	1.10	1.04	1.02	0.95	1.09	1.02	1.07
48044.50	1.13	1.08	1.07	0.99	1.13	1.06	1.11	1.11	1.04	1.02	0.95	1.09	1.02	1.07
48043.50	1.13	1.08	1.07	0.99	1.13	1.06	1.11	1.11	1.04	1.02	0.95	1.10	1.03	1.07
48042.50	1.13	1.08	1.07	0.99	1.13	1.06	1.11	1.11	1.04	1.03	0.95	1.10	1.03	1.07
48041.50	1.13	1.08	1.07	0.99	1.13	1.06	1.11	1.11	1.04	1.03	0.96	1.10	1.03	1.07
48040.50	1.13	1.08	1.07	0.99	1.13	1.06	1.11	1.11	1.04	1.03	0.96	1.10	1.03	1.07
48039.50	1.13	1.08	1.07	0.99	1.13	1.06	1.11	1.11	1.04	1.03	0.96	1.10	1.03	1.08
48038.50	1.13	1.08	1.07	0.99	1.13	1.06	1.11	1.11	1.05	1.03	0.96	1.10	1.03	1.08
48037.50	1.13	1.08	1.07	0.99	1.13	1.06	1.11	1.12	1.05	1.03	0.96	1.10	1.03	1.08
48036.50	1.13	1.08	1.07	0.99	1.13	1.06	1.11	1.12	1.05	1.03	0.96	1.11	1.04	1.08
48035.50	1.13	1.08	1.07	0.99	1.13	1.06	1.11	1.12	1.05	1.03	0.96	1.11	1.04	1.08
48034.50	1.13	1.08	1.07	0.99	1.13	1.06	1.11	1.12	1.05	1.04	0.96	1.11	1.04	1.08
48033.50	1.13	1.08	1.07	0.99	1.13	1.06	1.11	1.12	1.05	1.04	0.96	1.11	1.04	1.08
48032.50	1.13	1.08	1.07	0.99	1.13	1.06	1.11	1.12	1.05	1.04	0.97	1.11	1.04	1.09
48031.50	1.13	1.08	1.07	0.99	1.13	1.06	1.11	1.13	1.05	1.04	0.97	1.11	1.04	1.09
48030.50	1.13	1.08	1.07	0.99	1.13	1.06	1.11	1.13	1.06	1.04	0.97	1.12	1.04	1.09
48029.50	1.13	1.08	1.07	0.99	1.13	1.06	1.11	1.13	1.06	1.04	0.97	1.12	1.04	1.09
48028.50	1.13	1.08	1.07	0.99	1.13	1.06	1.11	1.13	1.06	1.04	0.97	1.12	1.05	1.09
48027.50	1.13	1.08	1.07	0.99	1.13	1.06	1.11	1.13	1.06	1.04	0.97	1.12	1.05	1.09
48026.50	1.13	1.08	1.07	0.99	1.13	1.06	1.11	1.13	1.06	1.05	0.97	1.12	1.05	1.09
48025.50	1.13	1.08	1.07	0.99	1.13	1.06	1.11	1.13	1.06	1.05	0.97	1.12	1.05	1.10
48024.50	1.13	1.08	1.07	0.99	1.13	1.06	1.11	1.14	1.06	1.05	0.97	1.12	1.05	1.10
48023.50	1.13	1.08	1.07	0.99	1.13	1.06	1.11	1.14	1.07	1.05	0.98	1.13	1.05	1.10
48022.50	1.13	1.08	1.07	0.99	1.13	1.06	1.11	1.14	1.07	1.05	0.98	1.13	1.05	1.10
48021.50	1.13	1.08	1.07	0.99	1.13	1.06	1.11	1.14	1.07	1.05	0.98	1.13	1.06	1.10
48020.50	1.13	1.08	1.07	0.99	1.13	1.06	1.11	1.14	1.07	1.05	0.98	1.13	1.06	1.10
48019.50	1.13	1.08	1.07	0.99	1.13	1.06	1.11	1.14	1.07	1.05	0.98	1.13	1.06	1.10
48018.50	1.13	1.08	1.07	0.99	1.13	1.06	1.11	1.15	1.07	1.06	0.98	1.13	1.06	1.11
48017.50	1.13	1.08	1.07	0.99	1.13	1.06	1.11	1.15	1.07	1.06	0.98	1.13	1.06	1.11
48016.50	1.13	1.08	1.07	0.99	1.13	1.06	1.11	1.15	1.07	1.06	0.98	1.14	1.06	1.11
48015.50	1.13	1.08	1.07	0.99	1.13	1.06	1.11	1.15	1.08	1.06	0.99	1.14	1.06	1.11
48014.50	1.13	1.08	1.07	0.99	1.13	1.06	1.11	1.15	1.08	1.06	0.99	1.14	1.06	1.11
48013.50	1.13	1.08	1.07	0.99	1.13	1.06	1.11	1.15	1.08	1.06	0.99	1.14	1.07	1.11
48012.50	1.13	1.08	1.07	0.99	1.13	1.06	1.11	1.15	1.08	1.06	0.99	1.14	1.07	1.11
48011.50	1.13	1.08	1.07	0.99	1.13	1.06	1.11	1.16	1.08	1.06	0.99	1.14	1.07	1.12
48010.50	1.13	1.08	1.07	0.99	1.13	1.06	1.11	1.16	1.08	1.06	0.99	1.14	1.07	1.12
48009.50	1.13	1.08	1.07	0.99	1.13	1.06	1.11	1.16	1.08	1.07	0.99	1.15	1.07	1.12
48008.50	1.13	1.08	1.07	0.99	1.13	1.06	1.11	1.16	1.08	1.07	0.99	1.15	1.07	1.12
48007.50	1.13	1.08	1.07	0.99	1.13	1.06	1.11	1.16	1.09	1.07	0.99	1.15	1.07	1.12
48006.50	1.13	1.08	1.07	0.99	1.13	1.06	1.11	1.16	1.09	1.07	1.00	1.15	1.08	1.12
48005.50	1.13	1.08	1.07	0.99	1.13	1.06	1.11	1.16	1.09	1.07	1.00	1.15	1.08	1.12
48004.50	1.13	1.08	1.07	0.99	1.13	1.06	1.11	1.17	1.09	1.07	1.00	1.15	1.08	1.12
48003.50	1.13	1.08	1.07	0.99	1.13	1.06	1.11	1.17	1.09	1.07	1.00	1.15	1.08	1.13
48002.50	1.13	1.08	1.07	0.99	1.13	1.06	1.11	1.17	1.09	1.07	1.00	1.16	1.08	1.13
48001.50	1.13	1.08	1.07	0.99	1.13	1.06	1.11	1.17	1.09	1.08	1.00	1.16	1.08	1.13
[truncated: 47,816 more rows]
